# Supplementary material
Source: PubMed Central journal article supplement (PMC3627359)
Supplement: NIHMS453578-supplement-1_si_001.pdf [file NIHMS453578-supplement-1_si_001.pdf]

Supporting Information:

Arylazanyl pyrazolone derivatives as inhibitors of mutant superoxide dismutase 1-dependent protein aggregation for the treatment of amyotrophic lateral sclerosis

Yinan Zhang,<sup>1</sup> Radhia Benmohamed,<sup>2</sup> He Huang,<sup>1</sup> Tian Chen,<sup>1</sup> Cindy Voisine,<sup>3</sup> Richard I. Morimoto<sup>3</sup>, Donald R. Kirsch<sup>2</sup>, and Richard B. Silverman<sup>1,\*</sup>

<sup>1</sup>Department of Chemistry, Department of Molecular Biosciences, Chemistry of Life Processes Institute, Center for Molecular Innovation and Drug Discovery, Northwestern University, Evanston, Illinois 60208-3113, USA

<sup>2</sup>Cambria Pharmaceuticals, Cambridge, Massachusetts 02142, USA

<sup>3</sup>Department of Molecular Biosciences, Rice Institute for Biomedical Research, Northwestern University, Evanston, Illinois 60208-3500, USA

**Table of content**

|                                                                             |         |
|-----------------------------------------------------------------------------|---------|
| Copies of NMR spectra of <b>2-38</b>                                        | S2-S85  |
| Copies of IR of <b>30, 31, 38</b>                                           | S86-S91 |
| Qualitative primary cortical neurons protection assay of selected compounds | S92     |
| EC <sub>50</sub> with viability of compounds <b>1-38</b>                    | S92     |

6.660  
6.649  
6.638  
6.614  
6.589

— 5.353

< 4.105  
4.095

— 3.365

— 2.498

yz-I69  
PROTON DMSO

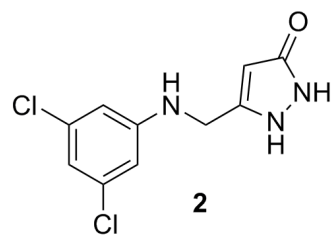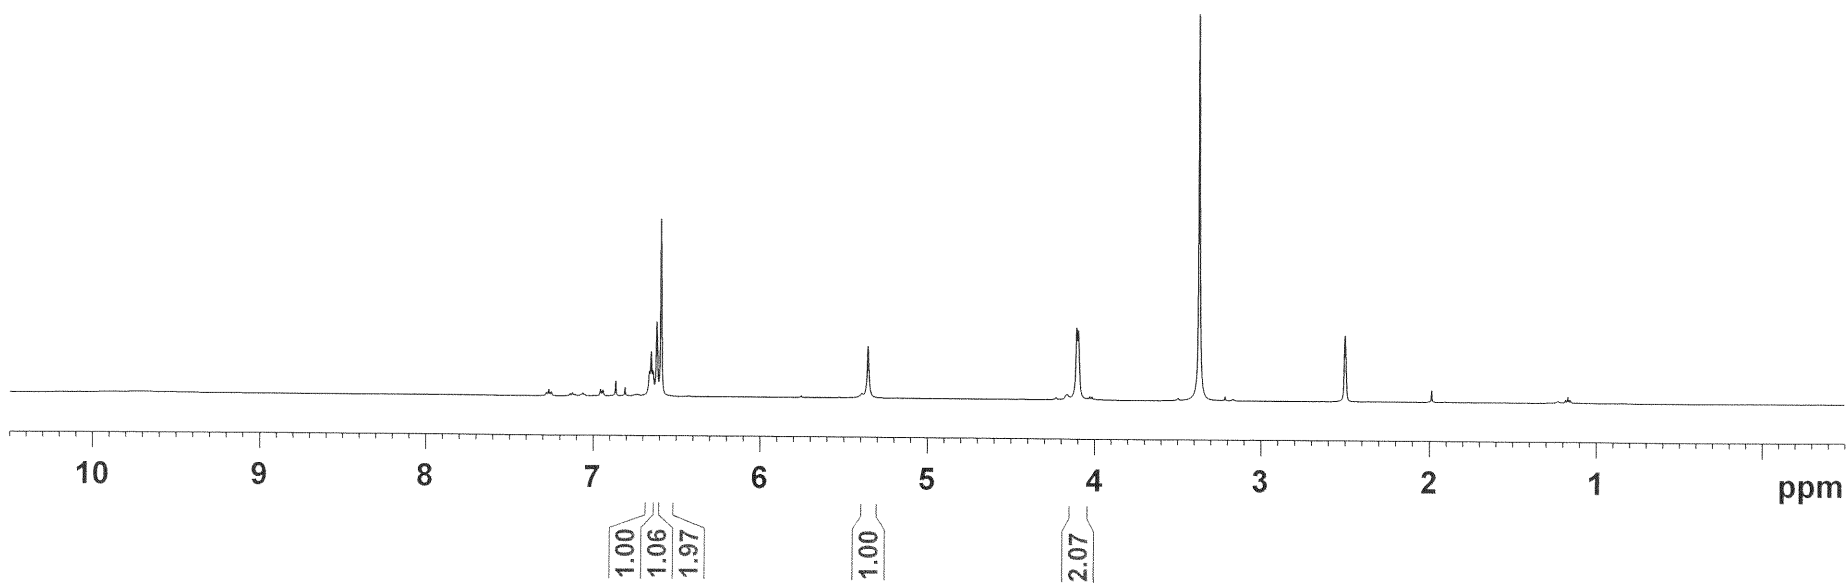

yz-I69  
NU\_C13\_5mg DMSO

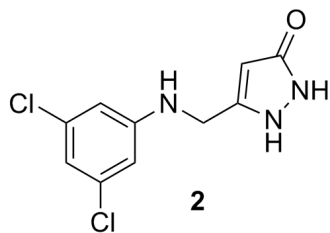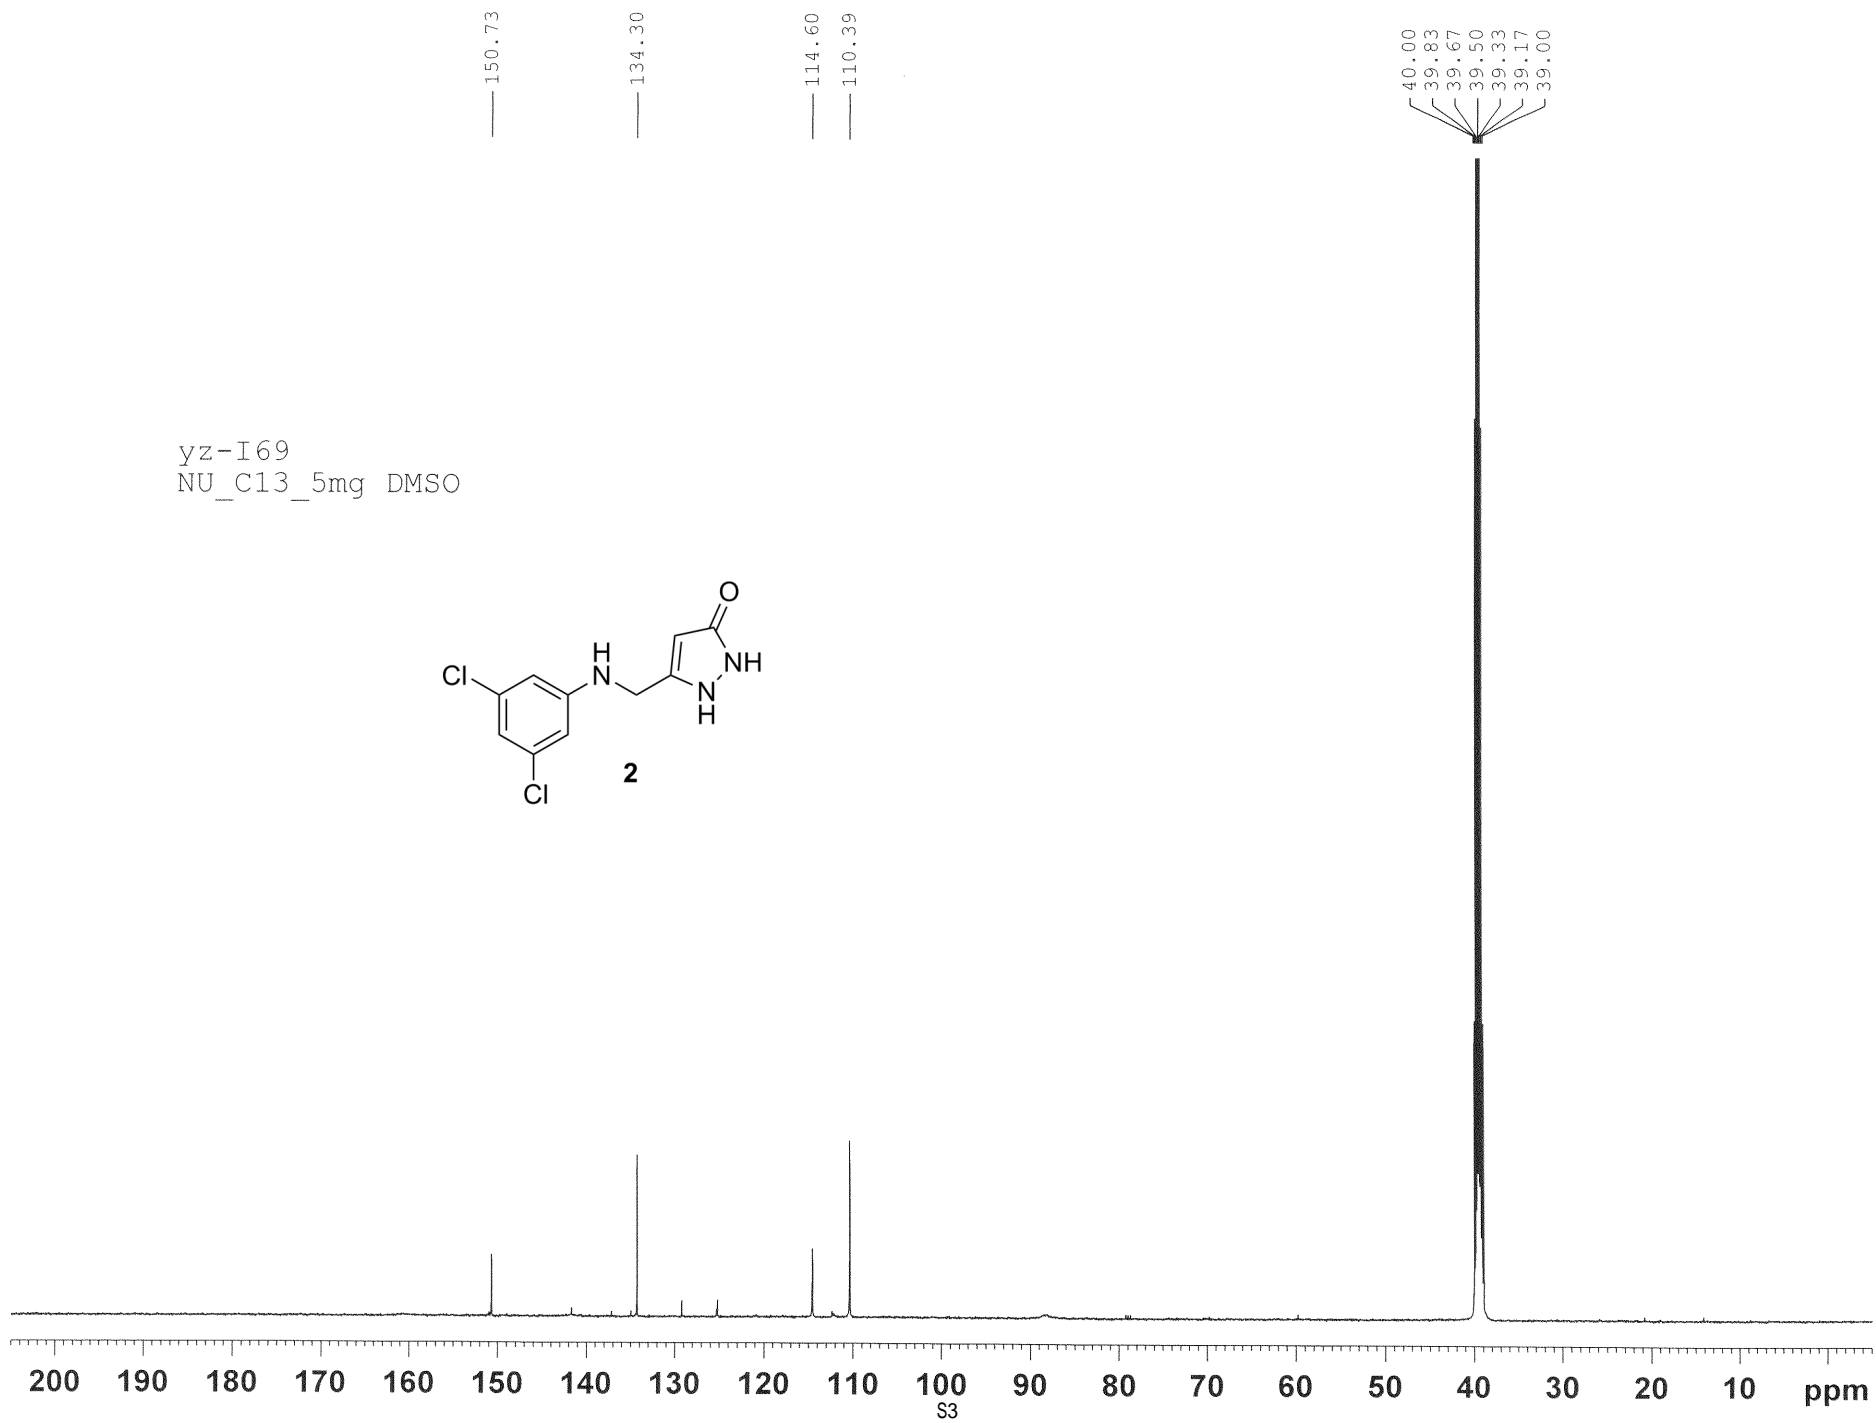

— 9.928

— 6.715

— 5.239

— 4.400

— 2.957

zyn-a17  
PROTON DMSO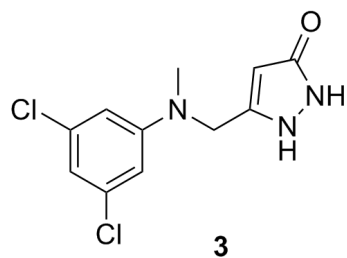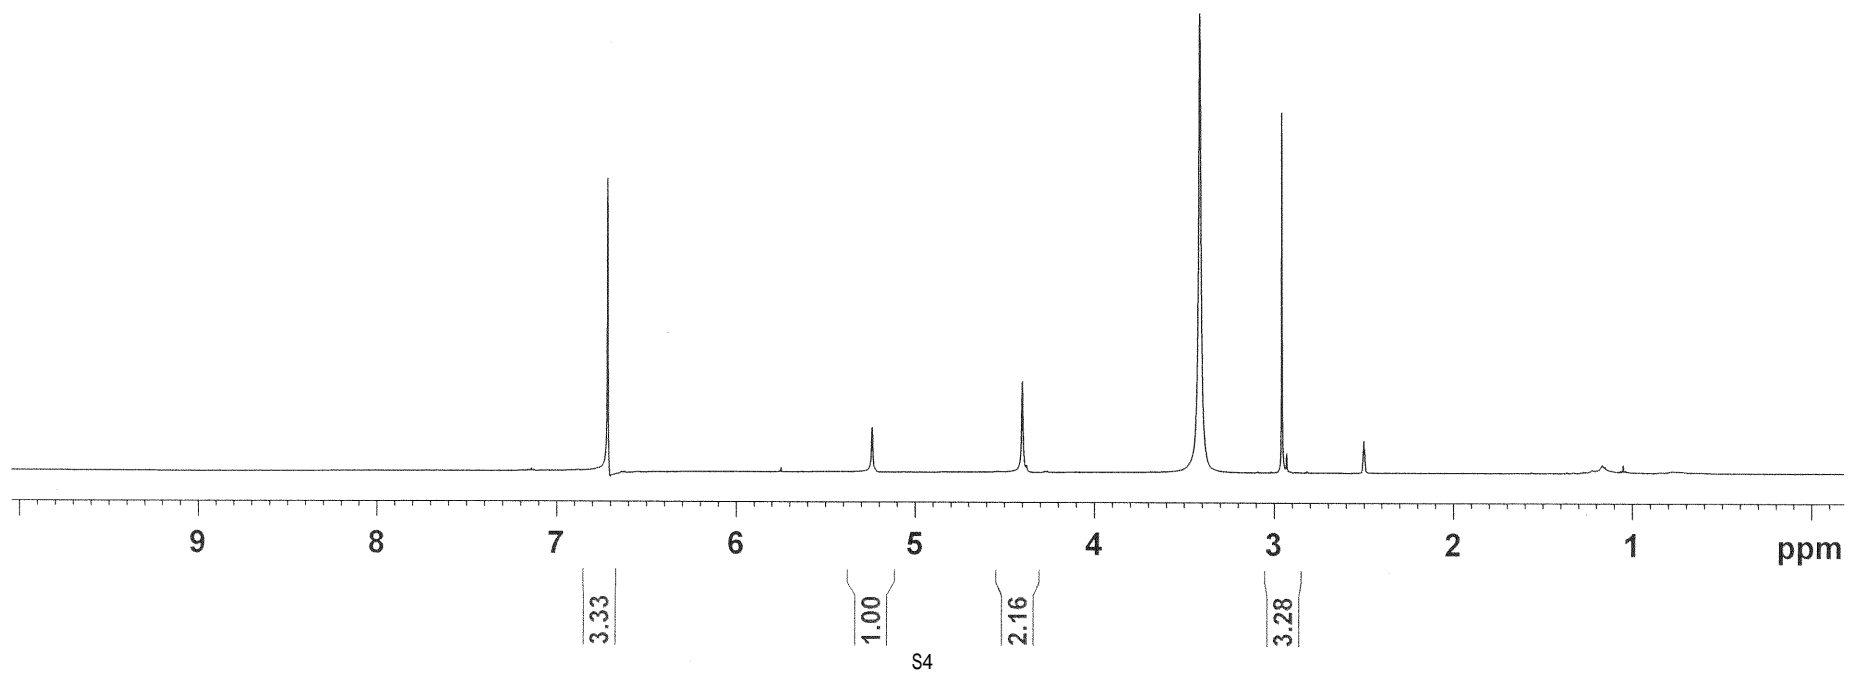

zyn-a17  
NU\_C13\_2mg DMSO

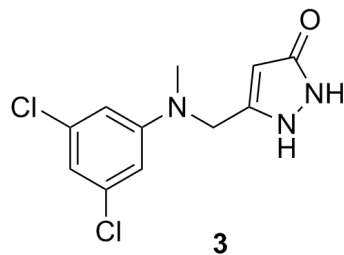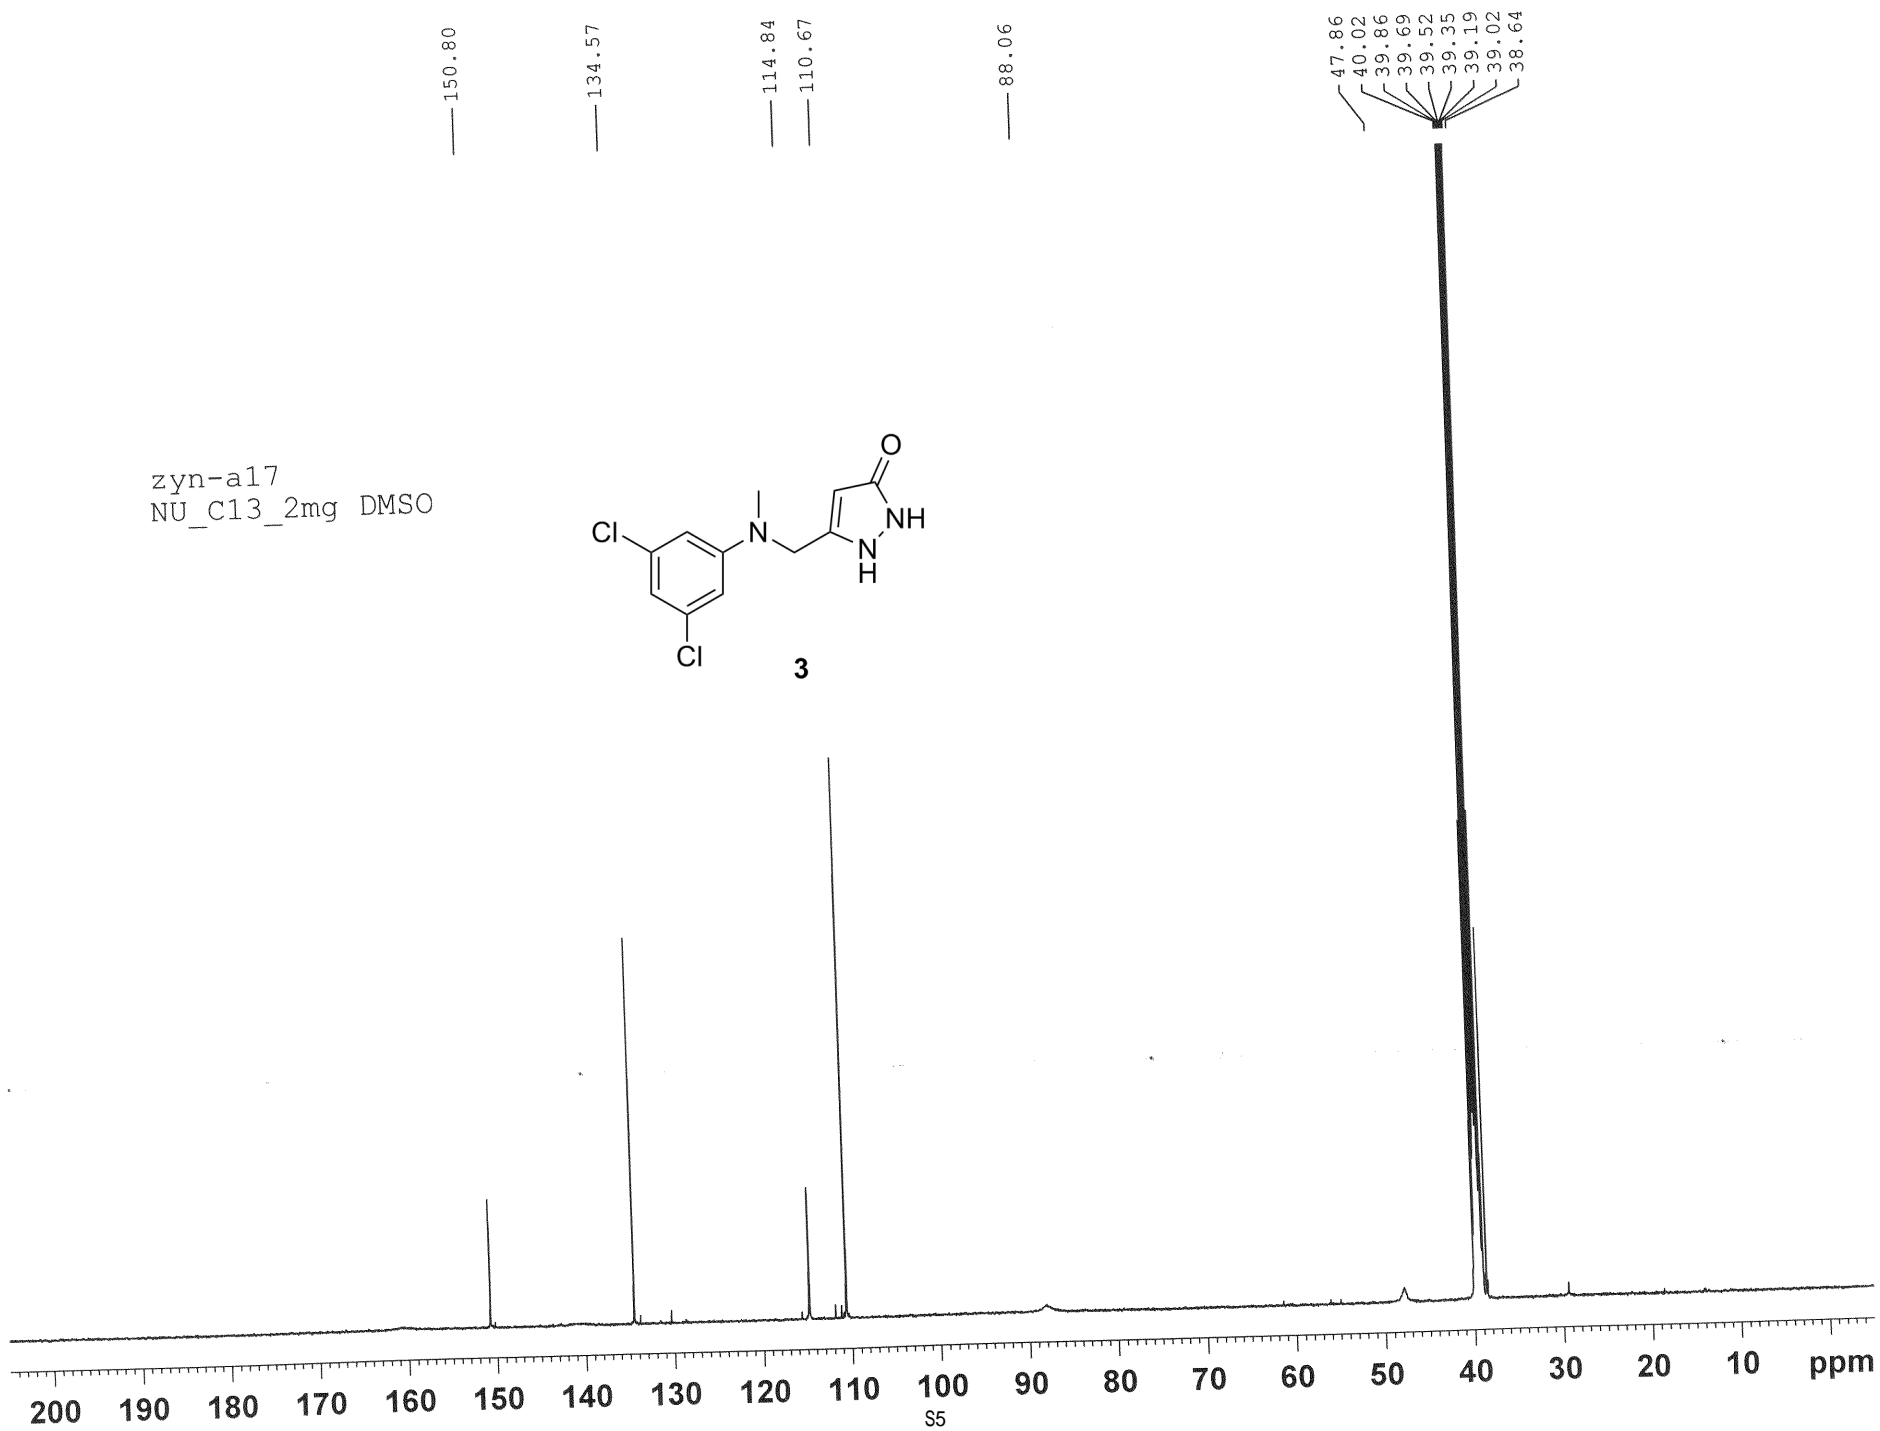

7.165  
7.161  
7.150  
7.147  
7.137  
7.133  
6.767  
6.751  
6.642  
6.627  
6.613  
— 5.207  
— 4.355  
— 3.358  
— 2.902  
2.503  
2.500  
2.497

yz-III108  
PROTON DMSO

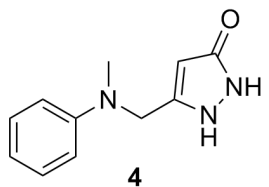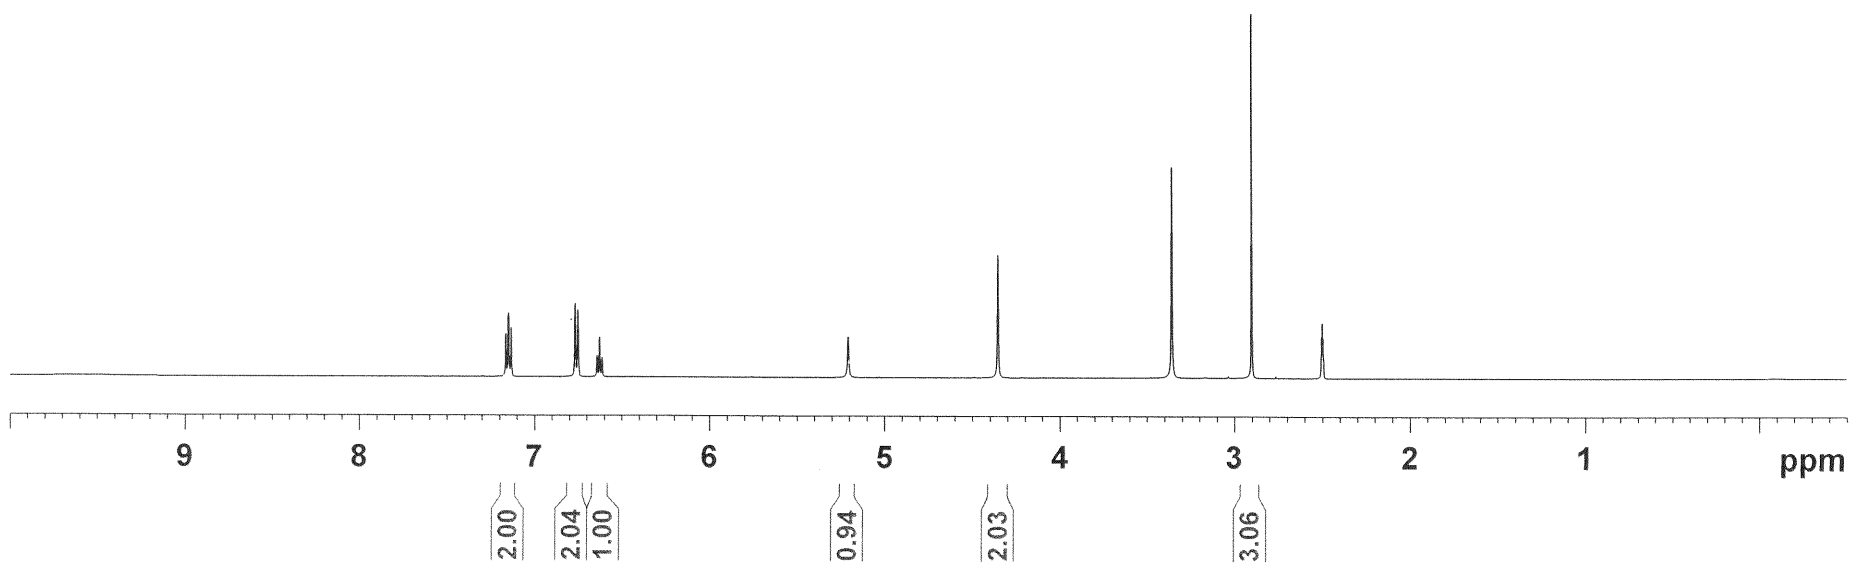

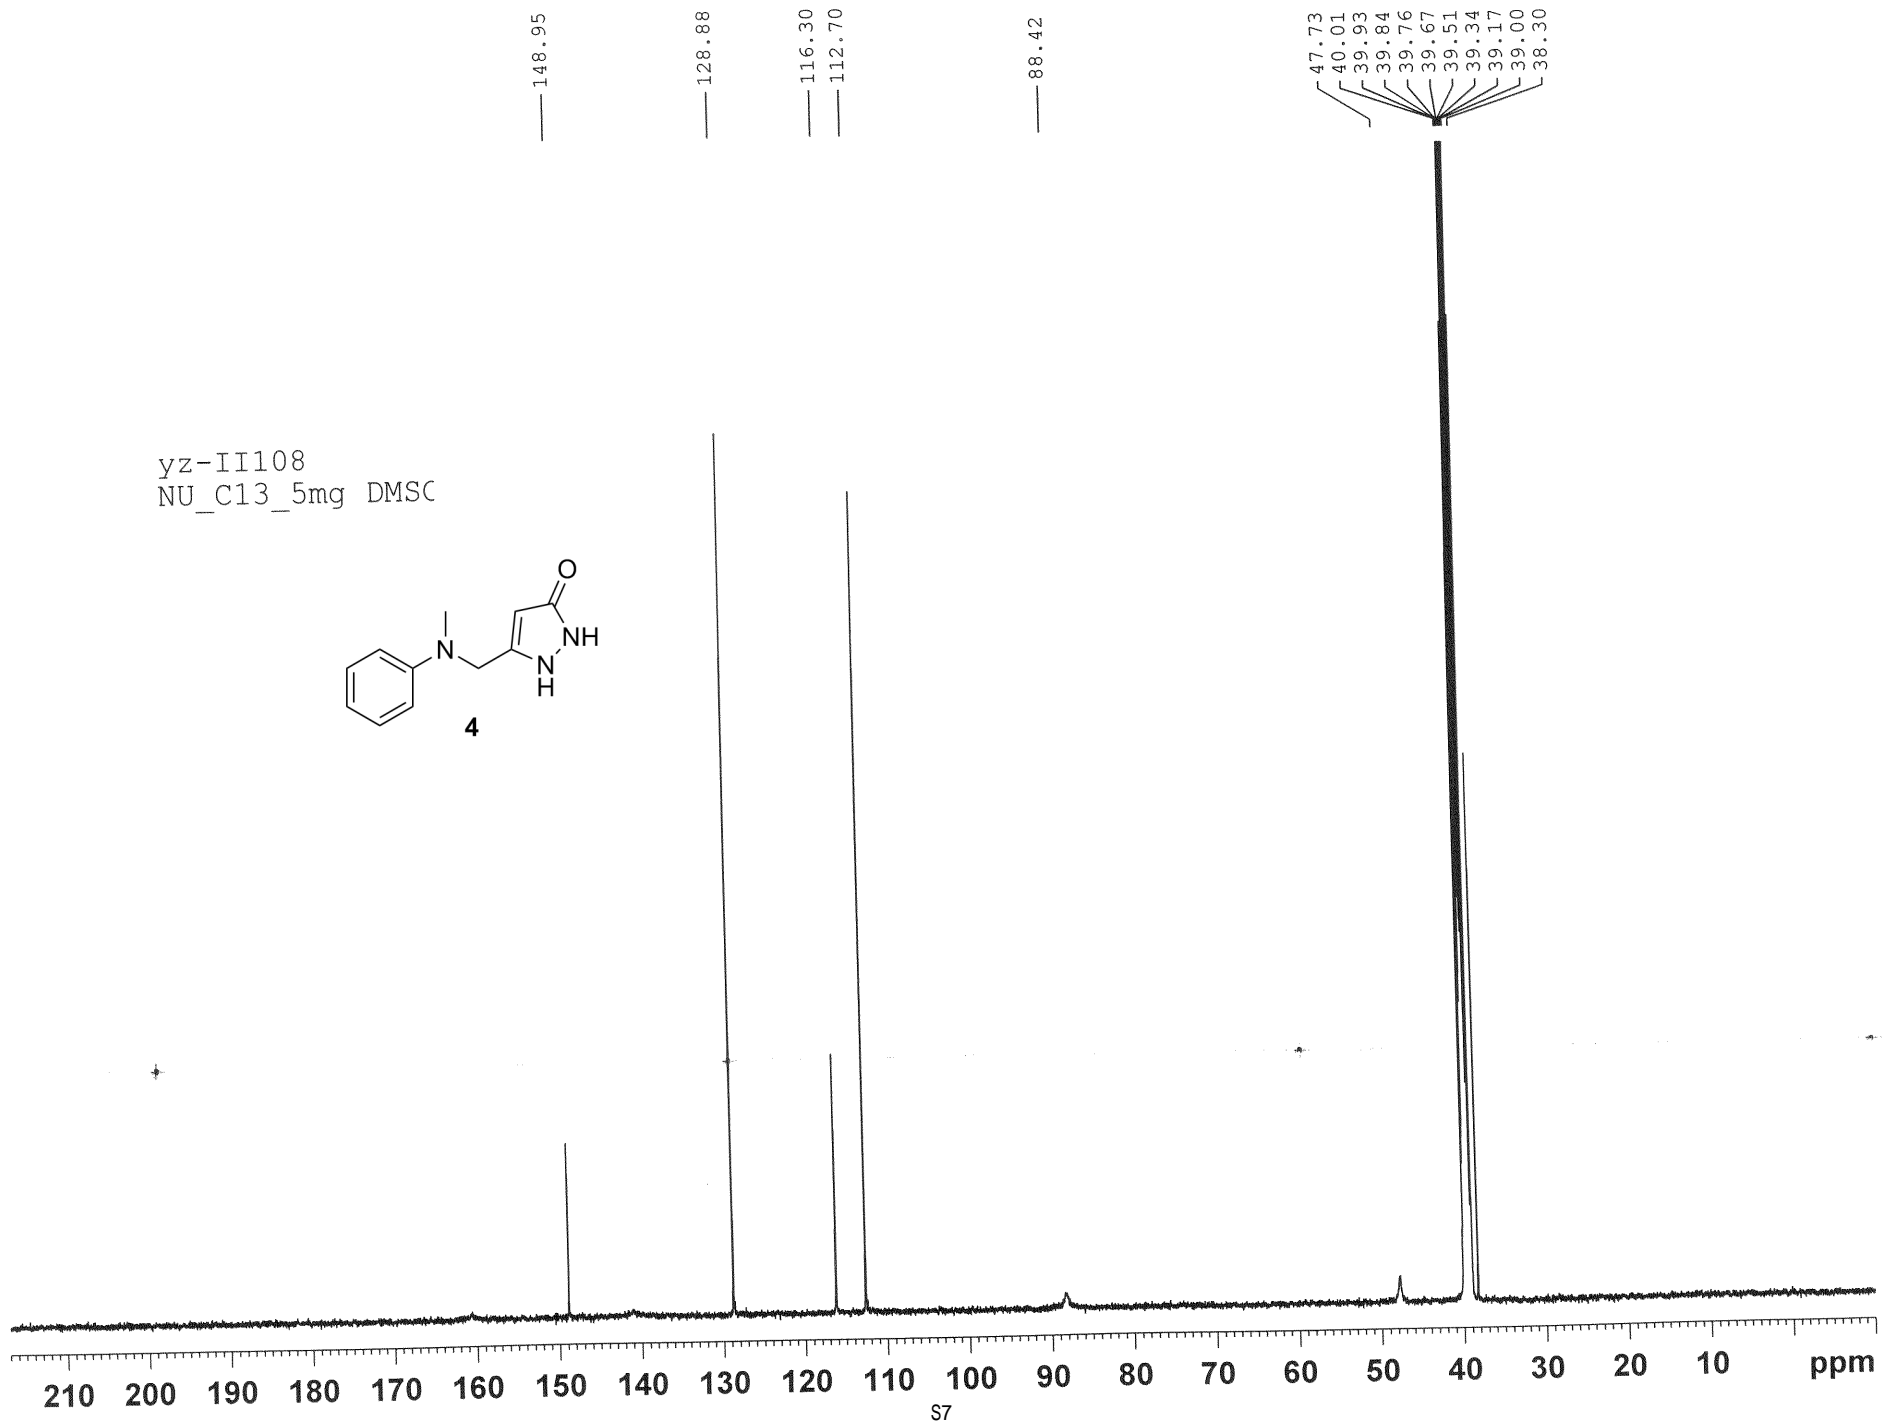

—11.467

—9.363

7.057  
 7.041  
 7.024  
 6.371  
 6.367  
 6.354  
 6.350  
 6.256  
 6.252  
 6.247  
 6.236  
 6.232  
 6.220  
 6.216  
 5.205  
 —4.334  
 —3.682  
 —3.338  
 2.891  
 2.503  
 2.500  
 2.497  
 2.493  
 2.490

yz-III121  
PROTON DMSO

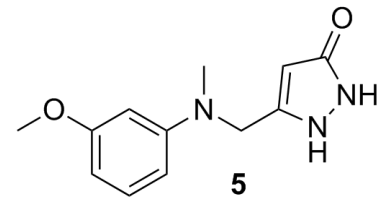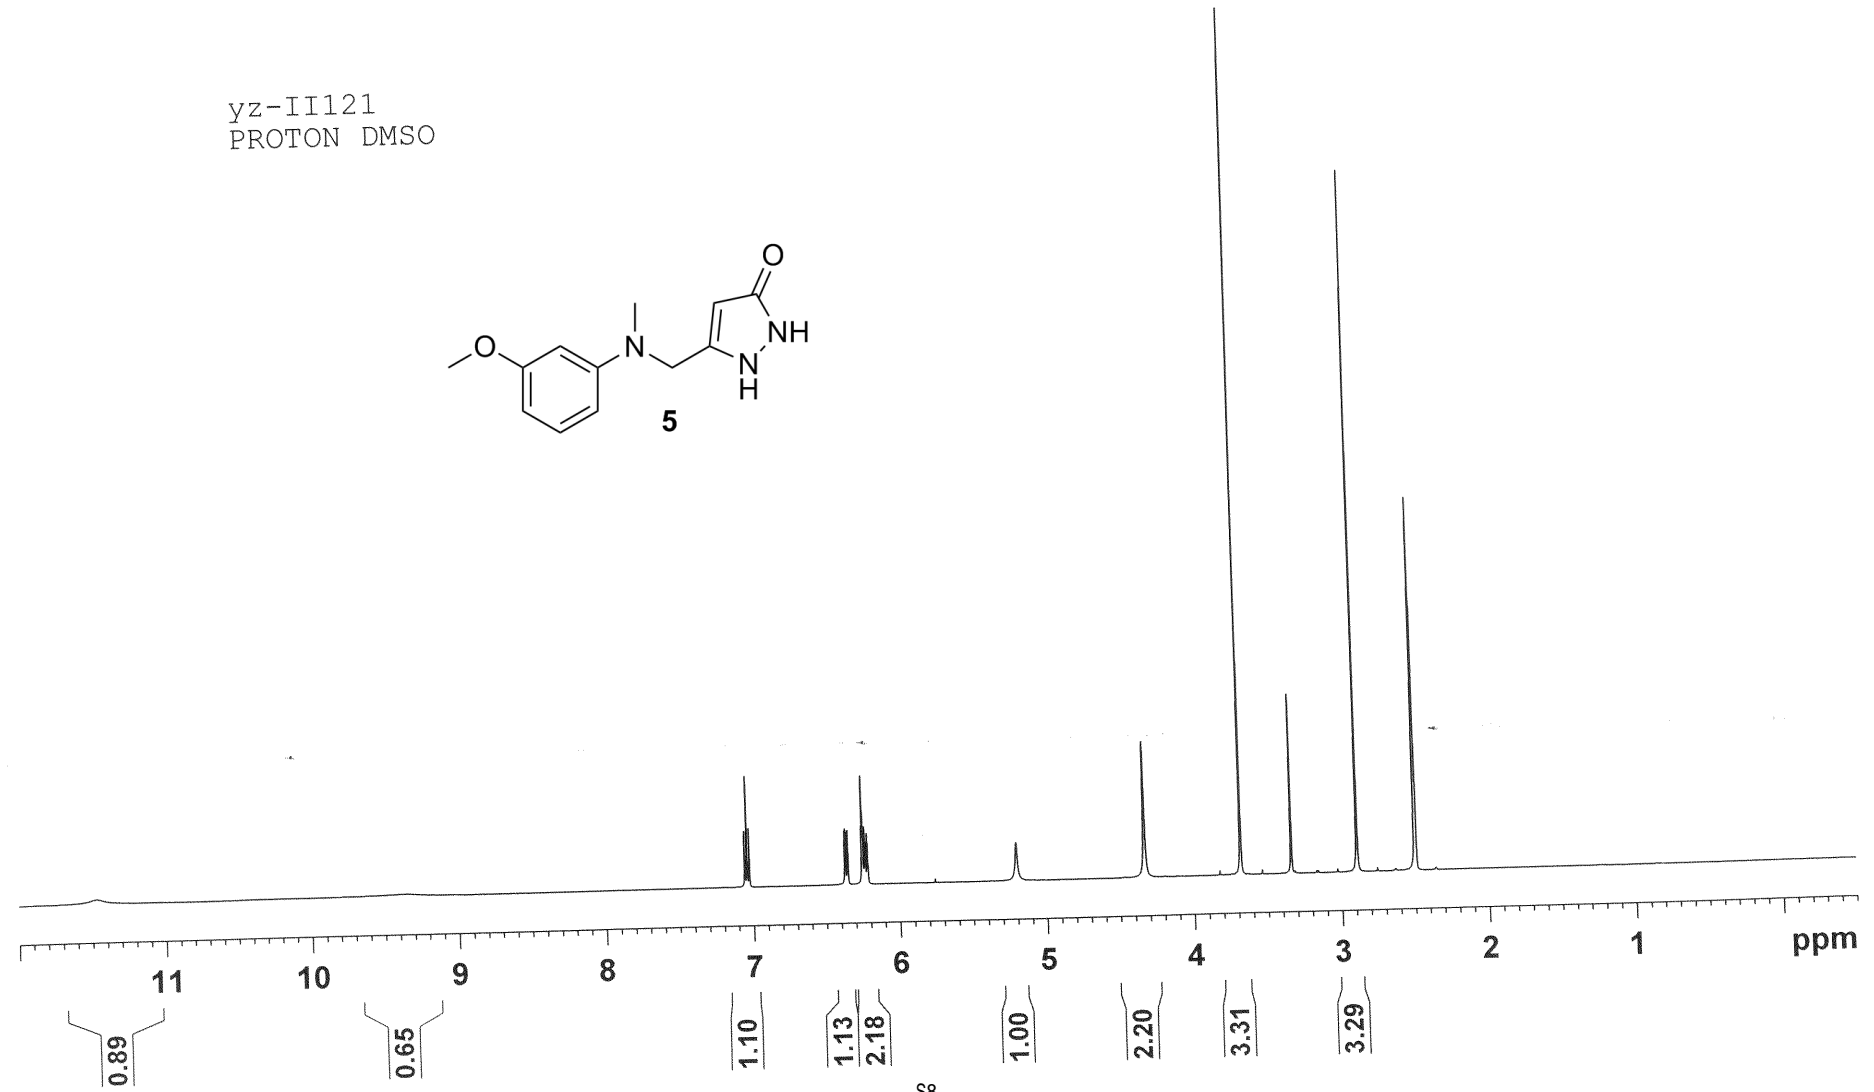



yz-III121  
NU\_C13\_2mg DMSO

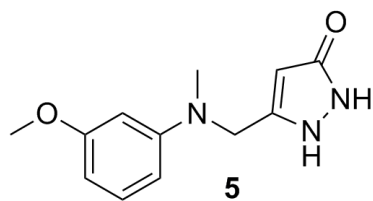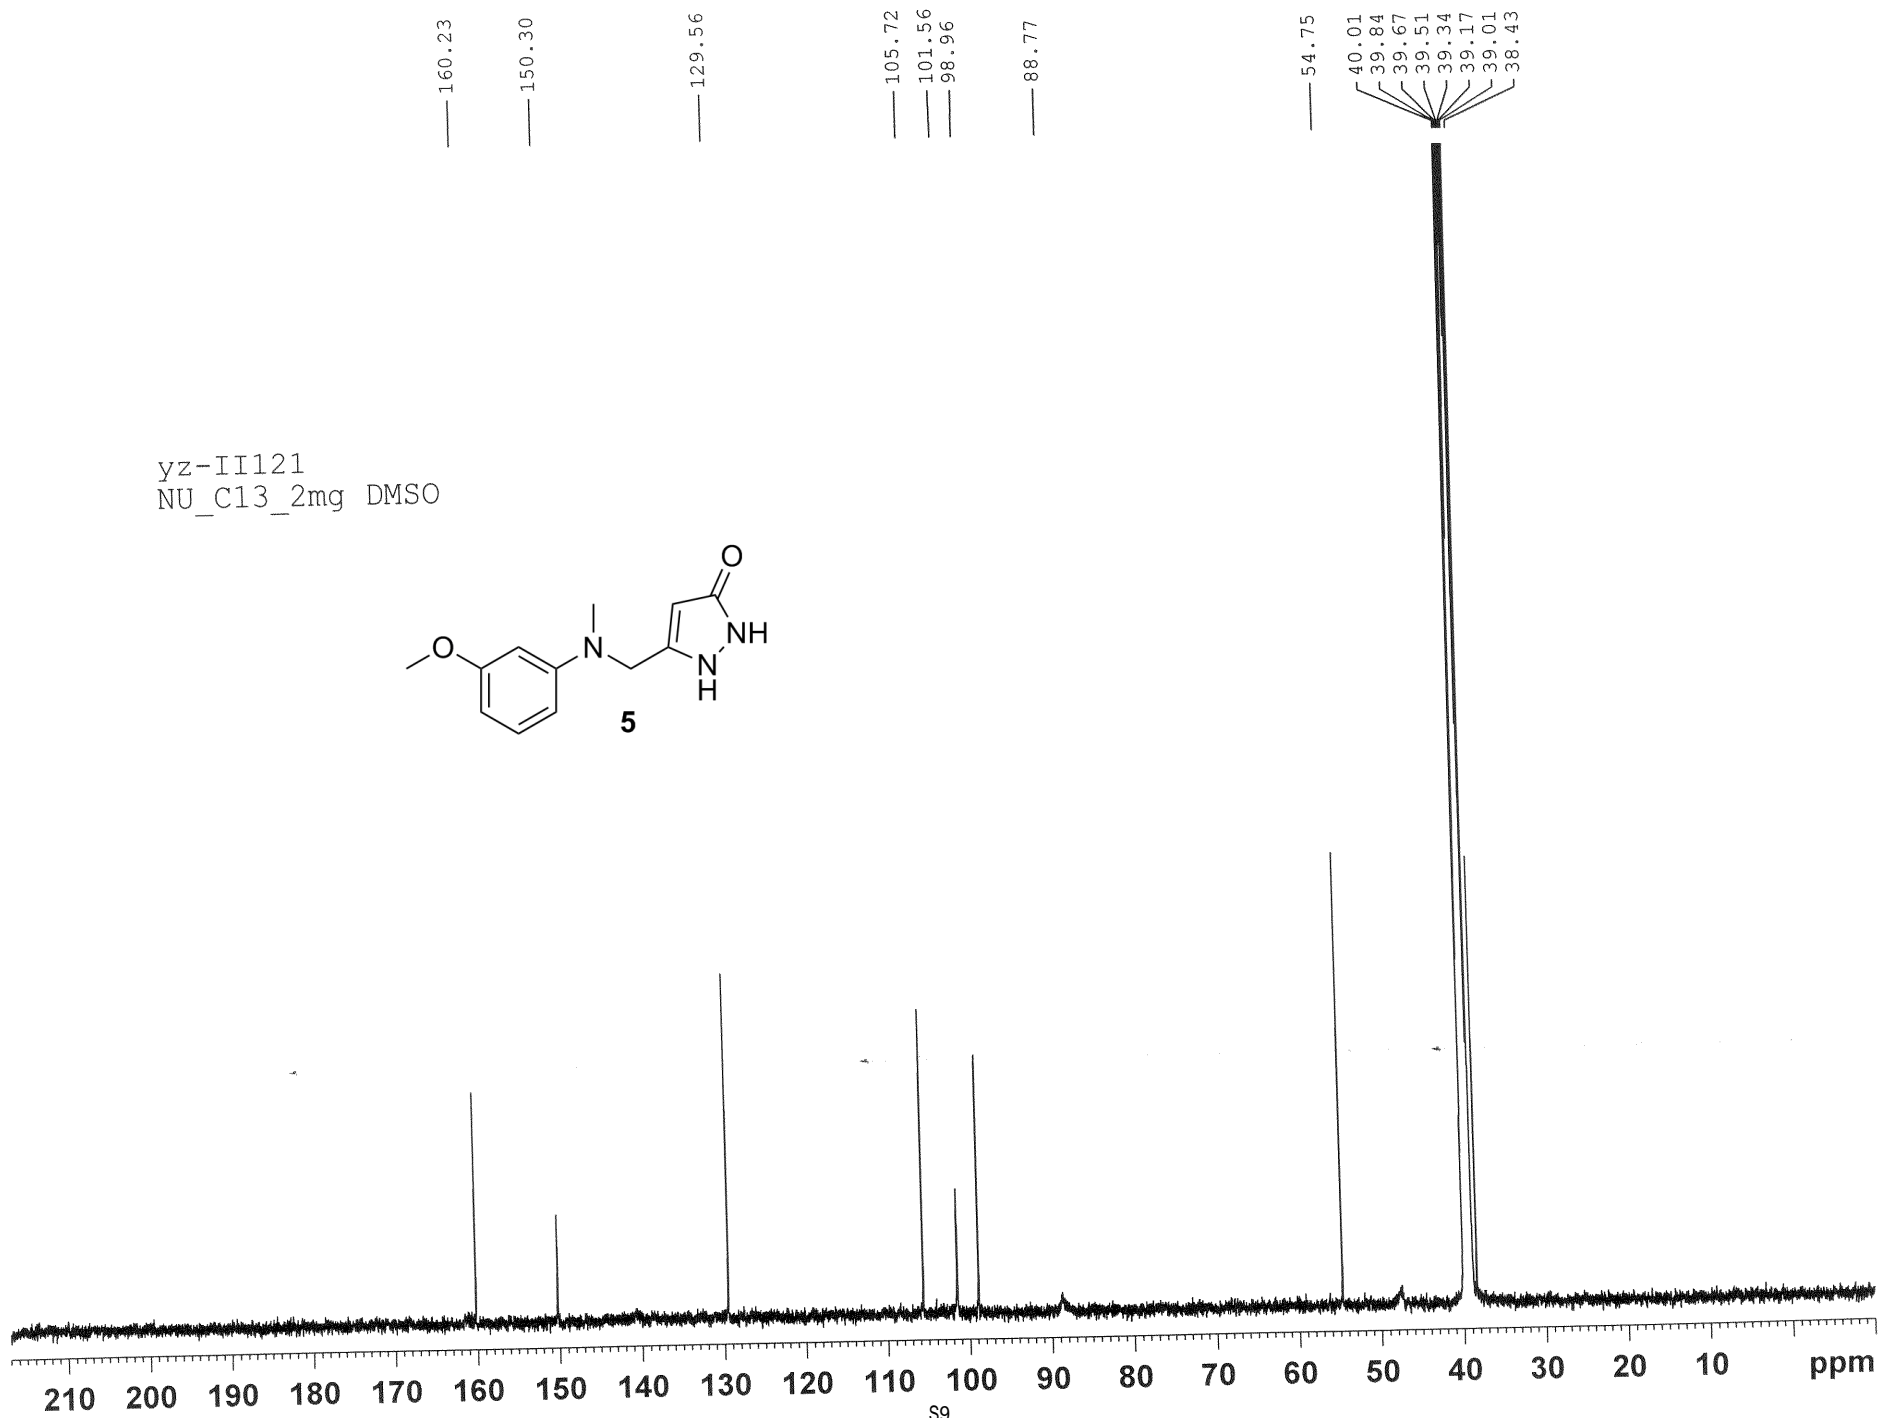

7.541  
7.523

6.833  
6.815

5.254

4.467

3.347

3.037

2.500

yz-III150  
PROTON DMSO

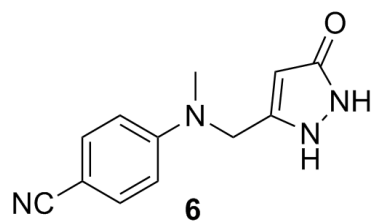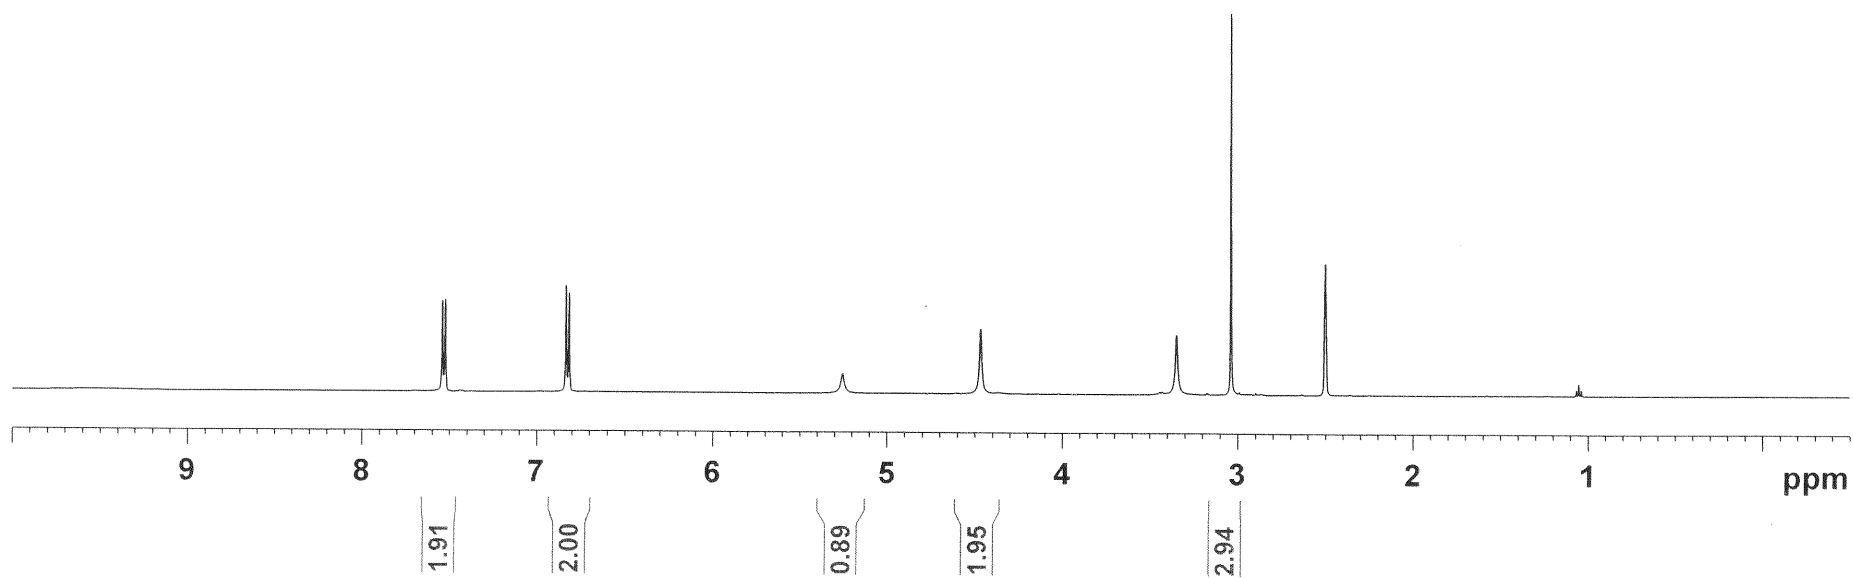

yz-III150  
NU\_C13\_5mg DMSO

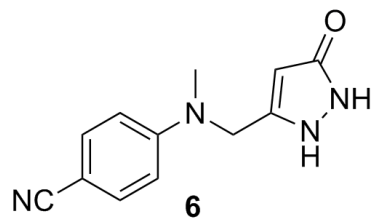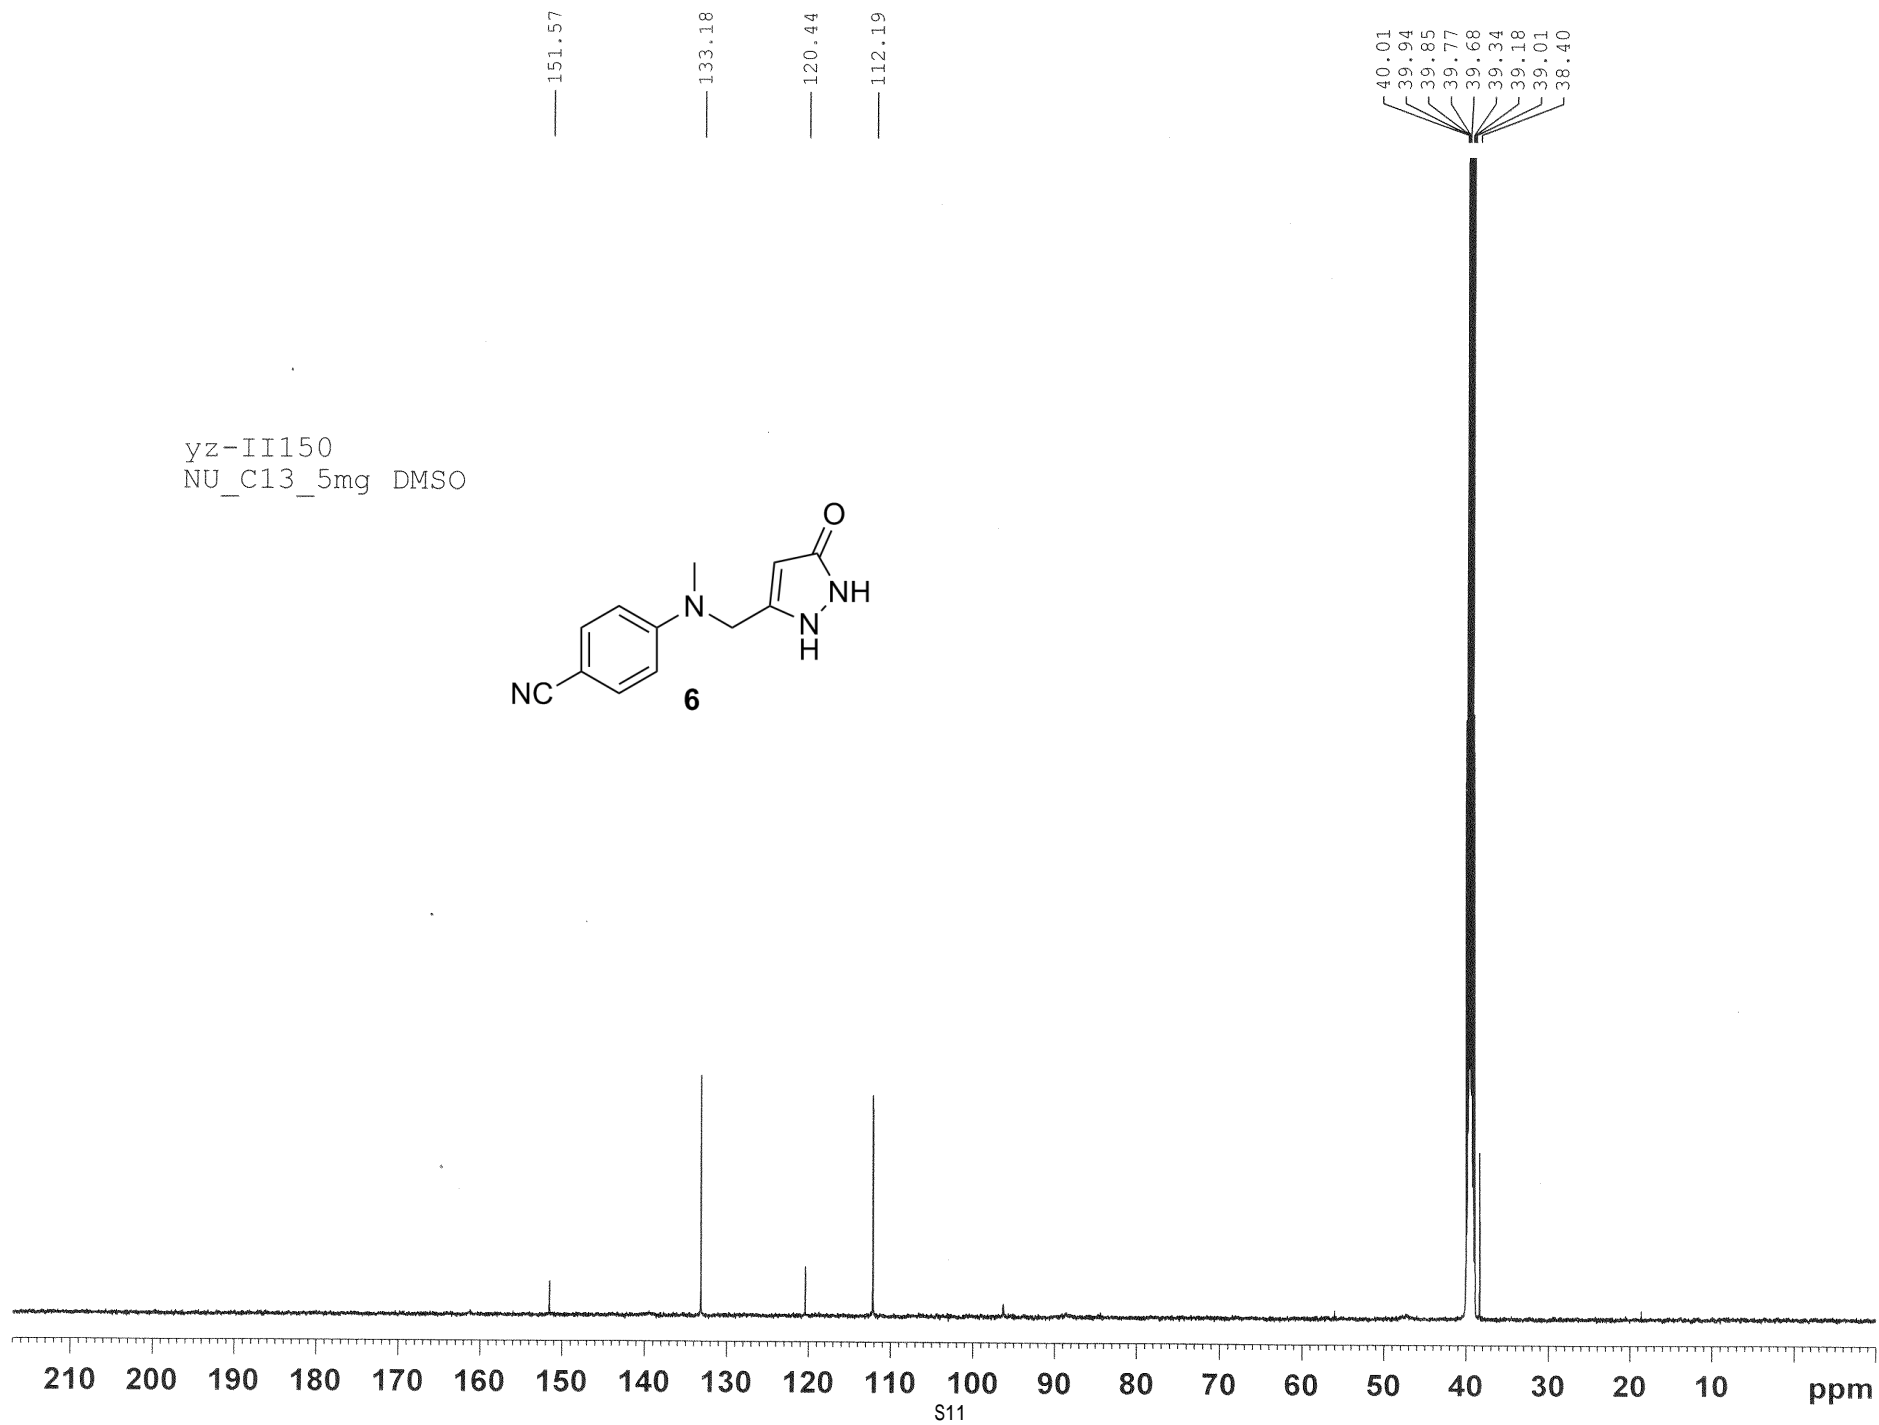

— 11.468

— 9.336

7.008  
6.990  
6.972  
6.769  
6.763  
6.760  
6.755  
6.750  
6.746  
6.741

— 5.205

— 4.321

— 2.862

yz-III127  
PROTON DMSO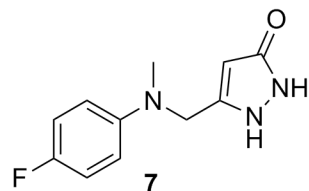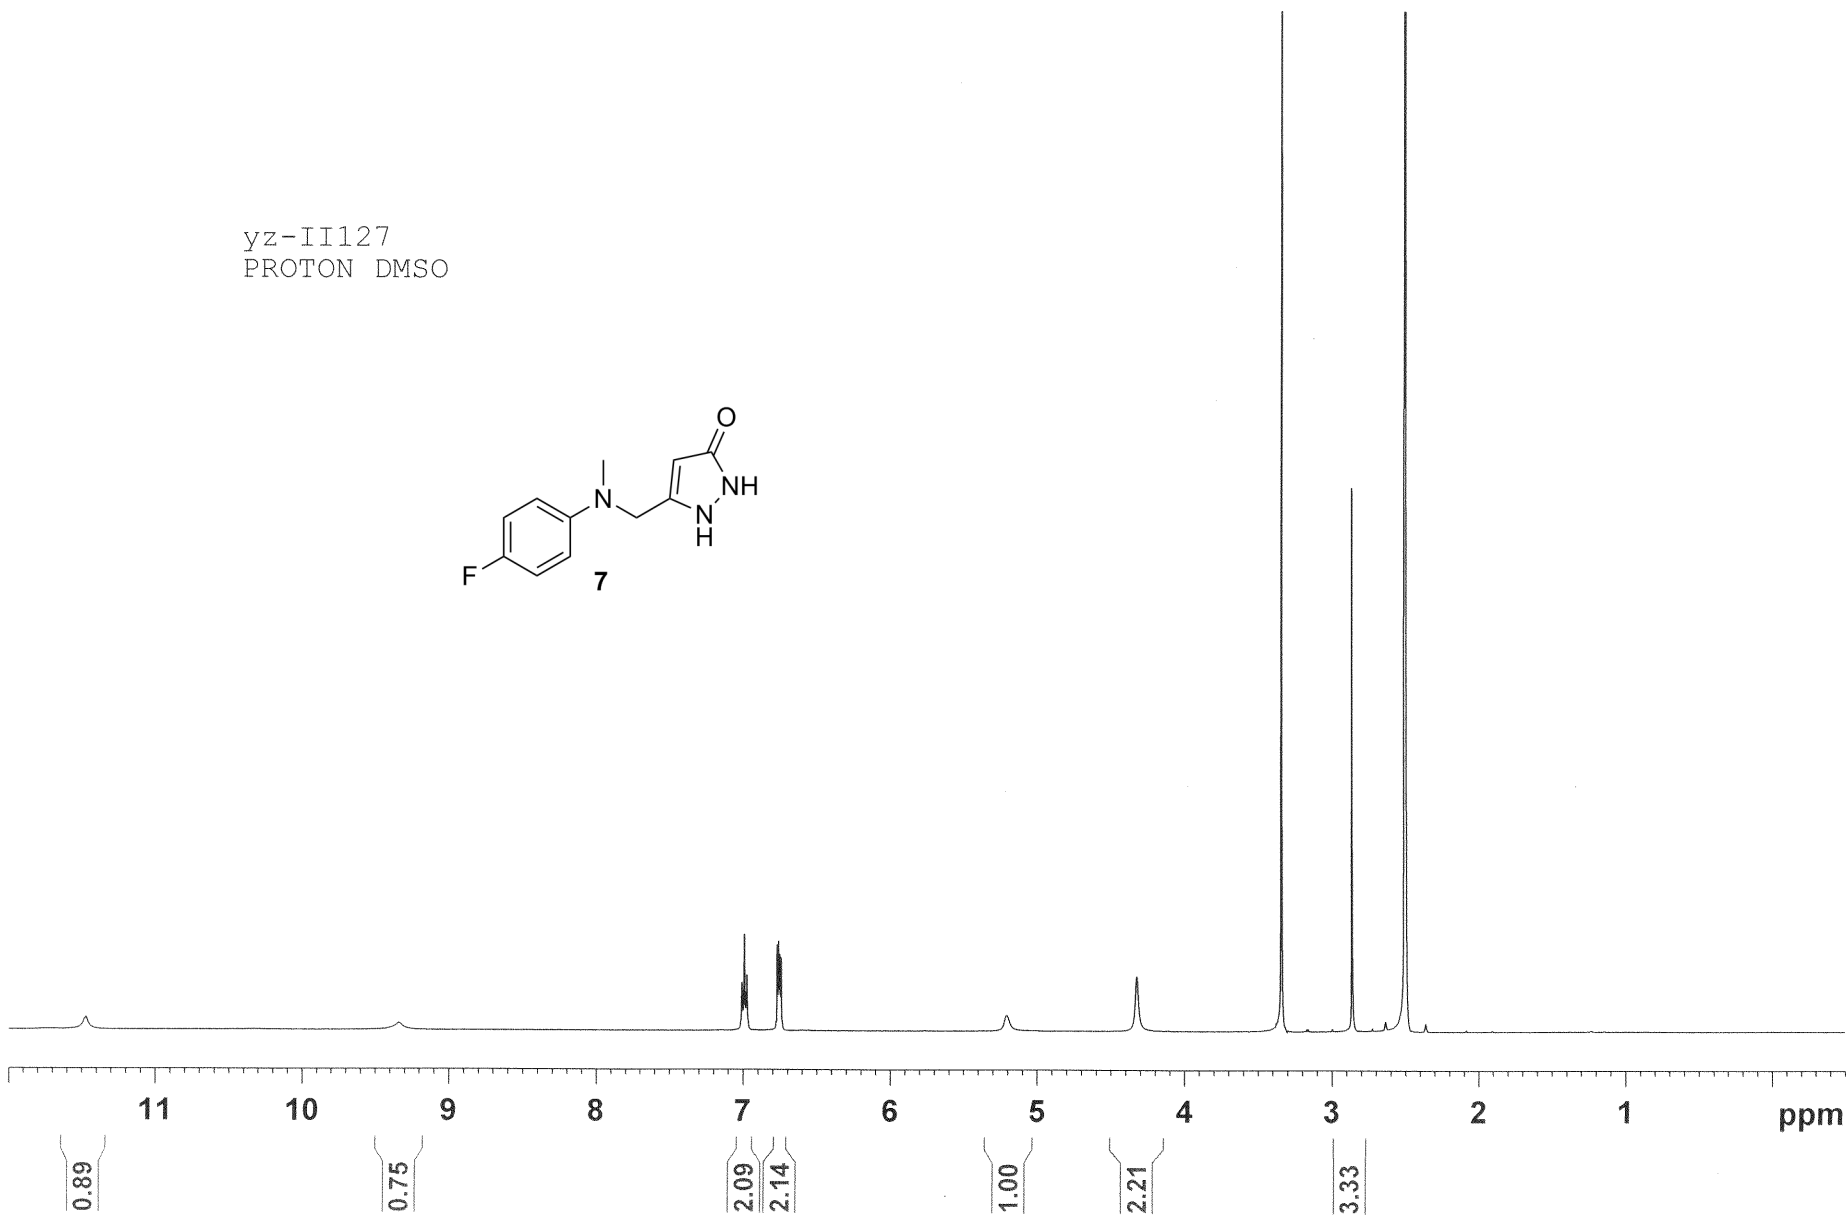

yz-III126  
NU\_C13\_2mg DMSO

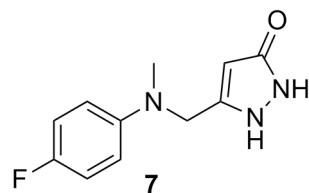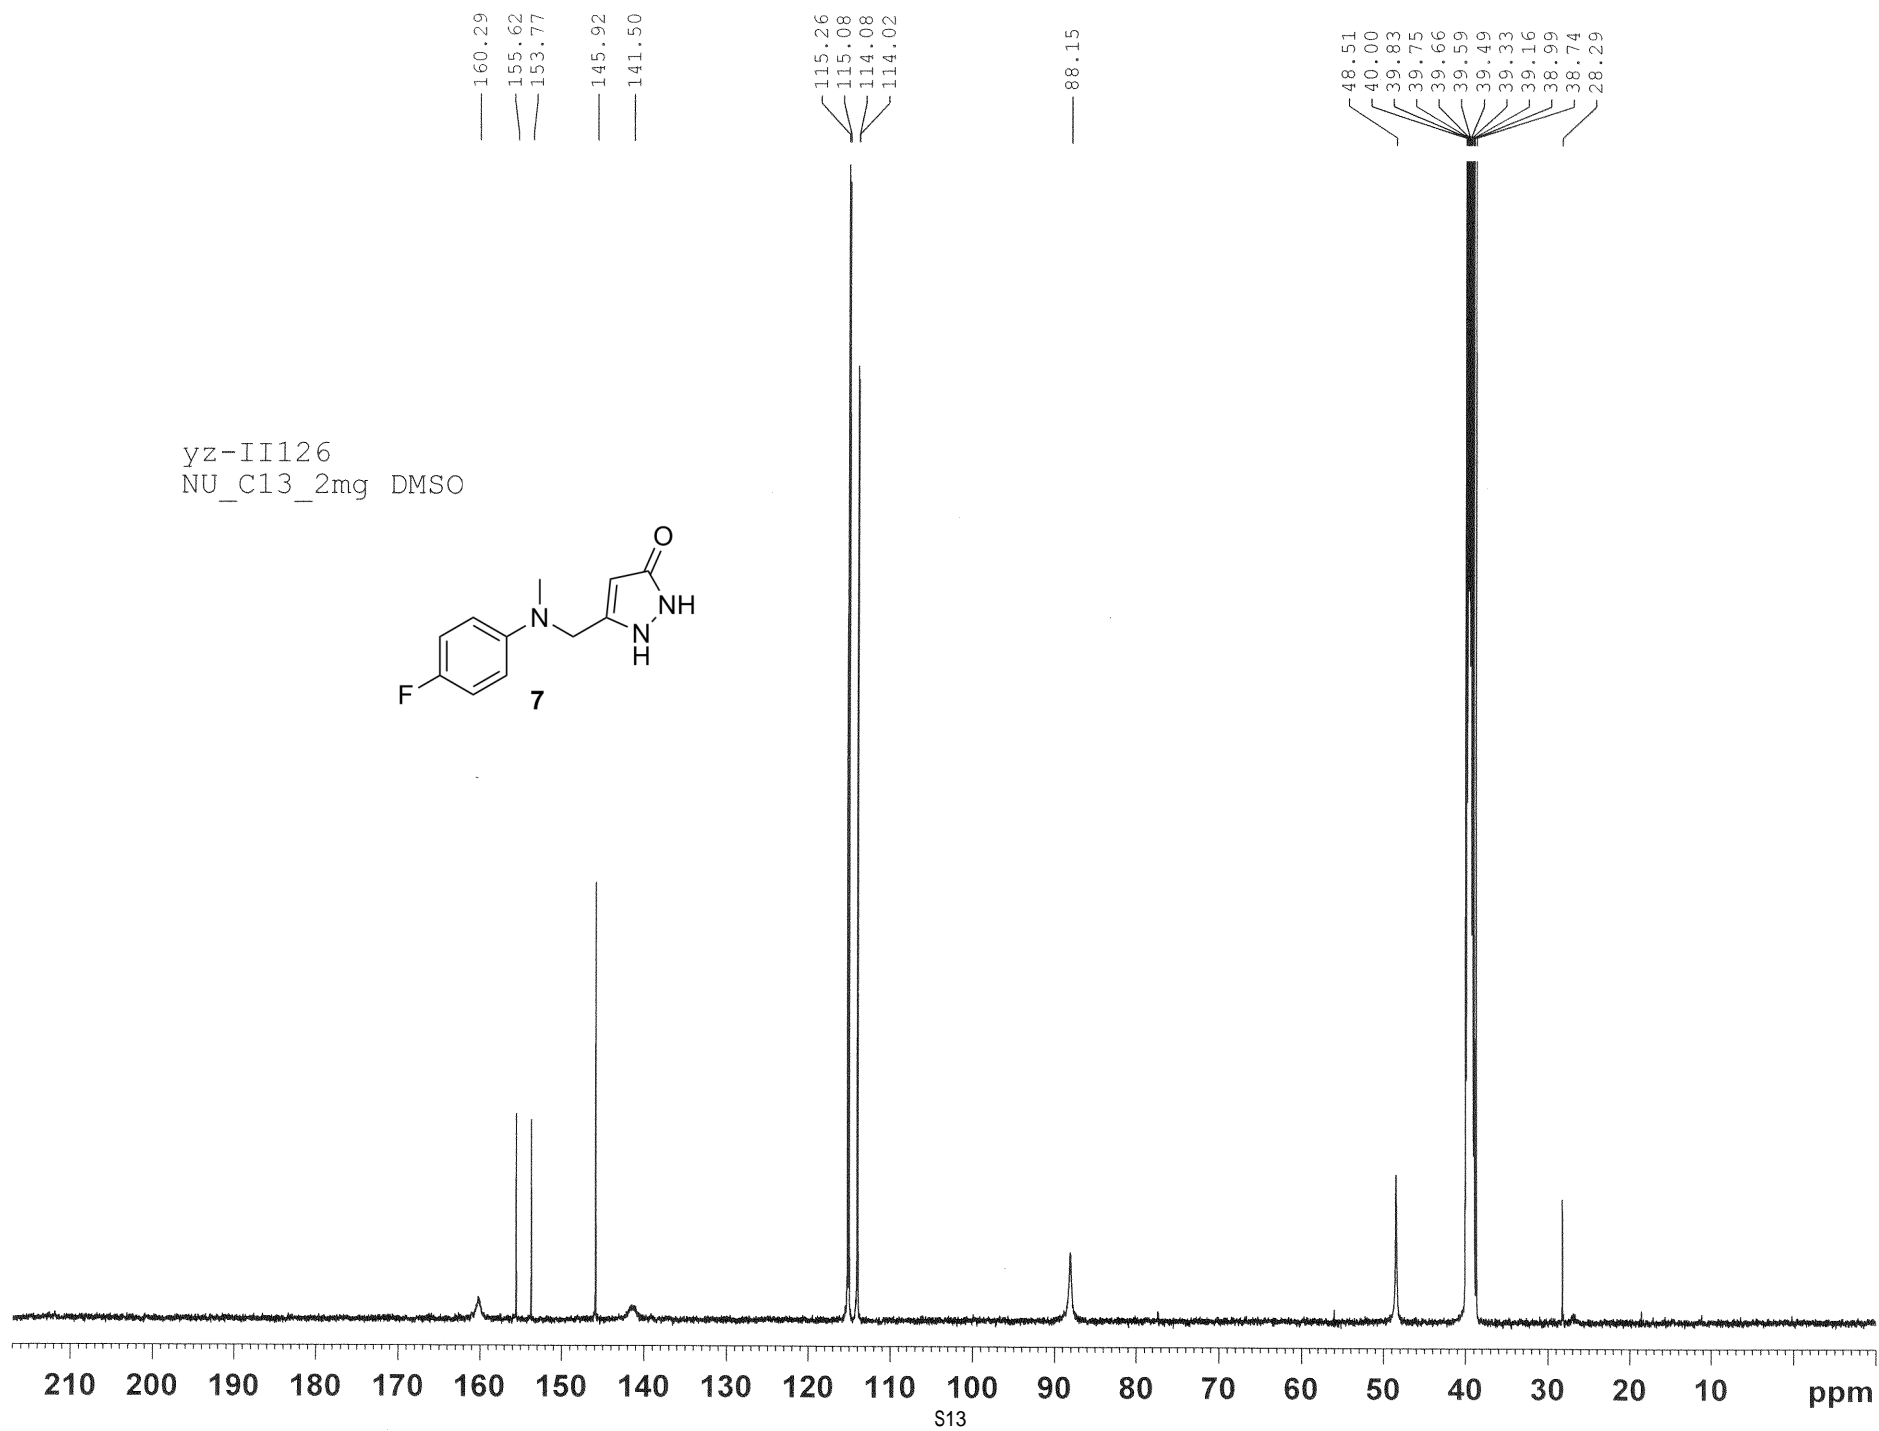

7.169  
7.152  
6.761  
6.744

5.201

4.355

3.355

2.903

2.500

yz-III126  
PROTON DMSO

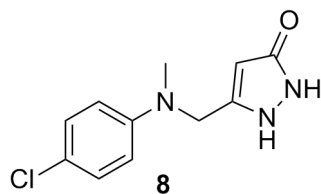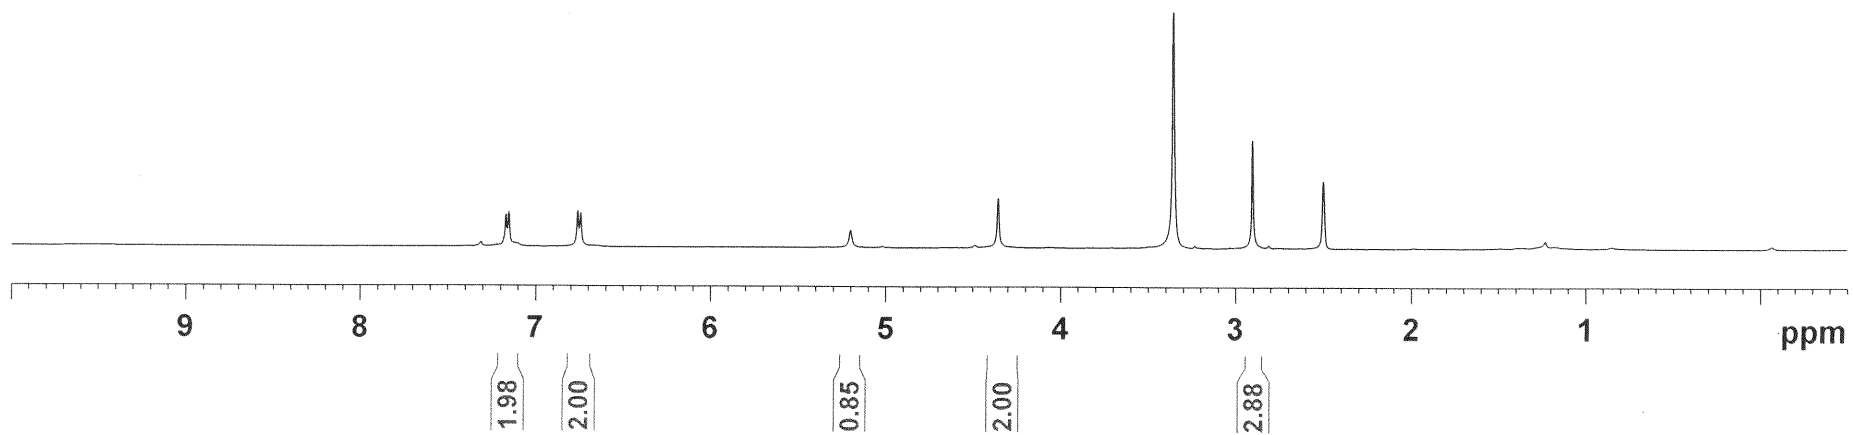

yz-III126  
NU\_C13\_5mg DMSO

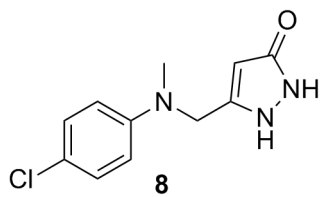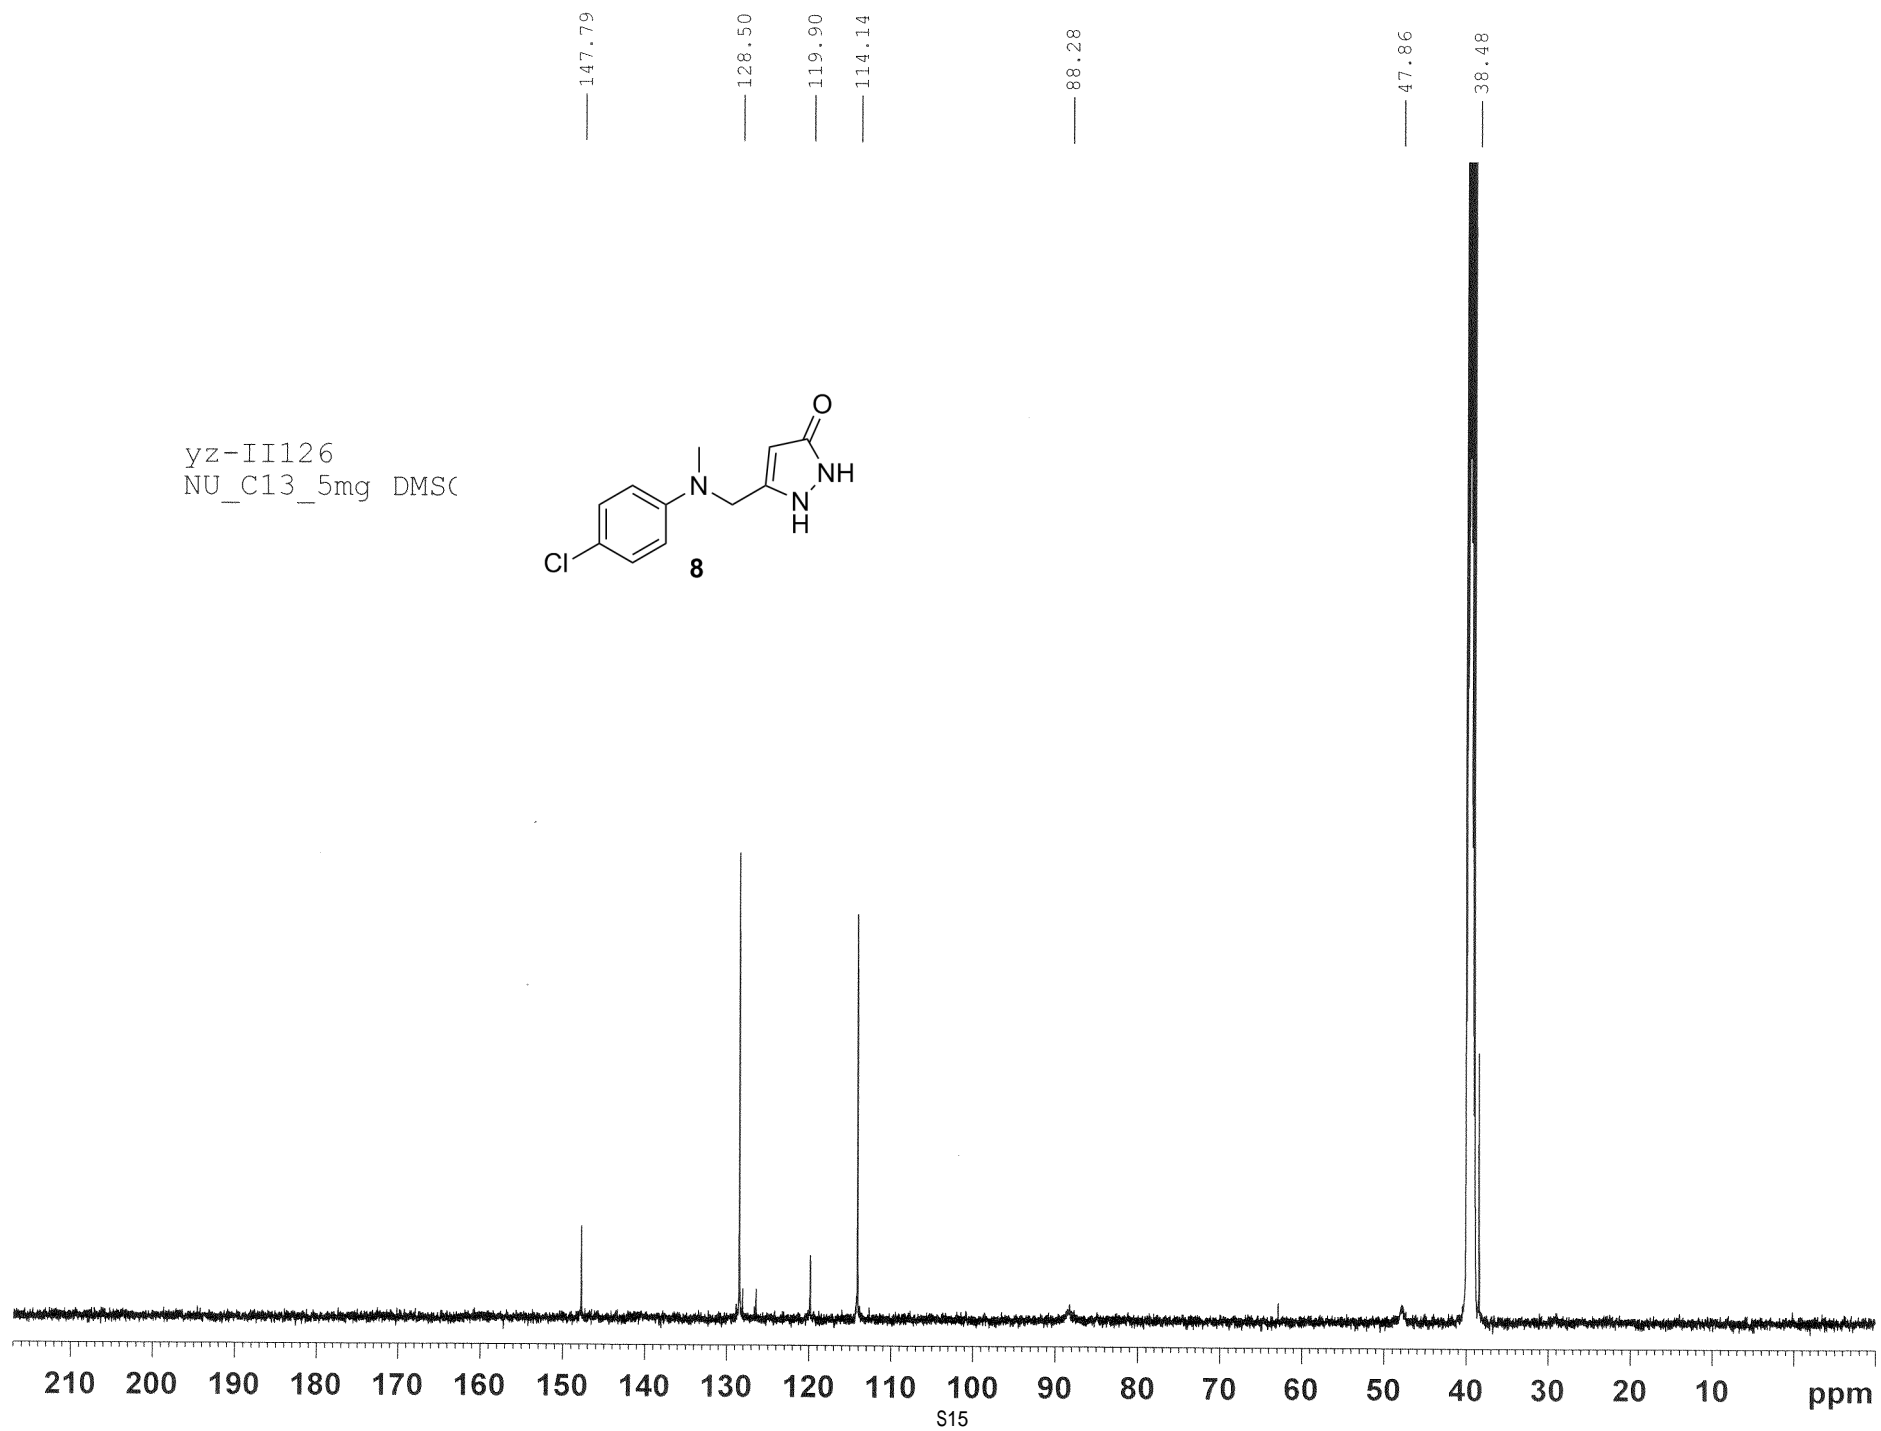

7.282  
7.265  
6.716  
6.699  
5.208  
4.355  
2.900  
2.500

yz-III130  
PROTON DMSO

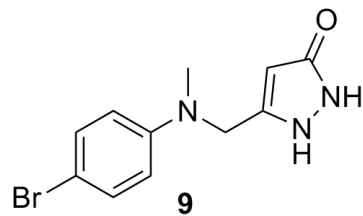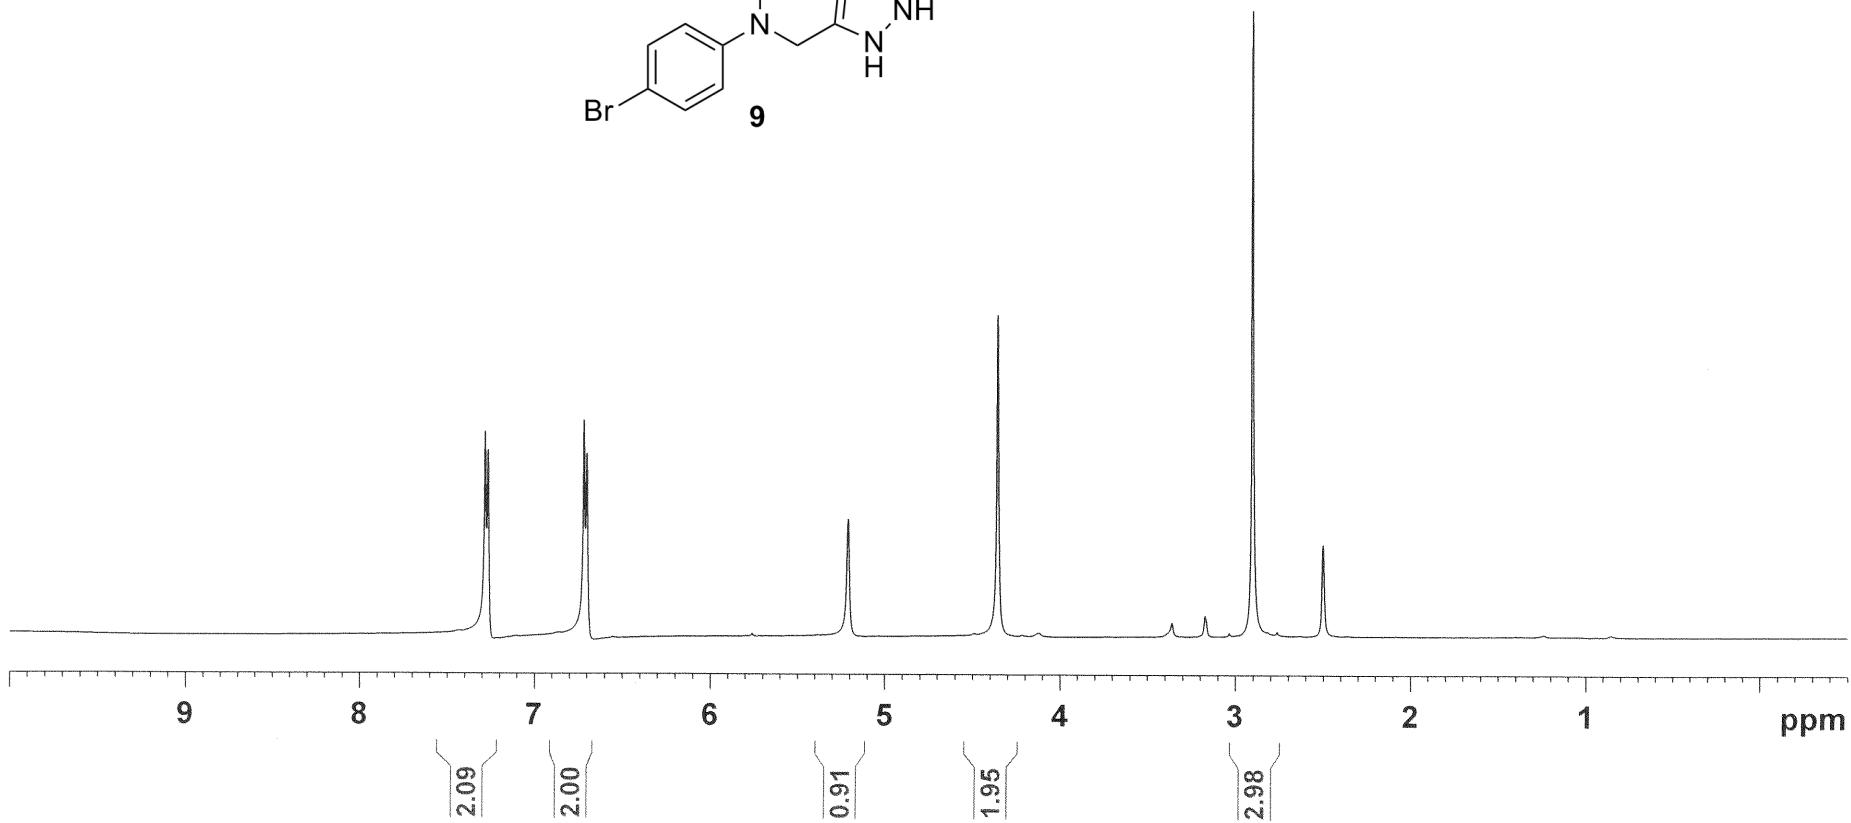



yz-III130  
NU\_C13\_5mg DMSO

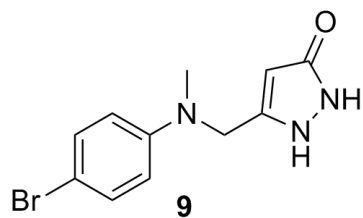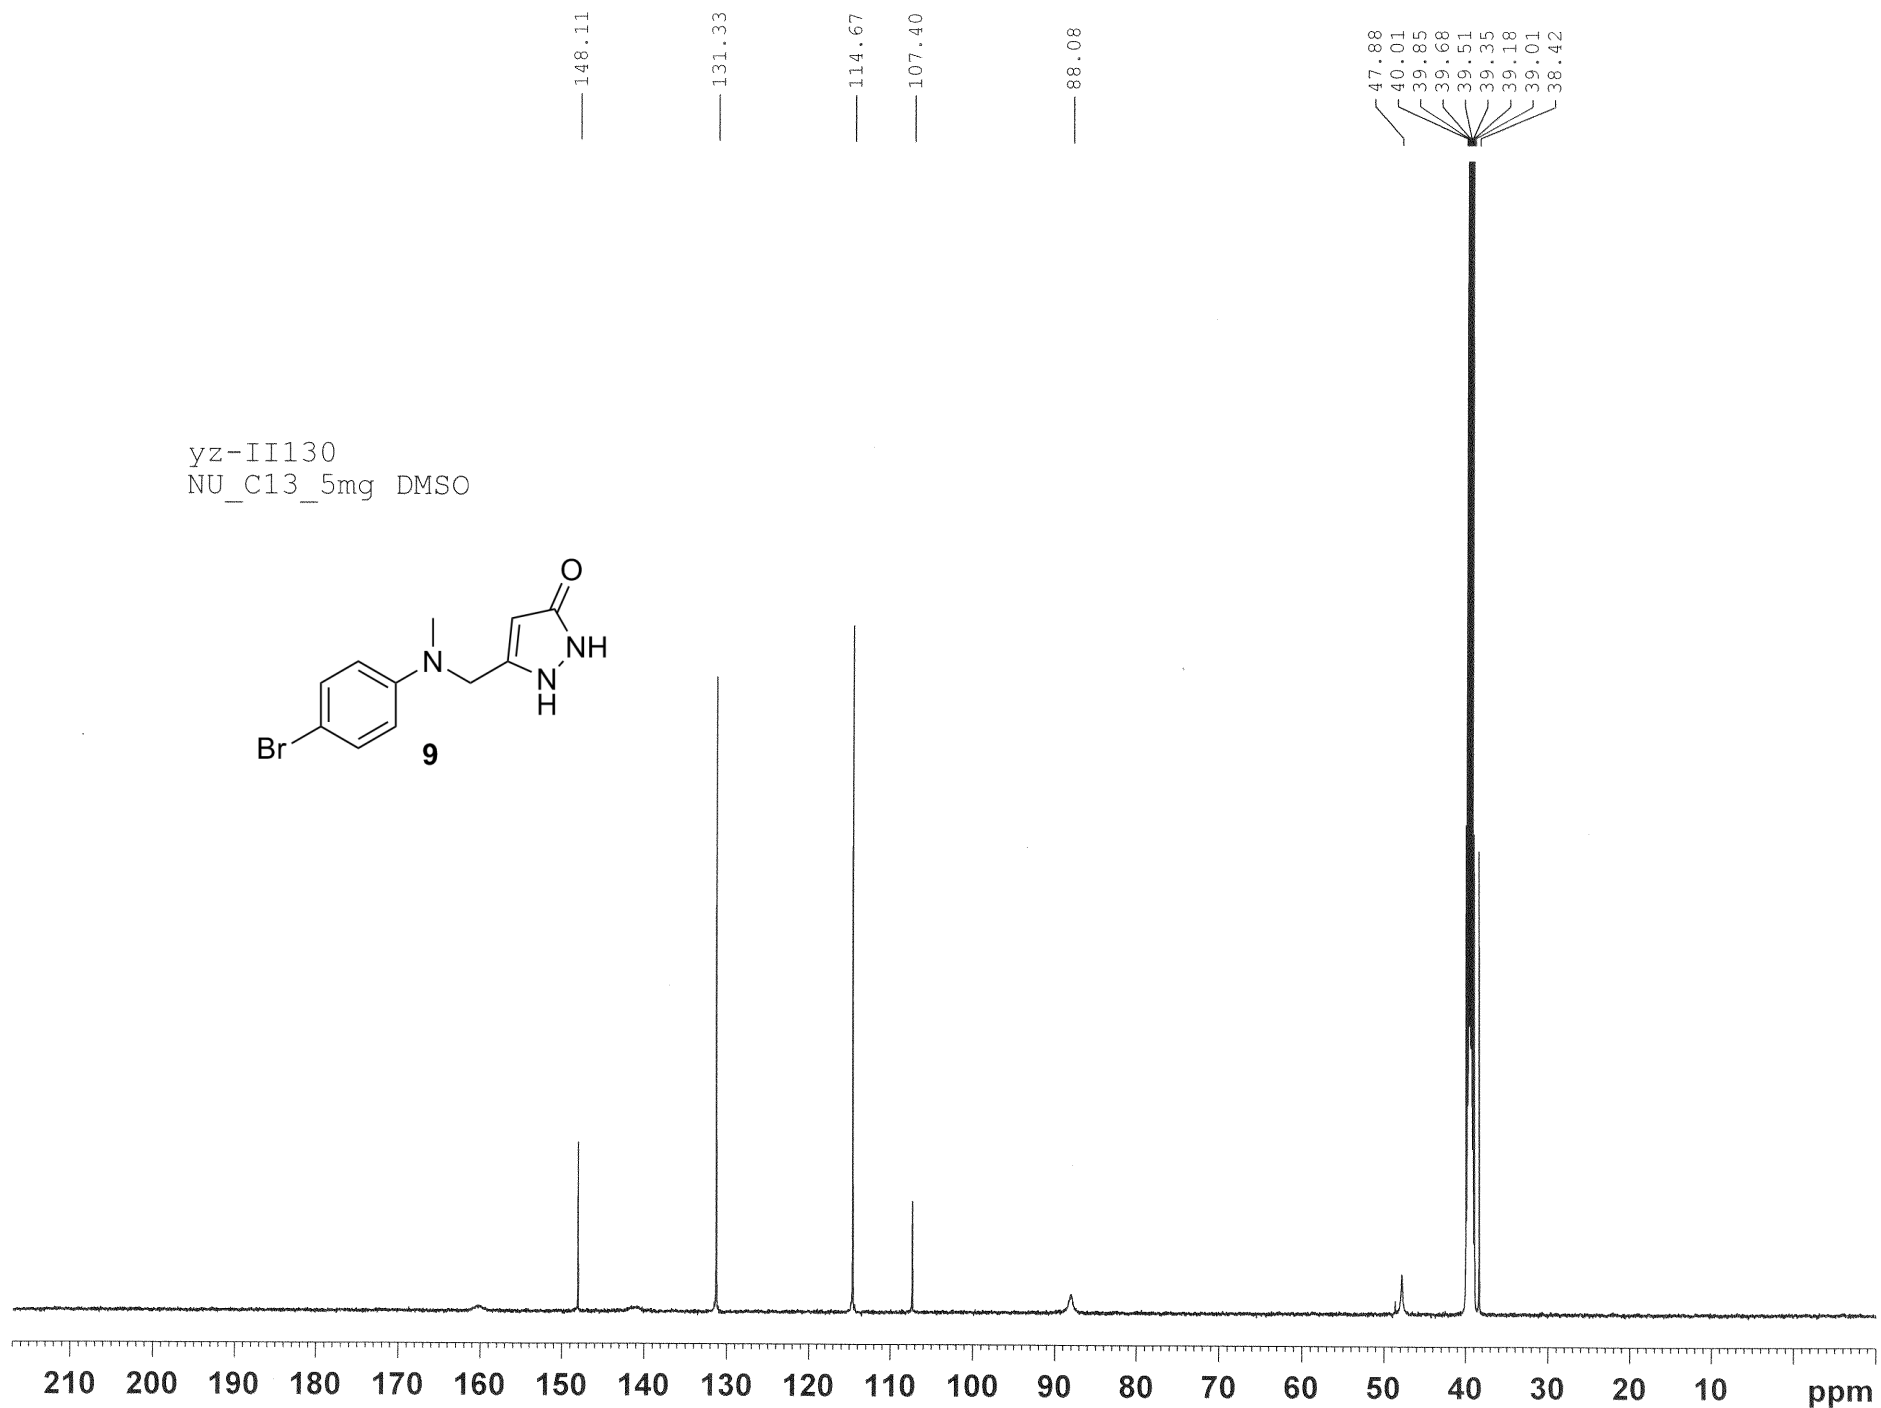

—11.507

—9.453

7.098  
7.082  
7.066  
6.863  
6.772  
6.758  
6.742  
6.737

—5.218

—4.374

—3.344

—2.928

—2.500

yz-III138  
PROTON DMSO

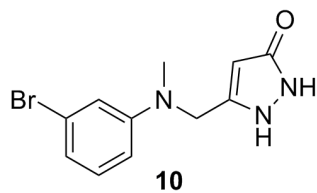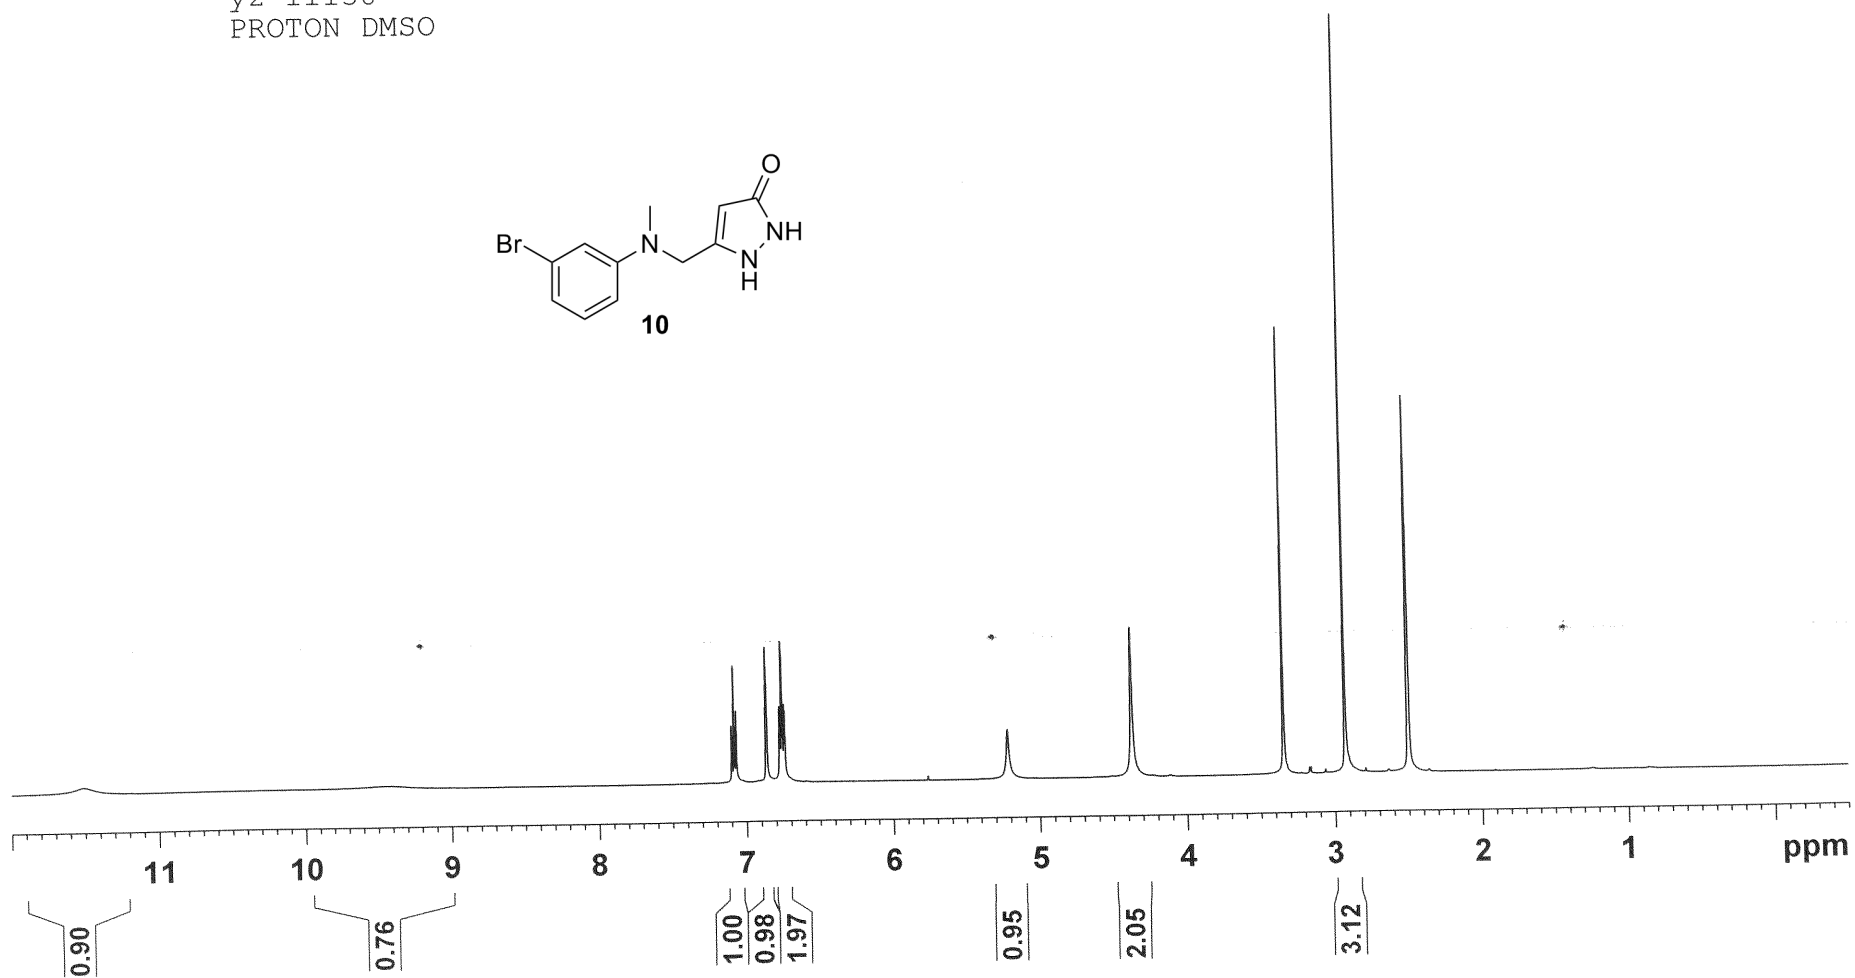

yz-III138  
NU\_C13\_5mg DMSC

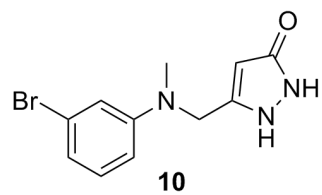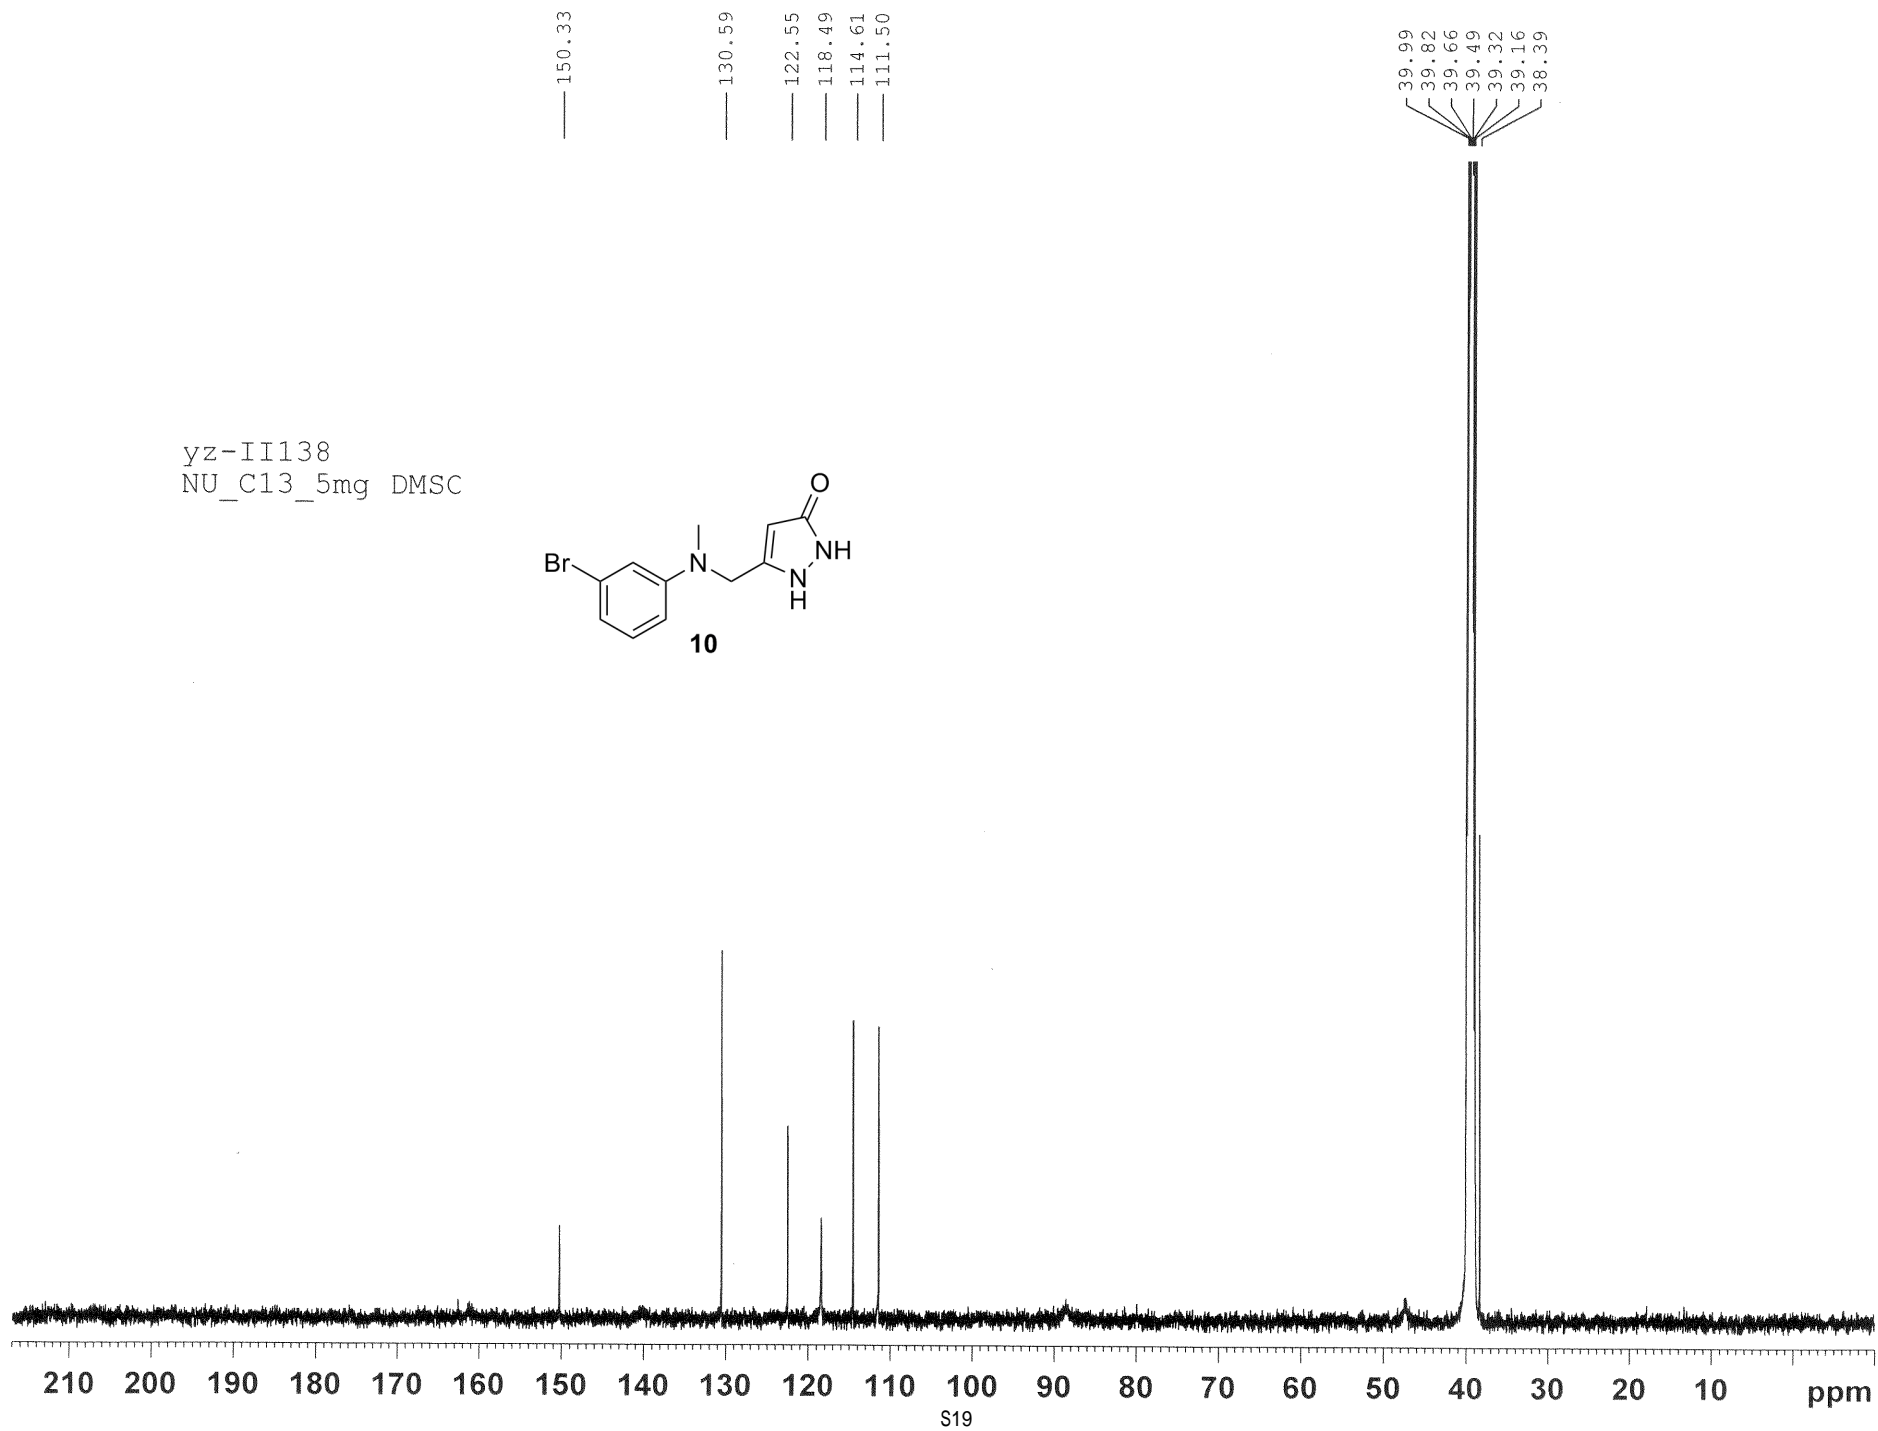

7.598  
7.596  
7.582  
7.580  
7.322  
7.319  
7.306  
7.305  
7.291  
7.289  
7.145  
7.143  
7.129  
7.127  
6.983  
6.980  
6.967  
6.965  
6.952  
6.950  
5.241

4.022

3.343

2.624  
2.503  
2.500  
2.497

yz-III145  
PROTON DMSO

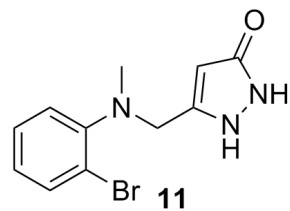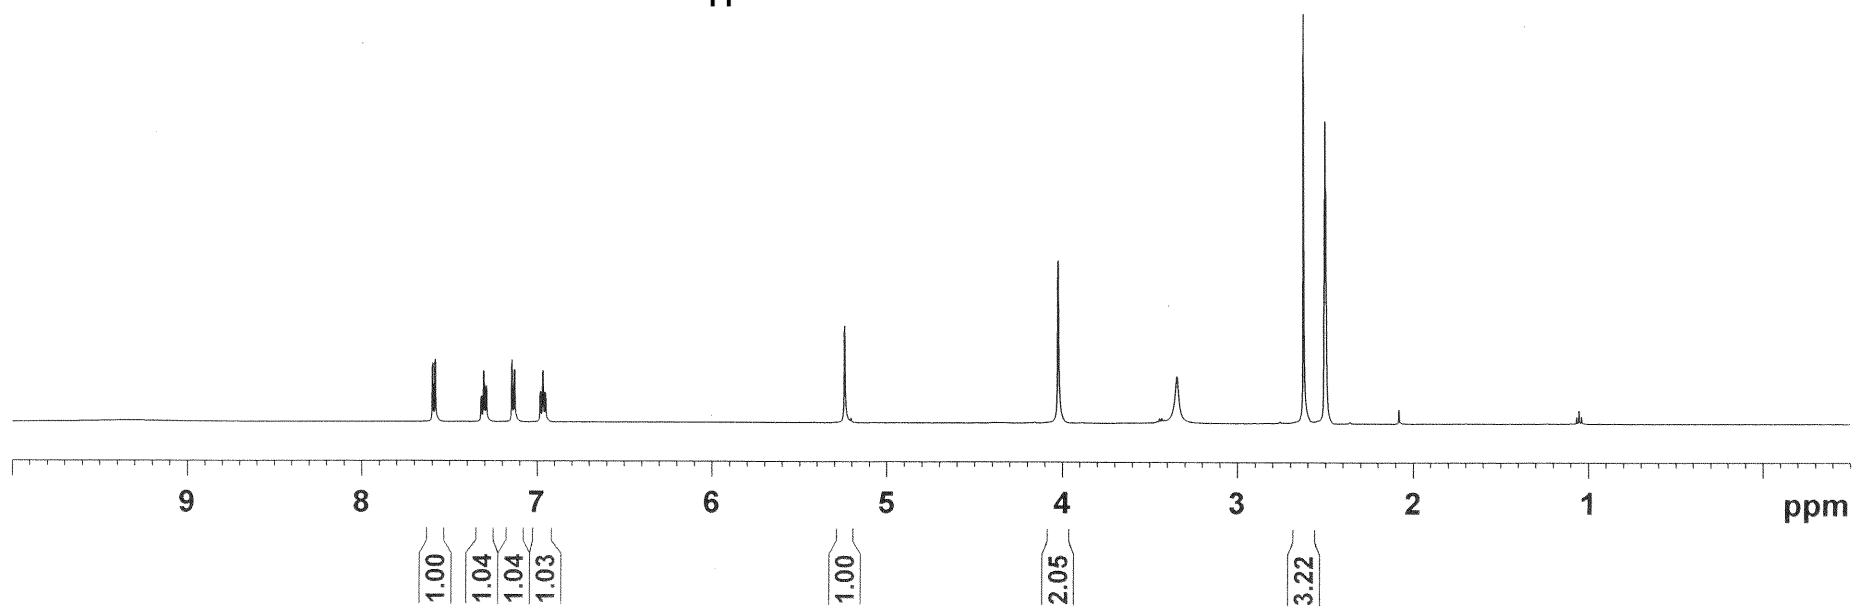

yz-III145  
NU\_C13\_5mg DMSC

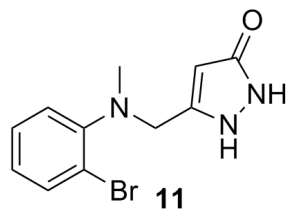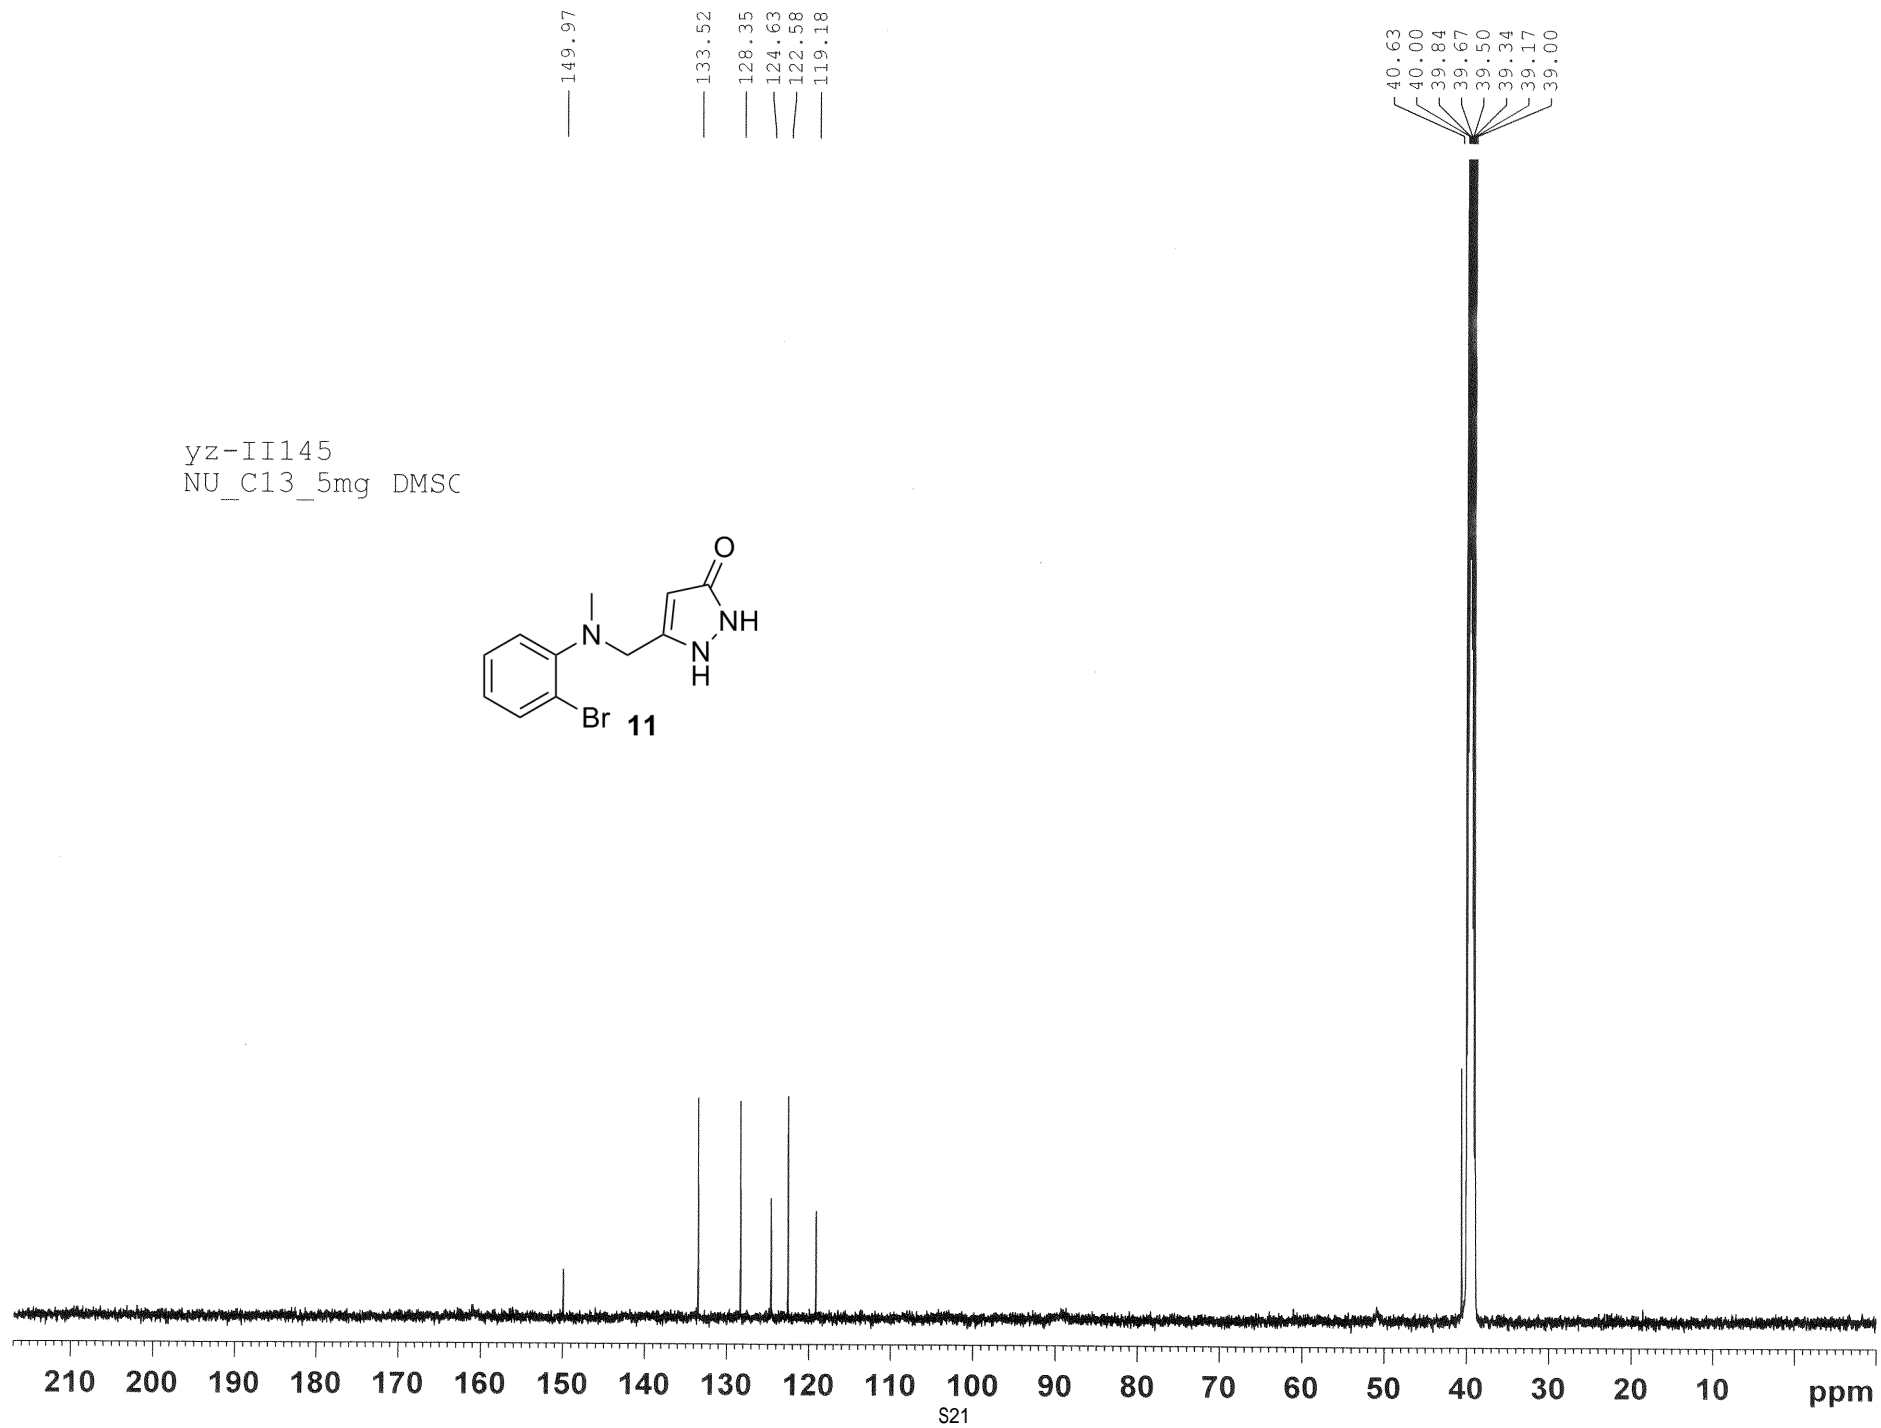

7.718  
7.700  
7.682  
7.650  
7.633  
7.349  
7.347  
7.333  
7.319  
7.316  
7.305  
7.300  
7.287  
7.282  
7.183  
7.181  
7.167  
7.153  
7.151  
6.976  
6.972  
— 5.210  
— 4.489  
— 3.344  
— 2.999  
2.504  
2.500  
2.497

yz-III153  
PROTON DMSO

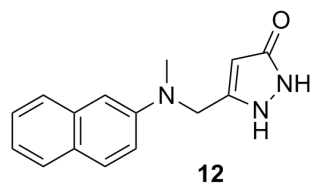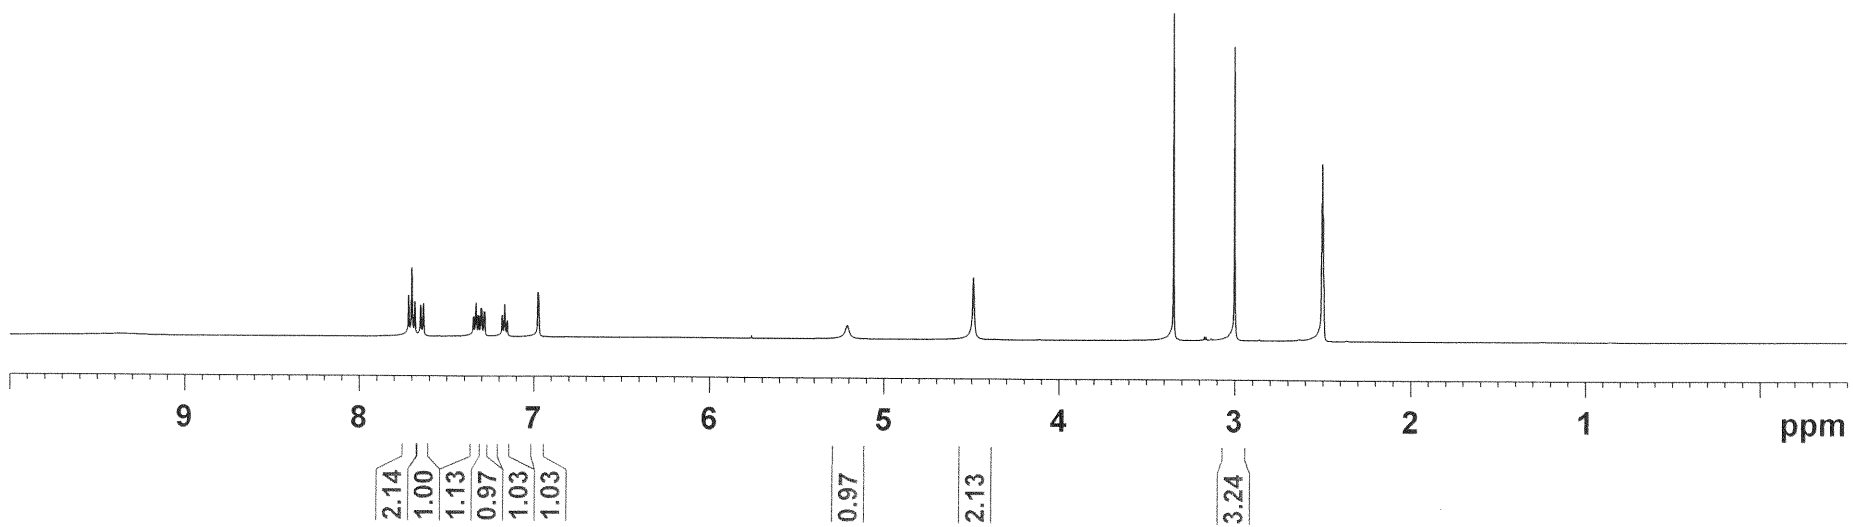

yz-III153  
NU\_C13\_2mg DMSC

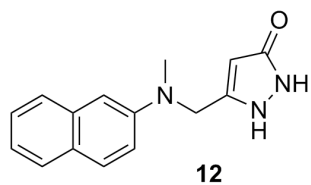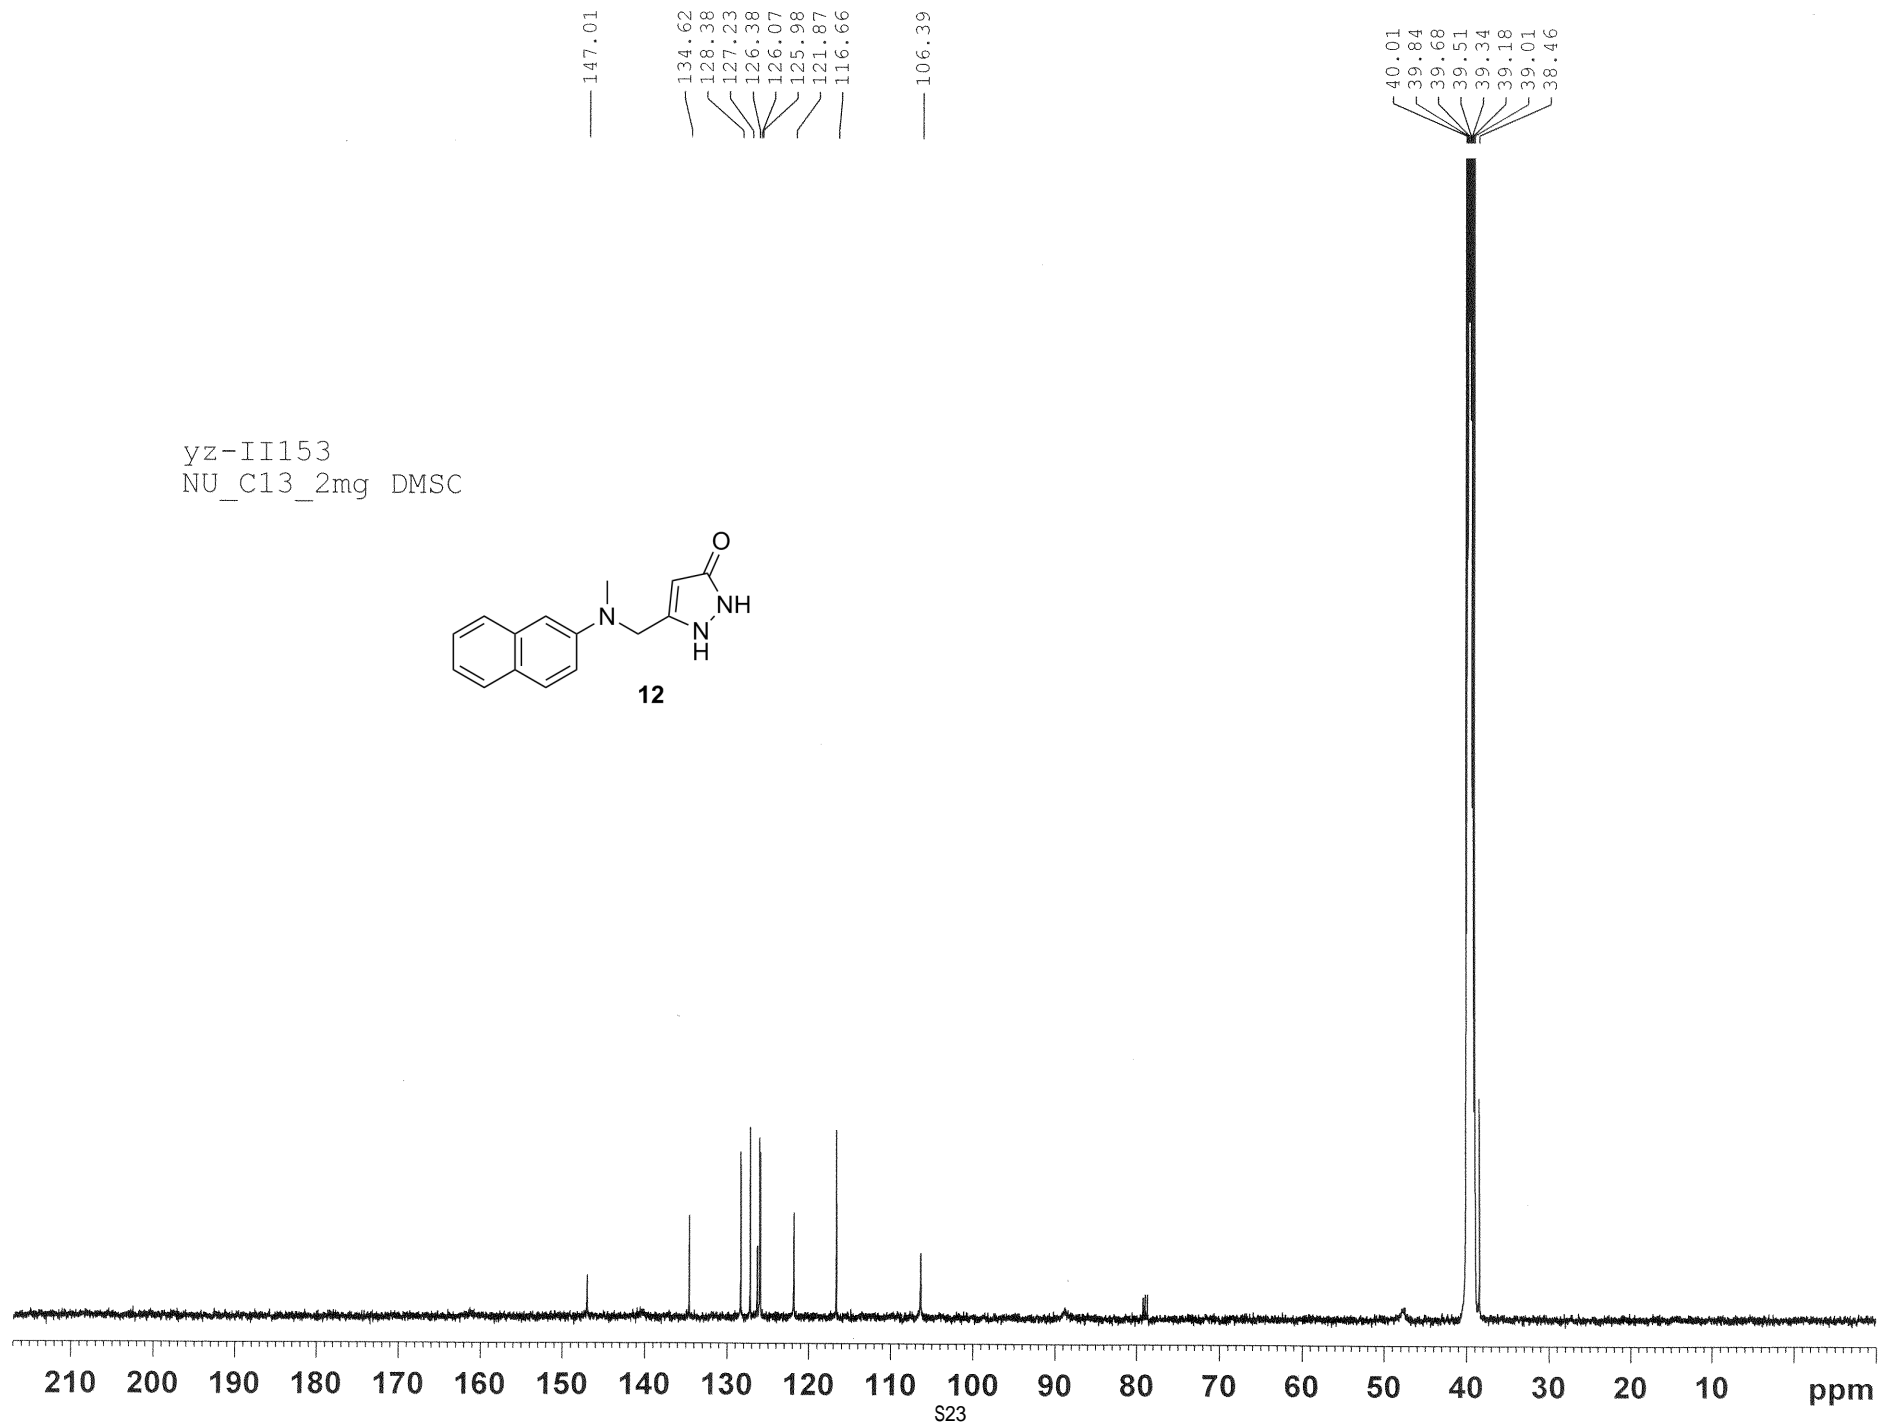

8.277  
8.261  
7.895  
7.880  
7.877  
7.596  
7.580  
7.528  
7.526  
7.513  
7.510  
7.498  
7.495  
7.428  
7.412  
7.396  
7.140  
7.126

— 5.314

— 4.082

2.732  
2.502  
2.499  
2.495

yz-III167  
PROTON DMSO

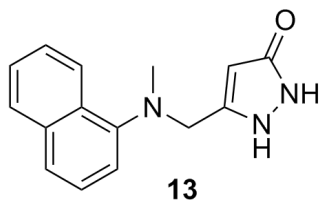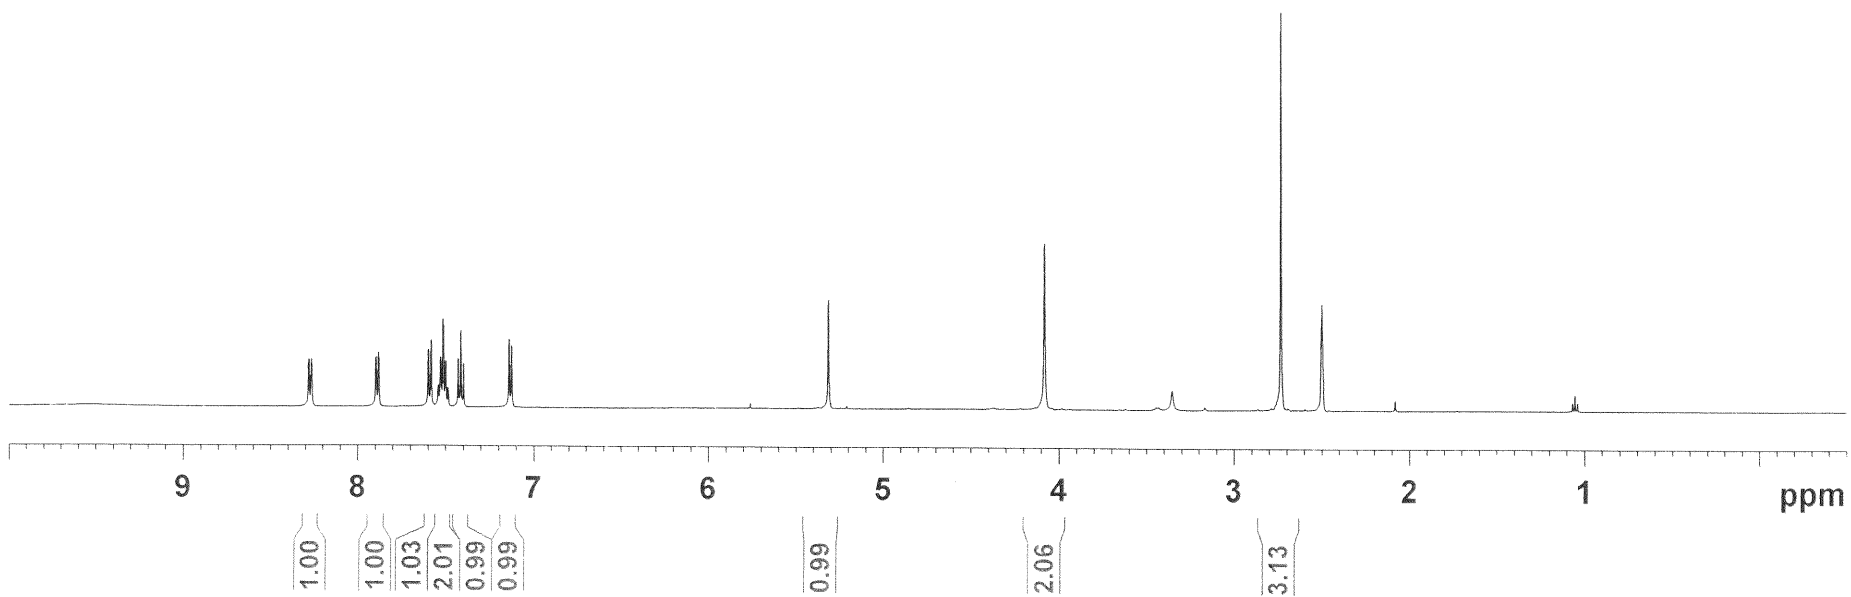



yz-III167  
NU\_C13\_5mg DMSO

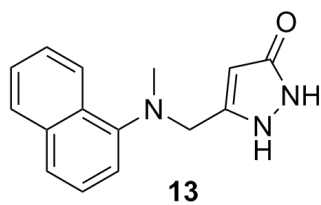

149.04  
134.36  
128.46  
128.27  
125.85  
125.81  
125.44  
123.61  
123.08  
115.67

41.61  
39.99  
39.91  
39.82  
39.75  
39.66  
39.49  
39.32  
39.16  
38.99

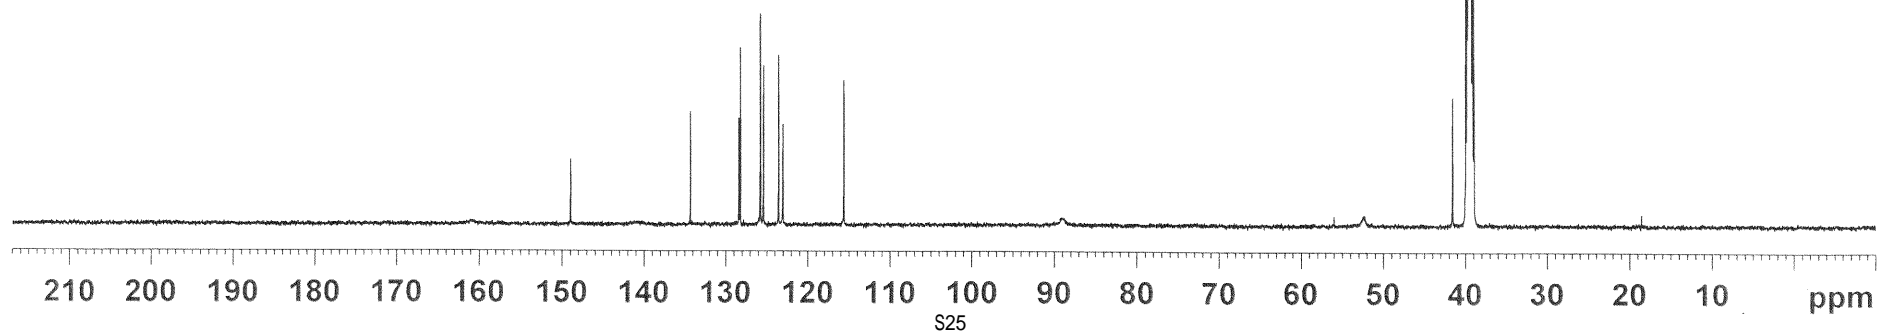

7.335  
7.317  
6.910  
6.904  
6.750  
6.744  
6.731  
6.726  
— 5.224  
— 4.386  
— 3.342  
— 2.936  
2.503  
2.500  
2.496

yz-III139  
PROTON DMSO

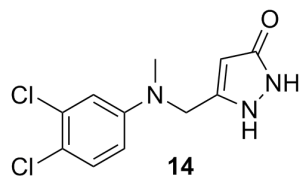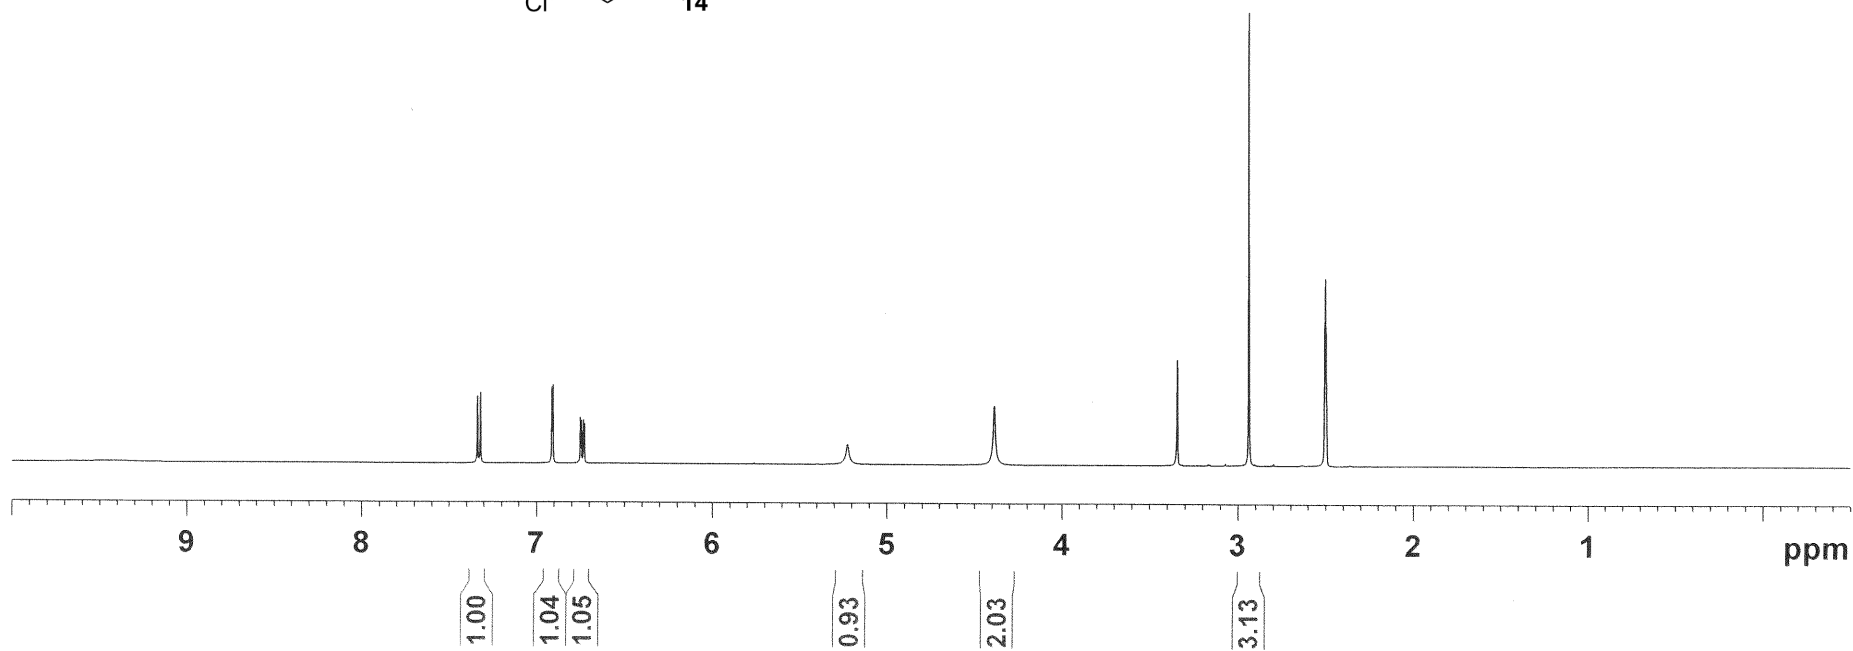

yz-III139  
NU\_C13\_2mg DMSO

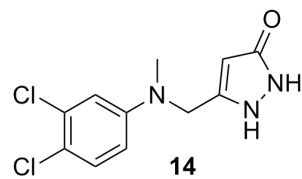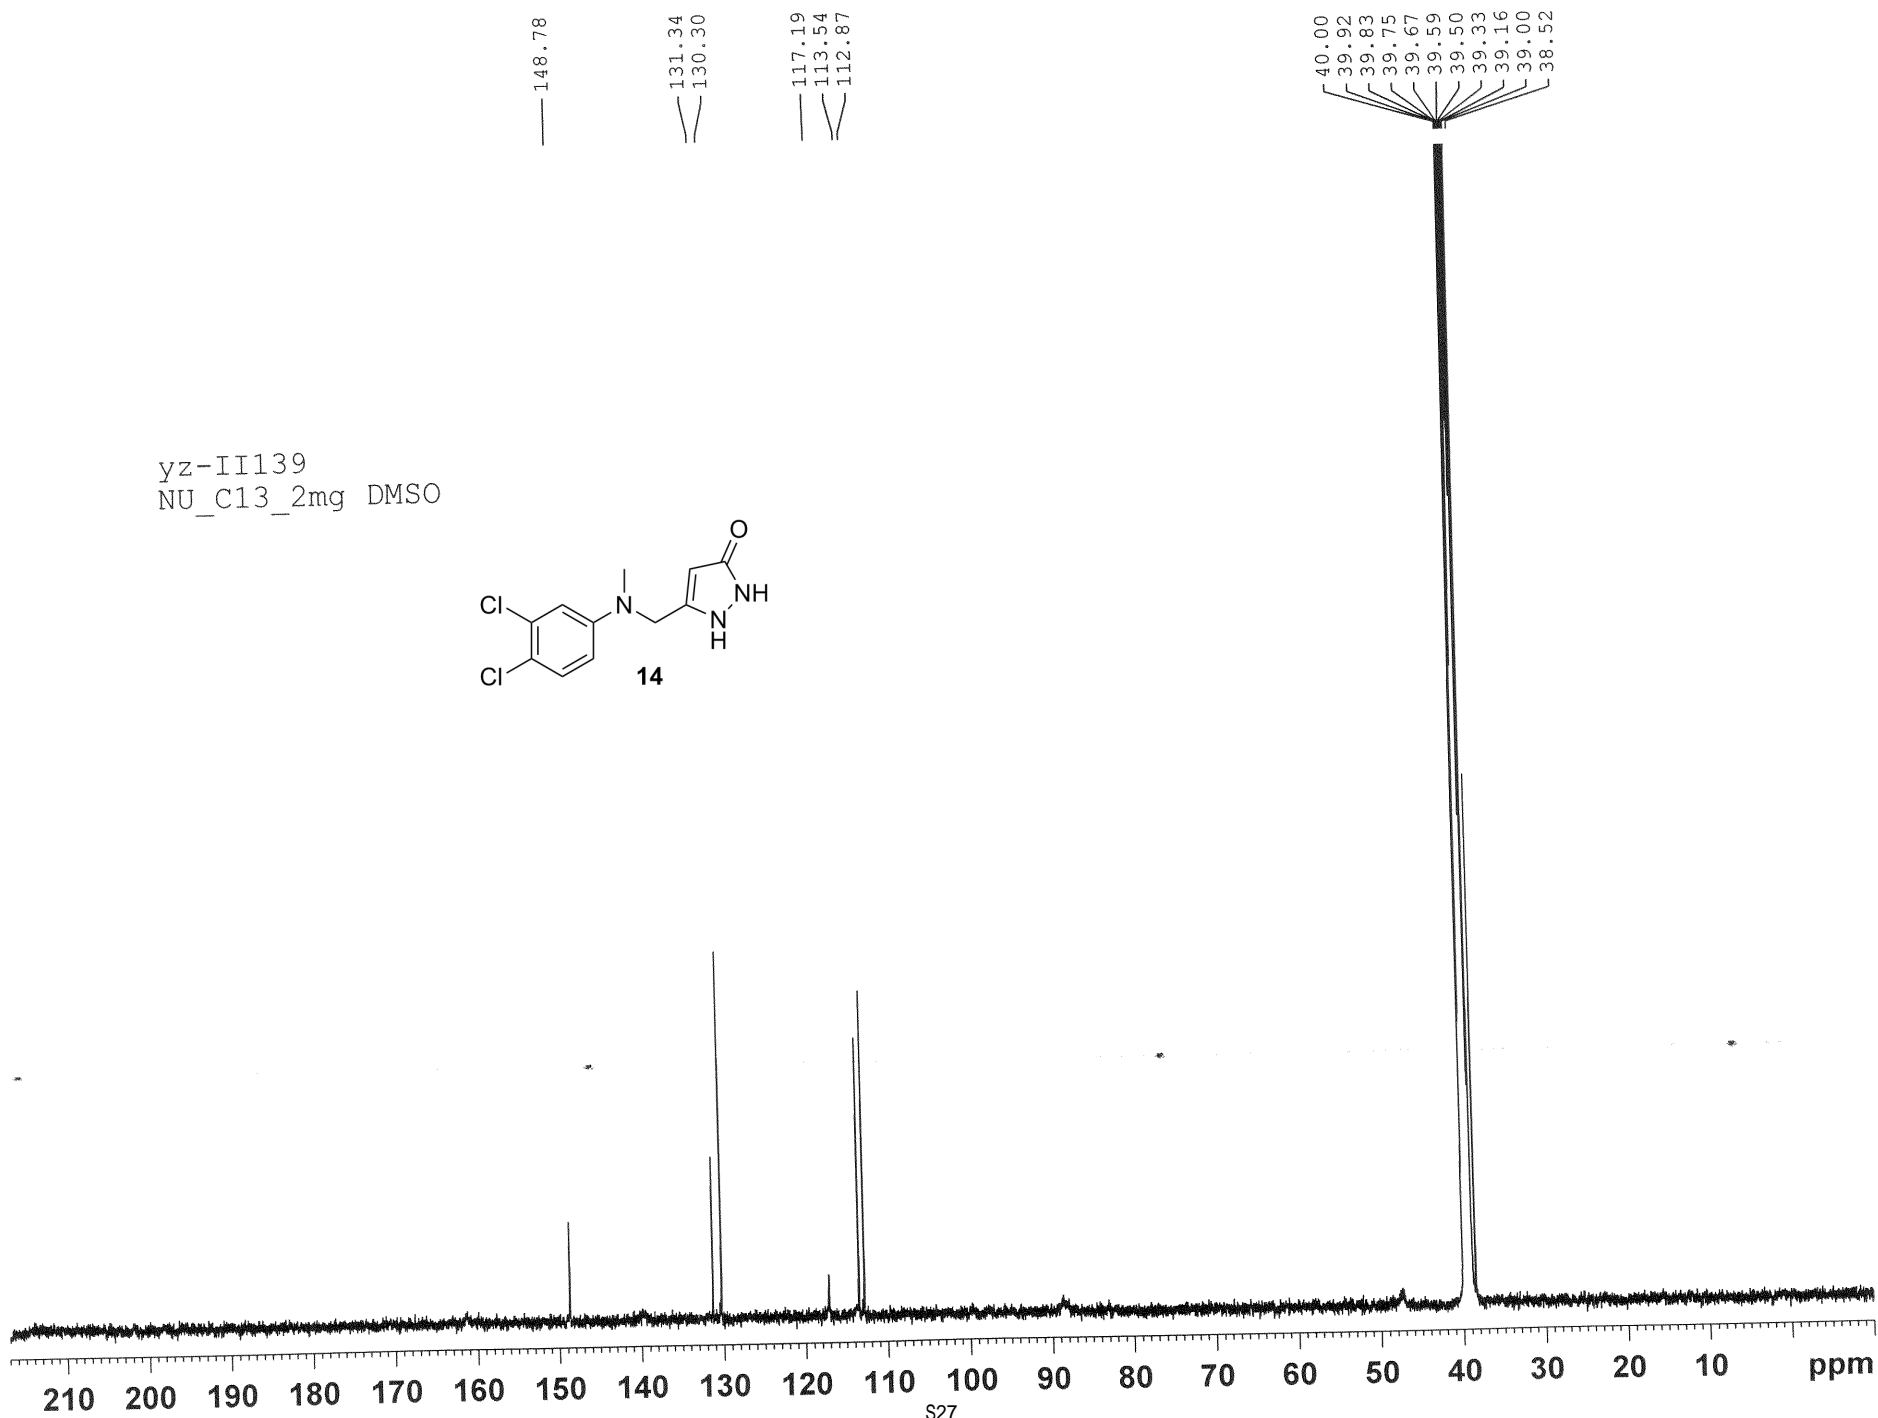

7.535  
7.531  
7.322  
7.318  
7.305  
7.301  
7.100  
7.083

— 5.201

— 4.049

— 3.356

— 2.635

— 2.498

yz-III141  
PROTON DMSO

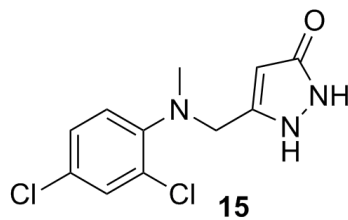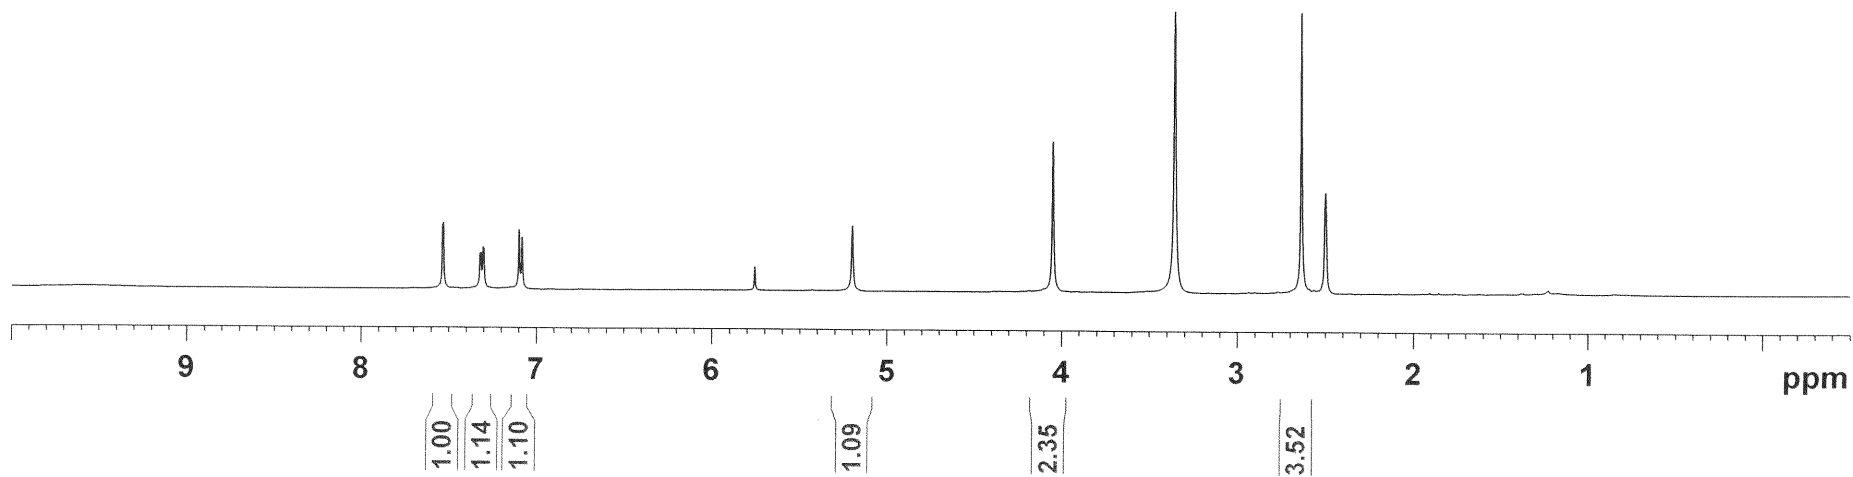

yz-III141  
NU\_C13\_5mg DMSO

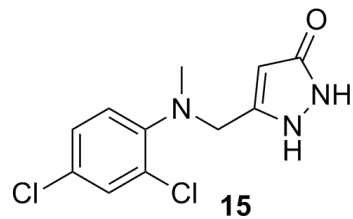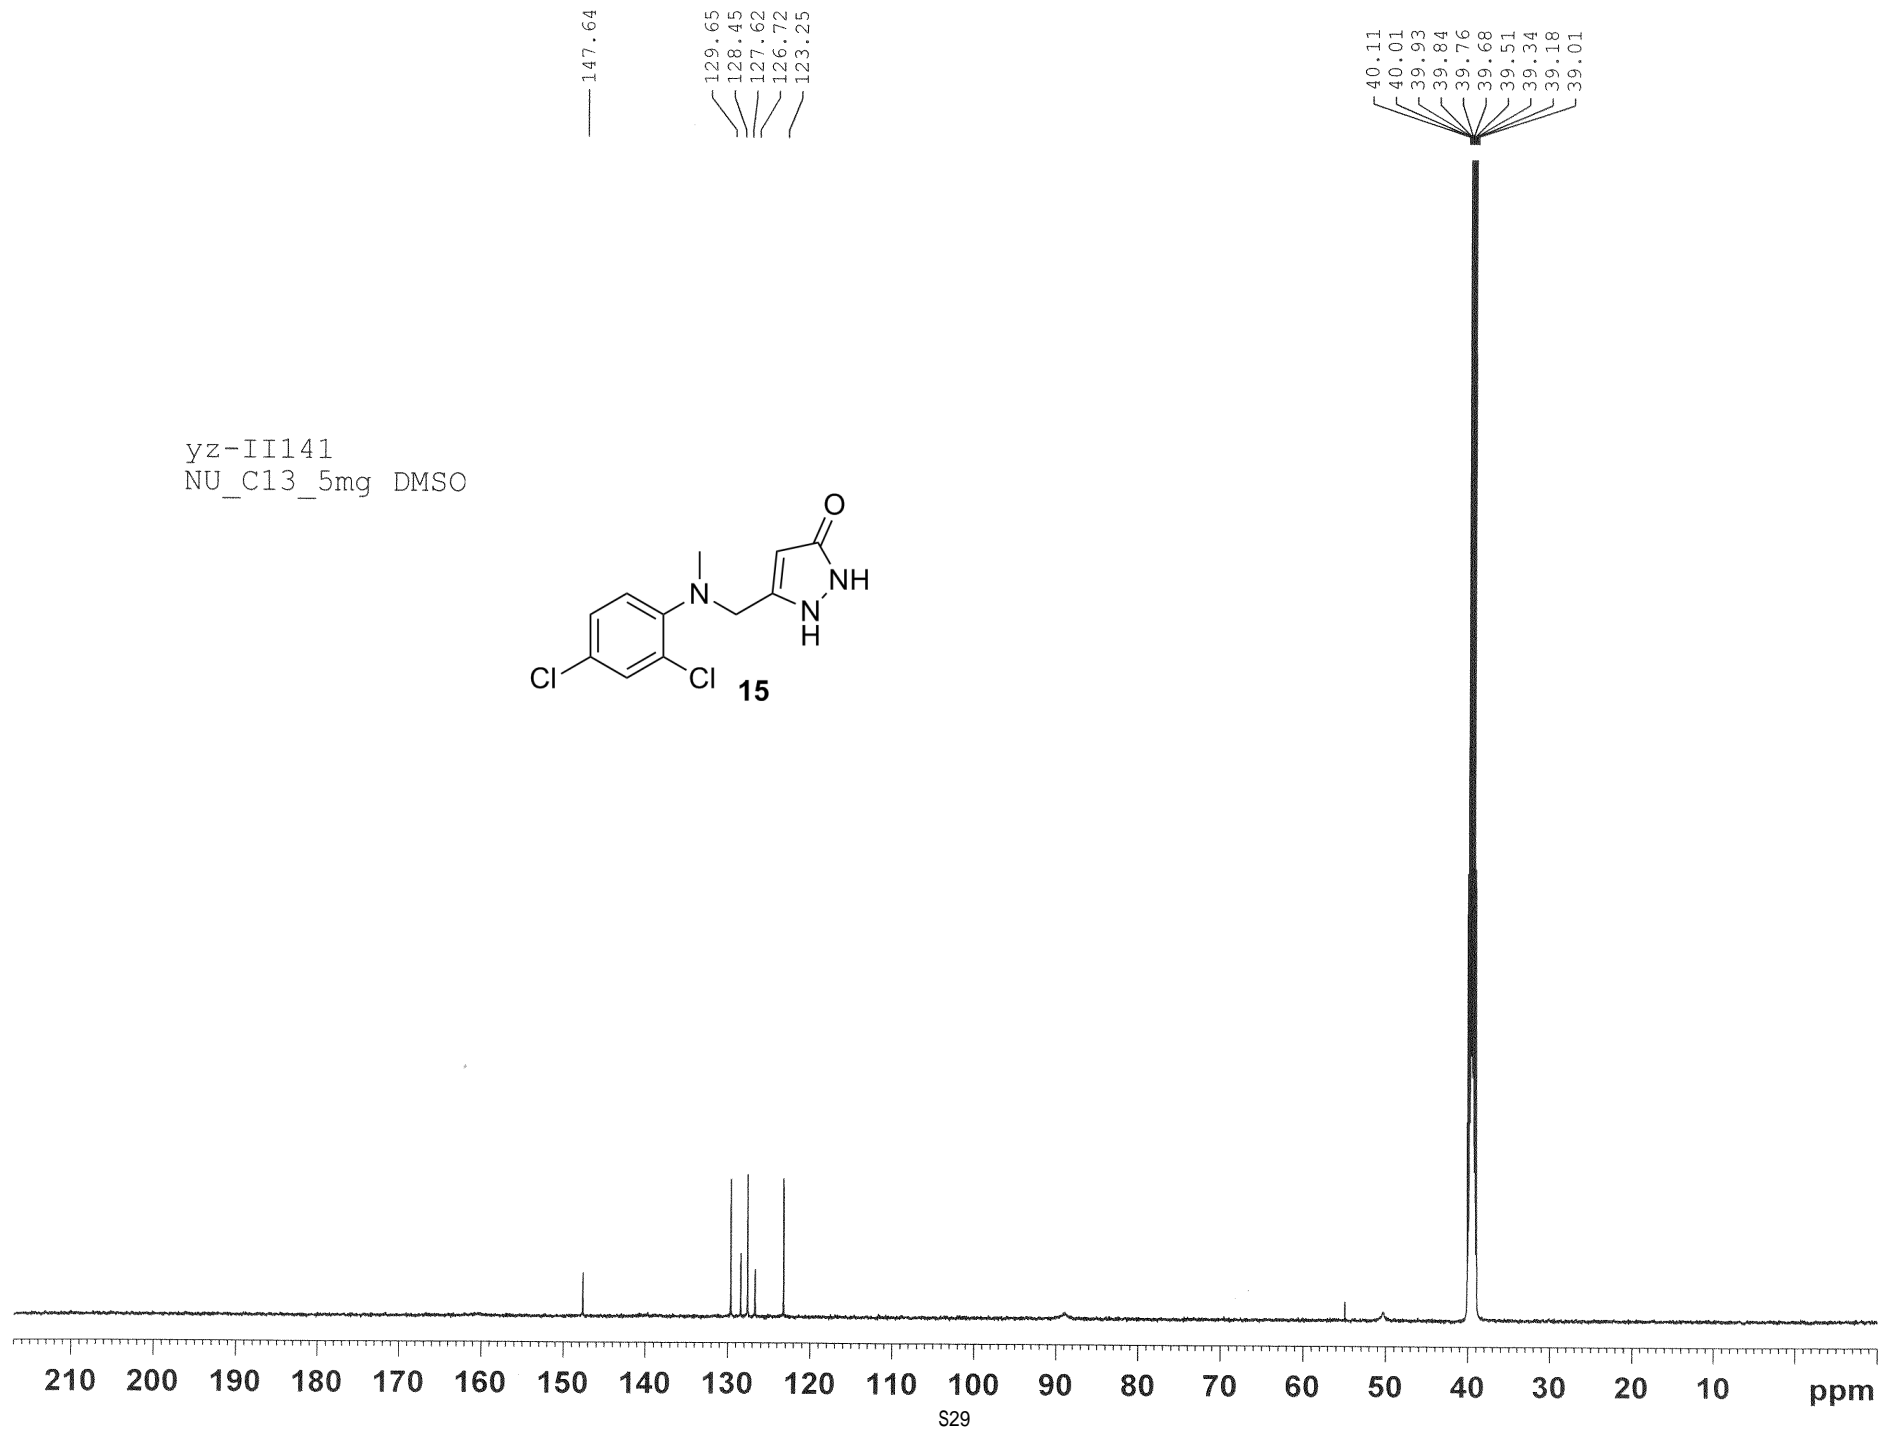

yz-III156  
PROTON DMSO

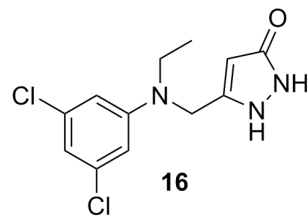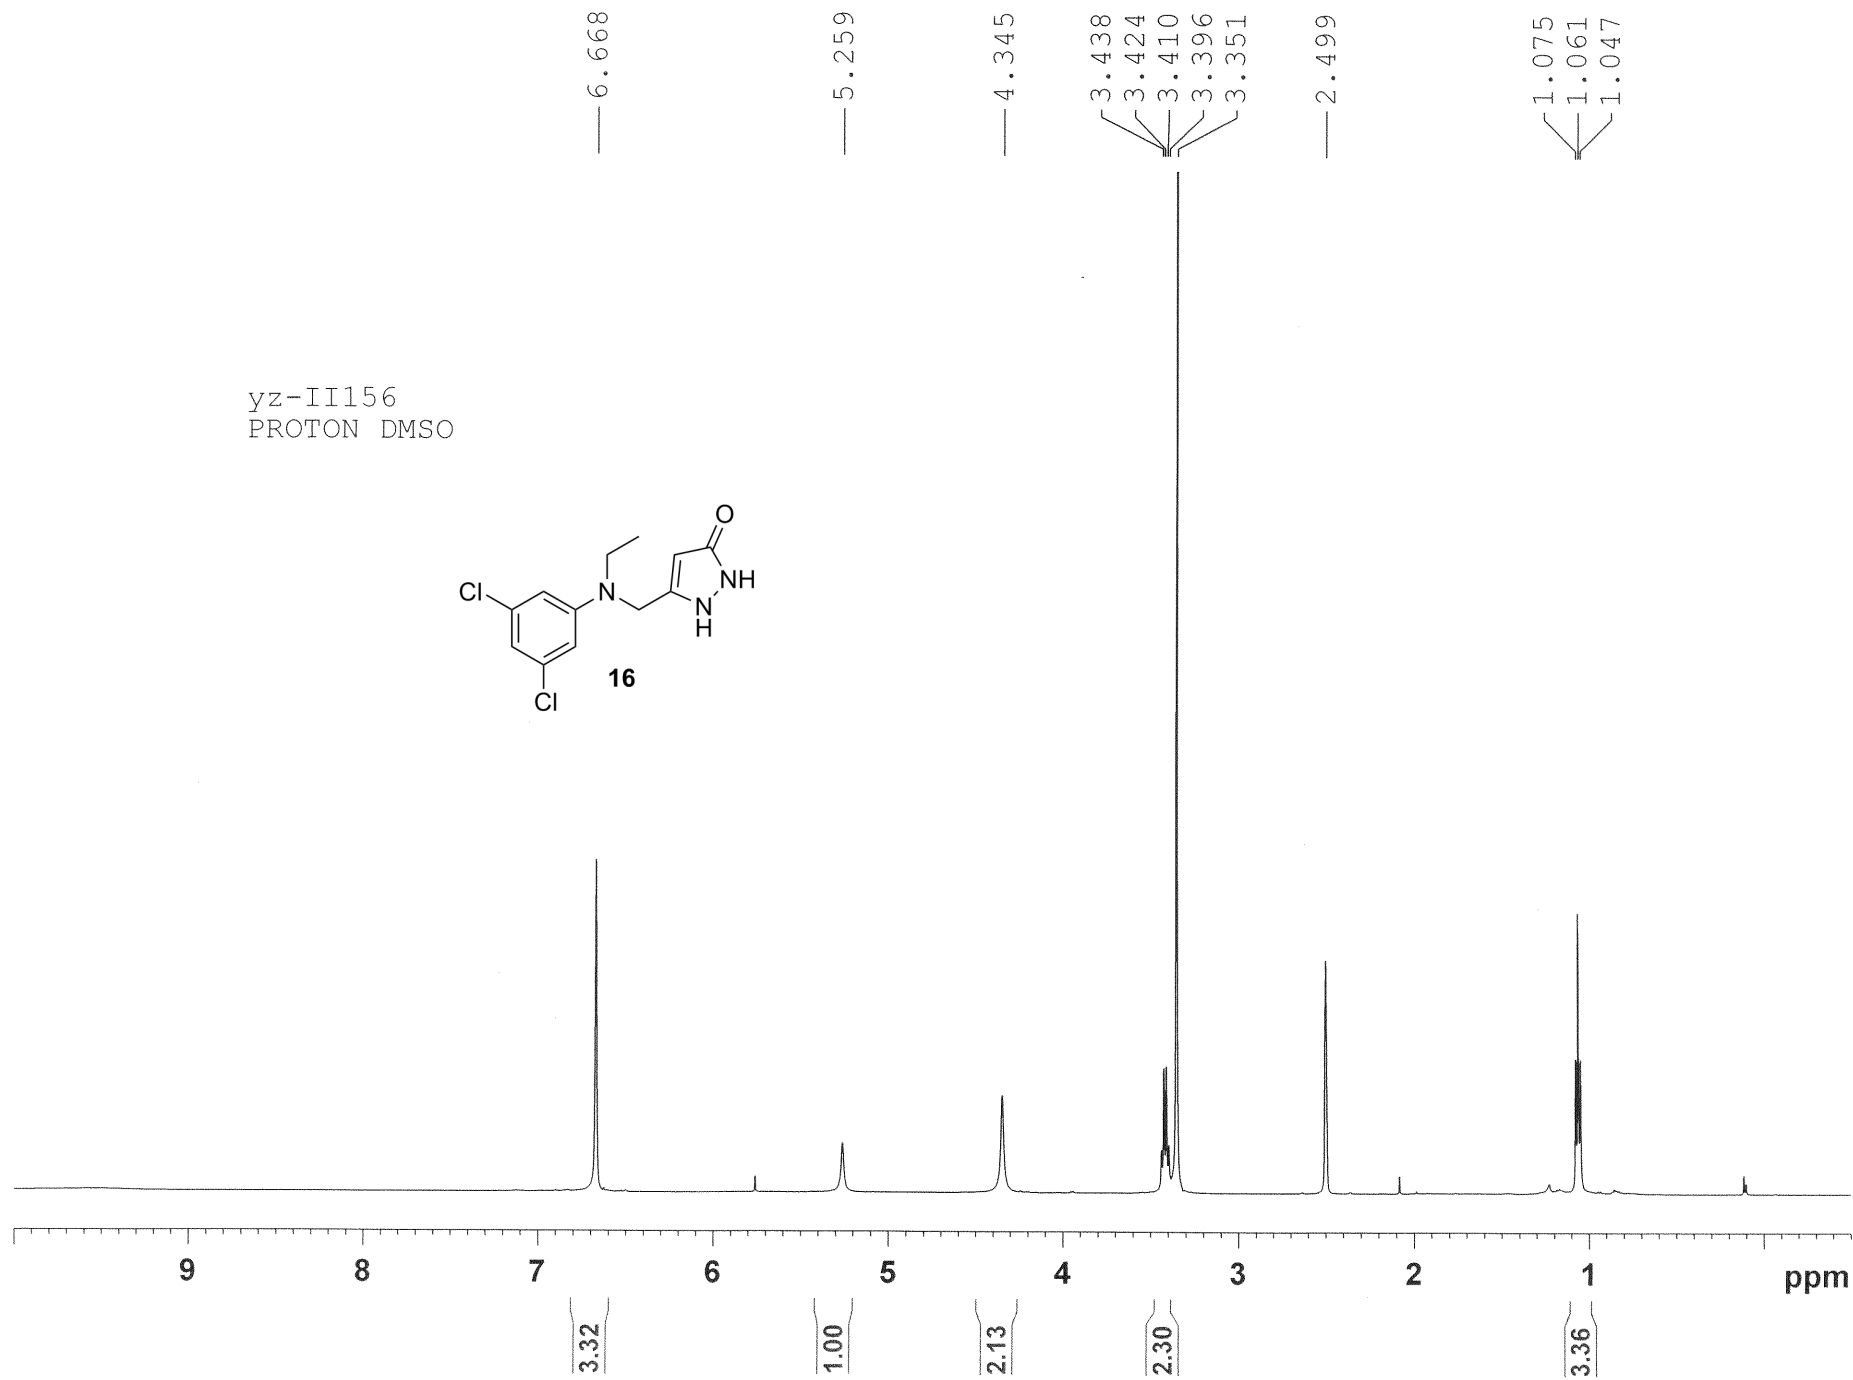

yz-III156  
NU\_C13\_2mg DMSO

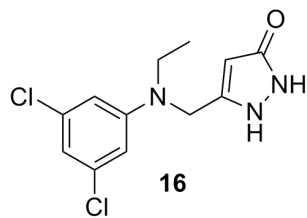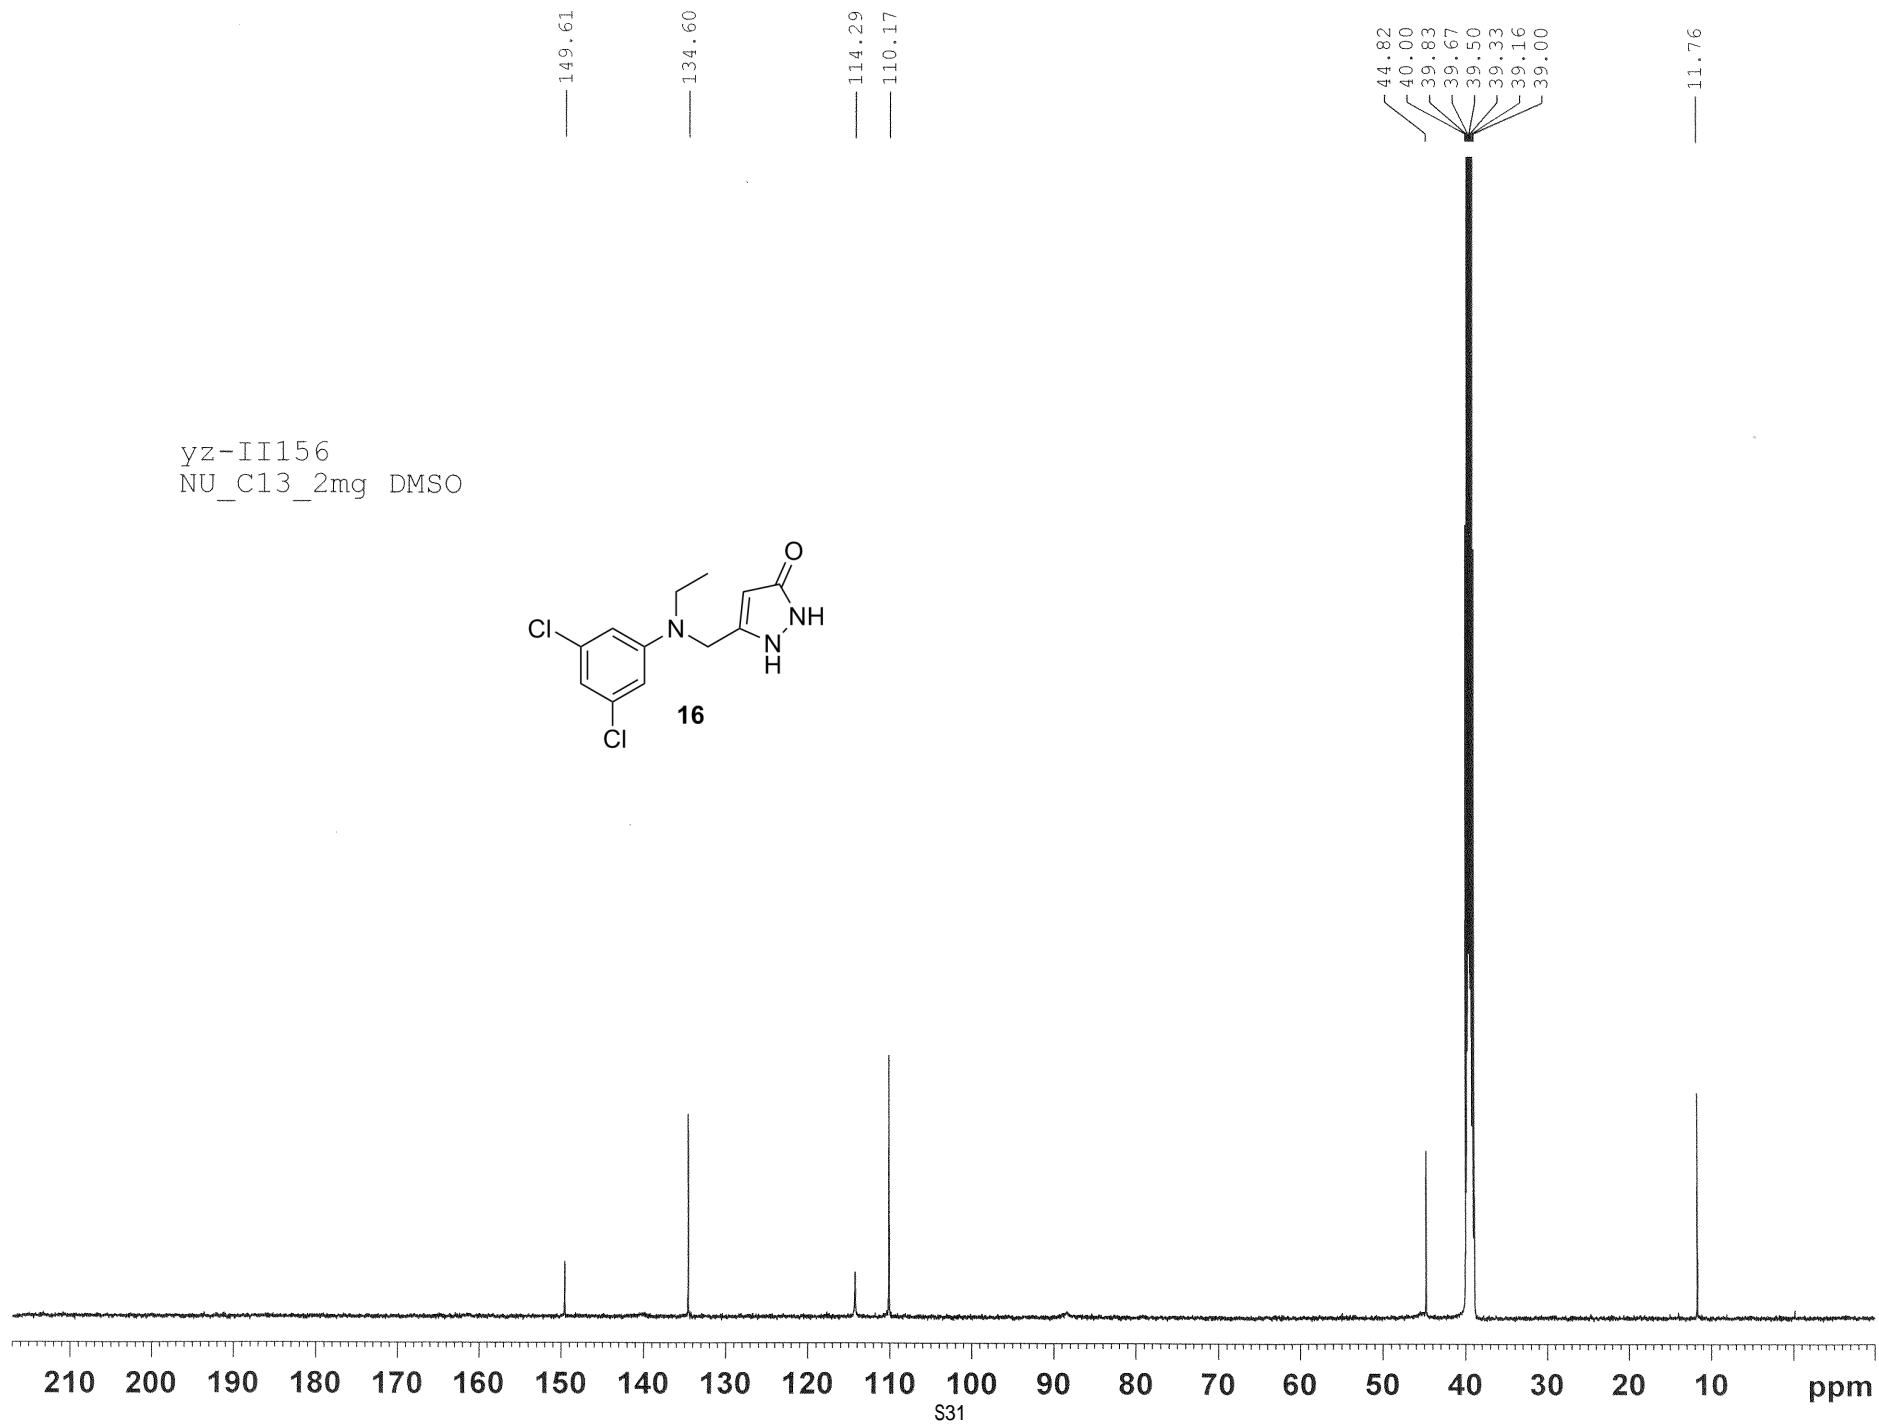

yz-III173  
PROTON DMSO

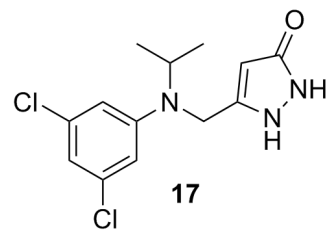

6.683  
6.681  
6.672

5.223

4.250  
4.173  
4.160  
4.146

2.498  
2.494  
2.491

1.139  
1.125

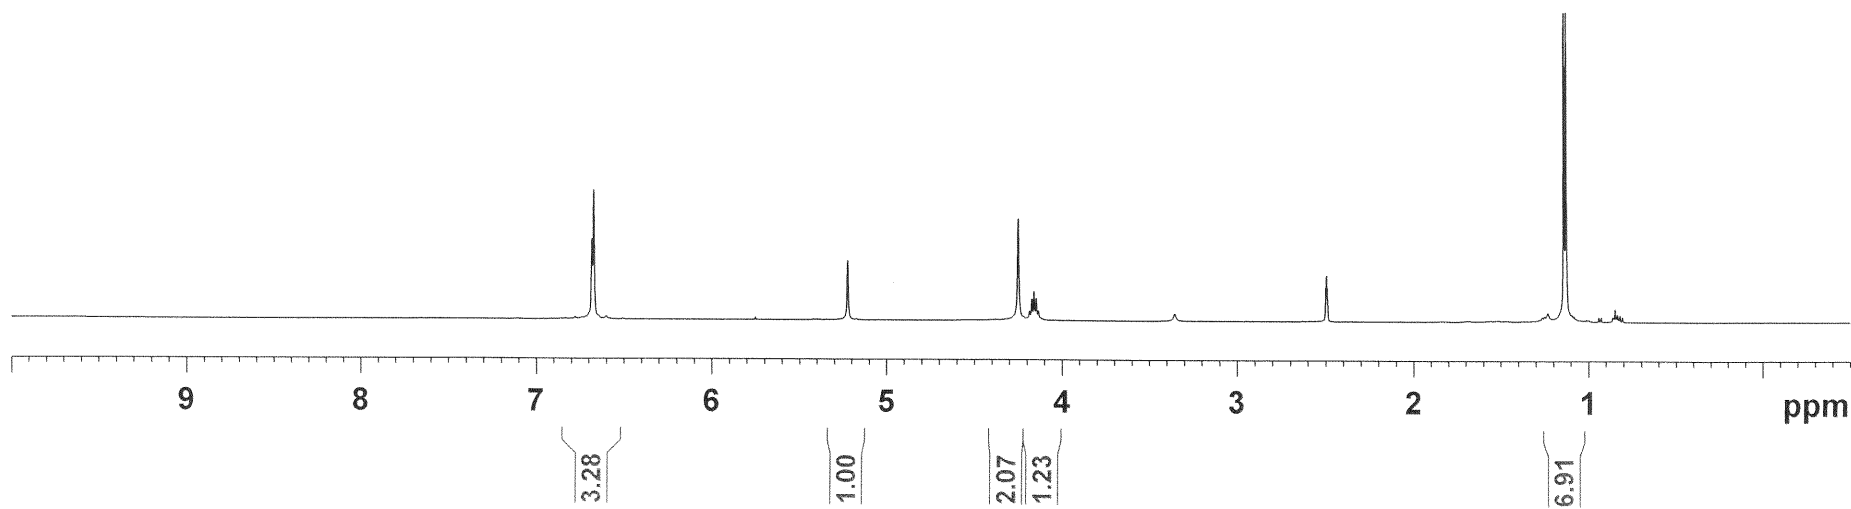



yz-III173  
NU\_C13\_5mg DMSO

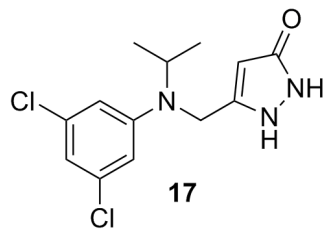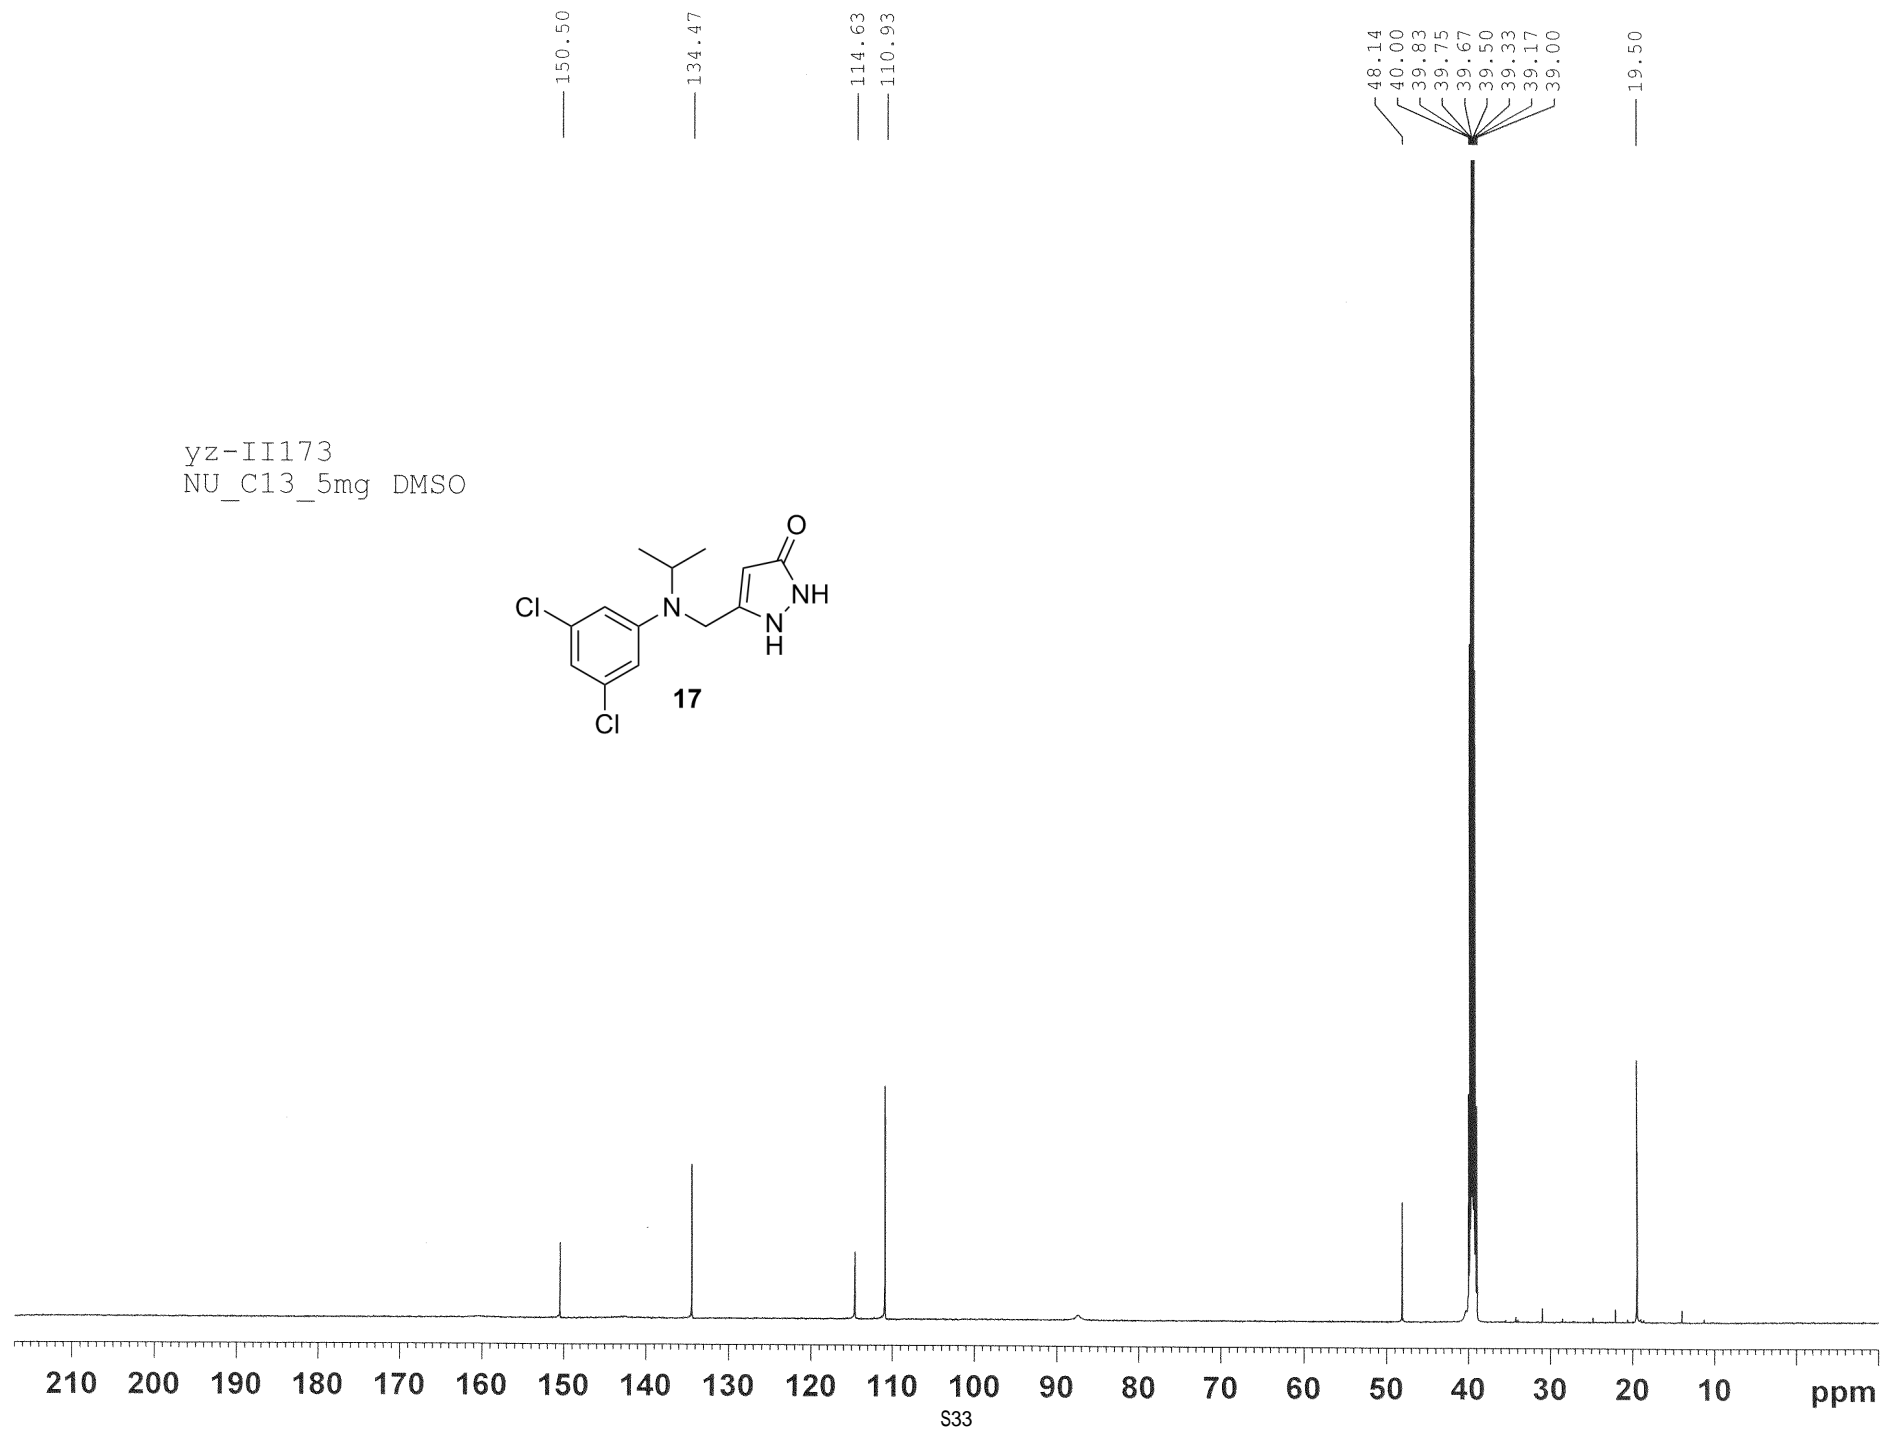

7.248  
7.216  
5.111  
4.174  
3.351  
3.330  
2.496  
1.124

yz-I188  
PROTON DMSO

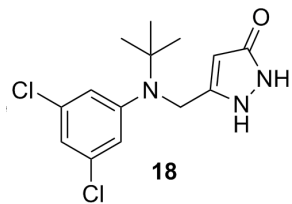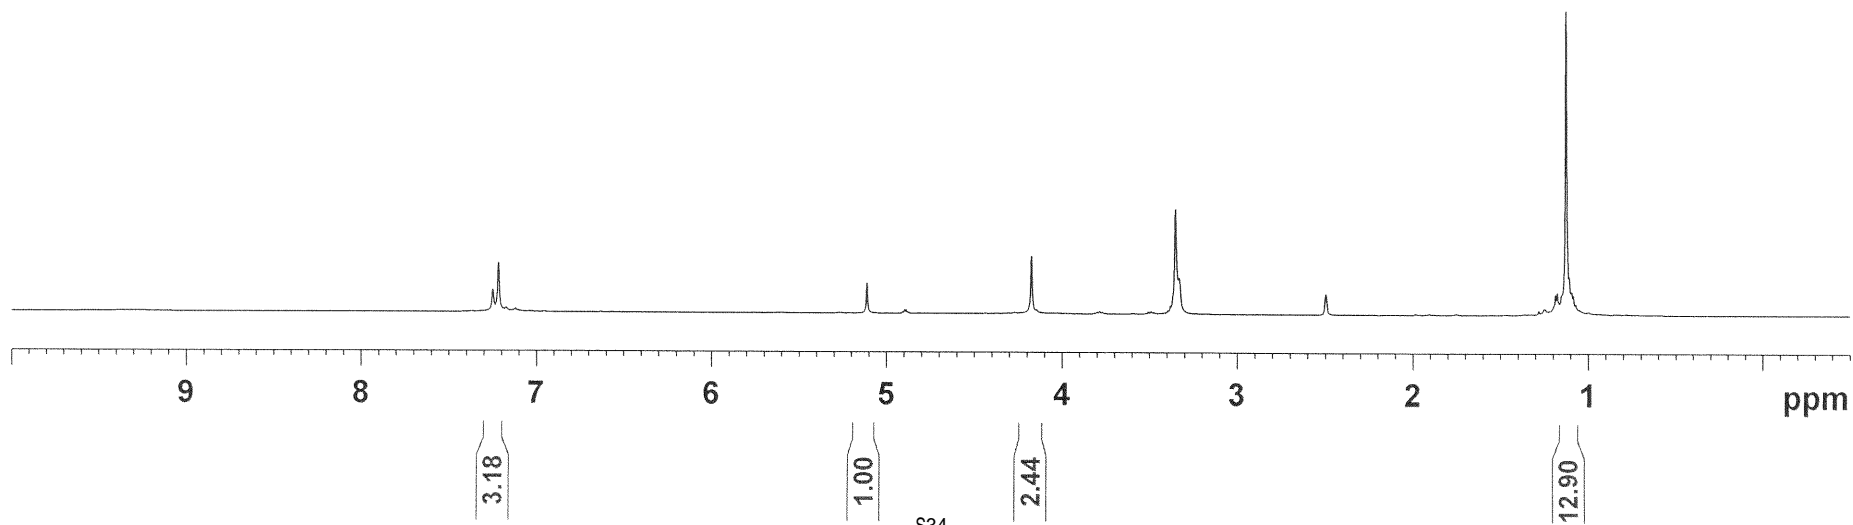

yz-I188  
NU\_C13\_5mg

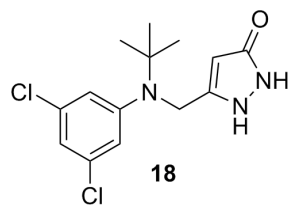

18

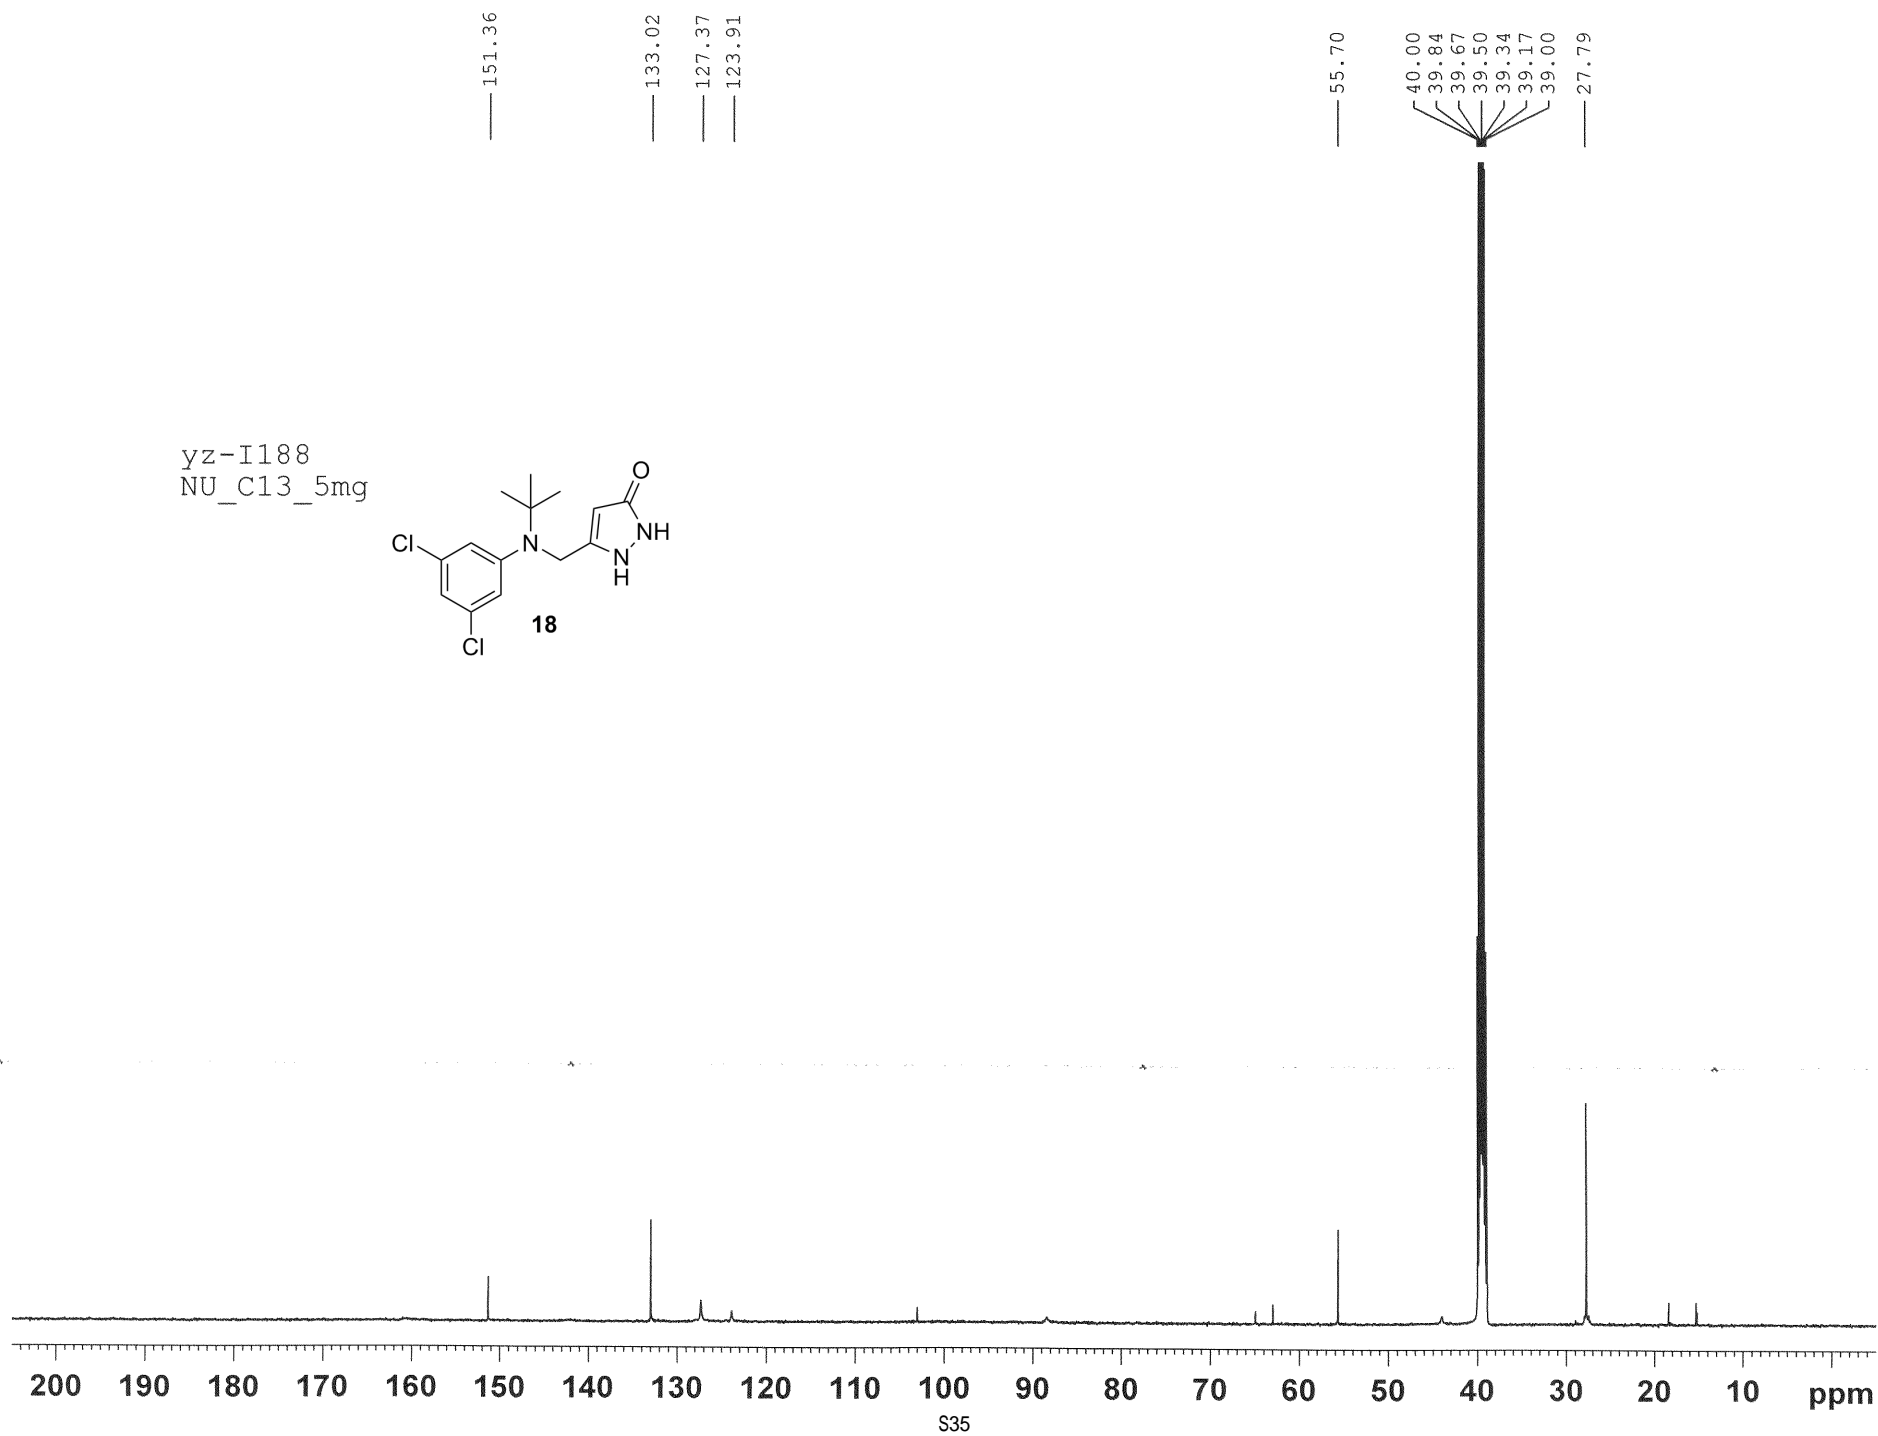

yz-I159  
PROTON DMSO

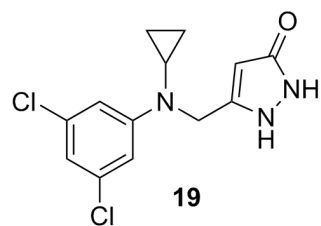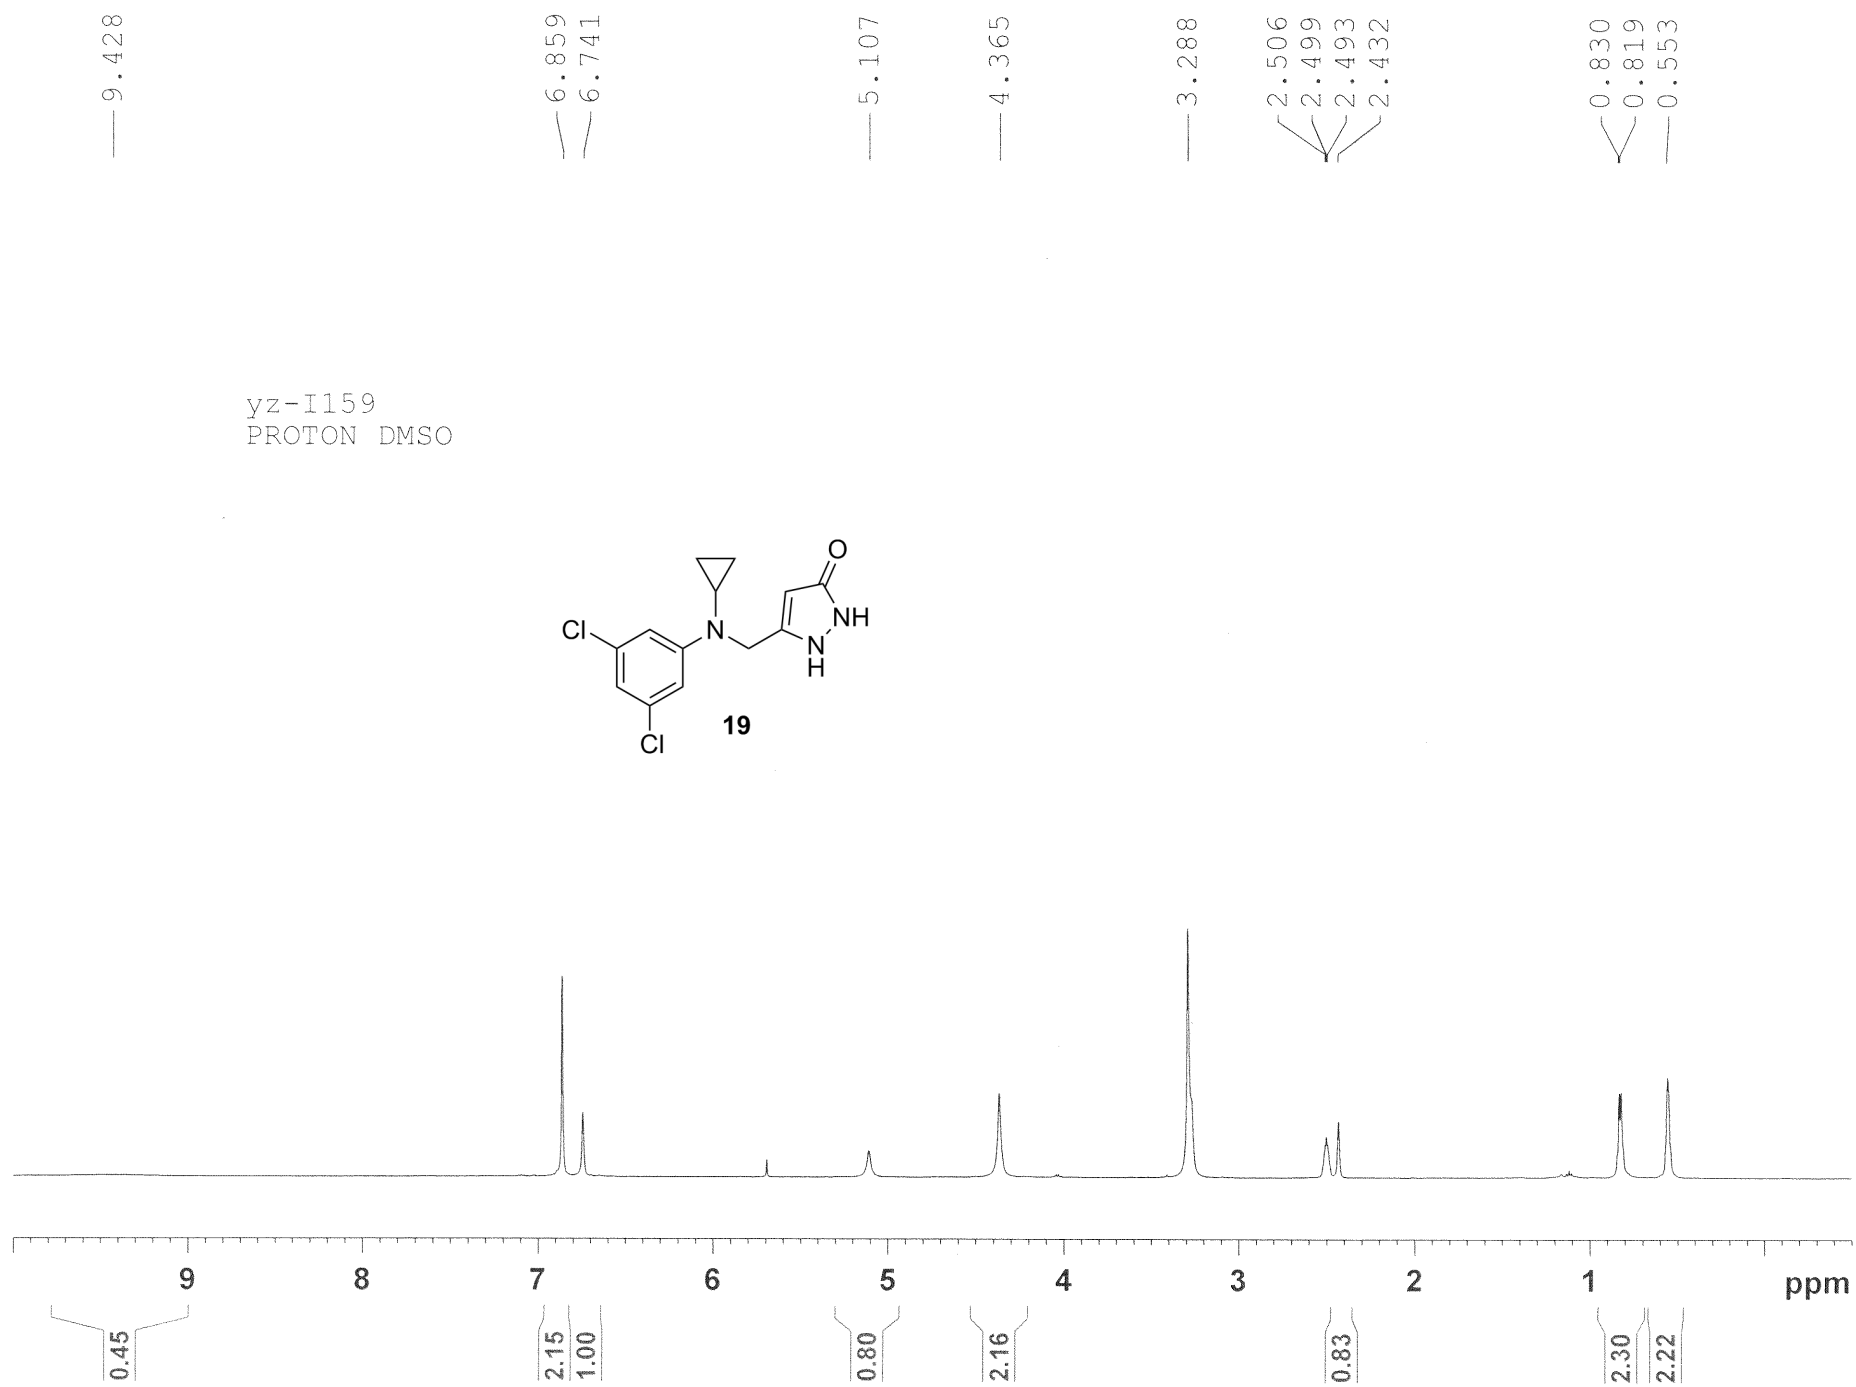

yz-I159  
NU\_C13\_2mg DMSC

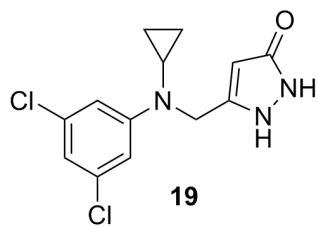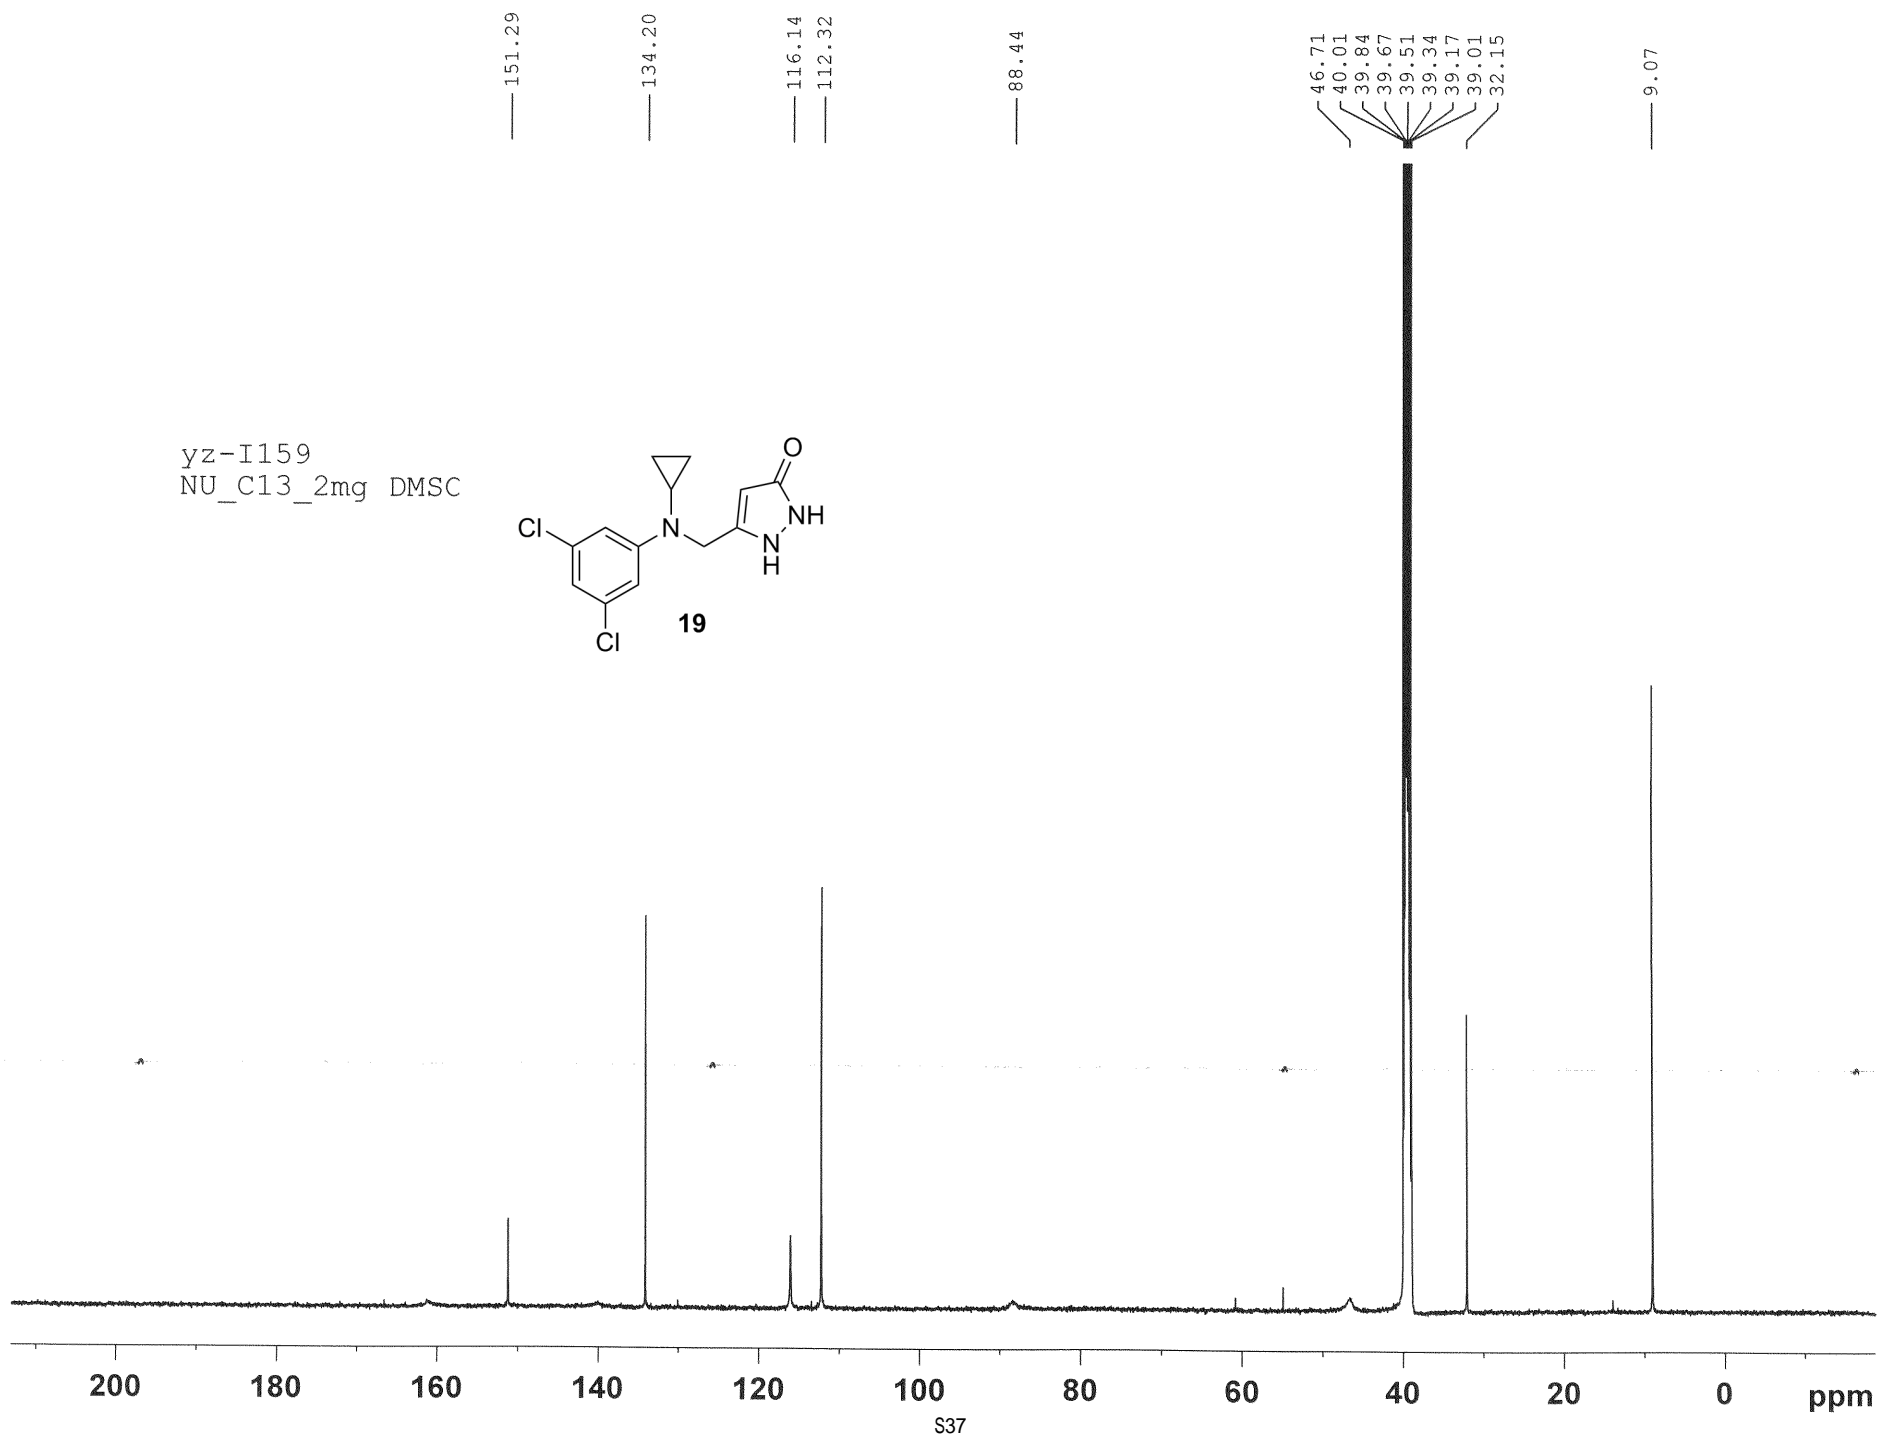

7.352  
7.338  
7.322  
7.264  
7.250  
7.235  
7.222  
7.207  
6.703  
6.681

— 5.318

— 4.659  
— 4.517

— 3.343

— 2.502  
— 2.499  
— 2.495

yz-I92  
PROTON DMSO

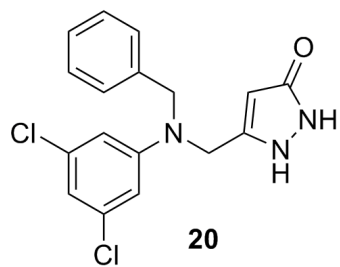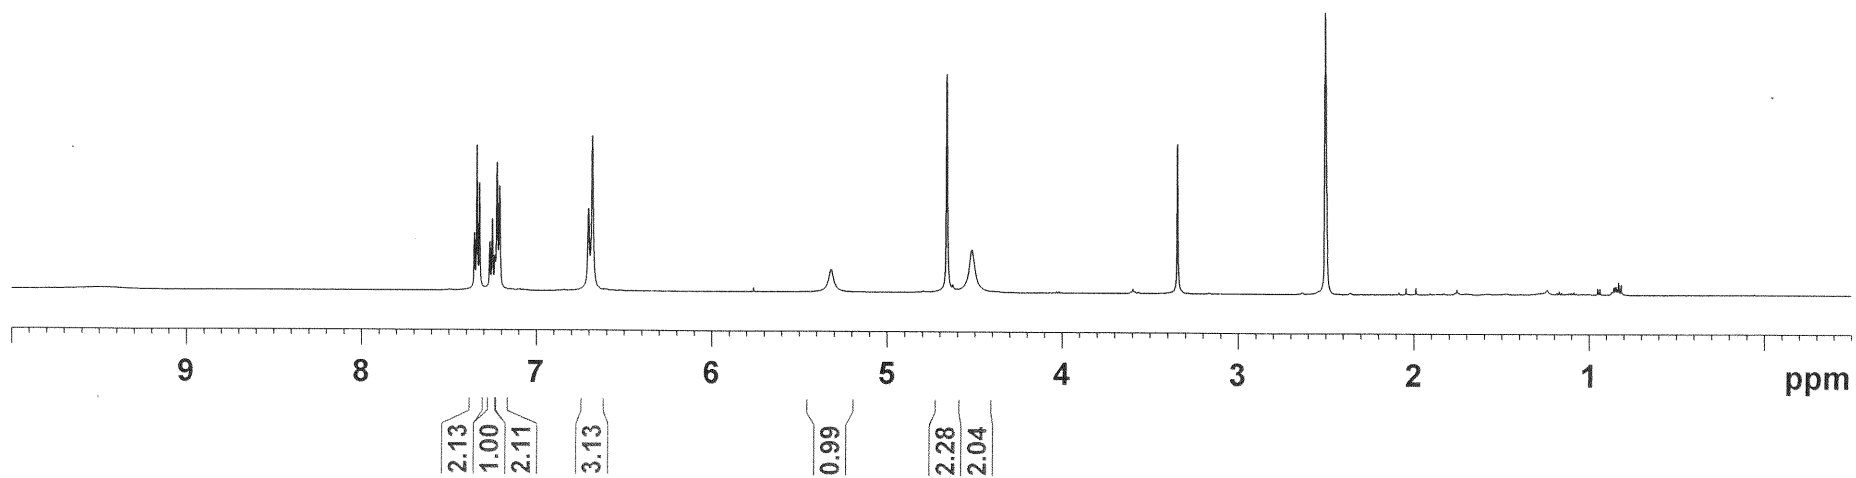

yz-I92  
NU\_C13\_5mg DMSC

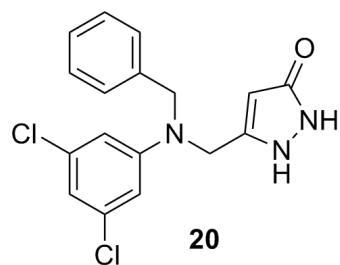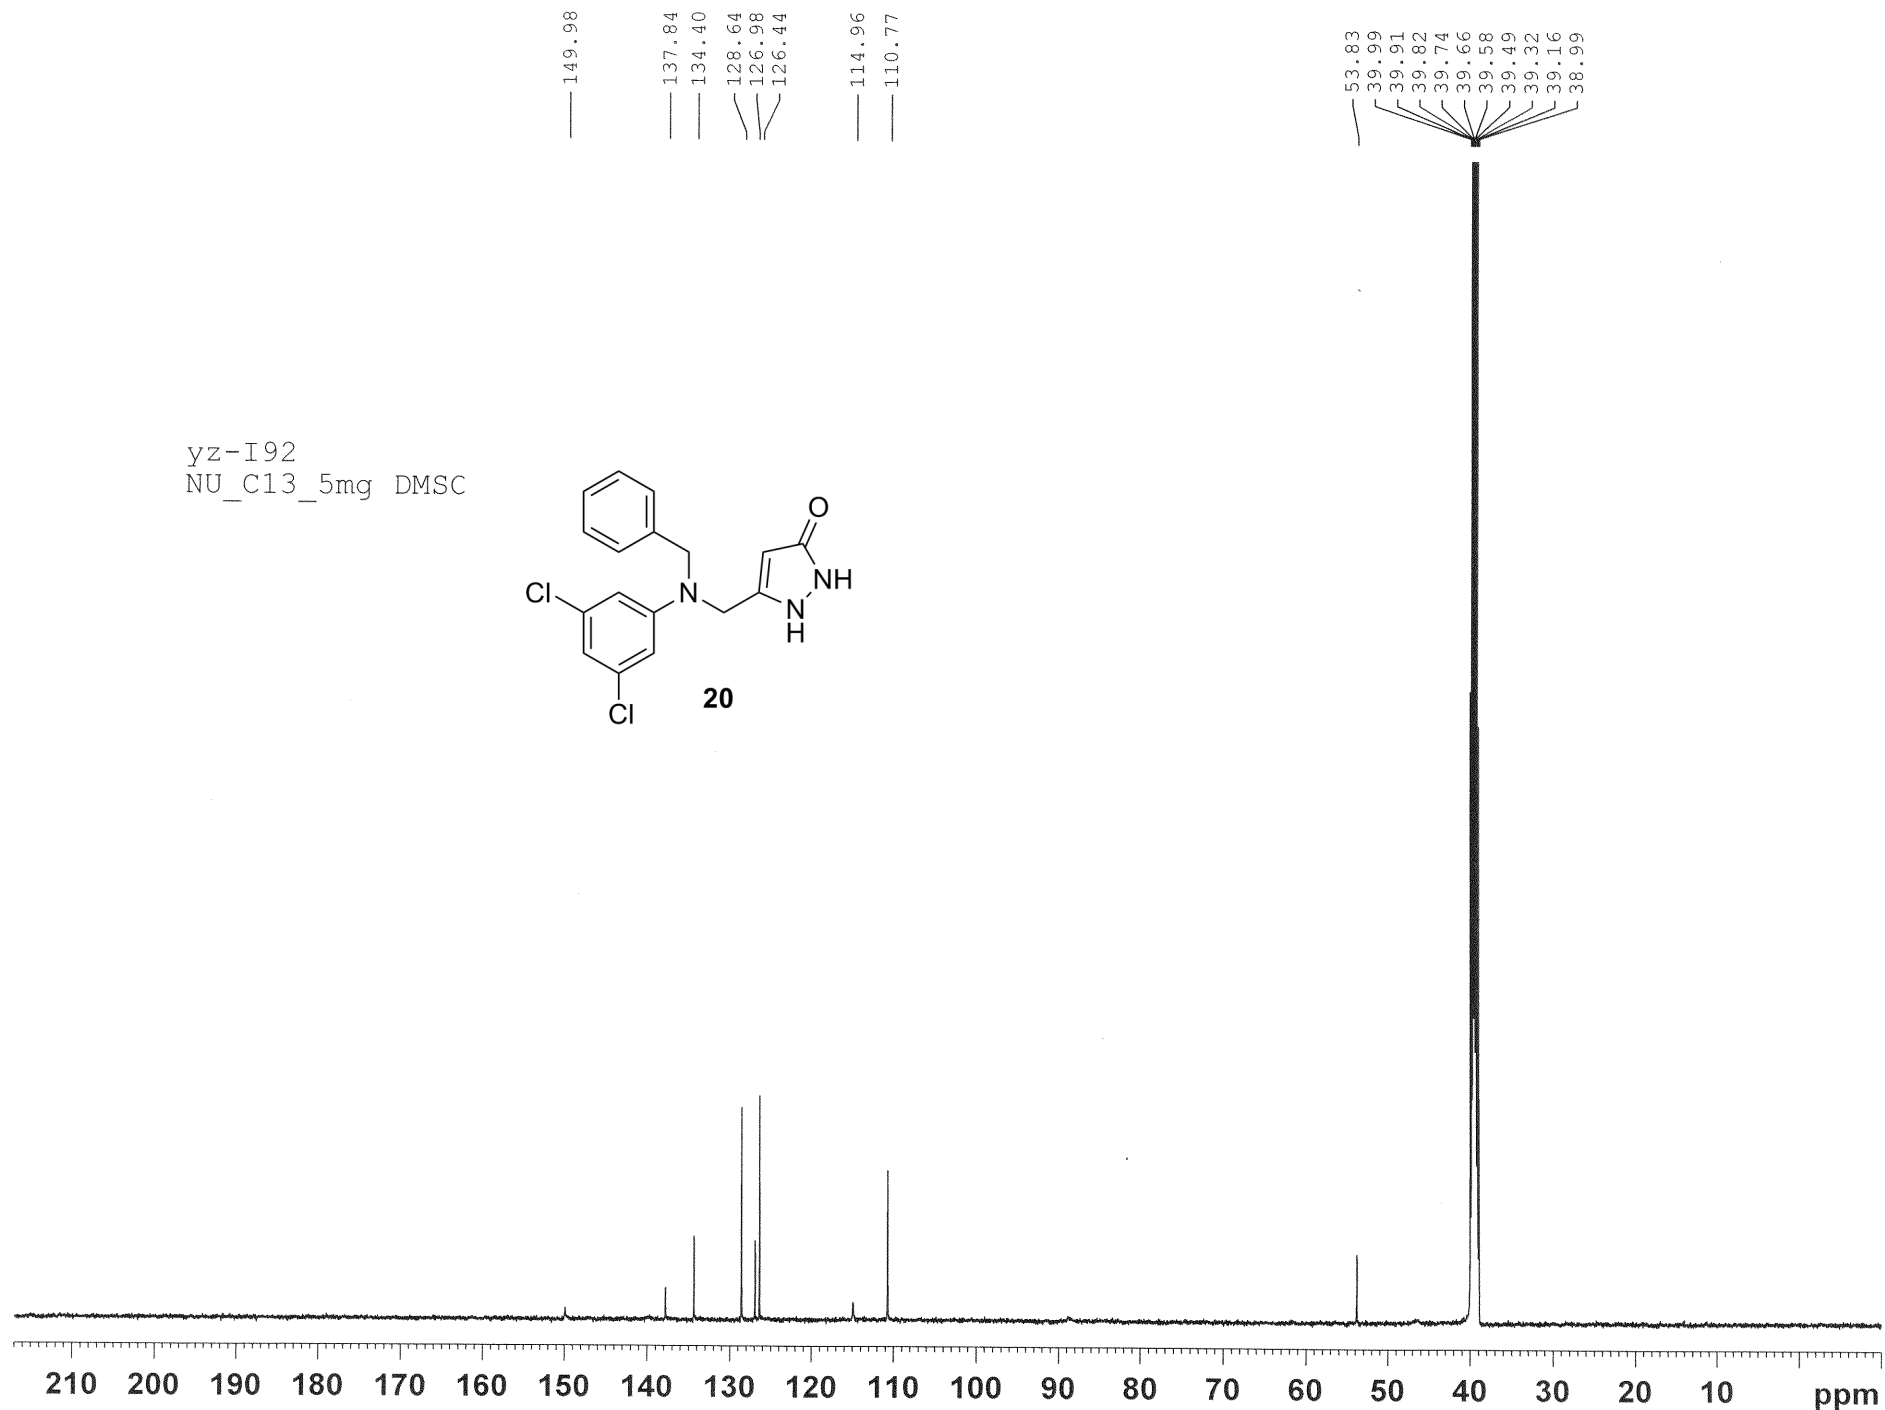

— 11.589

— 9.648

7.444  
7.429  
7.415  
7.276  
7.261  
7.245  
7.230  
7.216  
6.879  
6.715

— 5.242

— 4.774

— 3.347

— 2.500

yz-I103  
PROTON DMSO

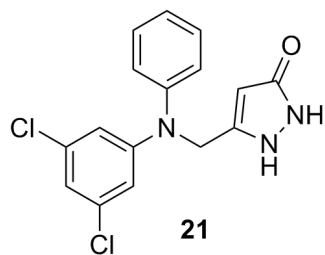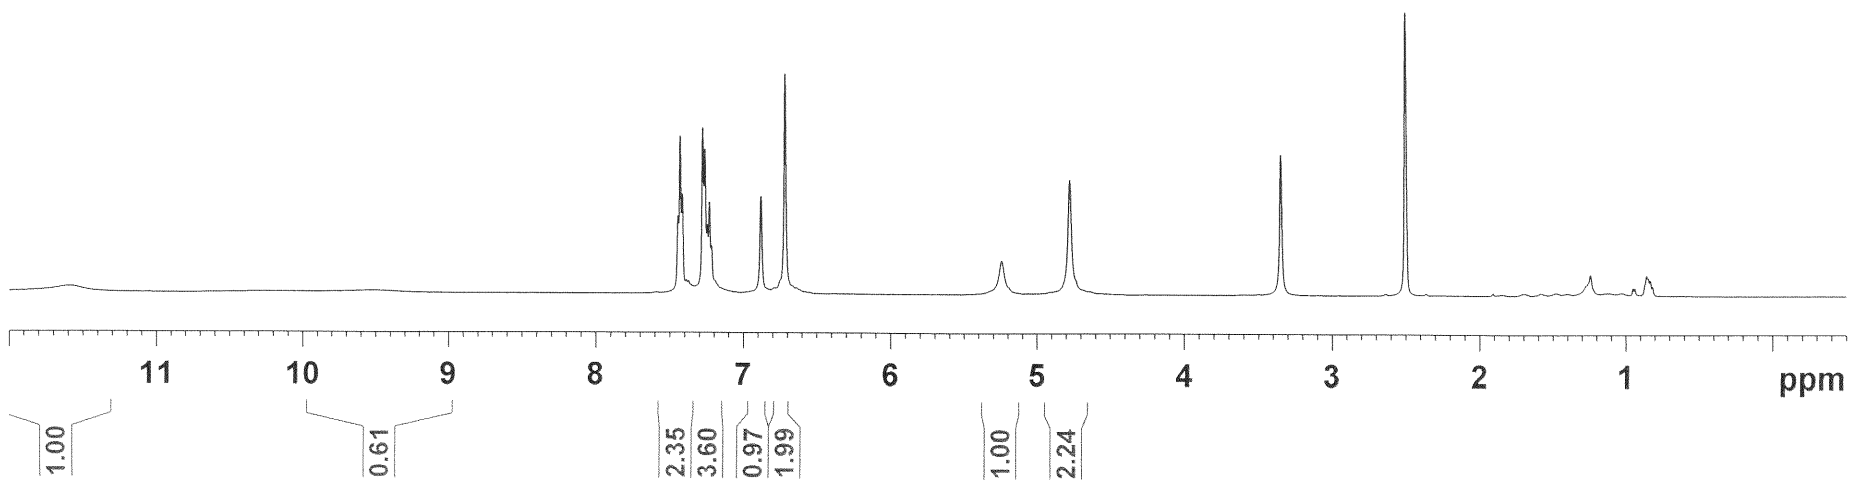



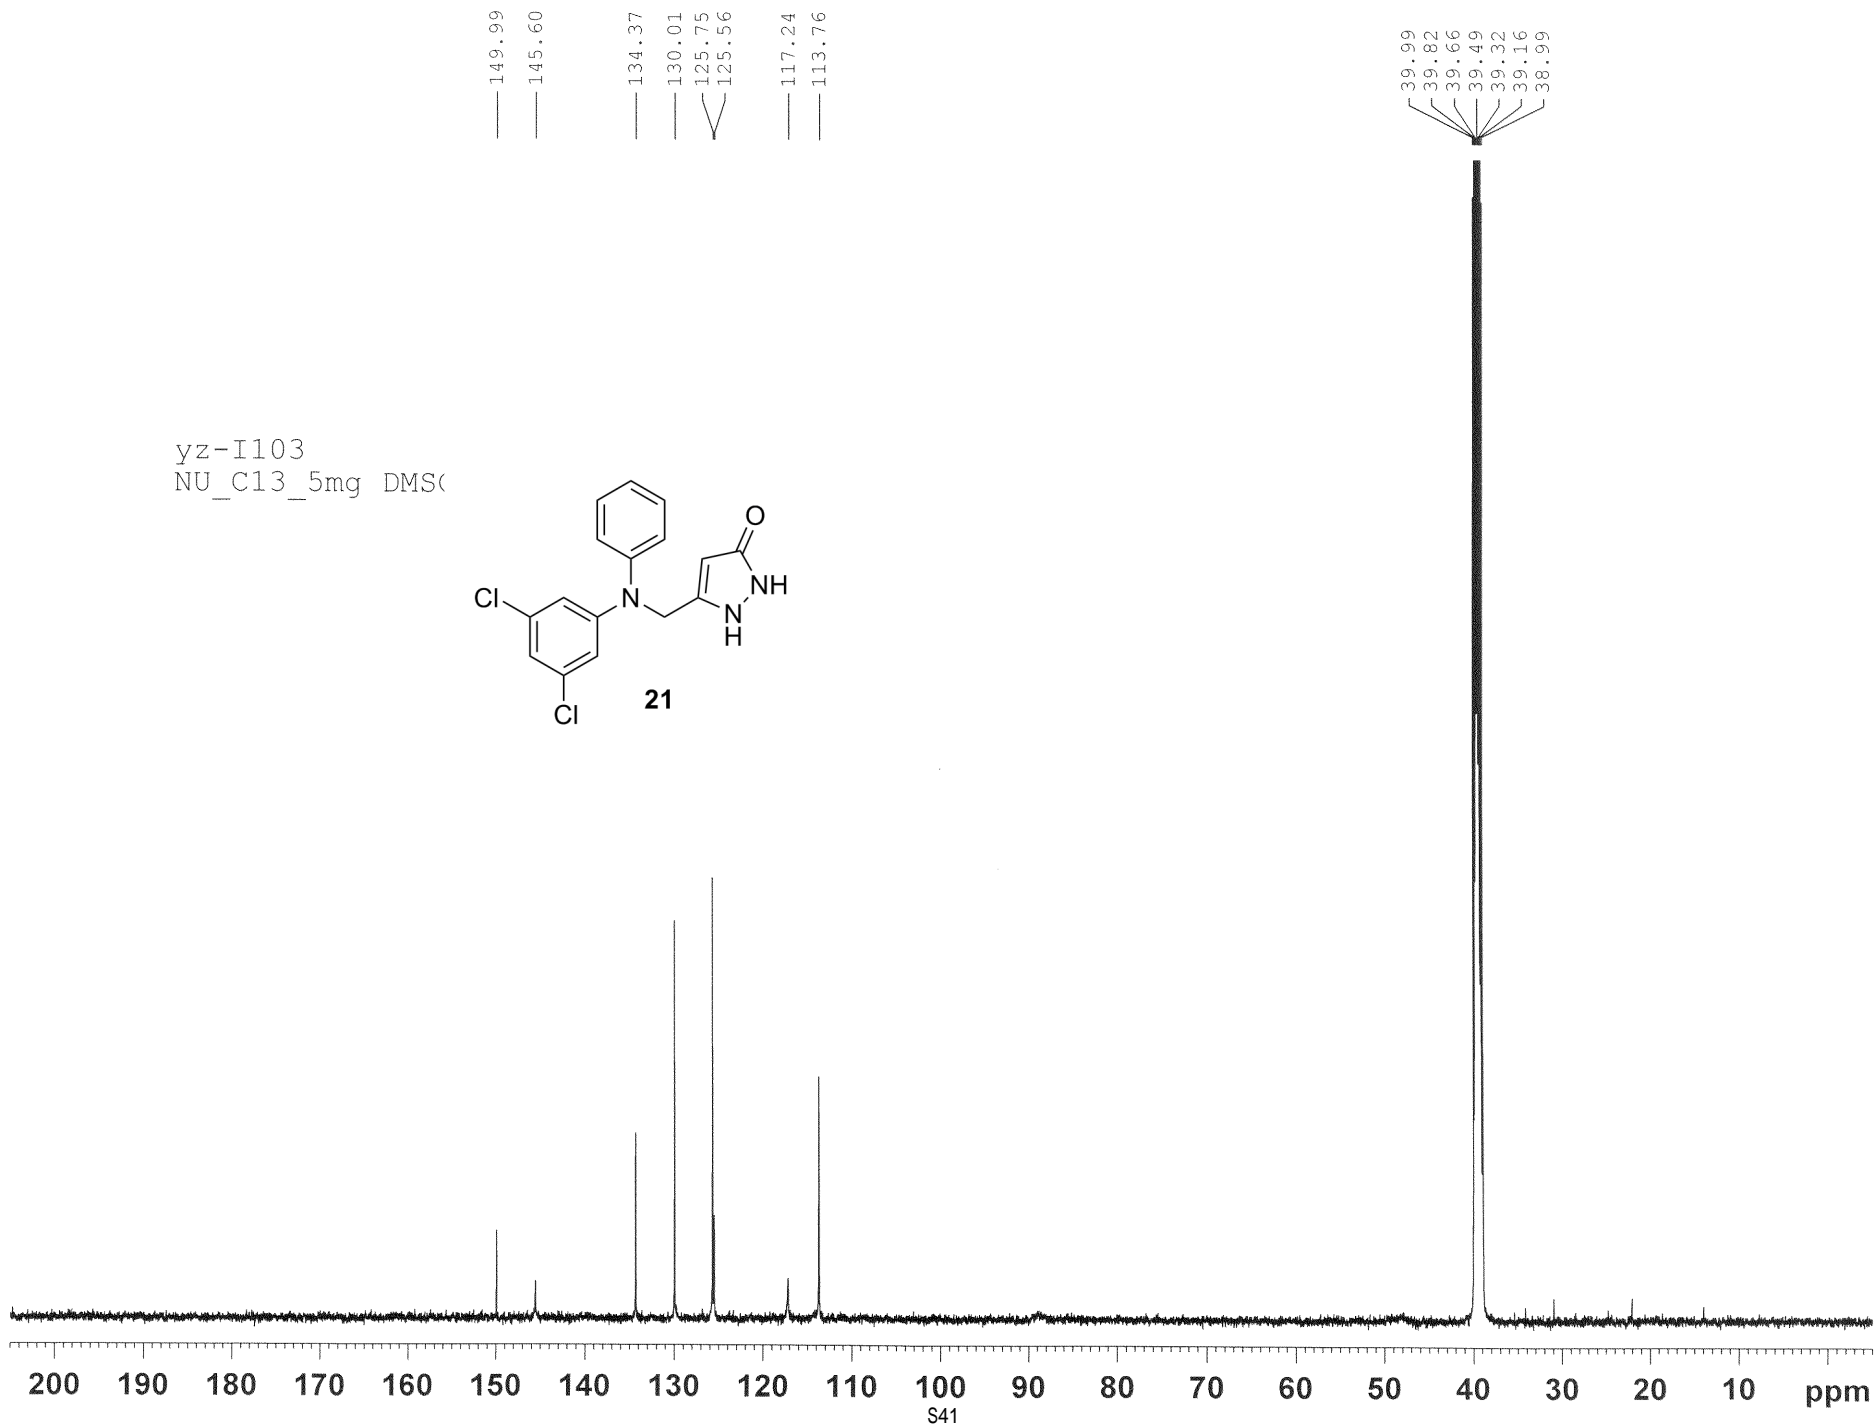

yz-I134  
PROTON DMSO

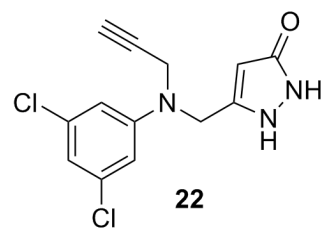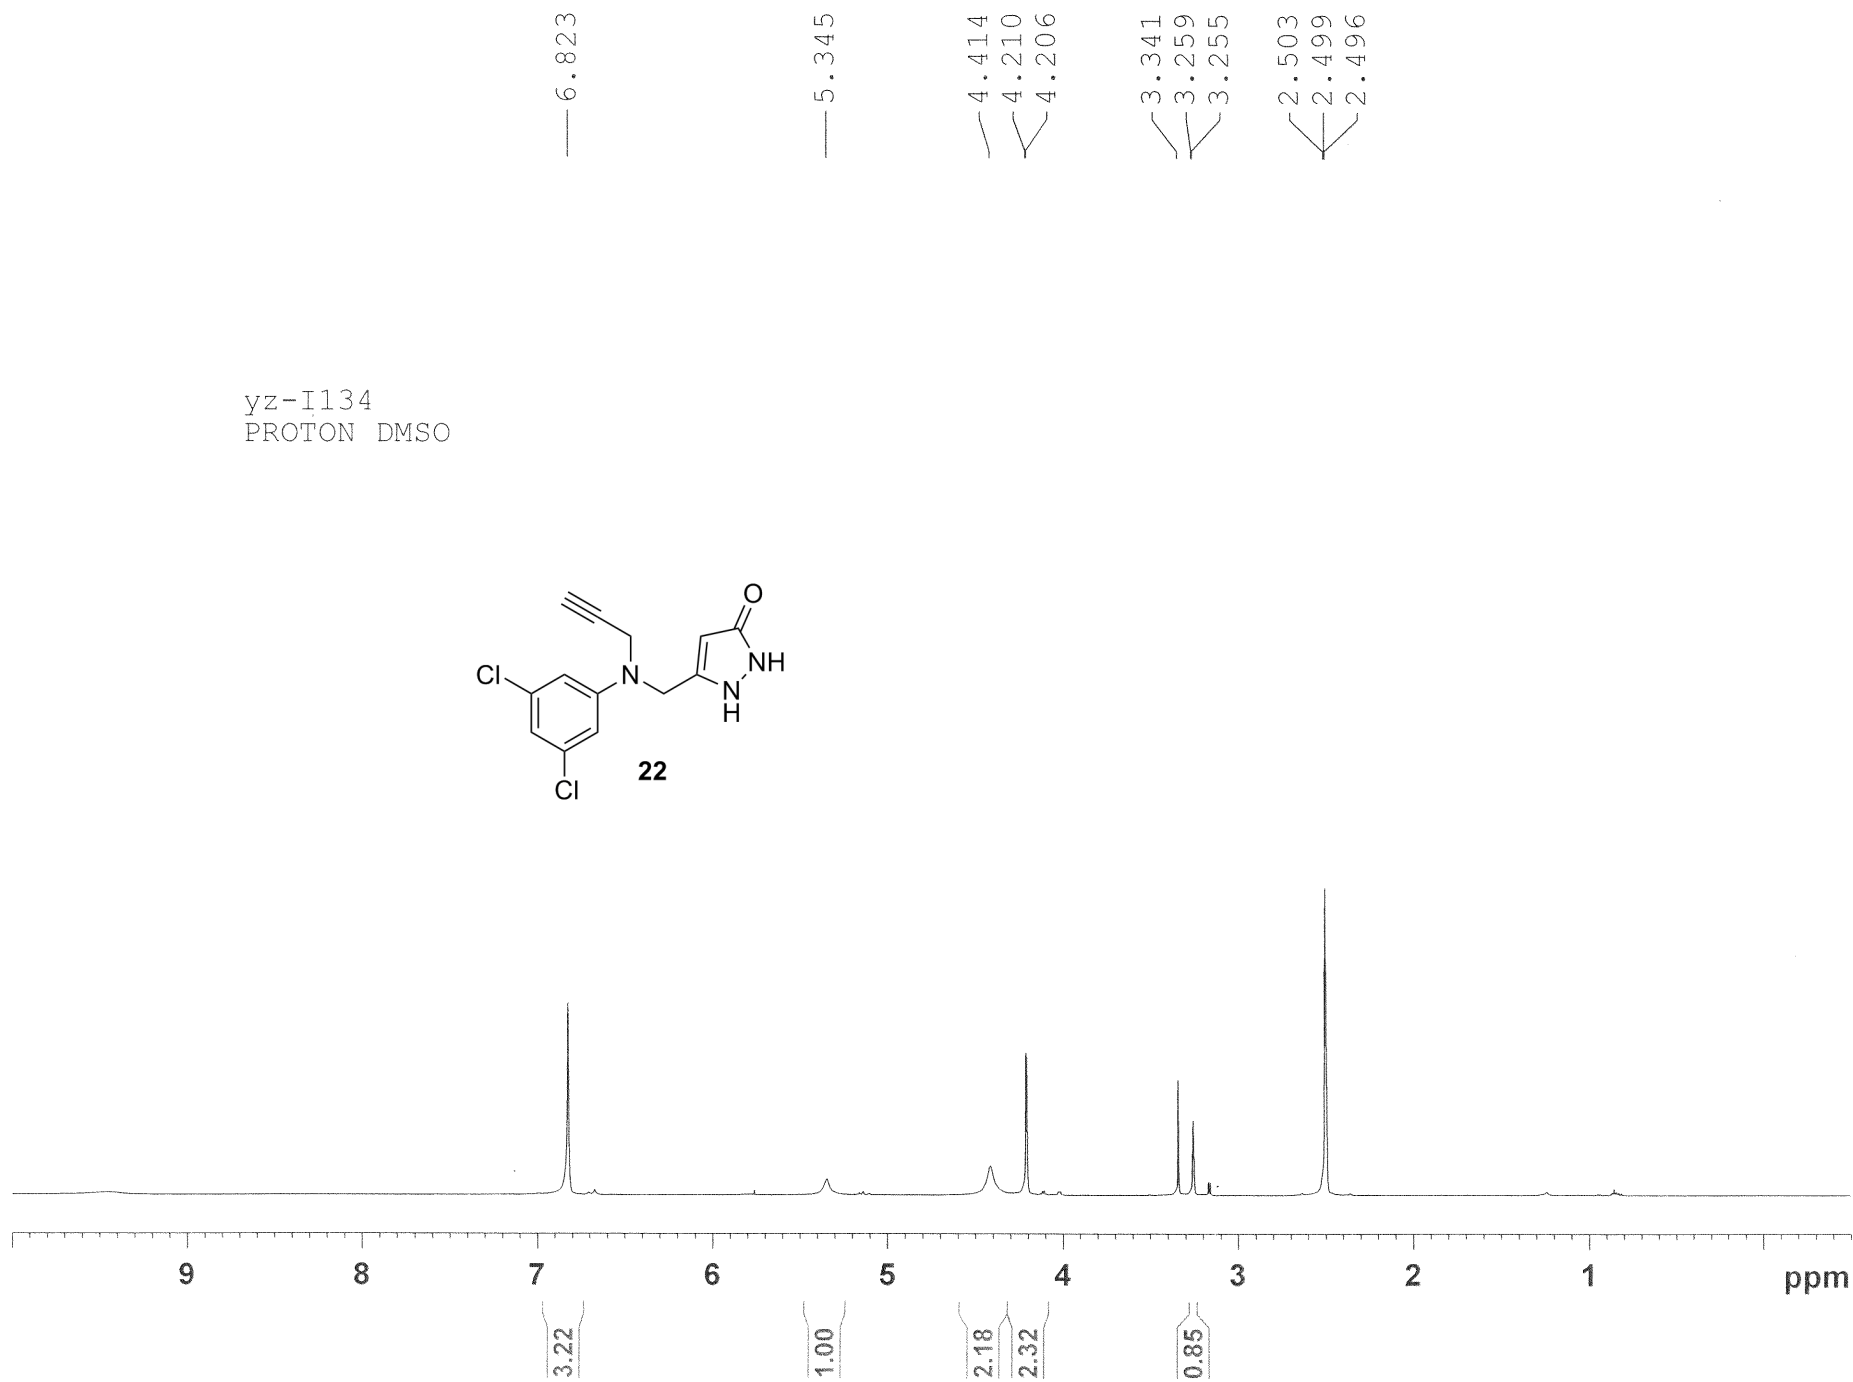

yz-I134  
NU\_C13\_5mg DMSO

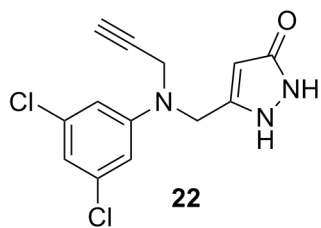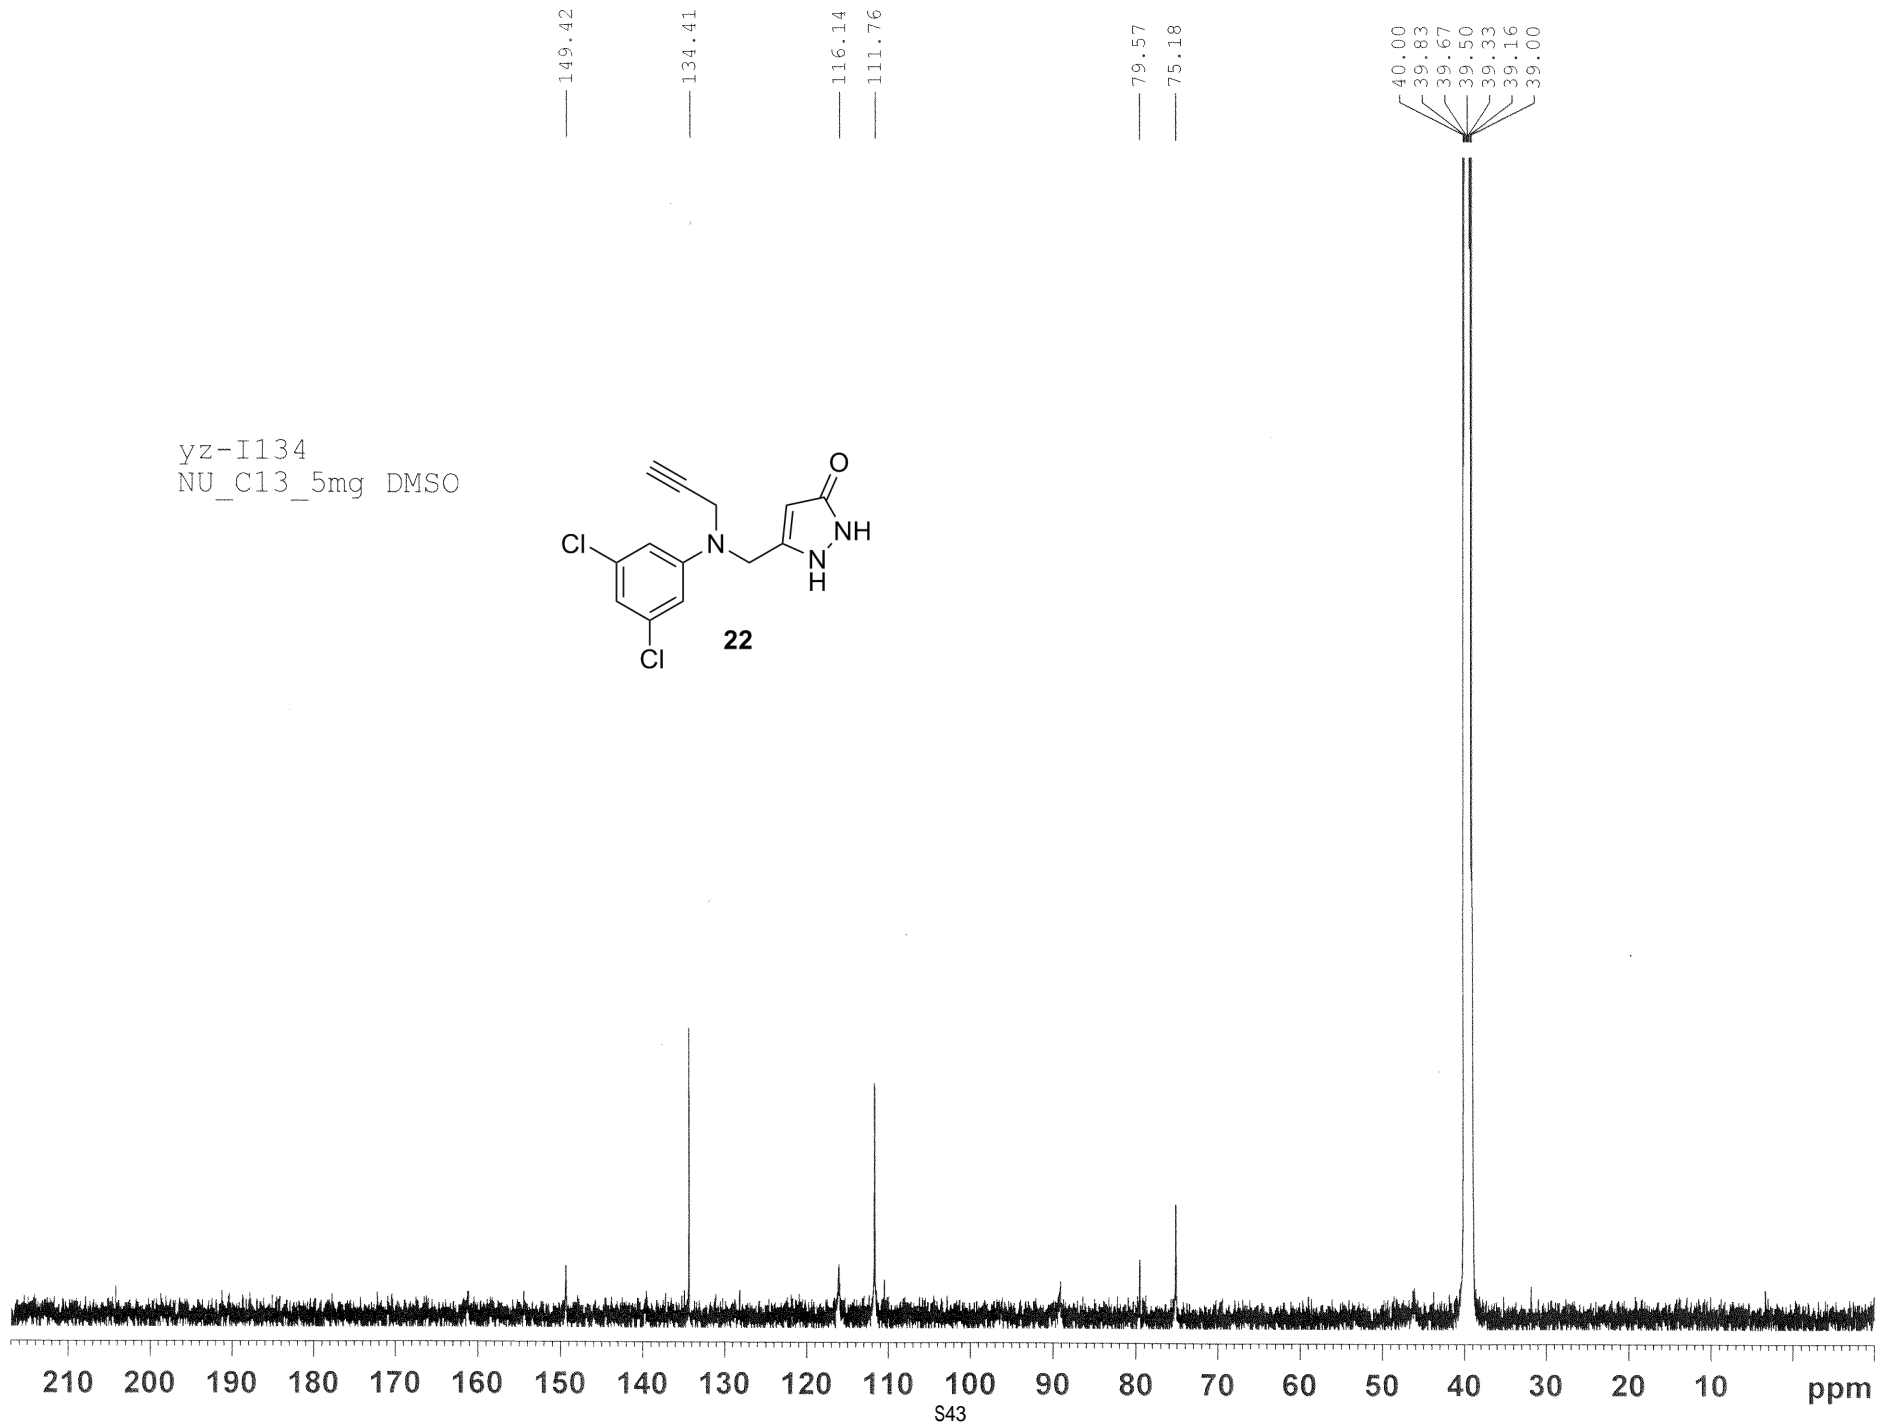

— 11.351

— 9.405

 6.688  
 6.685  
 6.665  
 6.661

— 5.327

 3.556  
 3.541  
 3.526  
 3.346  
 2.849  
 2.654  
 2.638  
 2.624  
 2.506  
 2.502  
 2.499  
 2.495  
 2.492
yz-II6  
PROTON DMSO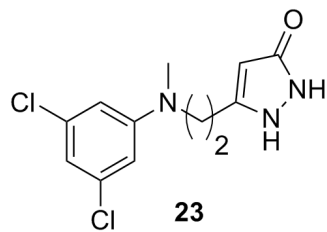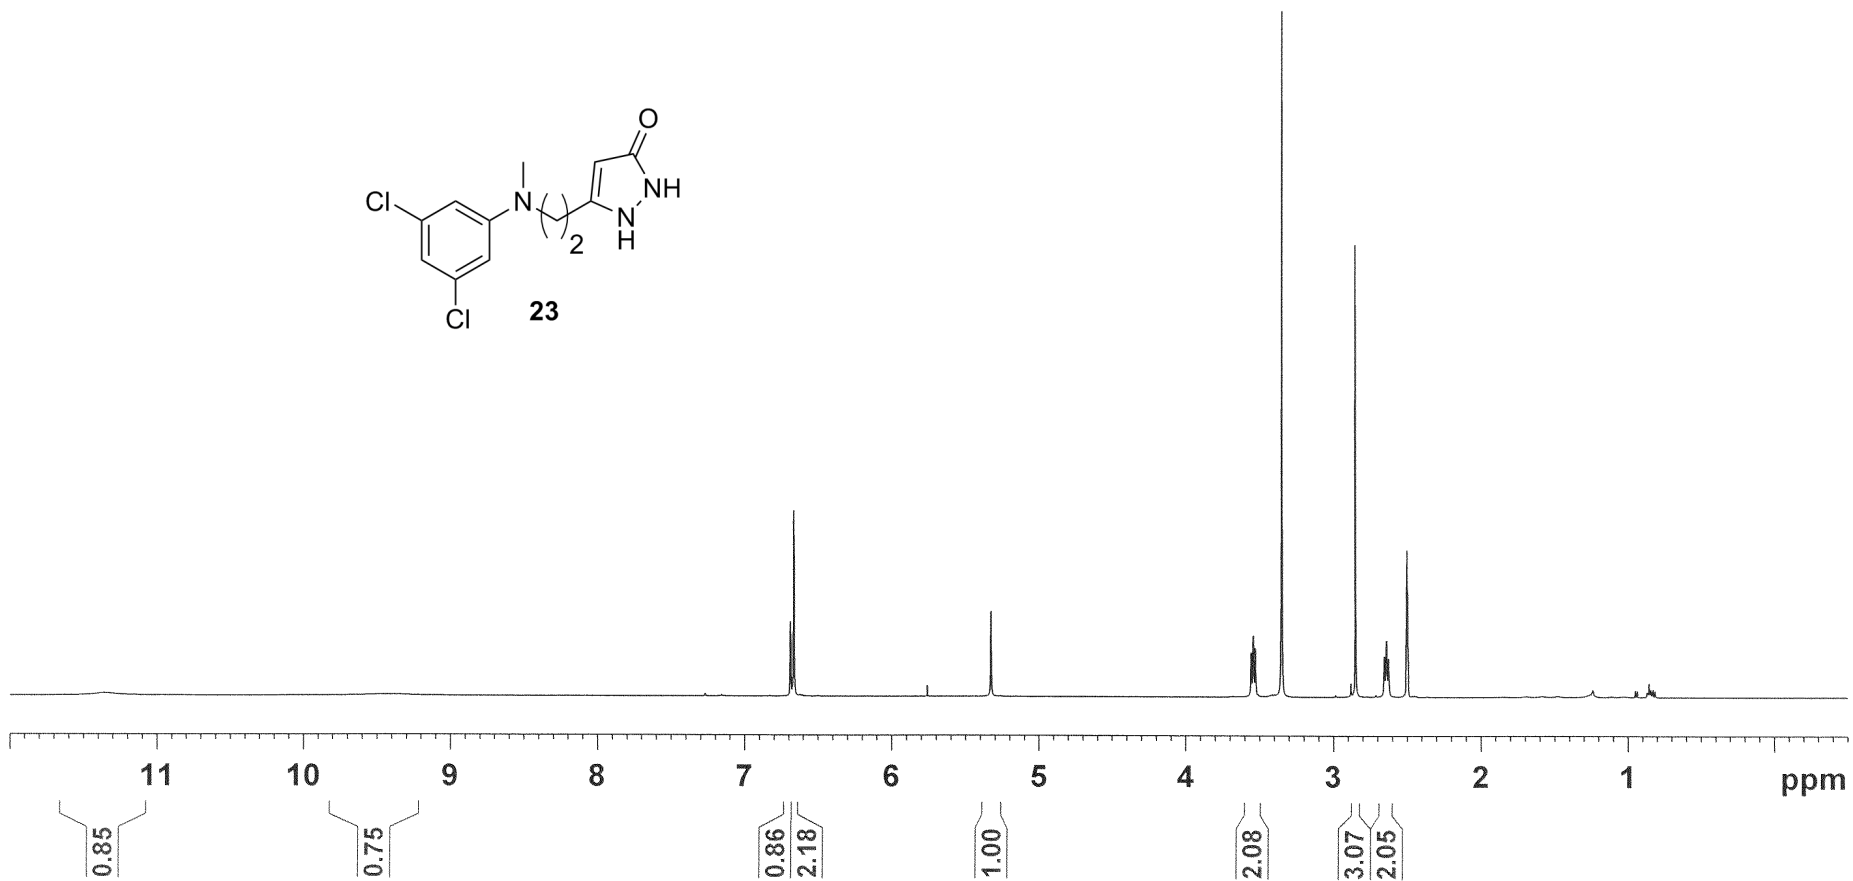

yz-II6  
NU\_C13\_2mg DMSO

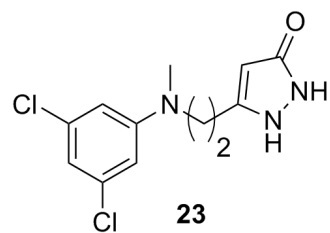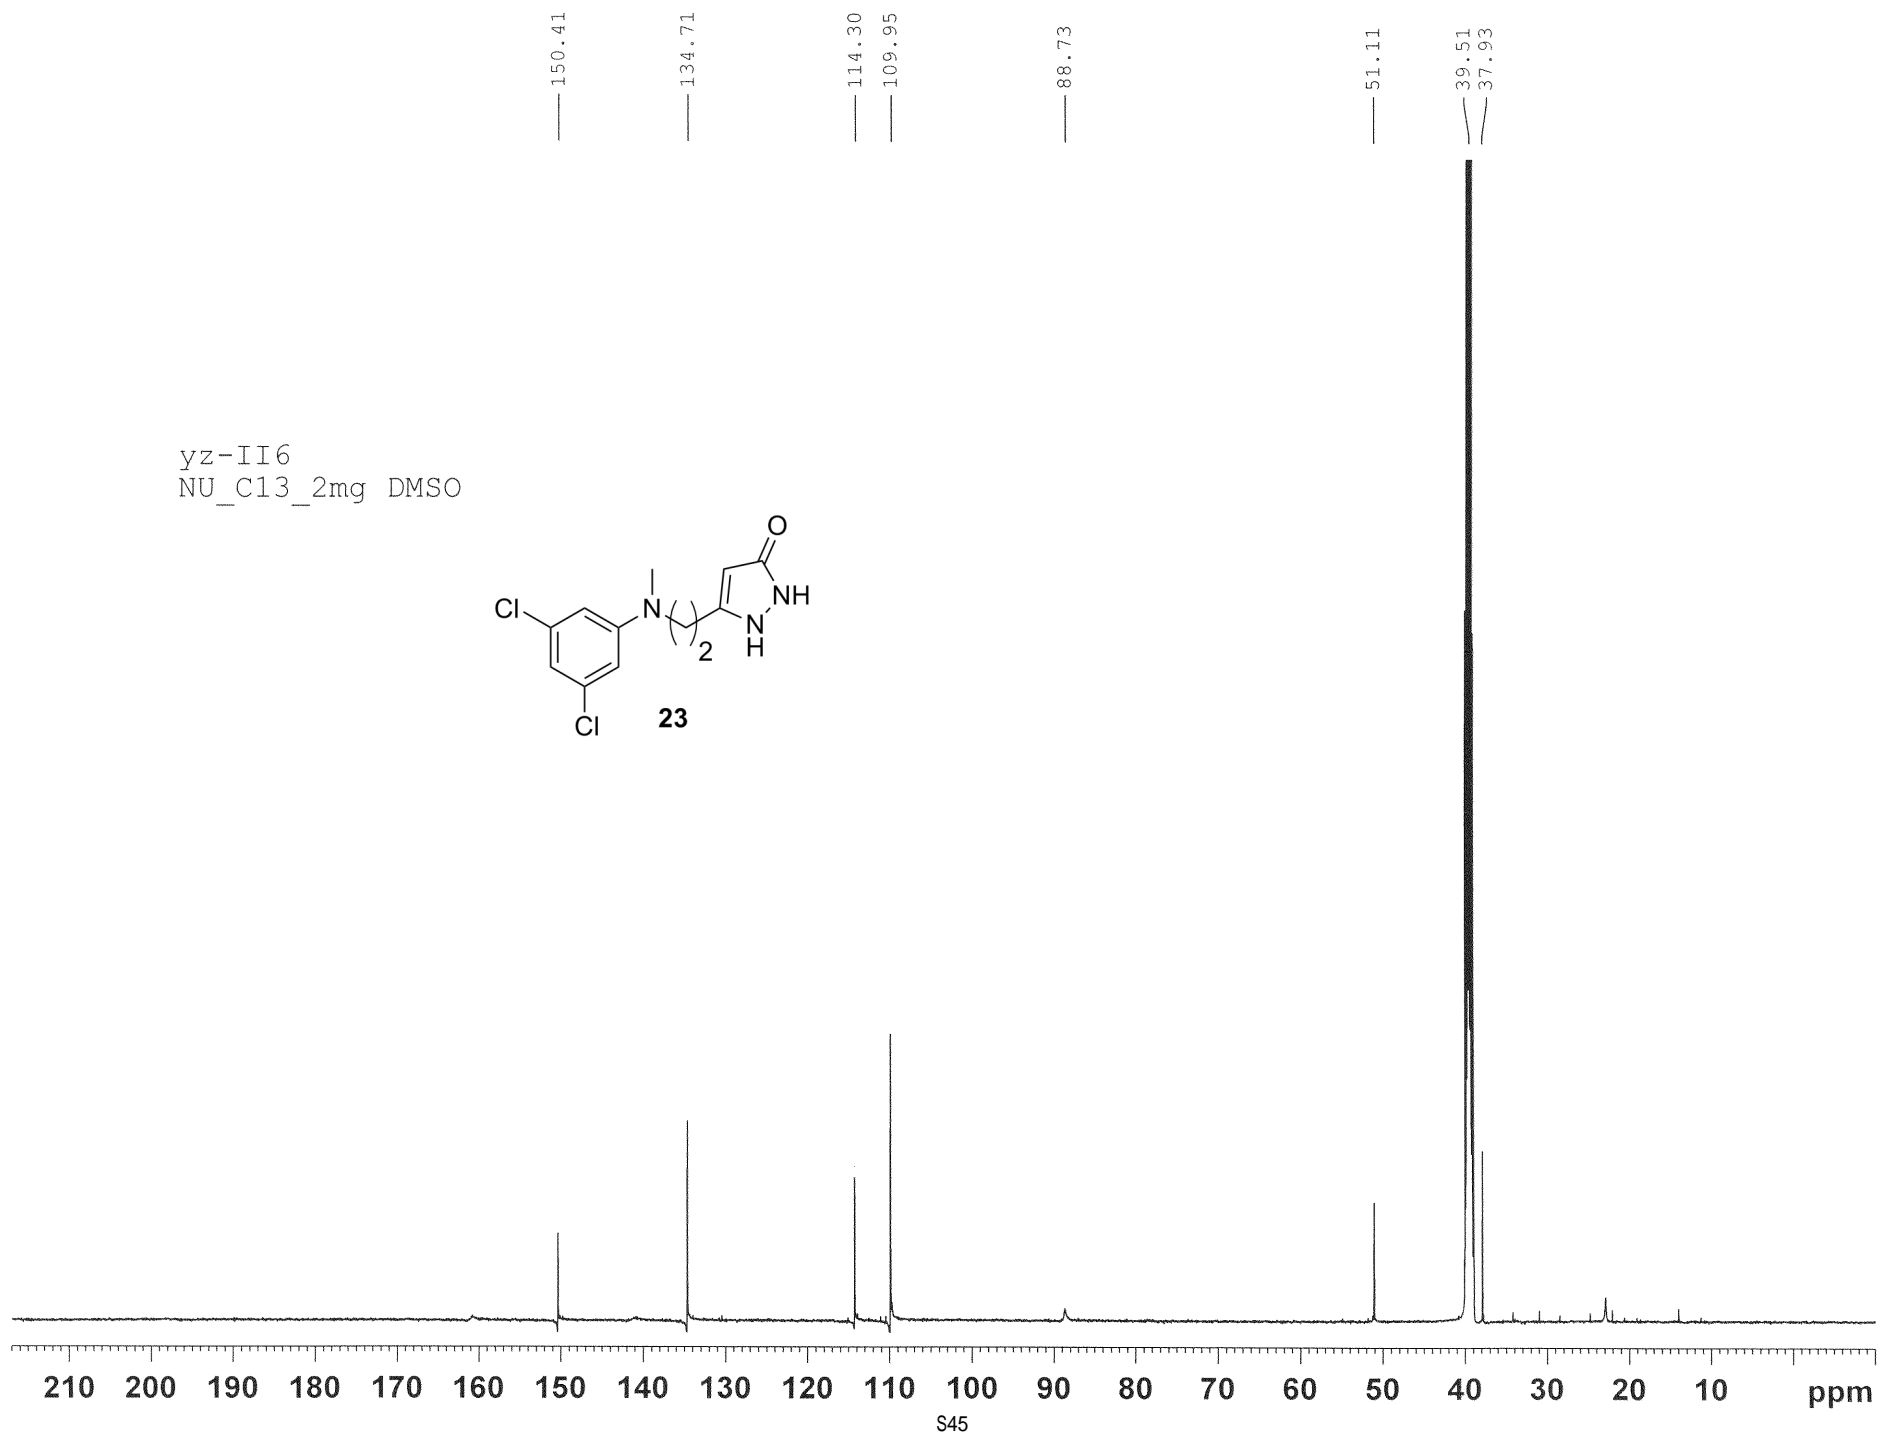

— 11.266

— 9.301

 6.665  
 6.662  
 6.614  
 6.611

— 5.260

 3.338  
 3.325  
 3.310  
 2.883  
 2.867  
 2.506  
 2.503  
 2.499  
 2.496  
 2.493  
 2.472  
 2.457  
 2.442  
 1.758  
 1.744  
 1.729

 yz-III18  
 PROTON DMSC
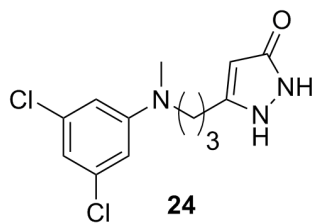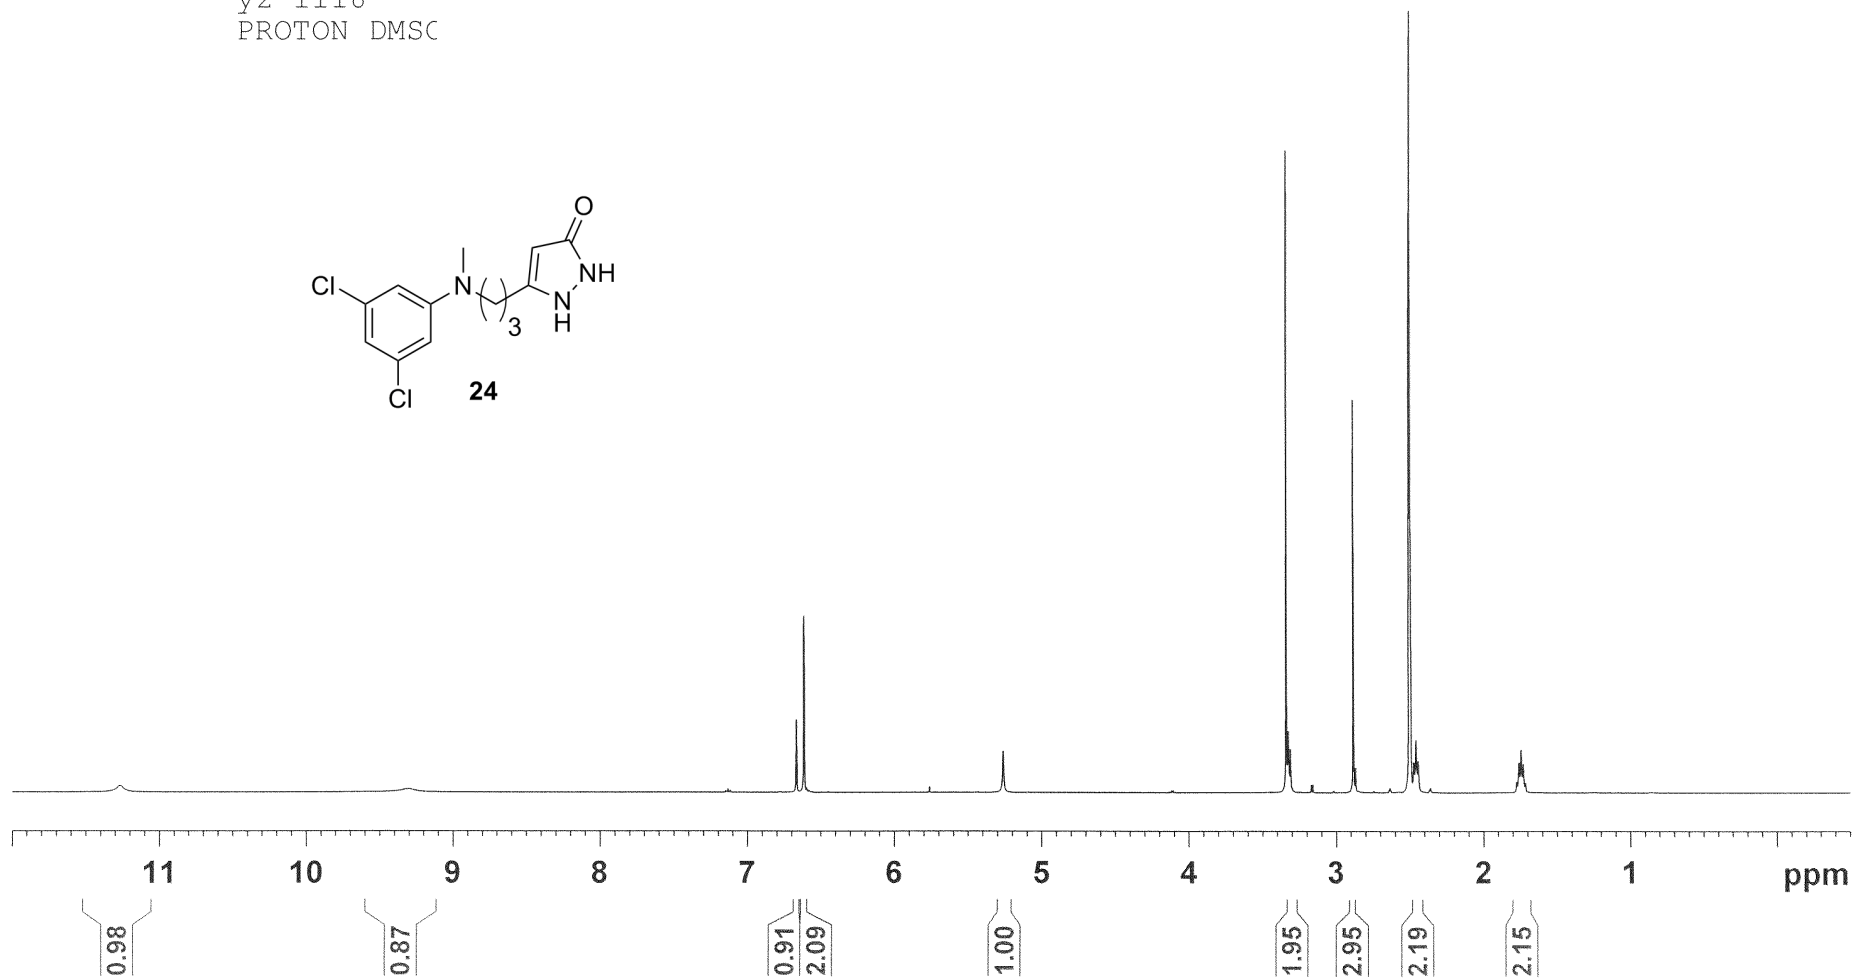

yz-III18  
NU\_C13\_2mg DMSO

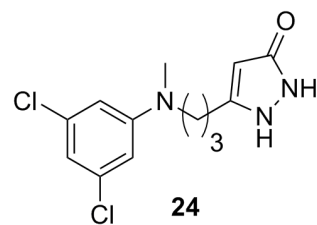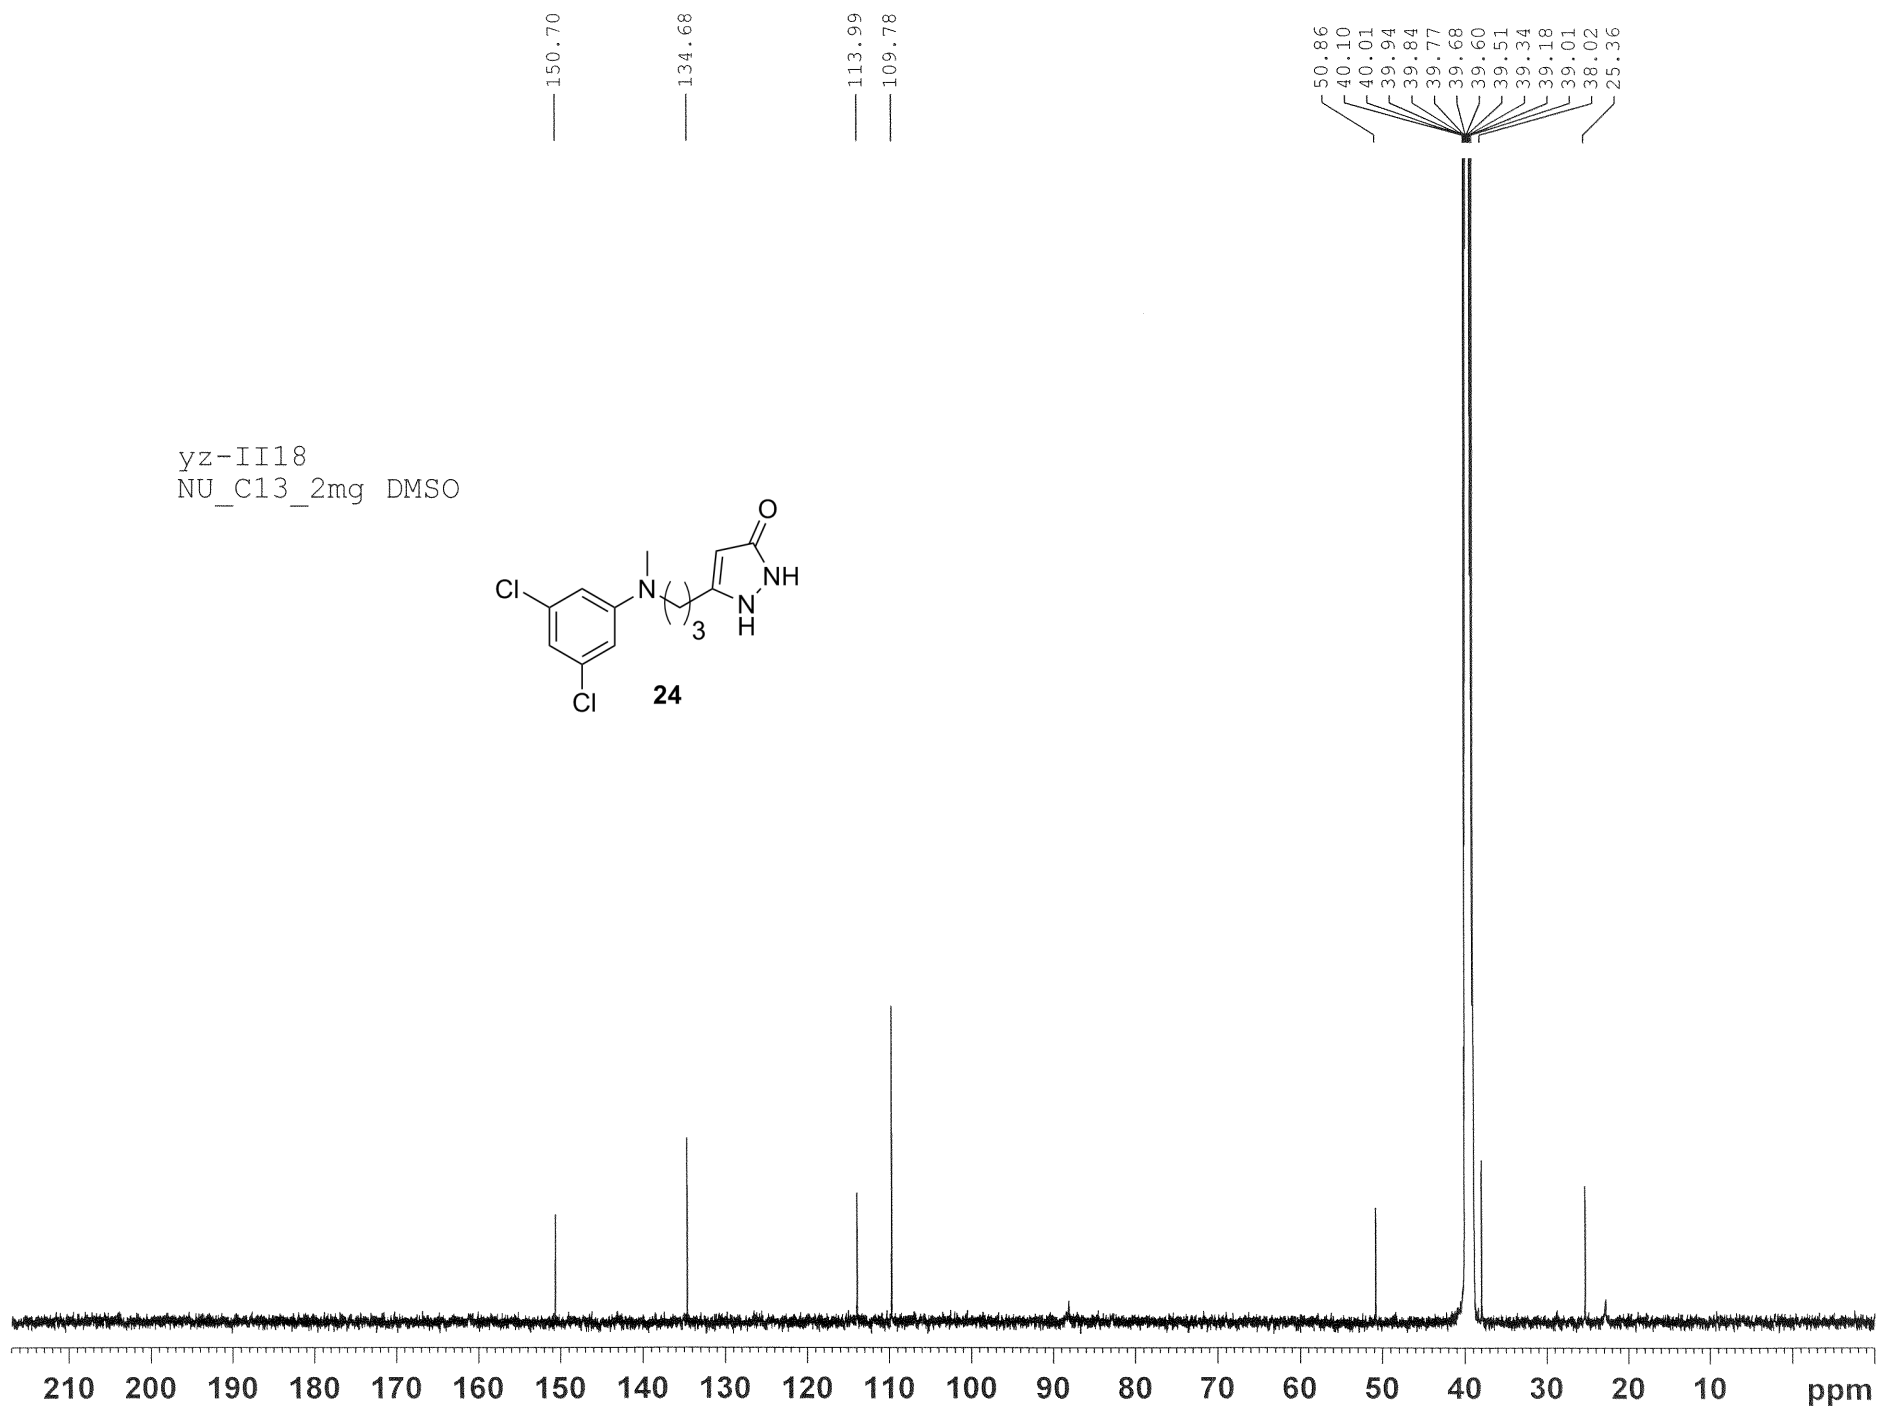

7.024  
7.010  
6.996  
6.981  
6.965  
6.627  
6.612  
6.591  
6.576  
6.562

— 5.314

4.118  
3.356  
3.257  
3.241  
3.224  
2.861  
2.845  
2.828  
2.502  
2.499  
2.496

yz-III169  
PROTON DMSC

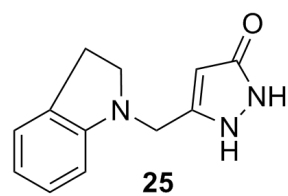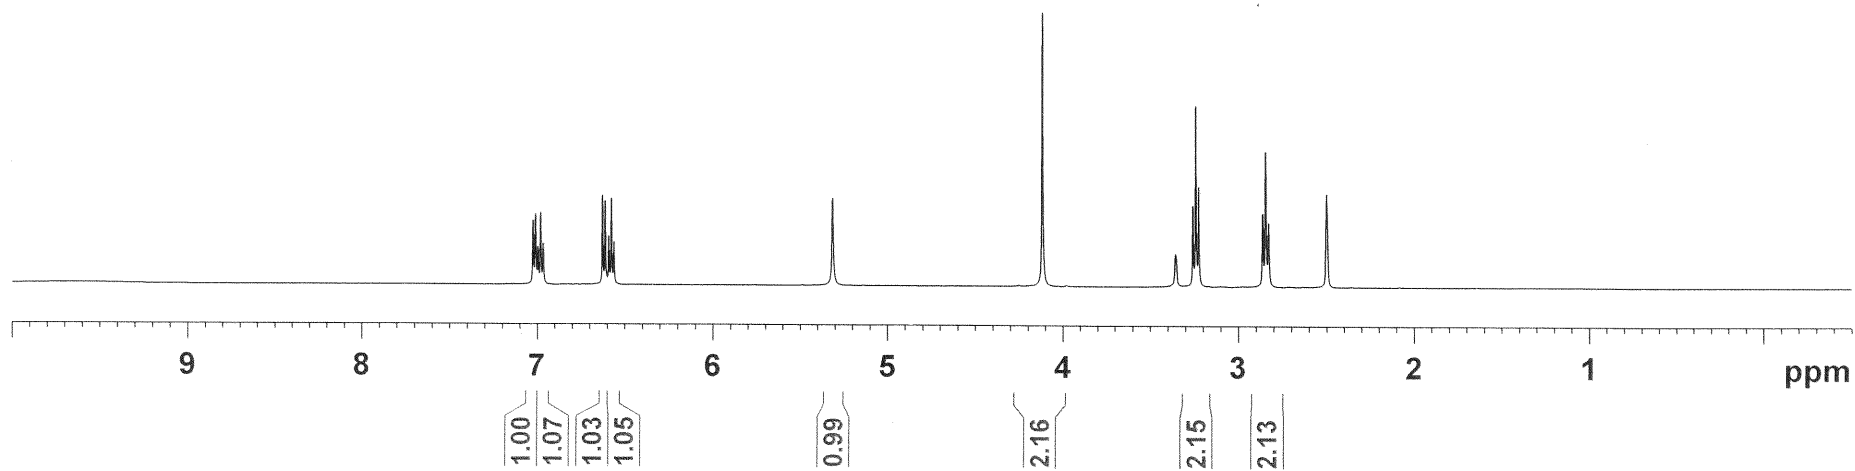



yz-III169  
NU\_C13\_5mg DMSO

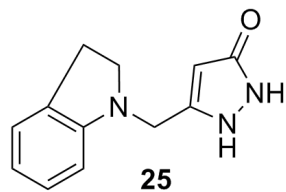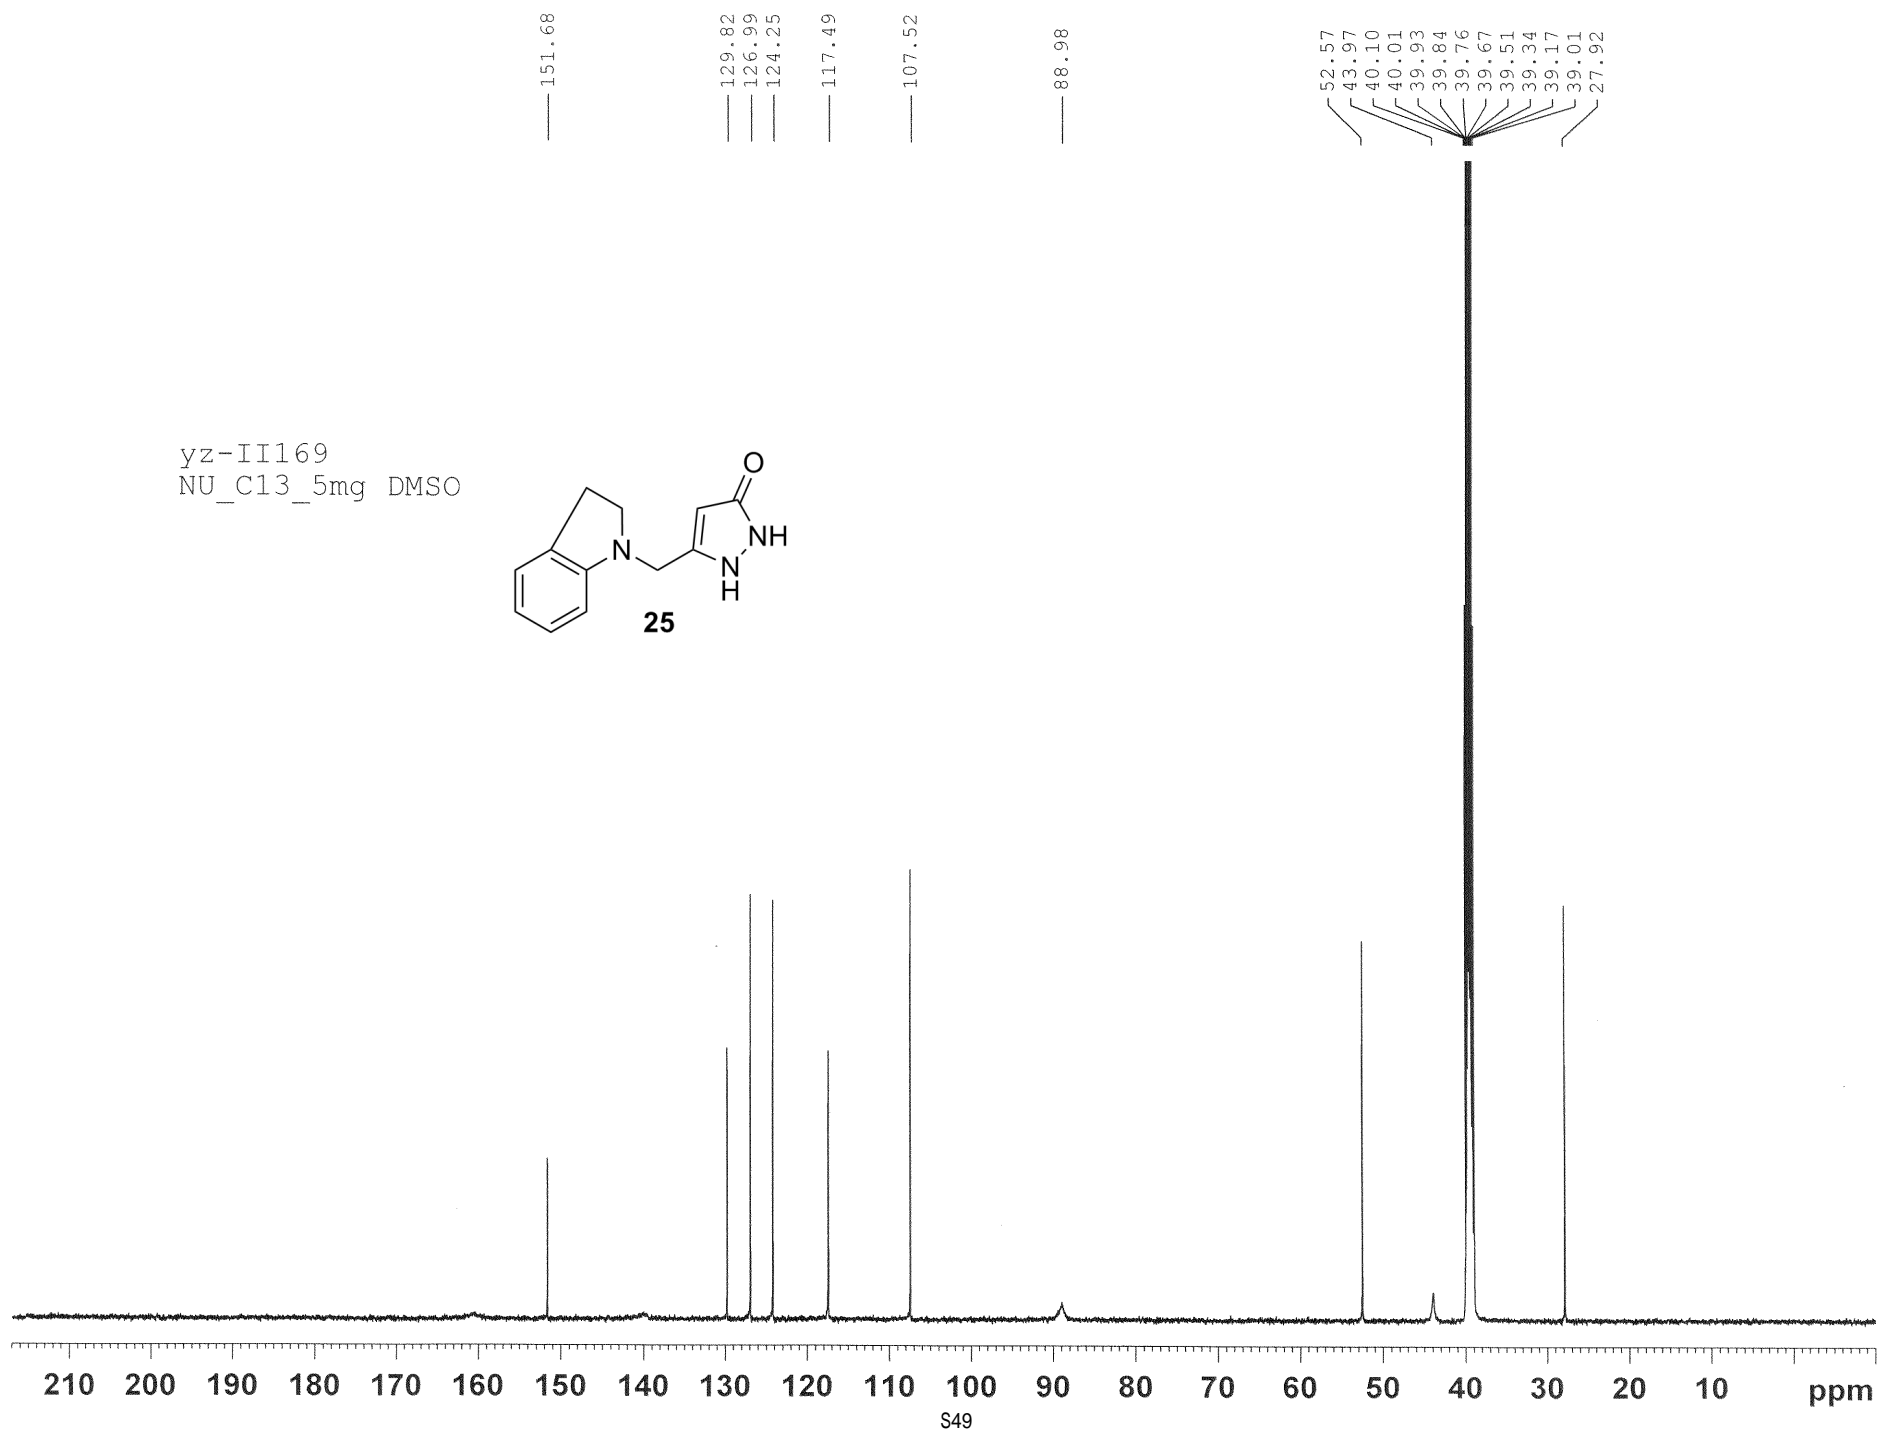

yz-III168  
PROTON DMSO

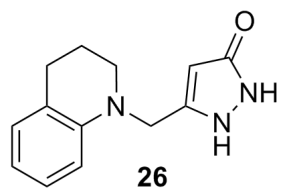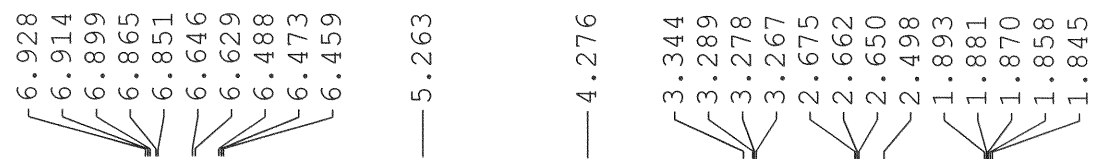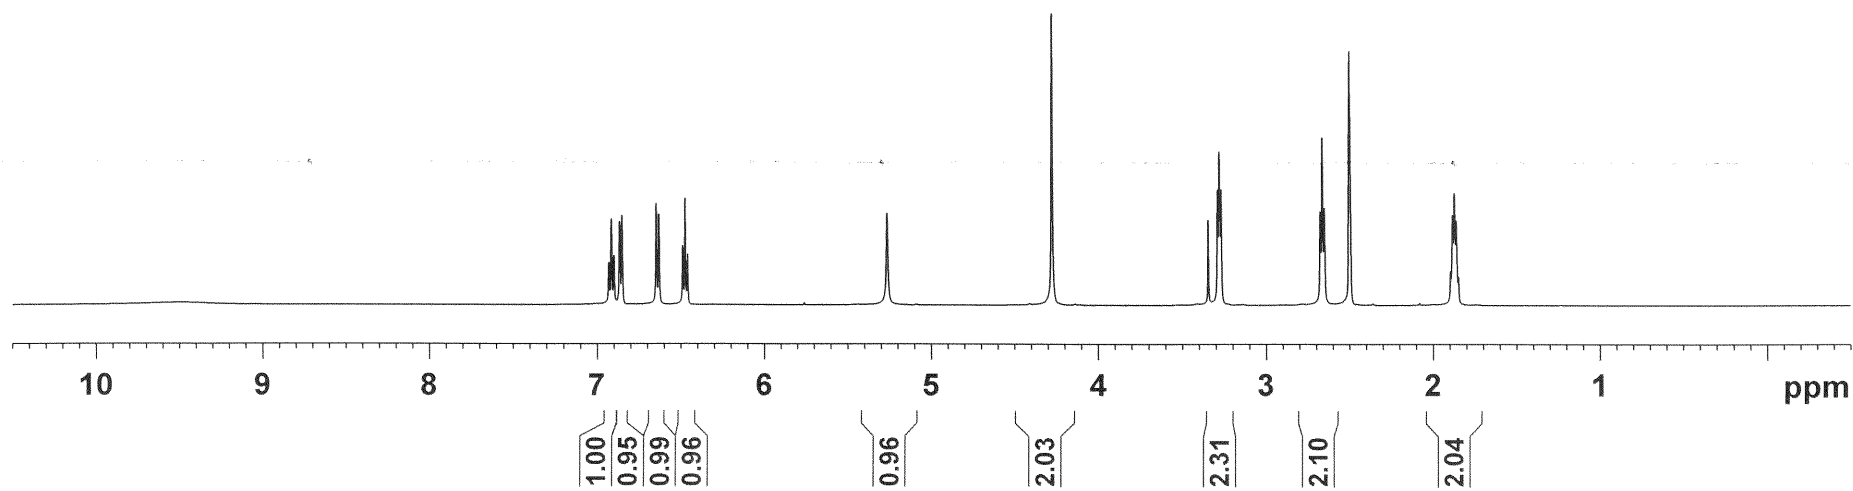

yz-III168  
NU\_C13\_5mg DMSO

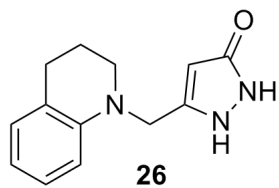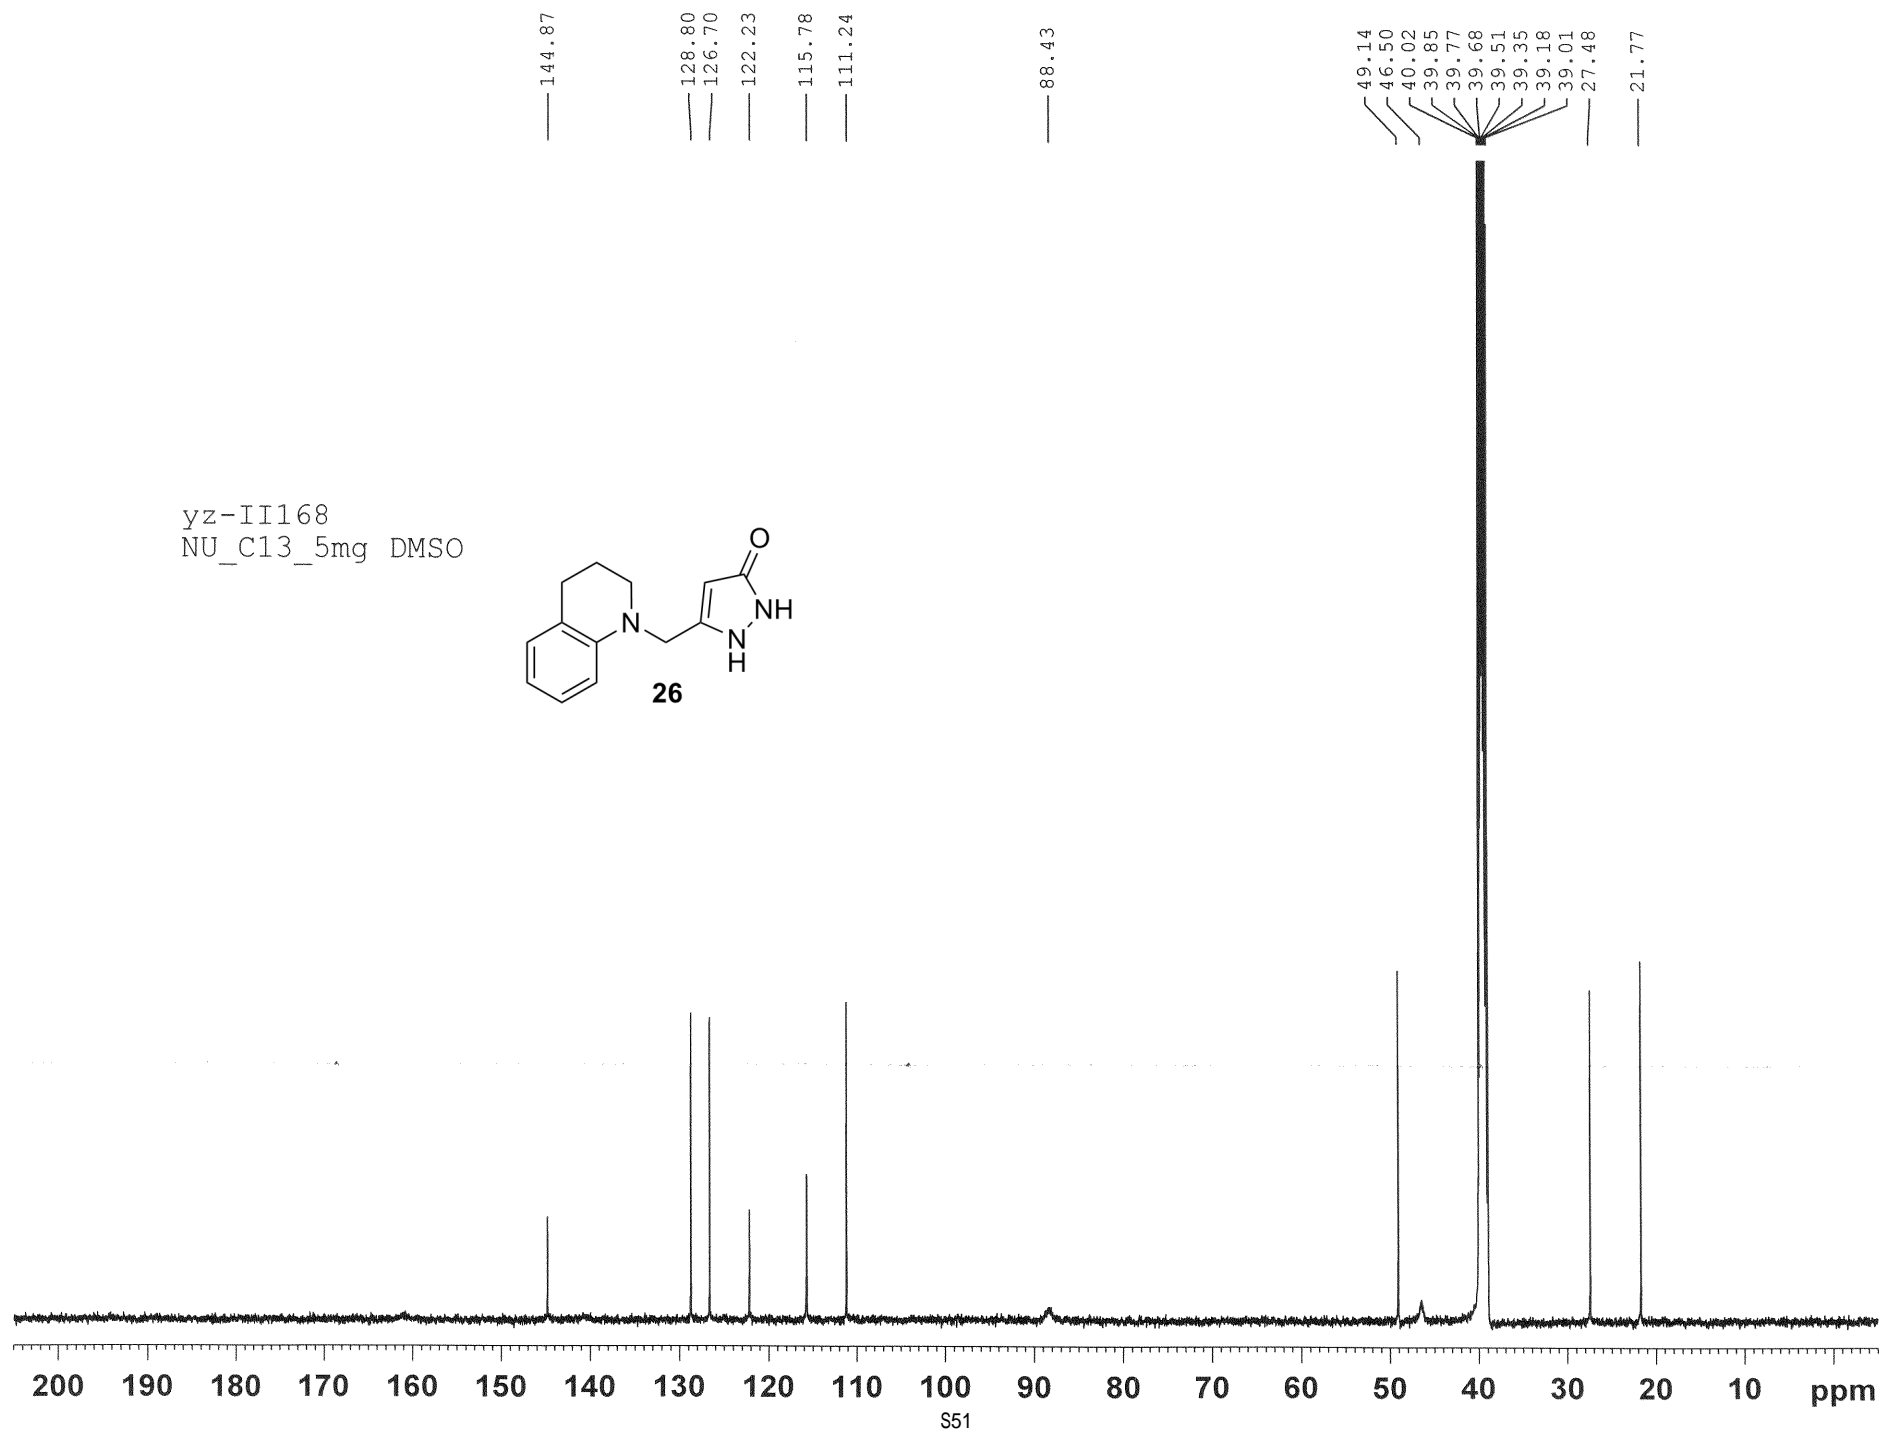

yz-I116  
PROTON DMSO

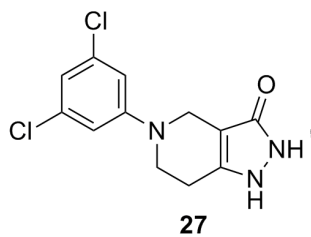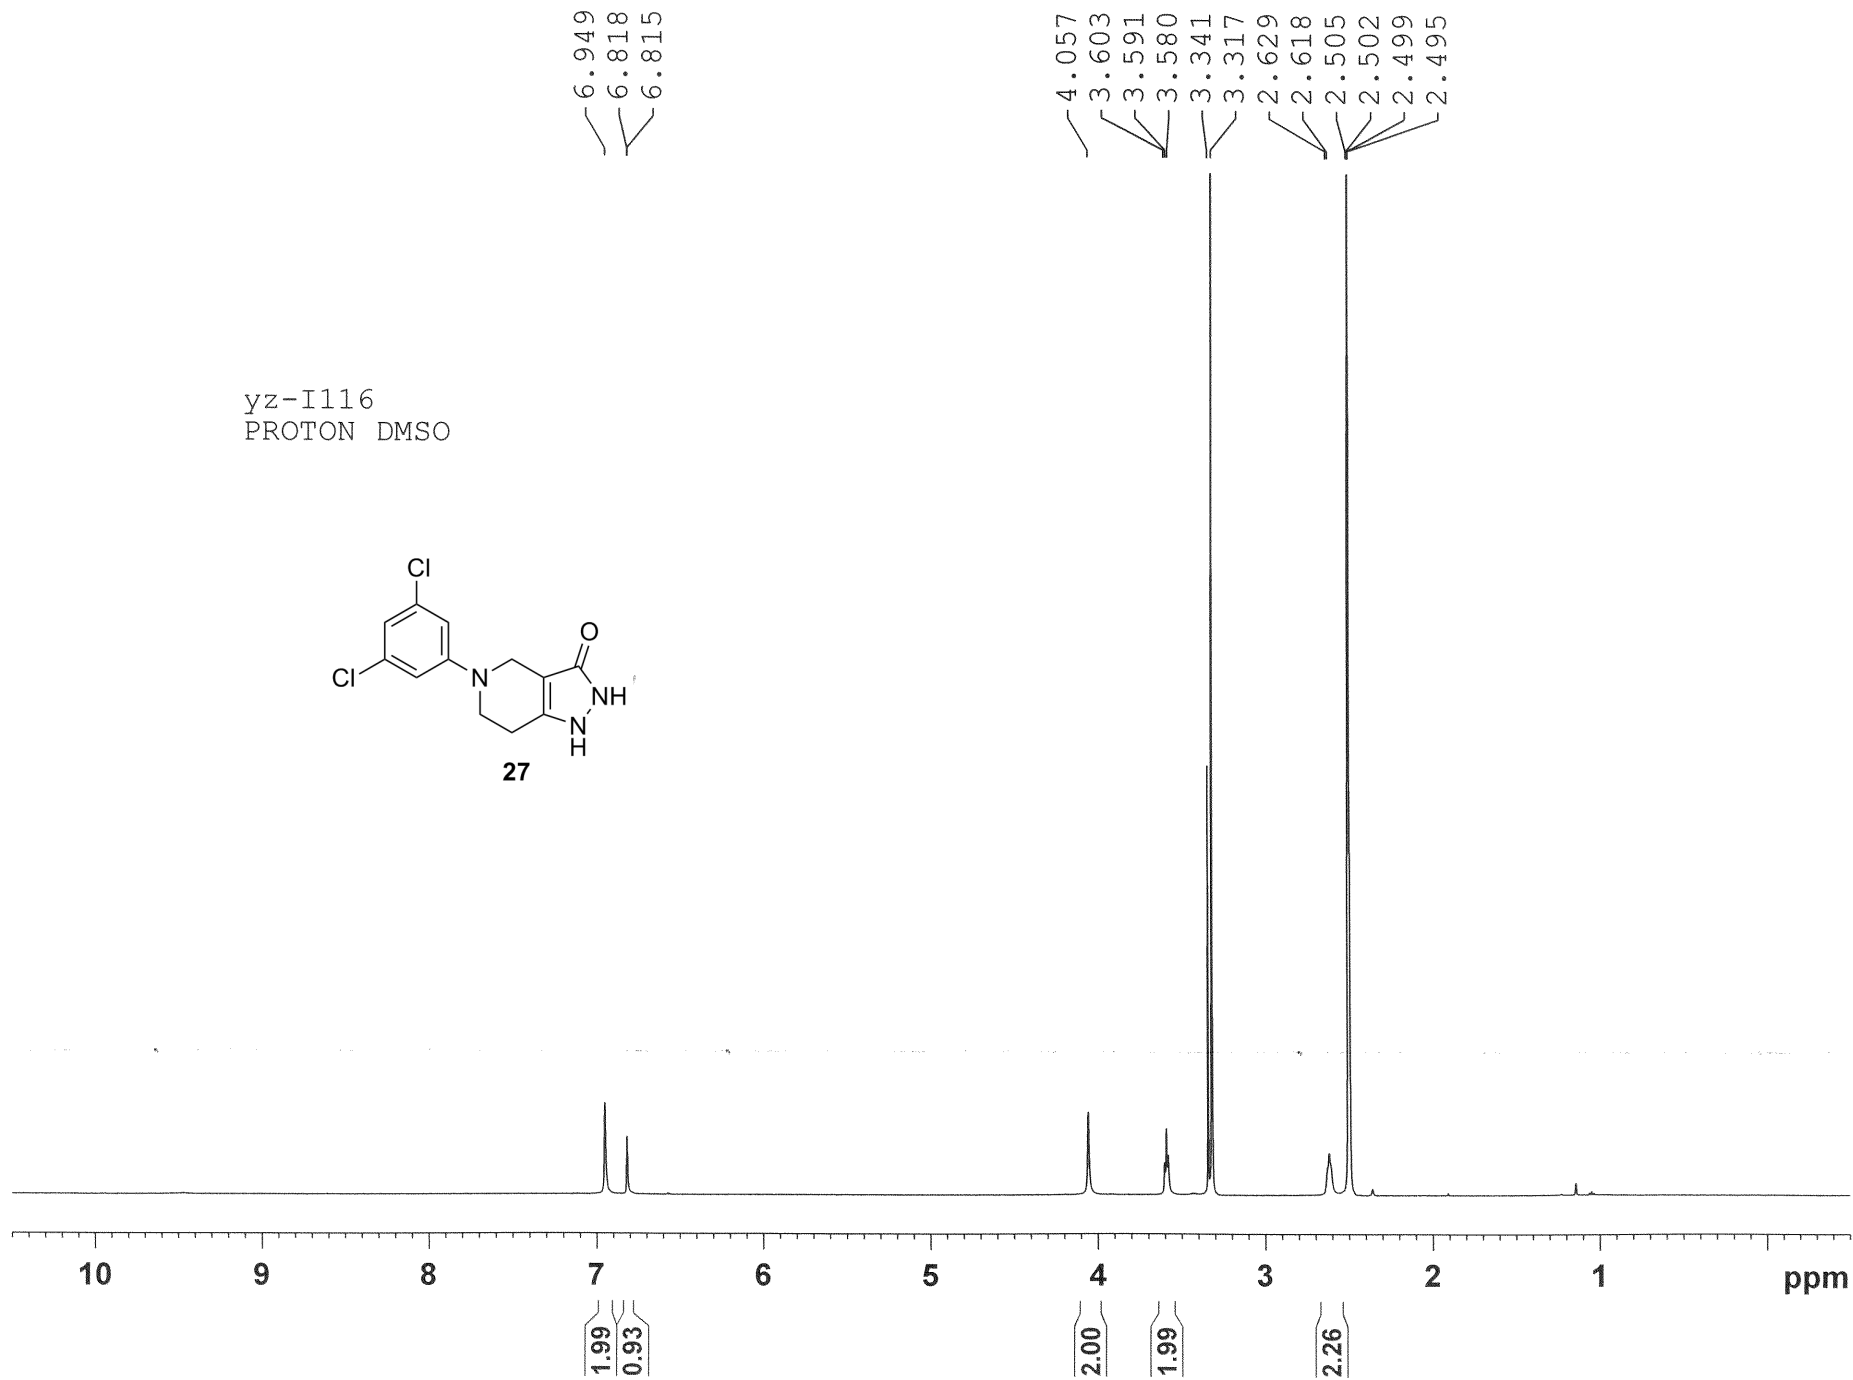

NU\_C13\_2mg DMSO

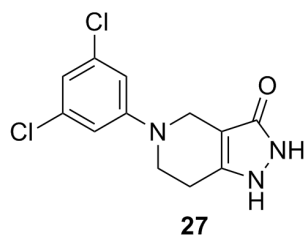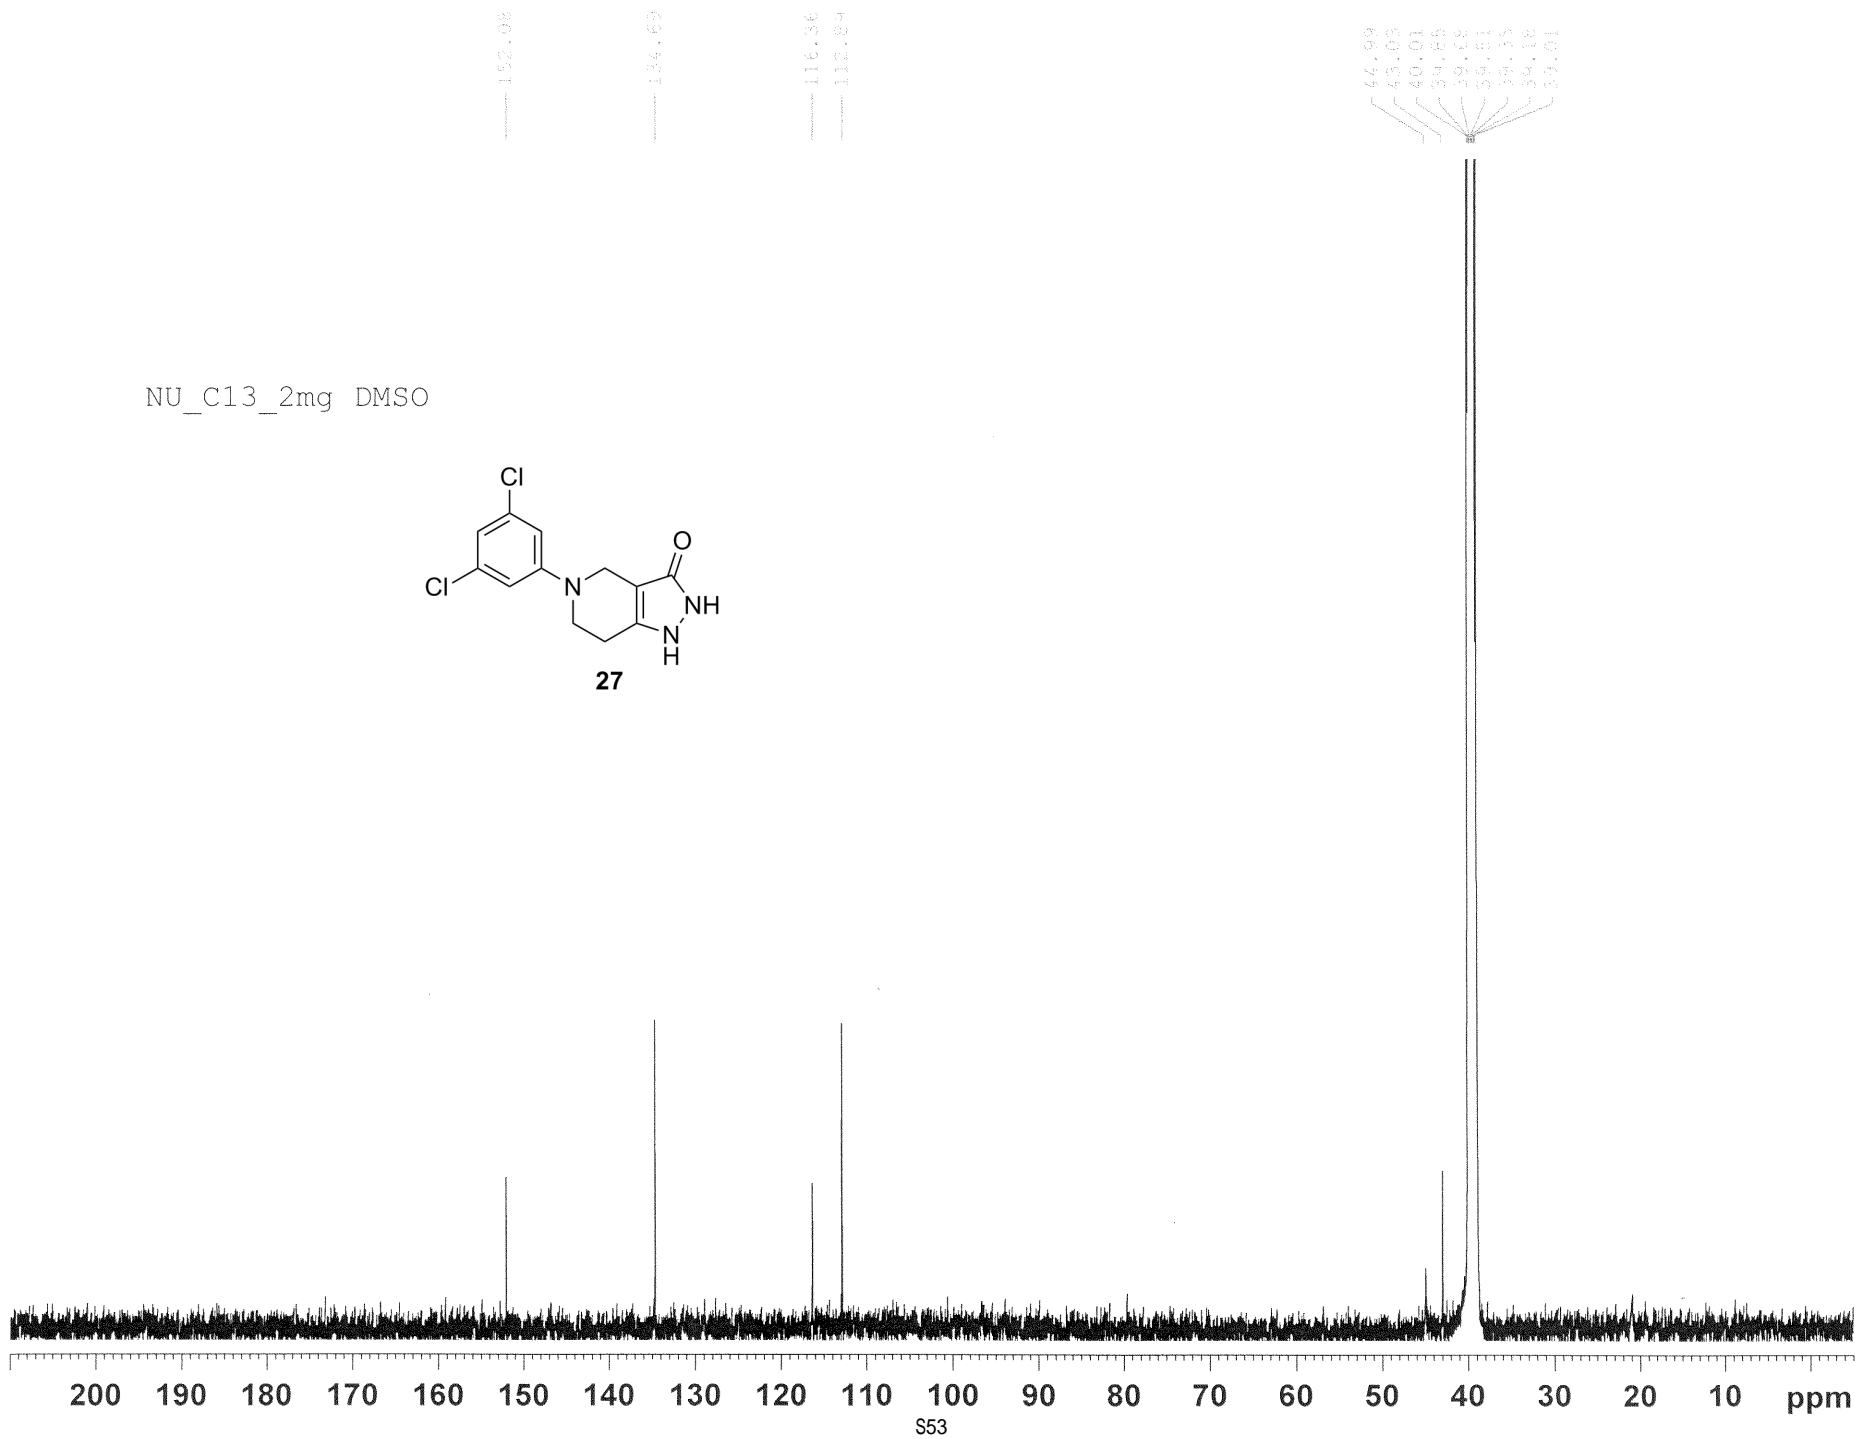

6.965  
6.962  
6.831  
6.828

4.255  
3.566  
3.555  
3.543  
3.349  
3.168  
3.158  
2.560  
2.502  
2.499  
2.495  
2.407  
2.397  
2.385

yz-II77  
PROTON DMSO

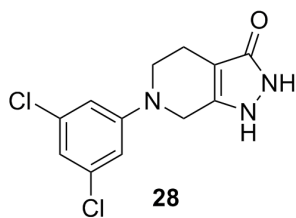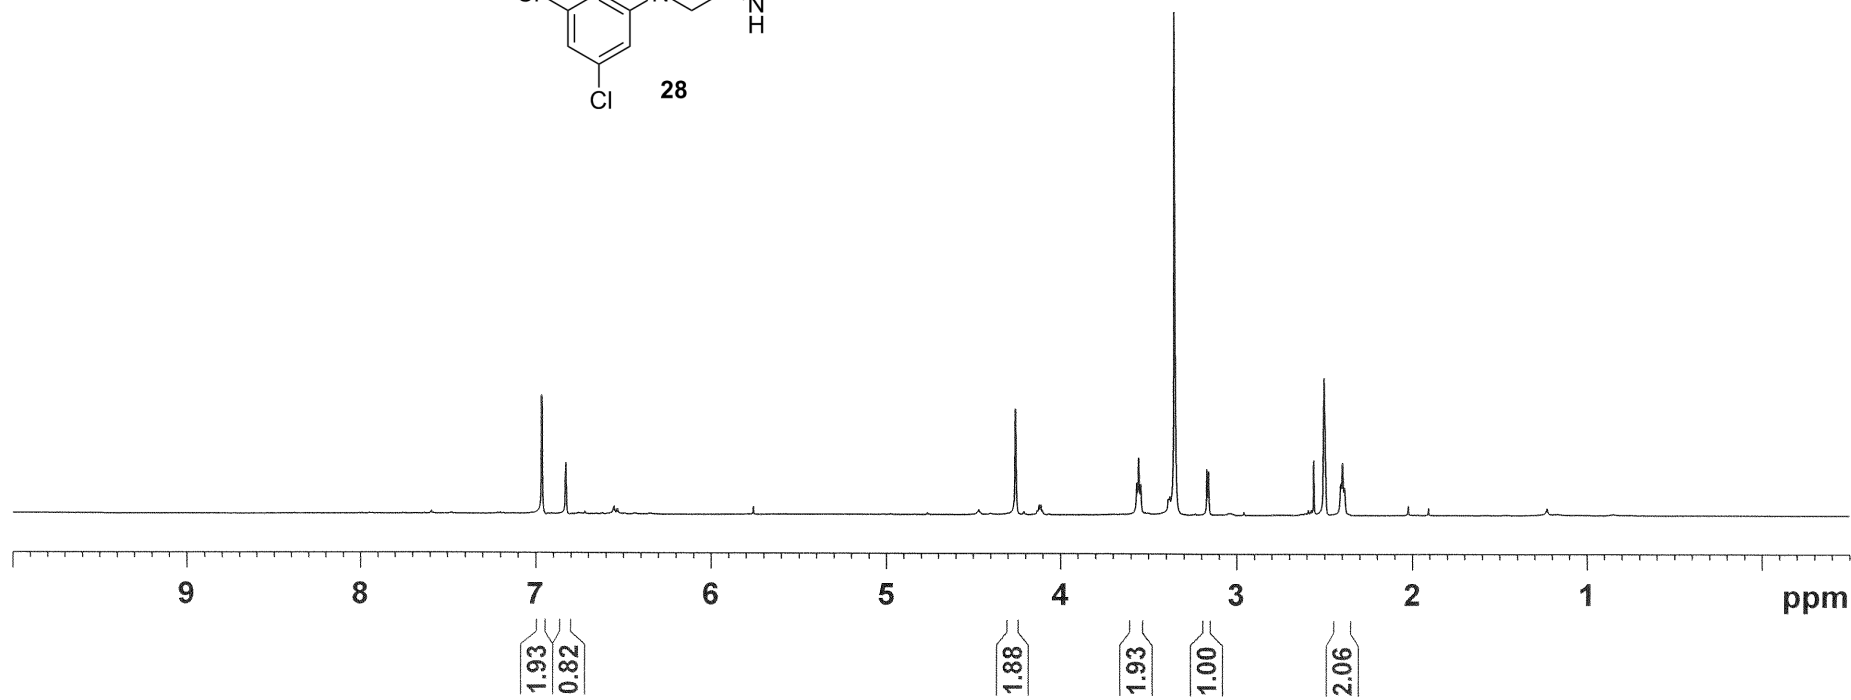

yz-II77  
NU\_C13\_2mg DMSO

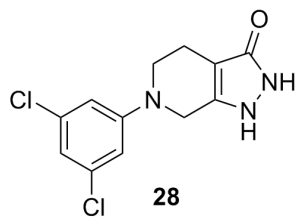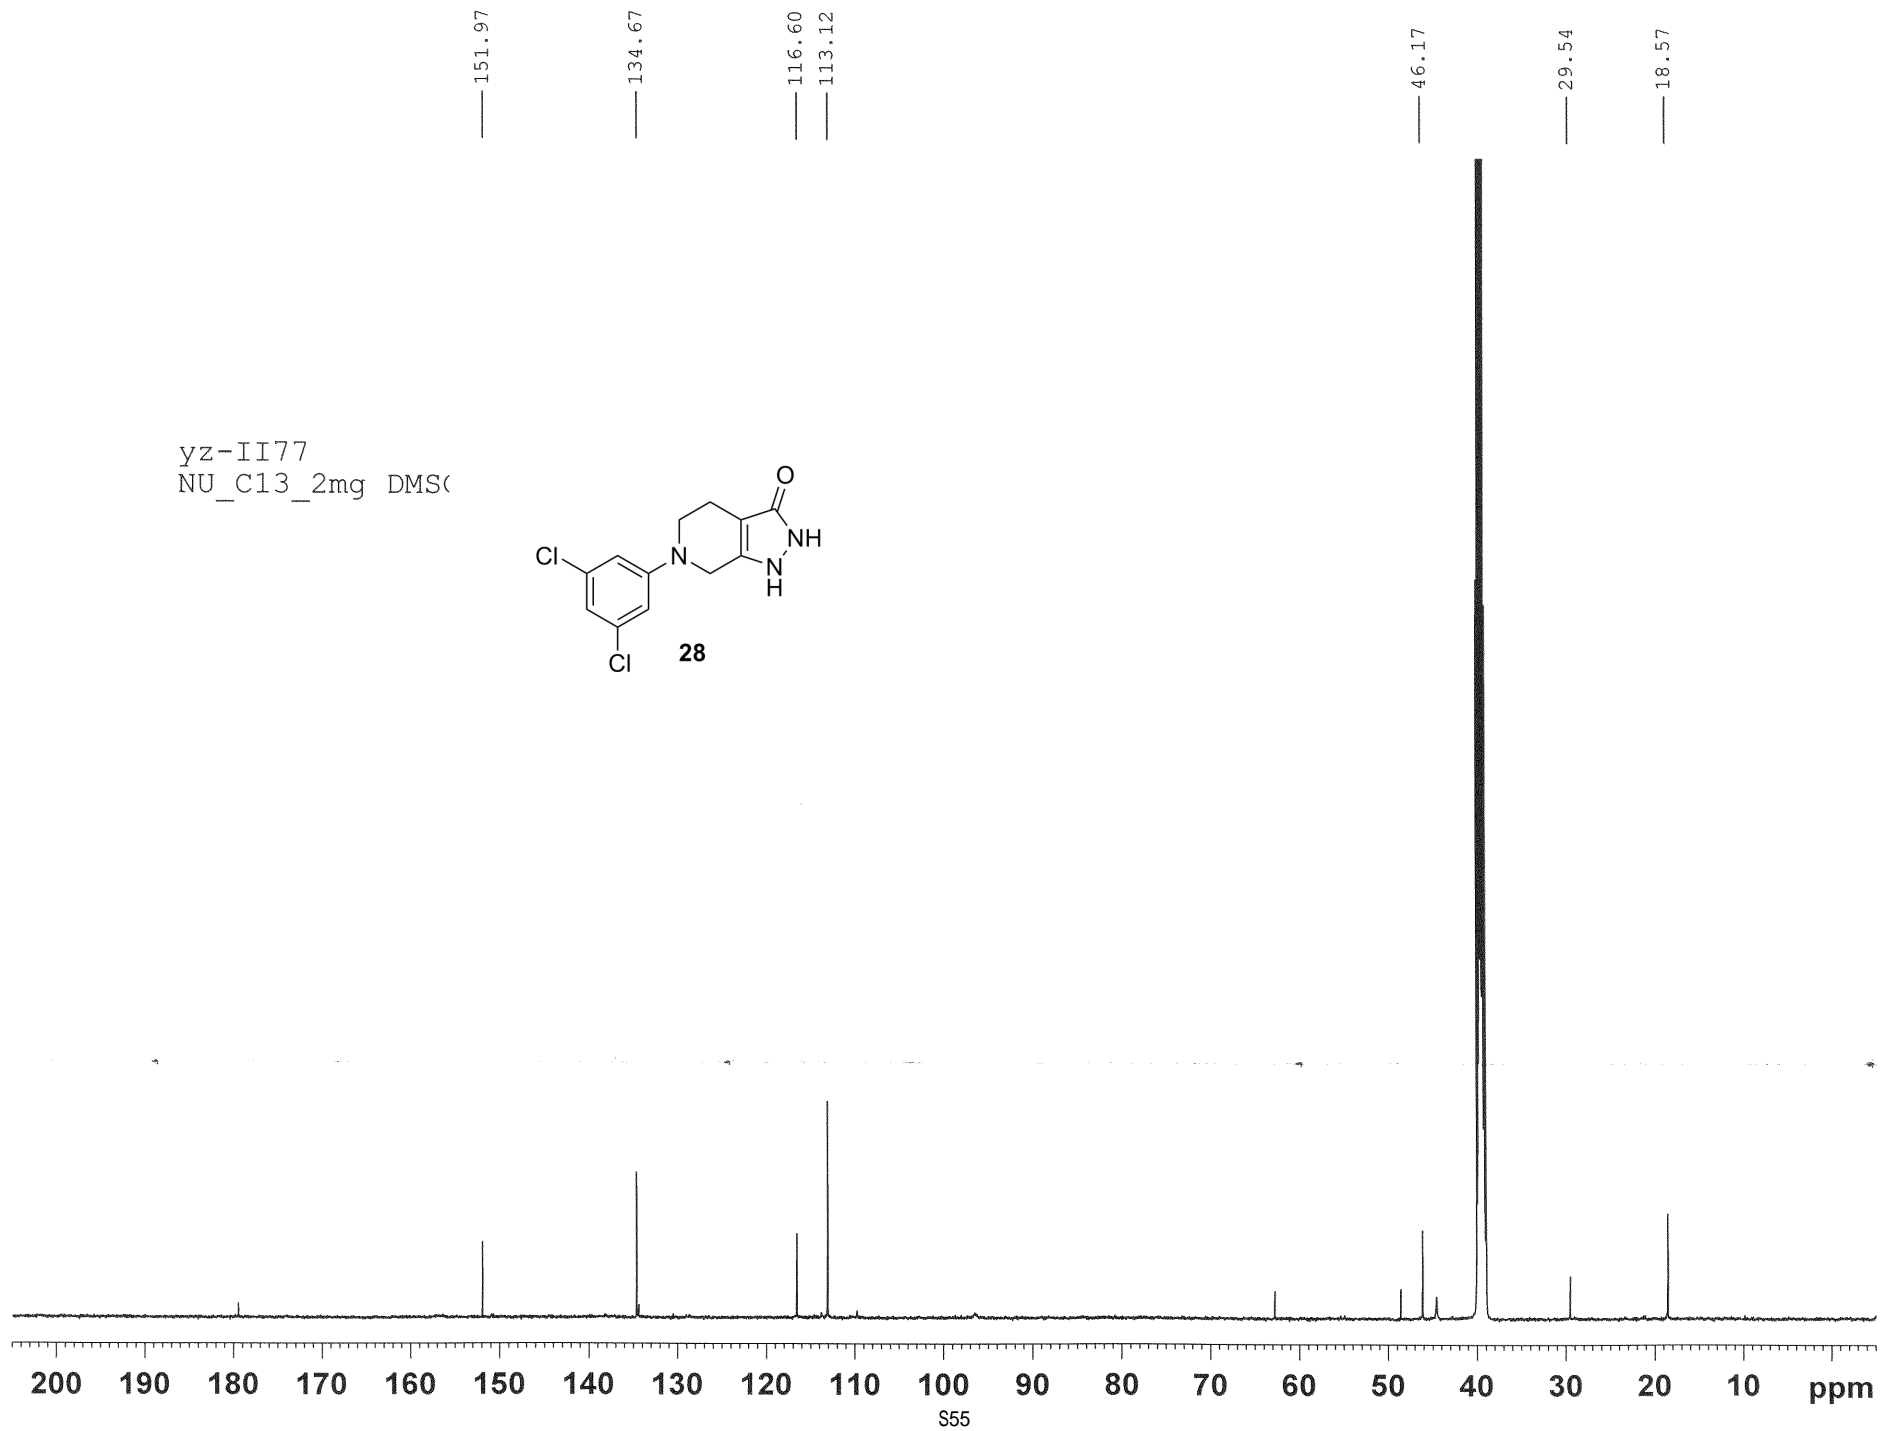

— 10.988

7.295  
7.281  
7.266  
7.243  
7.229  
7.115  
7.101  
6.742  
6.739  
6.689

— 5.185  
— 5.006

— 4.327

< 3.371  
< 3.369

— 2.978

< 2.503  
< 2.500  
< 2.496

yz-II82  
PROTON DMSO

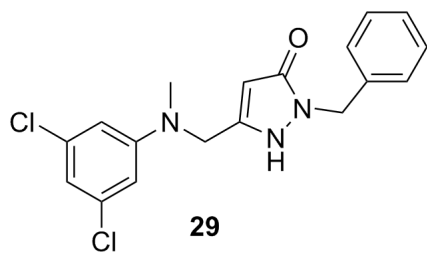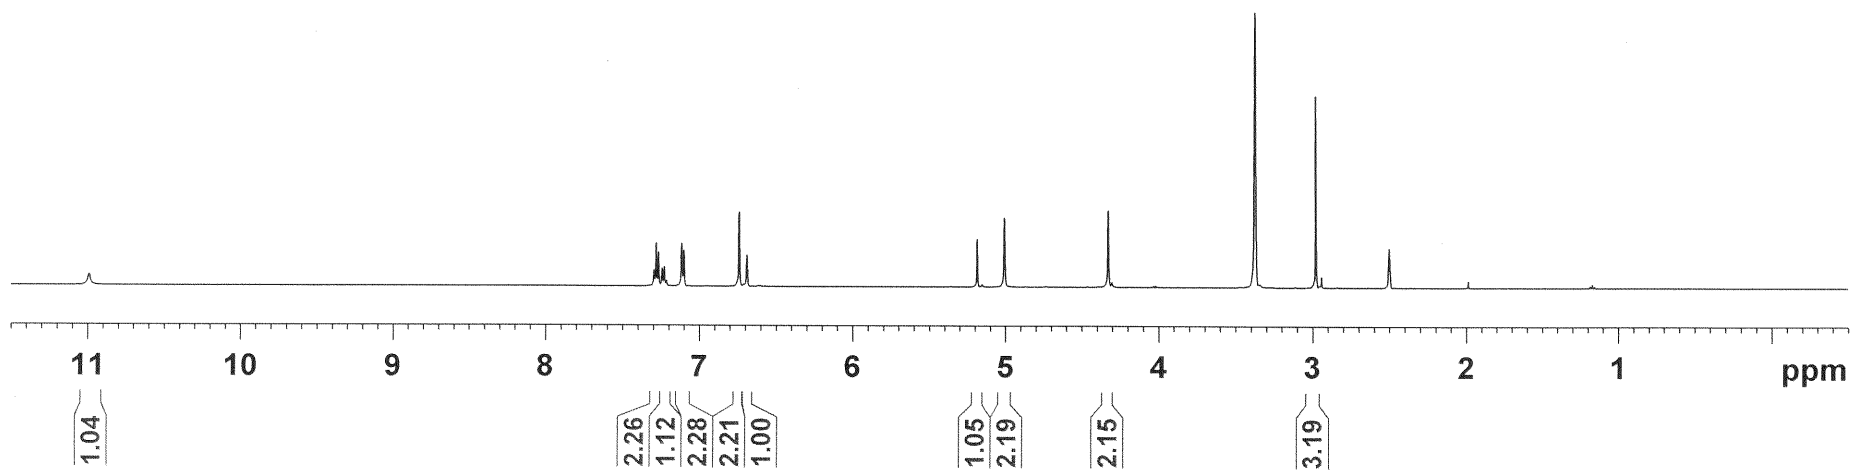



yz-II82  
NU\_C13\_2mg DMSO

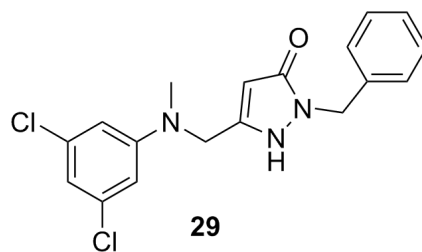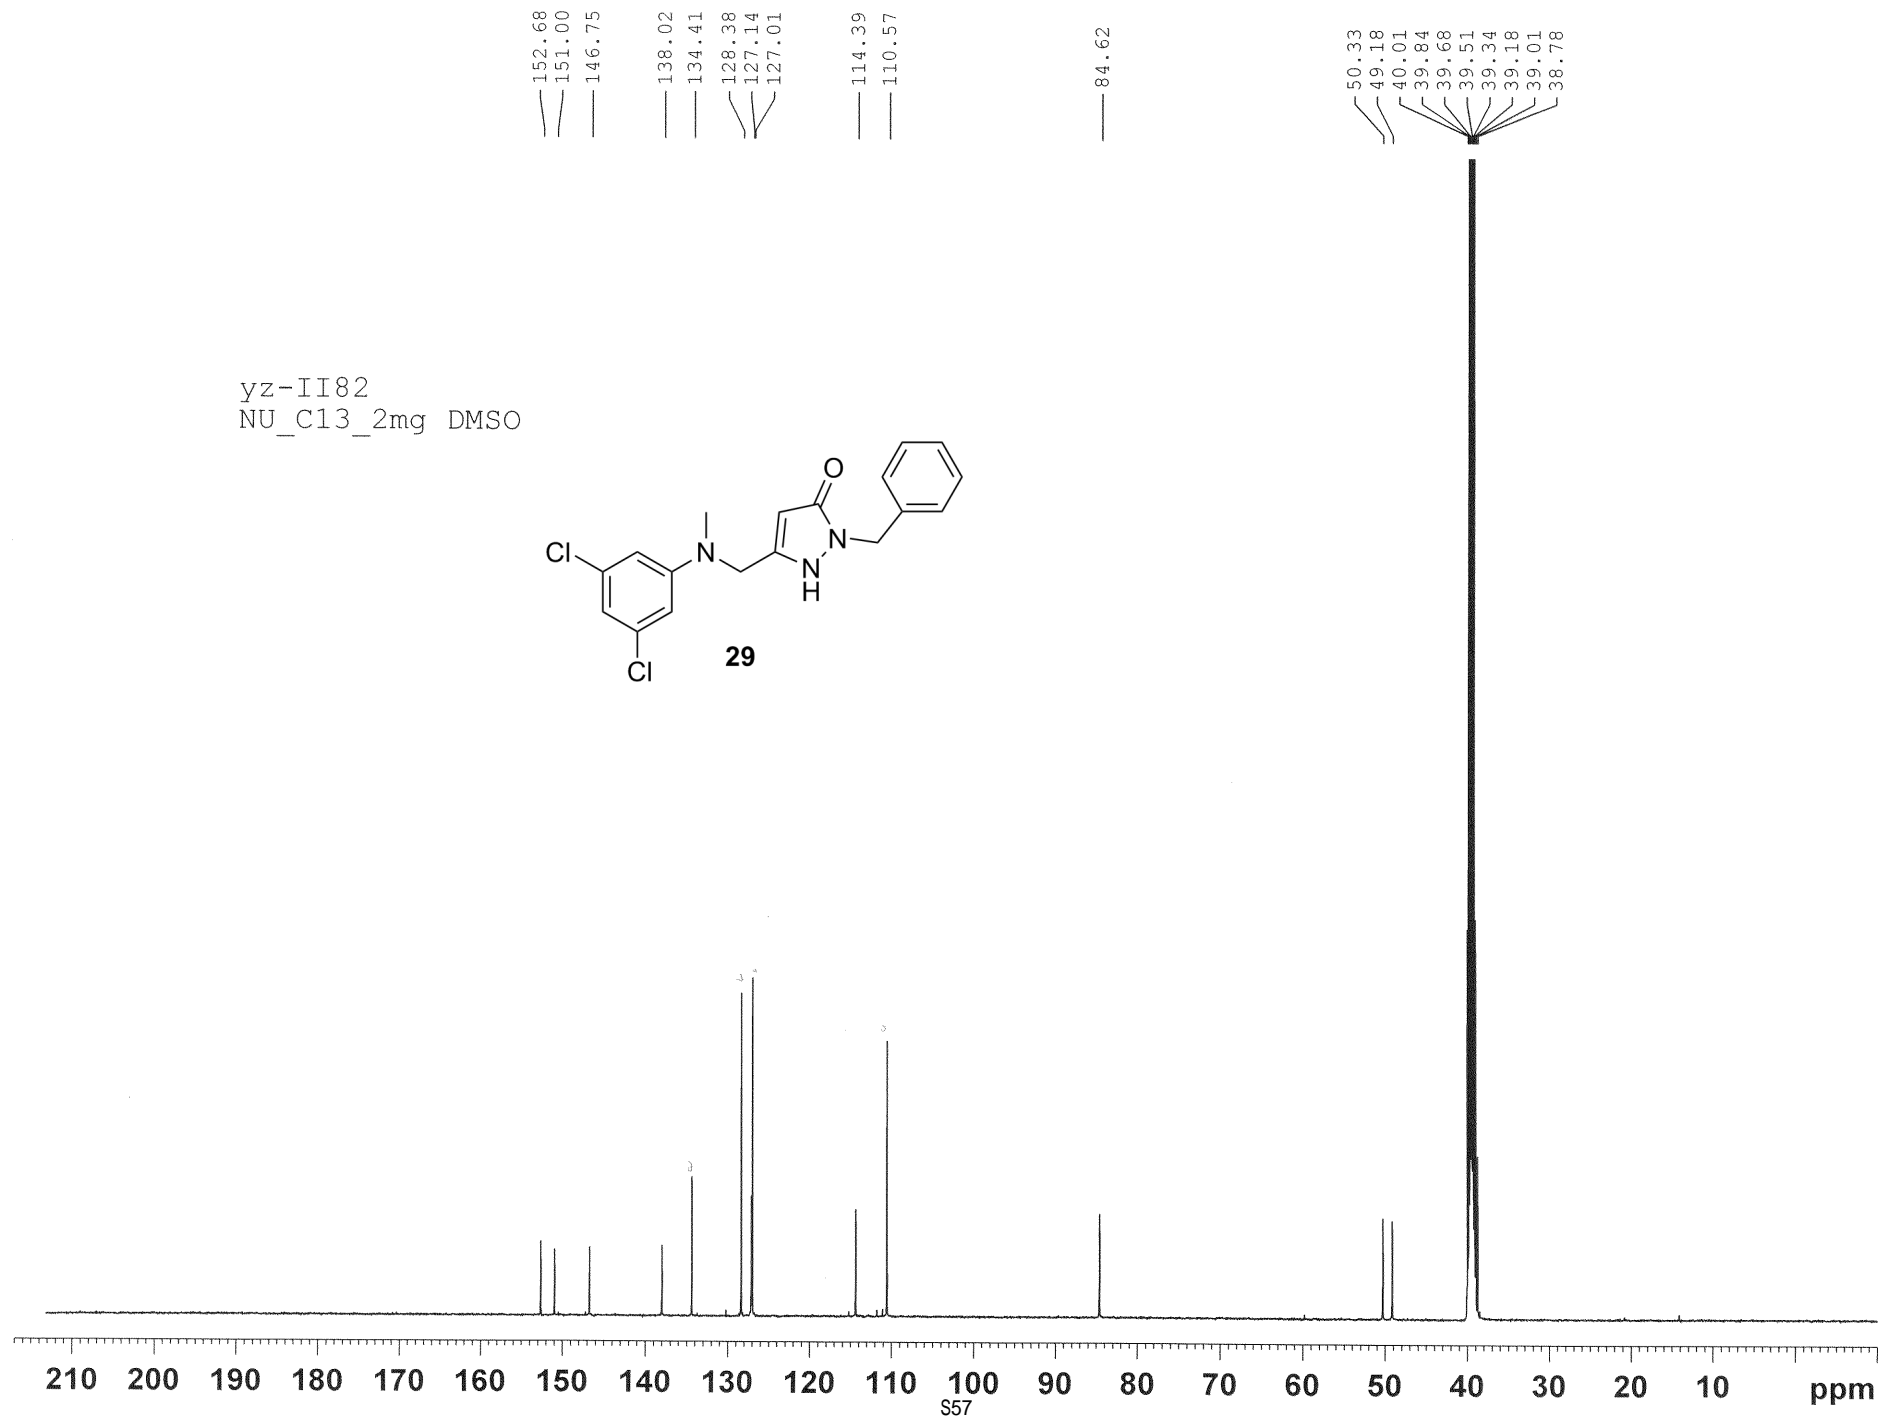

— 10.811

6.721  
6.678

— 5.135

— 4.286

3.436  
3.343

— 2.944

— 2.499

yz-II25  
PROTON DMSO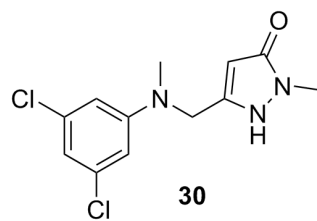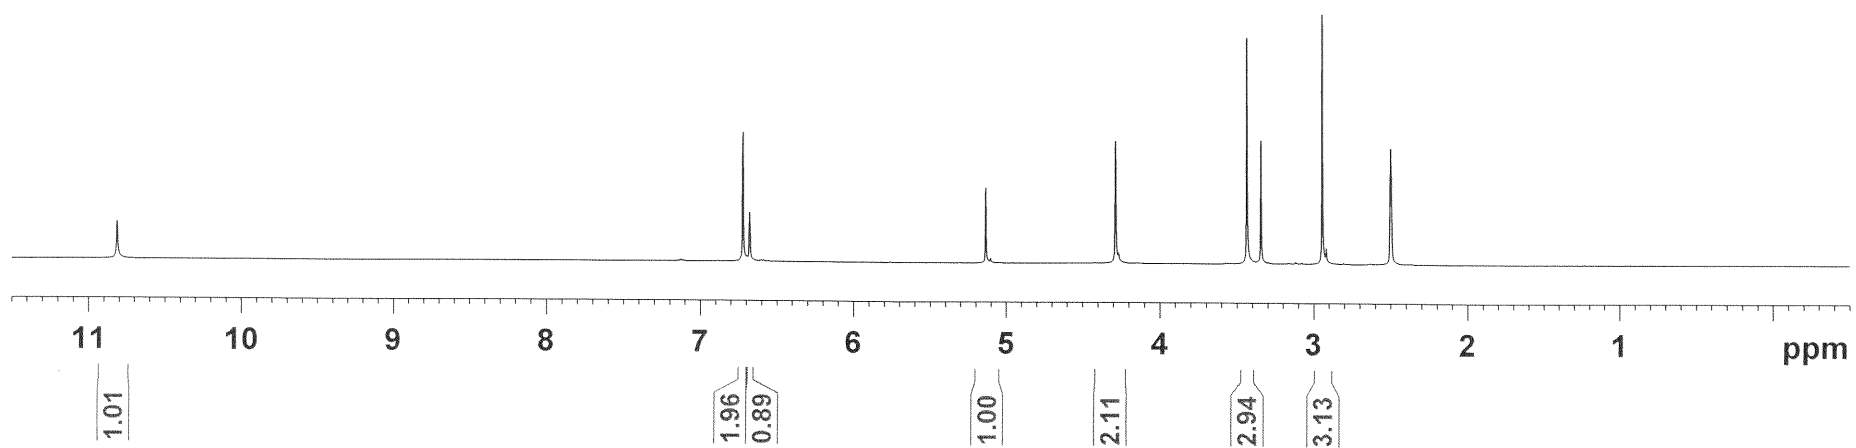

yz-II25  
NU\_C13\_2mg DMSO

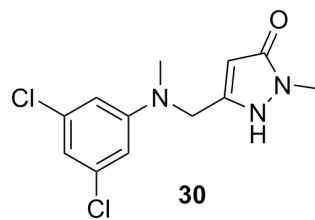

30

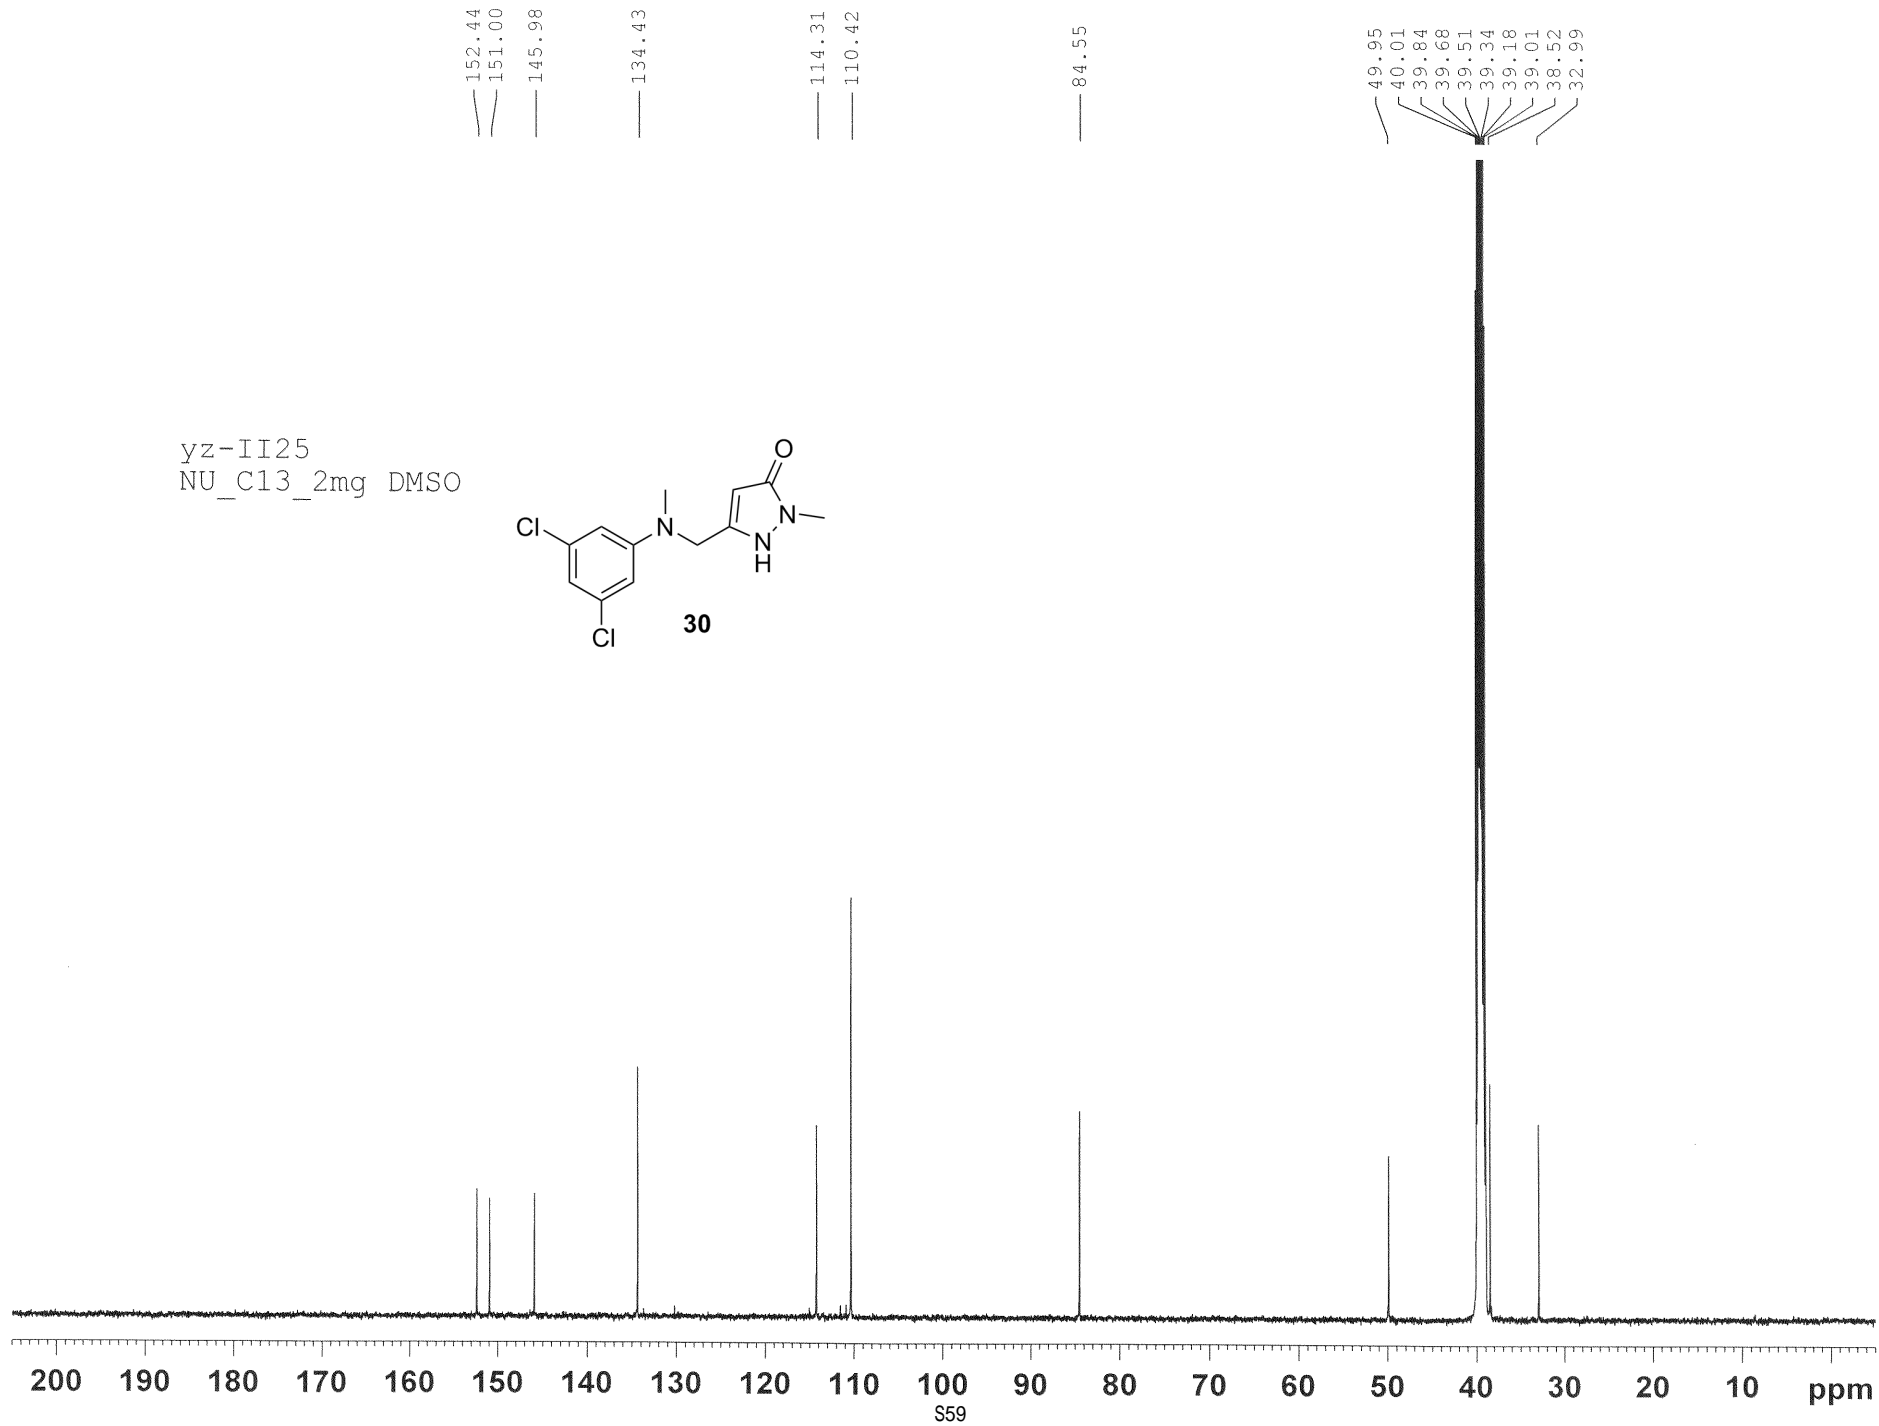

yz-II25  
NU\_HSQC DMSO {E:\A-500\Silverman} yzh966 53

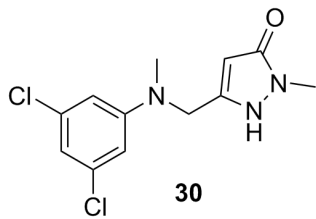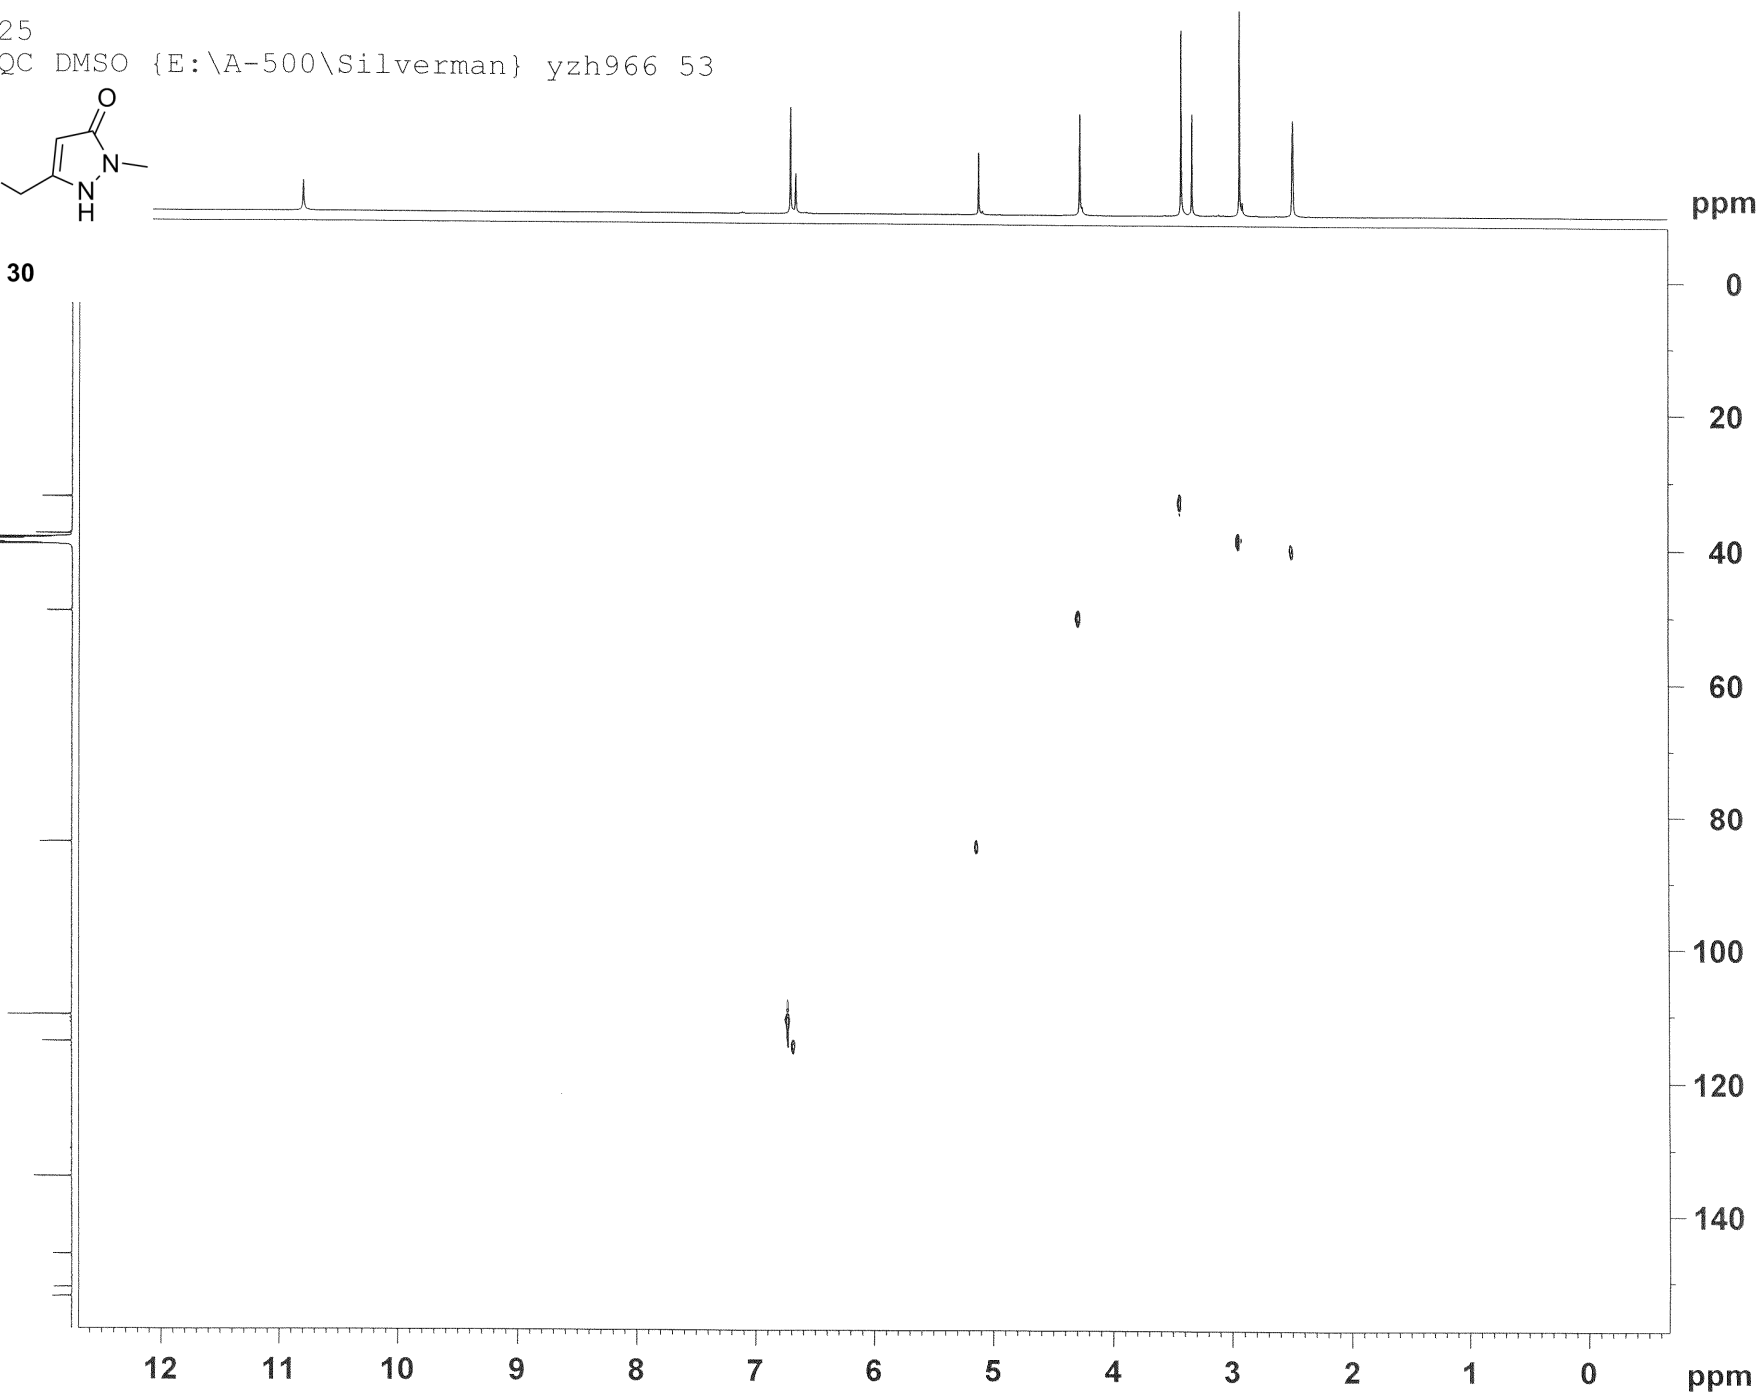

yz-II25  
 HMBCGPND DMSO {E:\A-500\Silverman} yzh966 53

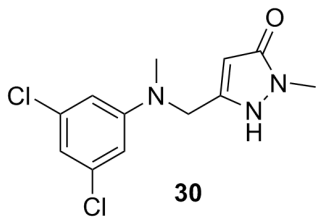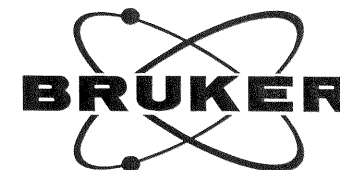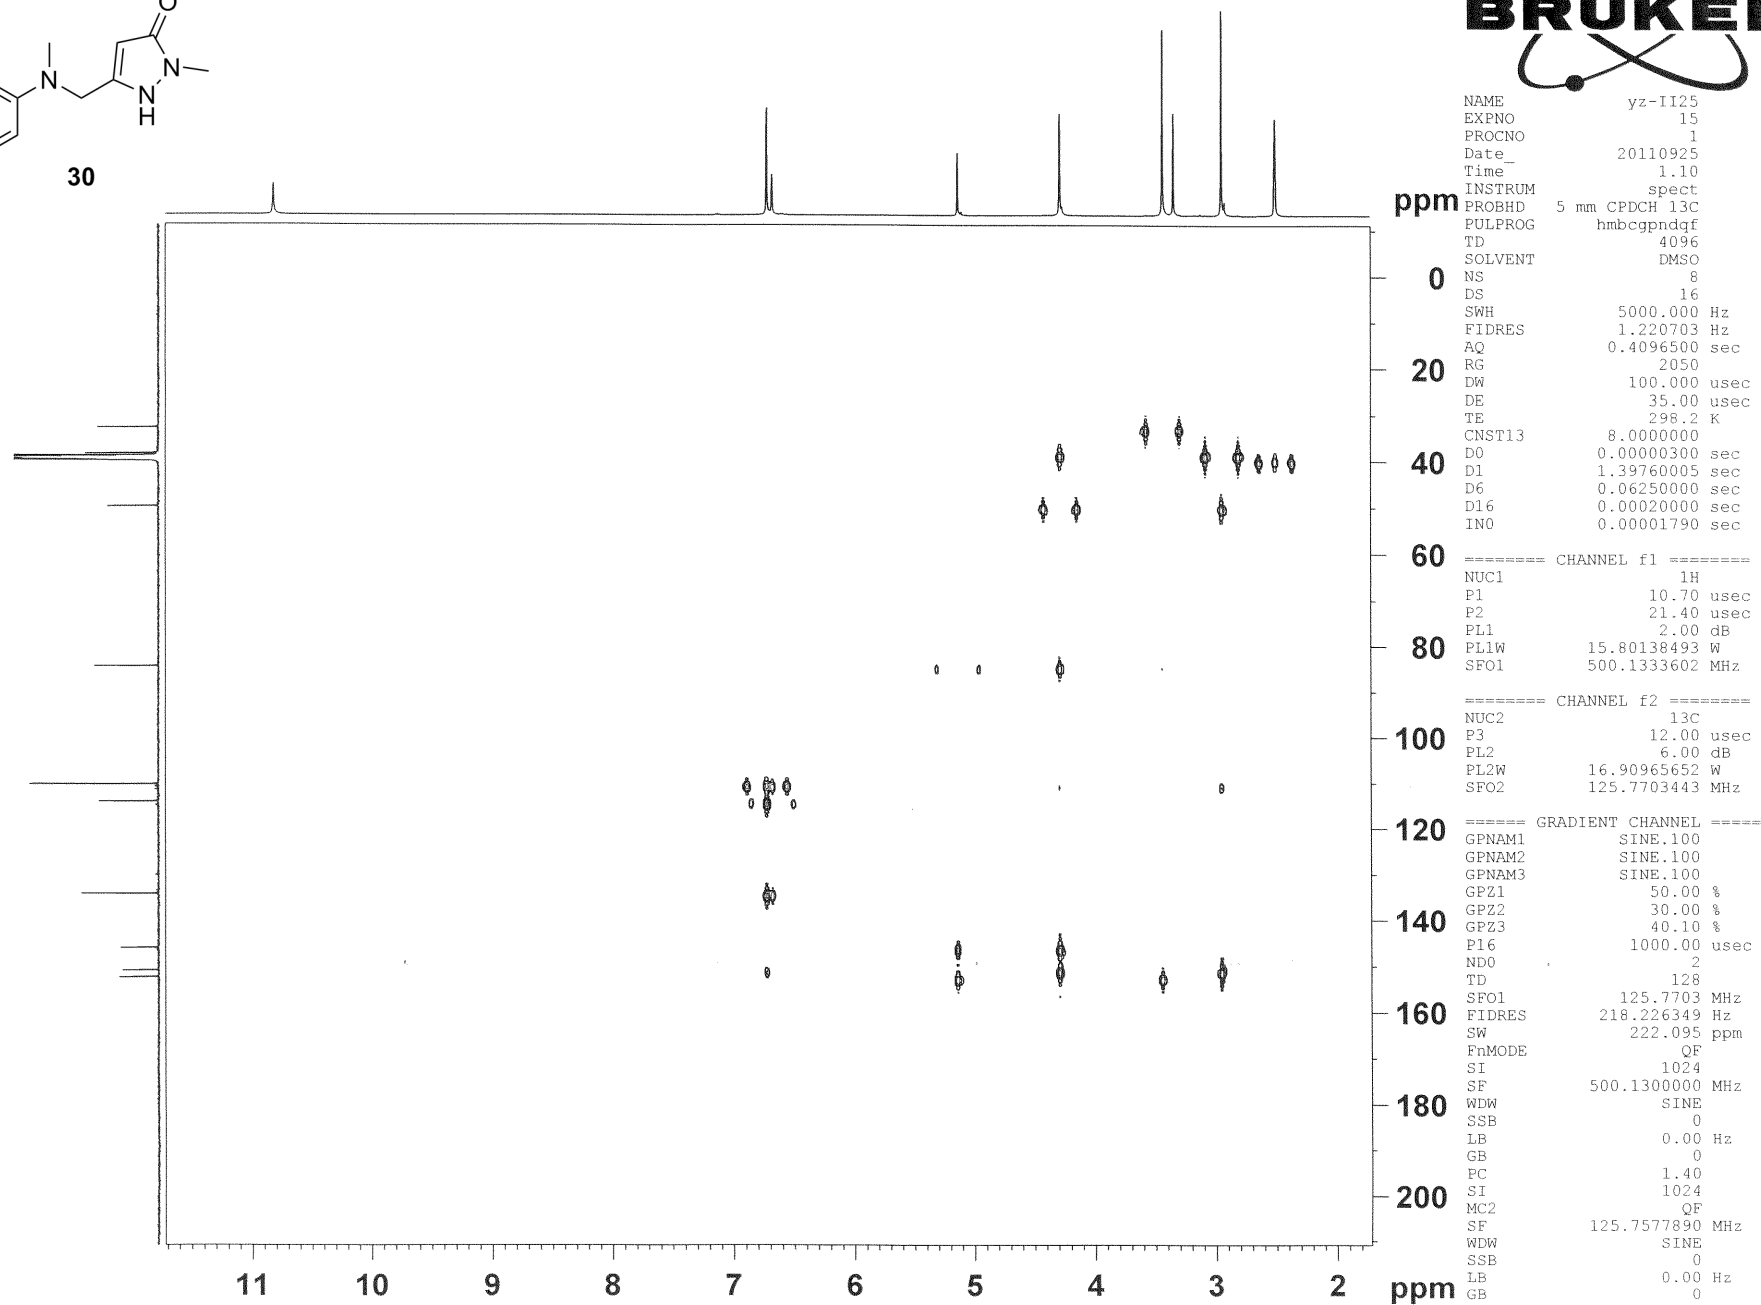

yz-II25

NOESYPSW DMSO {E:\A-500\Silverman} yzh966 53

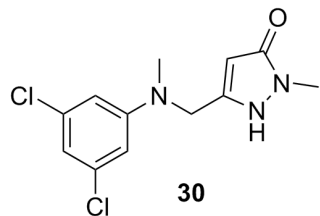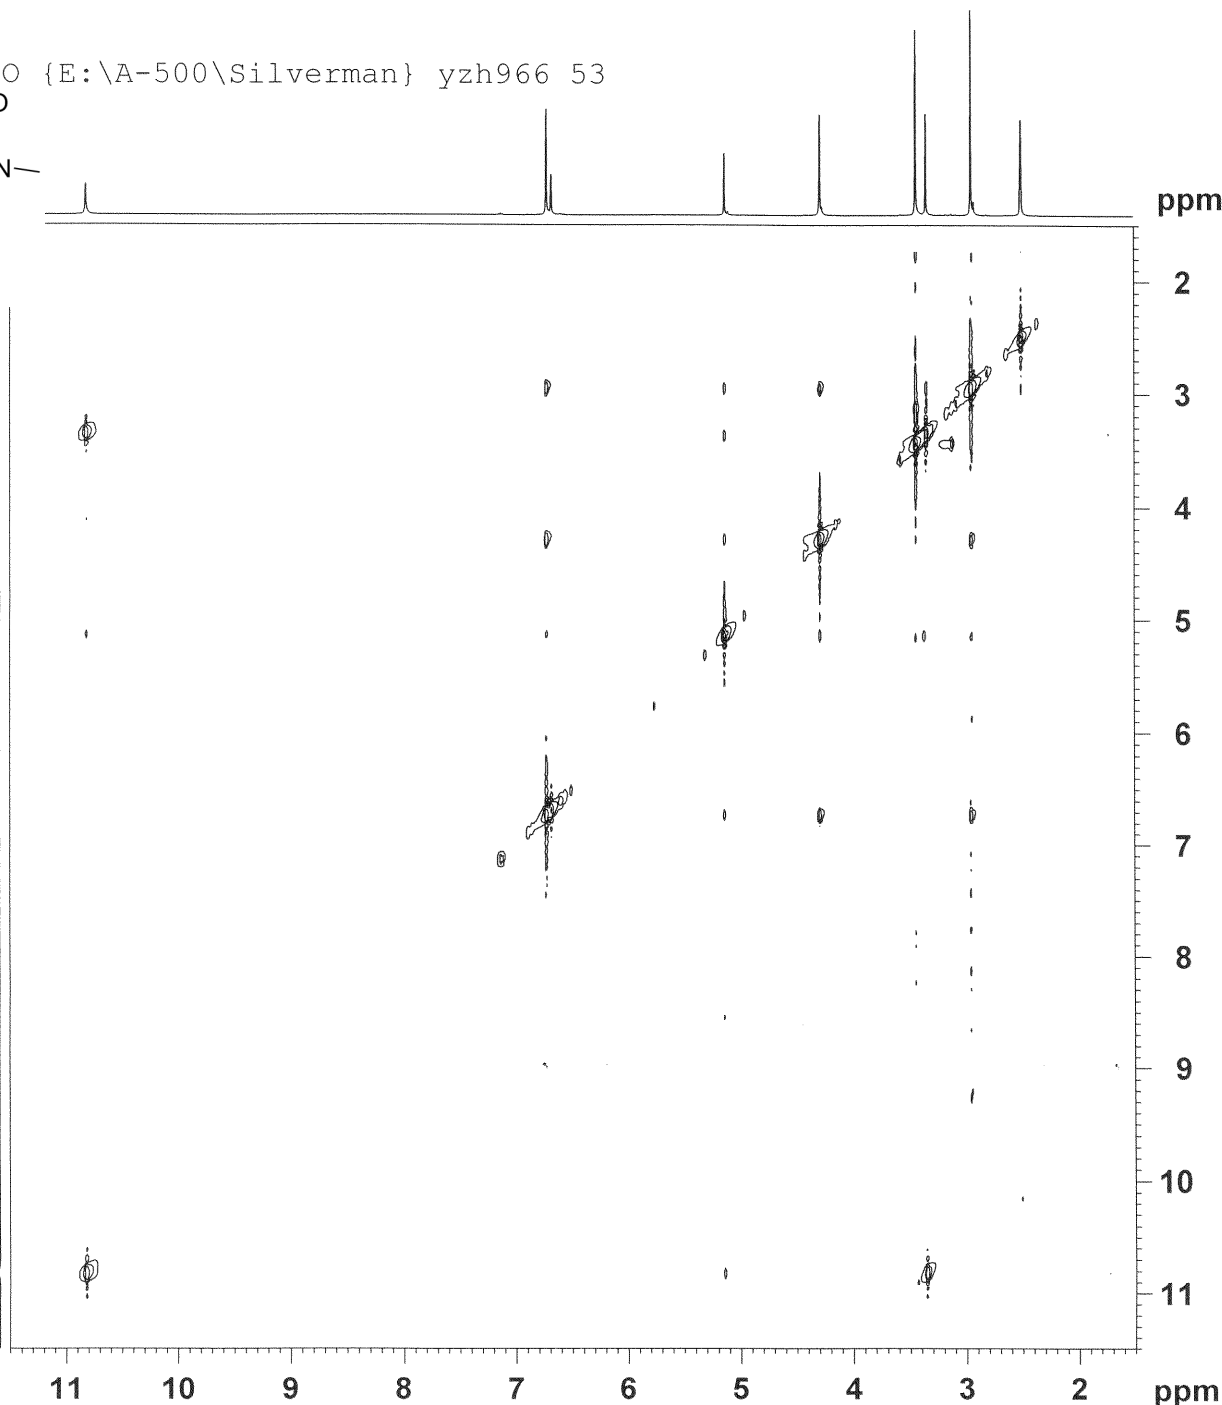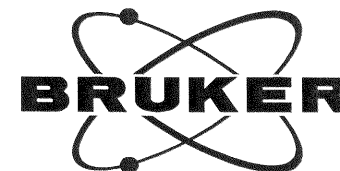

|         |                |
|---------|----------------|
| NAME    | yz-II25        |
| EXPNO   | 13             |
| PROCNO  | 1              |
| Date_   | 20110924       |
| Time    | 22.17          |
| INSTRUM | spect          |
| PROBHD  | 5 mm CPDCH 13C |
| PULPROG | noesyph        |
| TD      | 2048           |
| SOLVENT | DMSO           |
| NS      | 16             |
| DS      | 4              |
| SWH     | 5000.000 Hz    |
| FIDRES  | 2.441406 Hz    |
| AQ      | 0.2048500 sec  |
| RG      | 181            |
| DW      | 100.000 usec   |
| DE      | 35.00 usec     |
| TE      | 298.2 K        |
| DO      | 0.00008638 sec |
| D1      | 1.99590397 sec |
| D8      | 0.30000001 sec |
| INO     | 0.00020000 sec |

===== CHANNEL f1 =====

|        |                 |
|--------|-----------------|
| NUC1   | 1H              |
| P1     | 10.70 usec      |
| PL1    | 2.00 dB         |
| PL1W   | 15.80138493 W   |
| SFO1   | 500.1333602 MHz |
| ND0    | 1               |
| TD     | 256             |
| SFO1   | 500.1334 MHz    |
| FIDRES | 19.531250 Hz    |
| SW     | 9.997 ppm       |
| FnMODE | States-TPPI     |
| SI     | 1024            |
| SF     | 500.1300000 MHz |
| WDW    | QSINE           |
| SSB    | 2               |
| LB     | 0.00 Hz         |
| GB     | 0               |

|     |                 |
|-----|-----------------|
| PC  | 1.00            |
| SI  | 1024            |
| MC2 | States-TPPI     |
| SF  | 500.1300000 MHz |
| WDW | QSINE           |
| SSB | 2               |
| LB  | 0.00 Hz         |
| GB  | 0               |

yz-II25  
 NOESYPHSW DMSO {E:\A-500\Silverman} yzh966 53

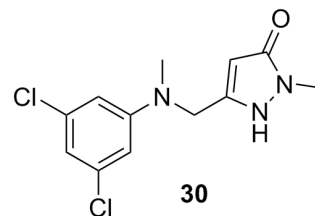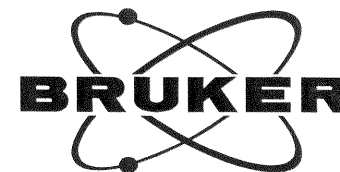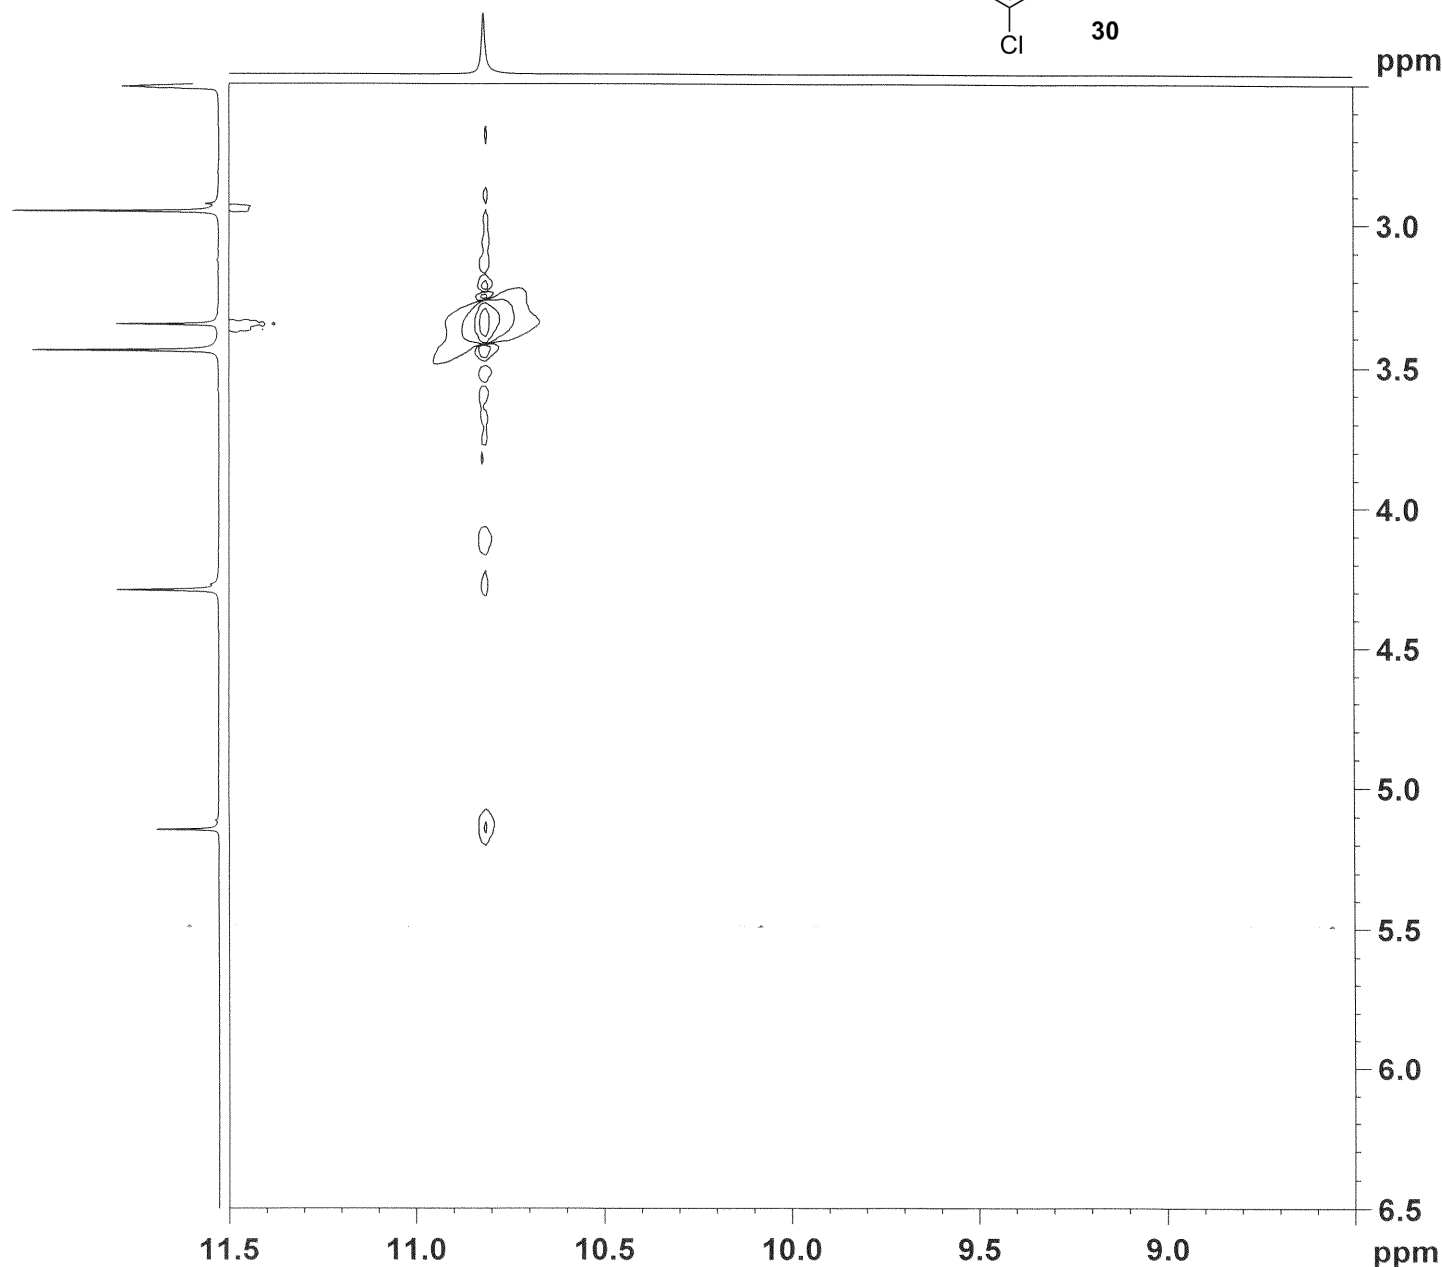

NAME yz-II25  
 EXPNO 13  
 PROCNO 1  
 Date\_ 20110924  
 Time\_ 22.17  
 INSTRUM spect  
 PROBHD 5 mm CPDCH 13C  
 PULPROG noesyph  
 TD 2048  
 SOLVENT DMSO  
 NS 16  
 DS 4  
 SWH 5000.000 Hz  
 FIDRES 2.441406 Hz  
 AQ 0.2048500 sec  
 RG 181  
 DW 100.000 usec  
 DE 35.00 usec  
 TE 298.2 K  
 D0 0.00008638 sec  
 D1 1.99590397 sec  
 D8 0.30000001 sec  
 IN0 0.00020000 sec

===== CHANNEL f1 =====

NUC1 1H  
 P1 10.70 usec  
 PL1 2.00 dB  
 PL1W 15.80138493 W  
 SFO1 500.1333602 MHz  
 ND0 1  
 TD 256  
 SFO1 500.1334 MHz  
 FIDRES 19.531250 Hz  
 SW 9.997 ppm  
 FrMODE States-TPPI  
 SI 1024  
 SF 500.1300000 MHz  
 WDW QSINE  
 SSB 2  
 LB 0.00 Hz  
 GB 0  
 PC 1.00  
 SI 1024  
 MC2 States-TPPI  
 SF 500.1300000 MHz  
 WDW QSINE  
 SSB 2  
 LB 0.00 Hz  
 GB 0

7.260  
6.658  
6.655  
6.636  
6.632  
5.185  
5.019  
5.003  
5.001  
4.987  
4.355  
4.268  
4.251  
4.236  
2.992  
1.611

yz-II81  
PROTON CDC13

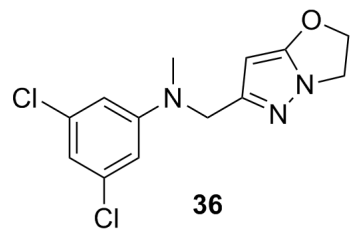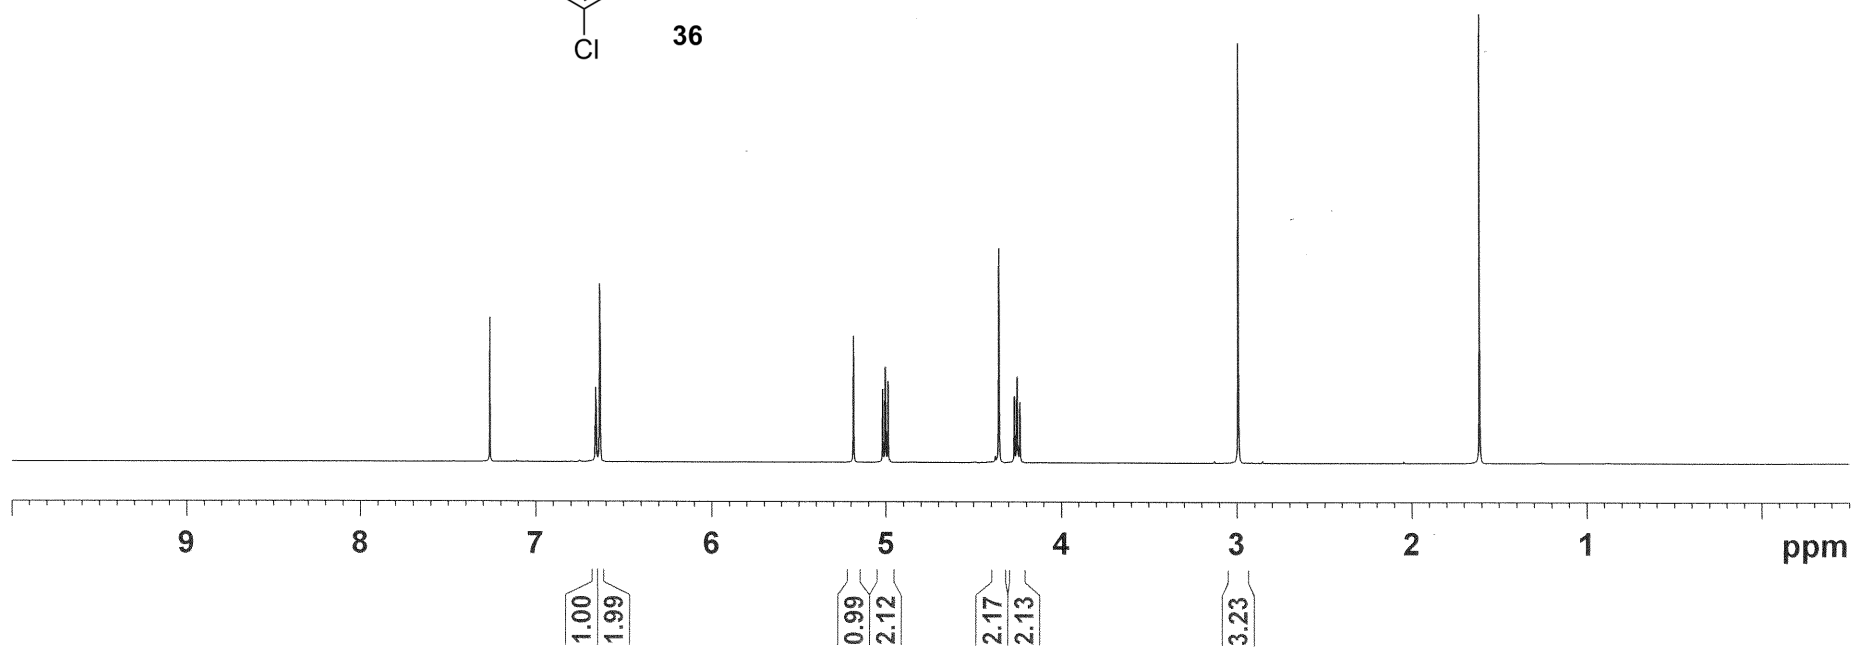



yz-II81  
NU\_C13\_5mg CDCl<sub>3</sub>

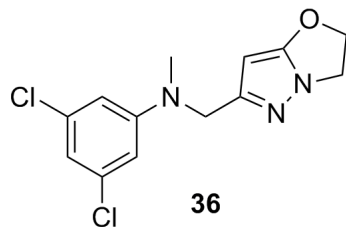

36

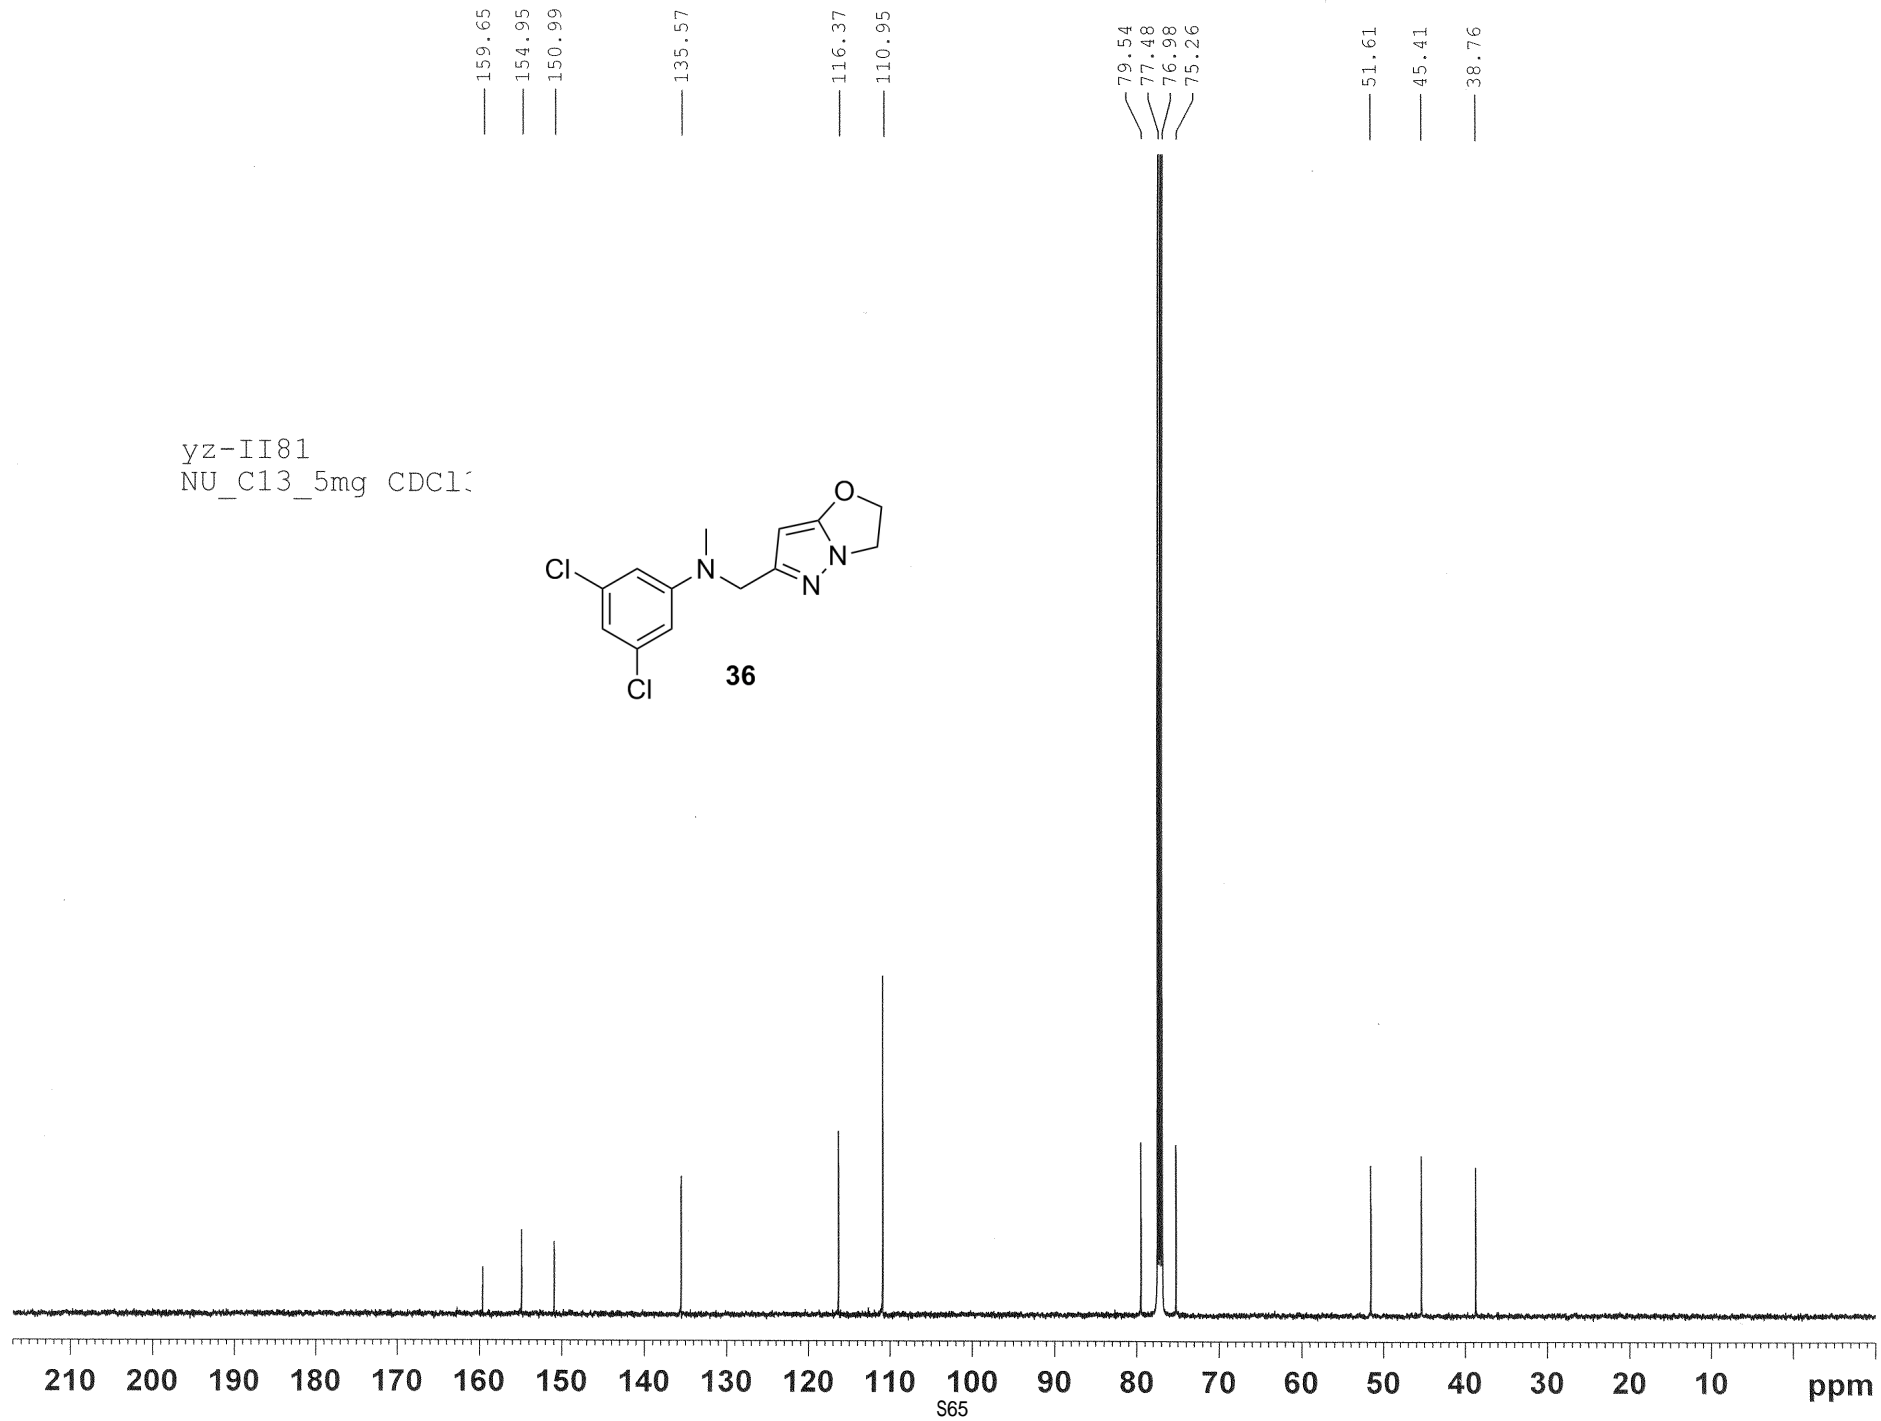

yz-II91  
PROTON CDC13

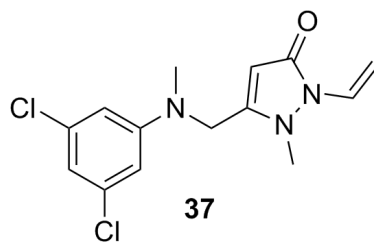

7.260  
6.876  
6.858  
6.844  
6.826  
6.772  
6.769  
6.766  
6.565  
6.561  
5.366  
5.298  
4.886  
4.885  
4.854  
4.853  
4.822  
4.821  
4.803  
4.314  
4.308  
3.167  
3.003  
2.994  
1.637

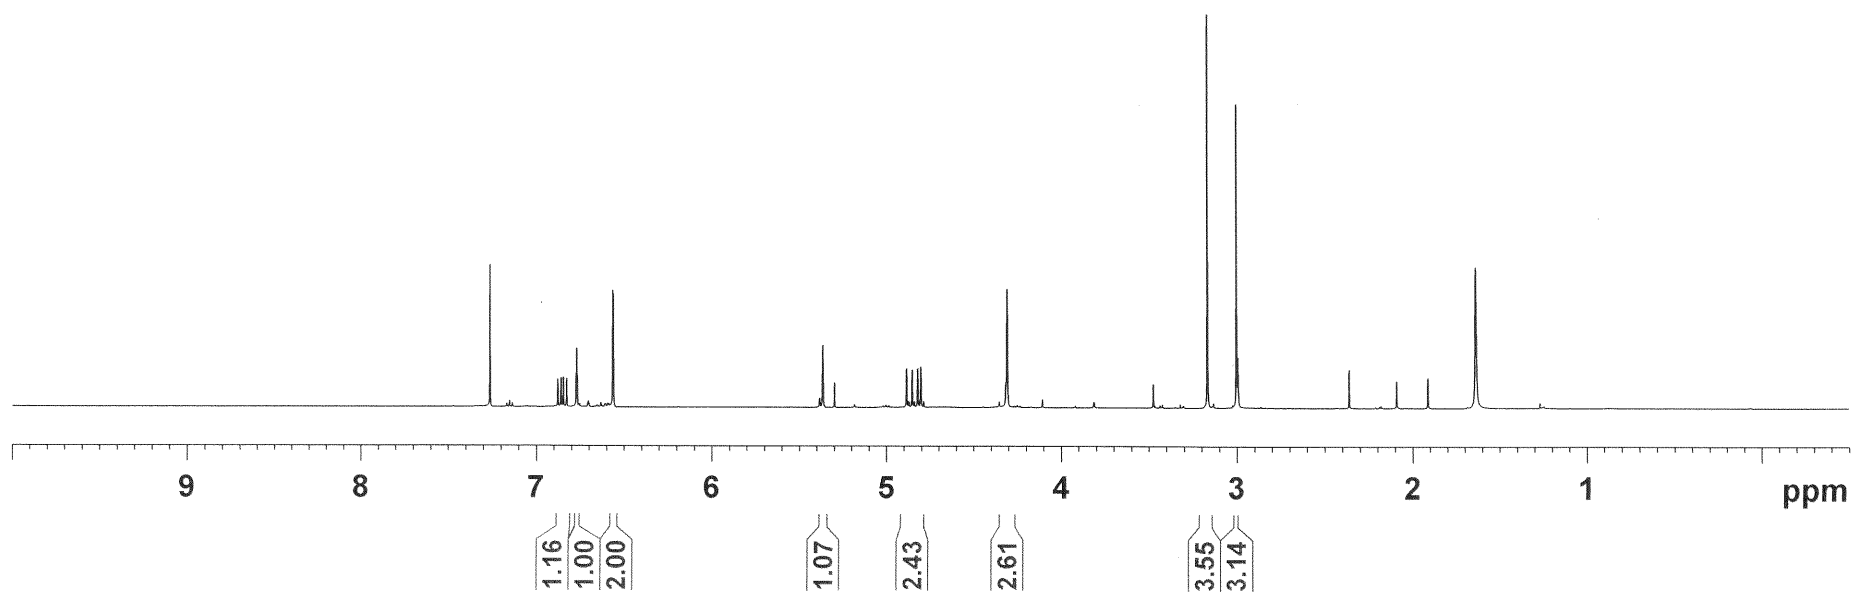

yz-II91  
NU\_C13\_5mg CDCl<sub>3</sub>

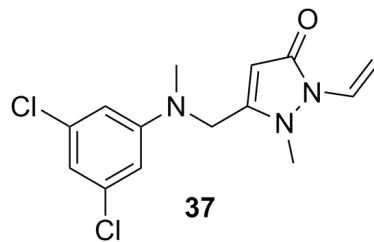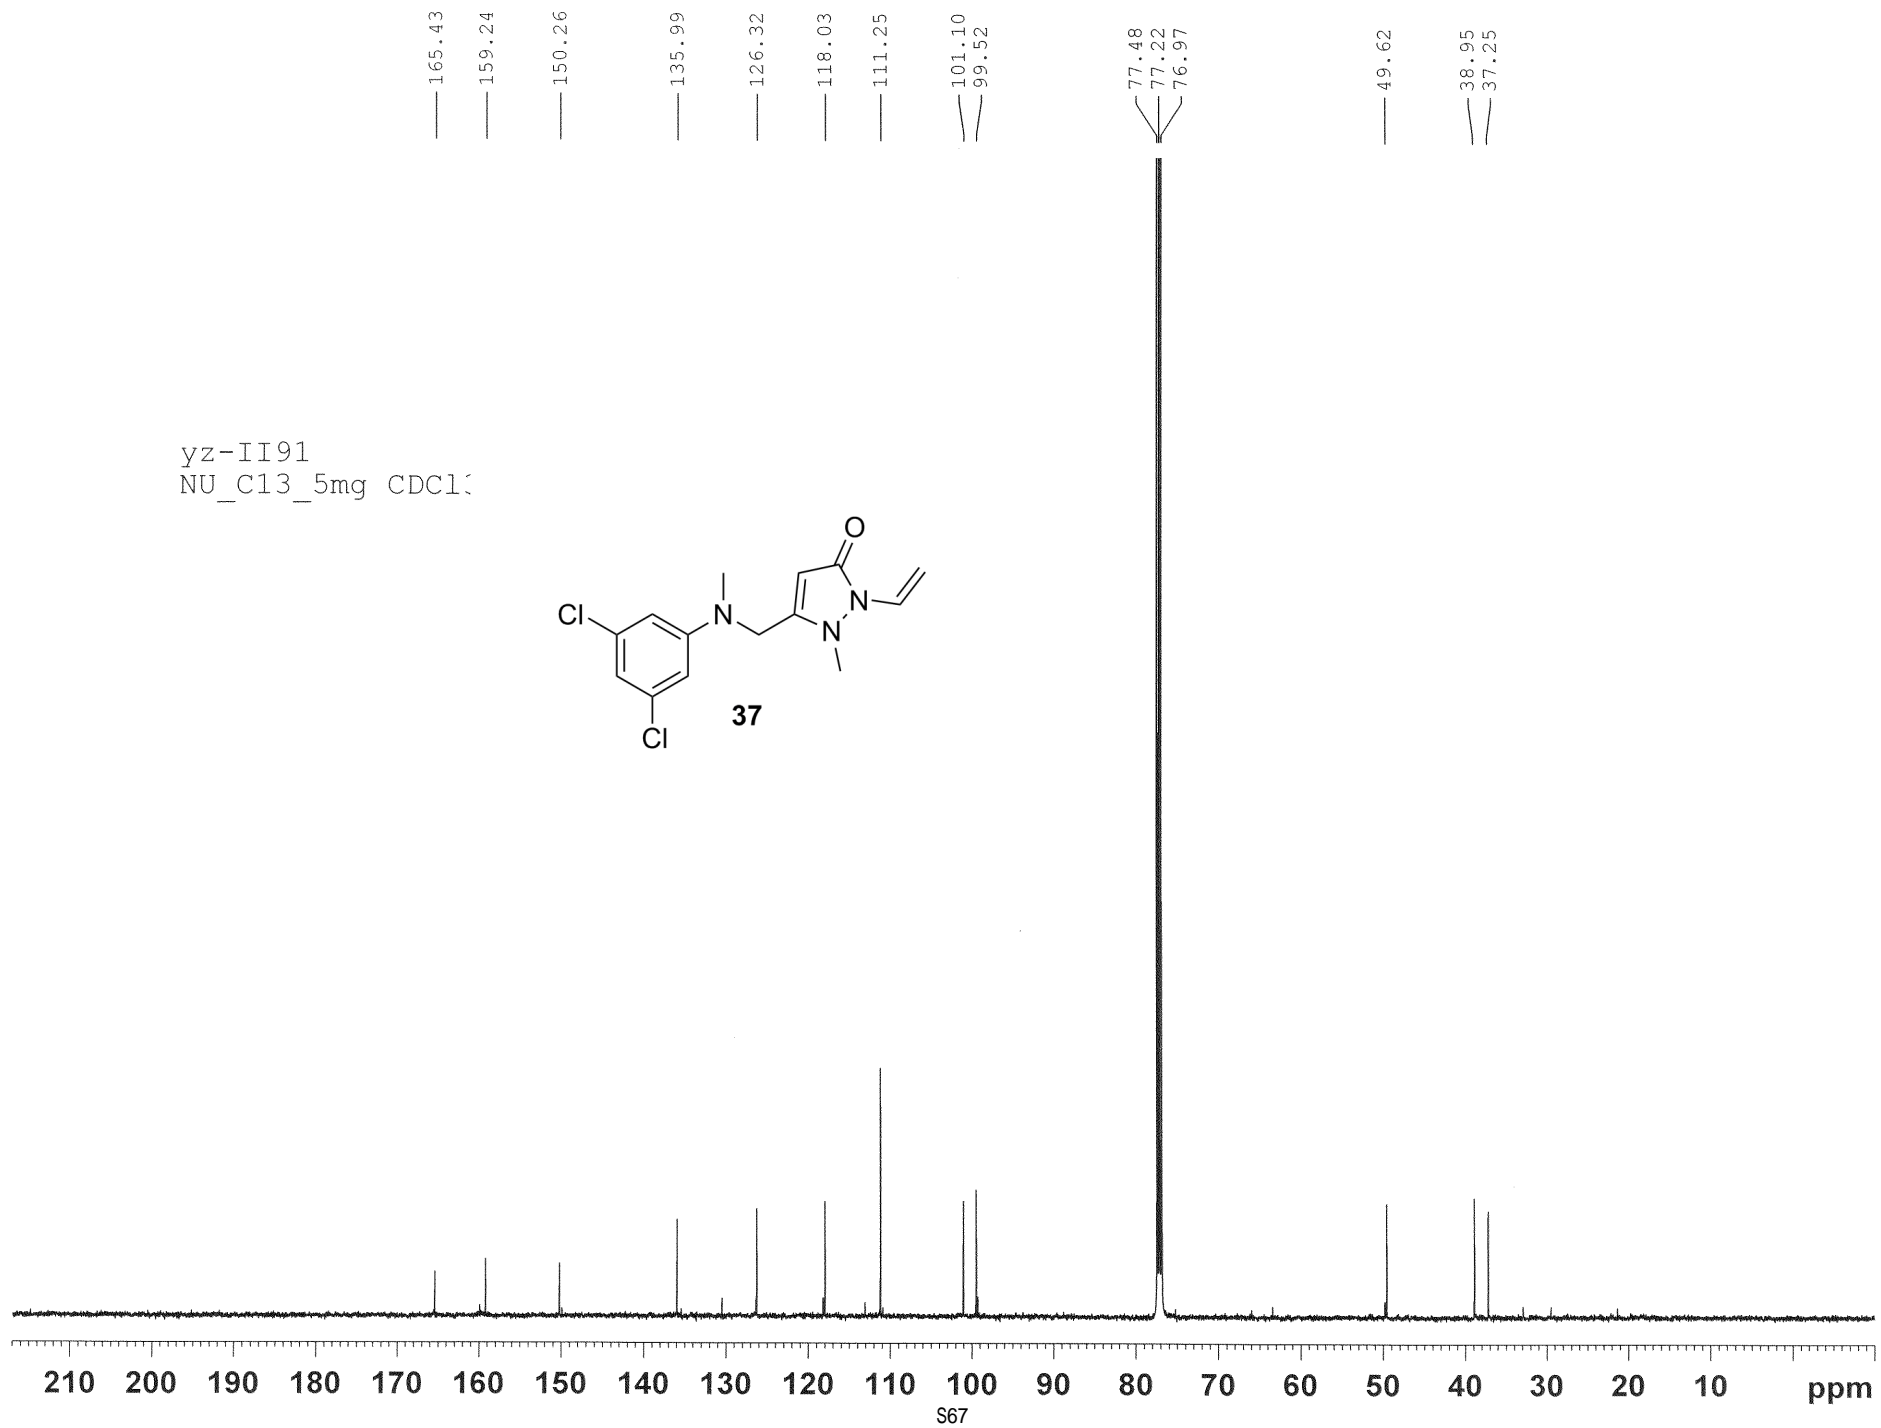

yz-II94  
PROTON DMSO

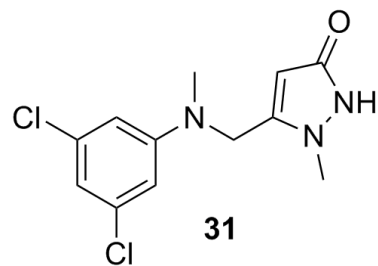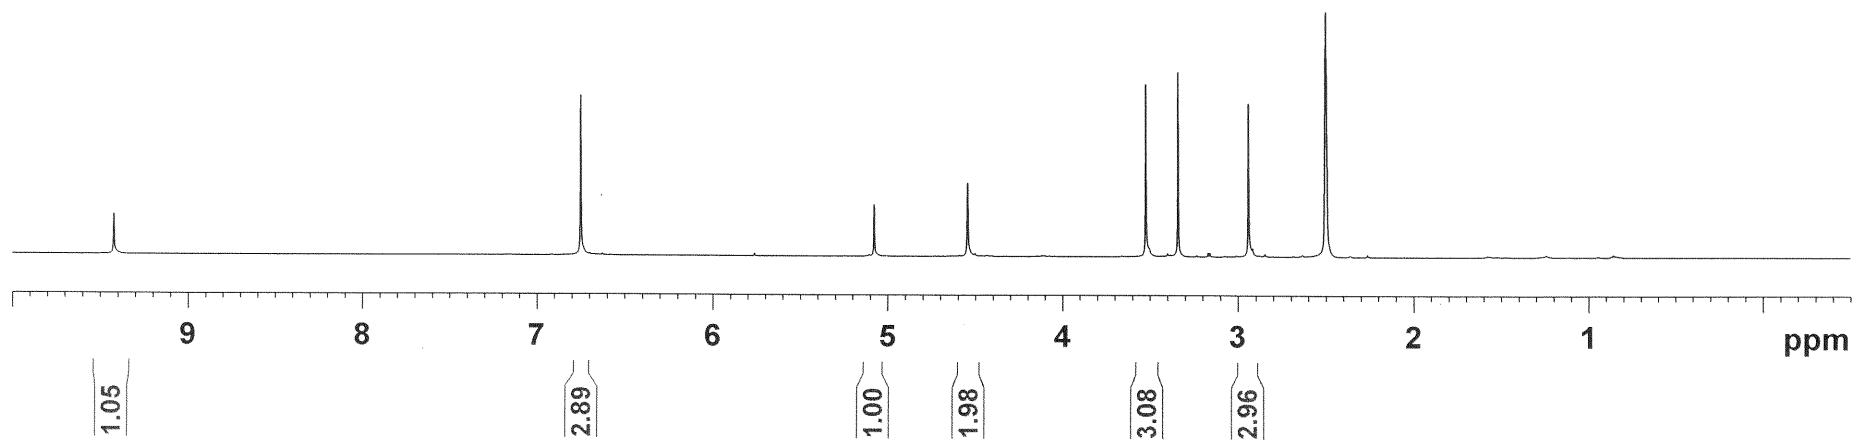

—9.421

—6.750

—5.077

—4.545

—3.523

—3.339

—2.940

—2.503

—2.500

yz-II94  
NU\_C13\_2mg DMSO

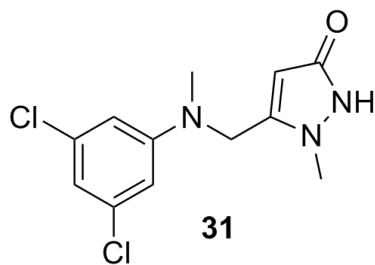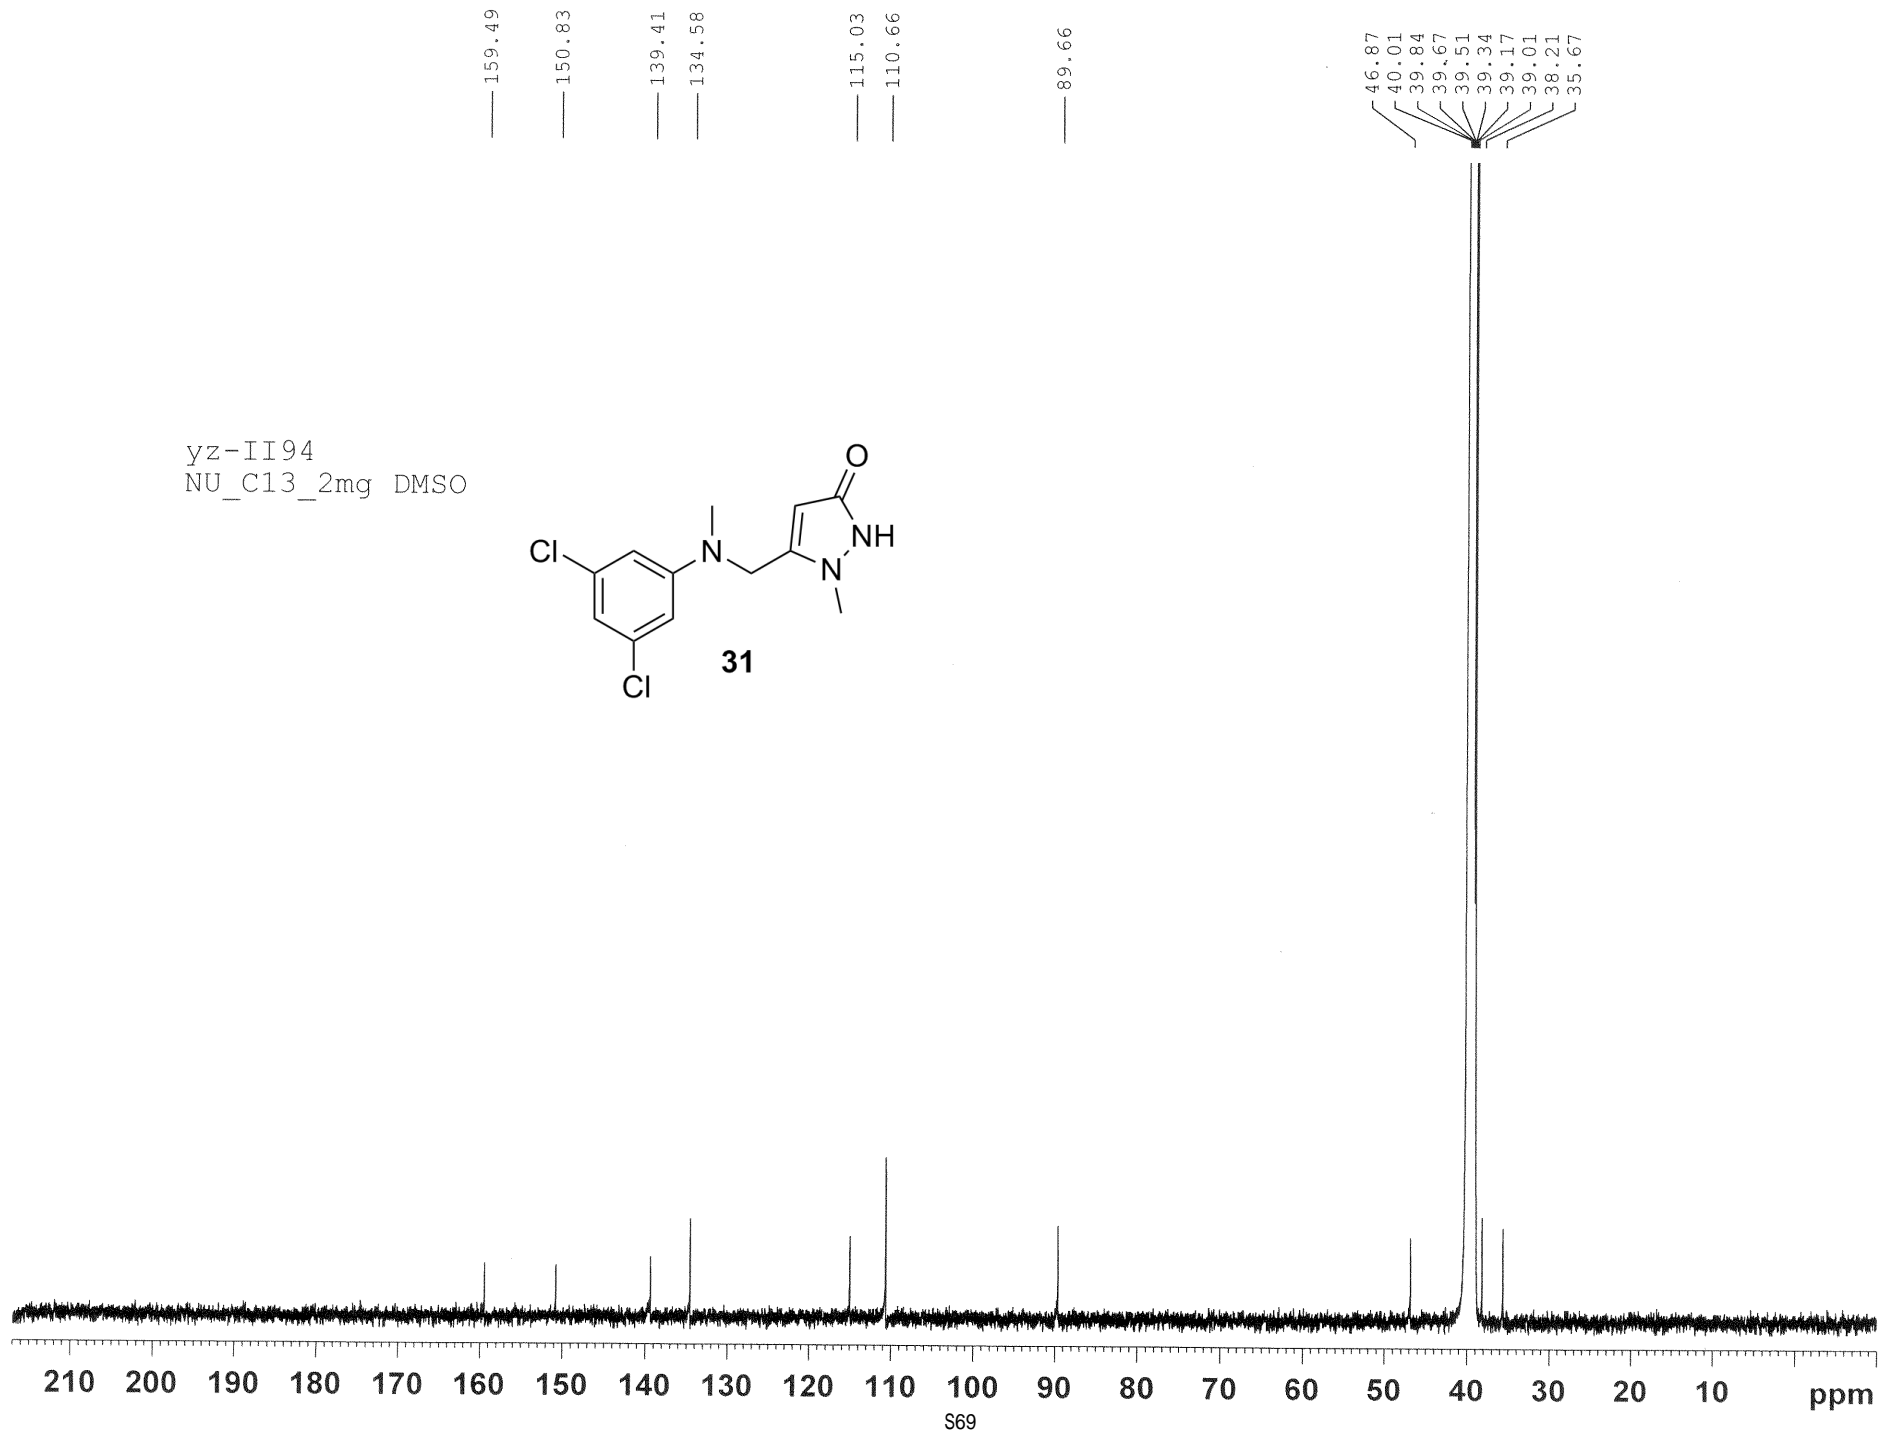

yz-II94  
NU\_HSQC DMSO {E:\A-500\Silverman} yzh966 56

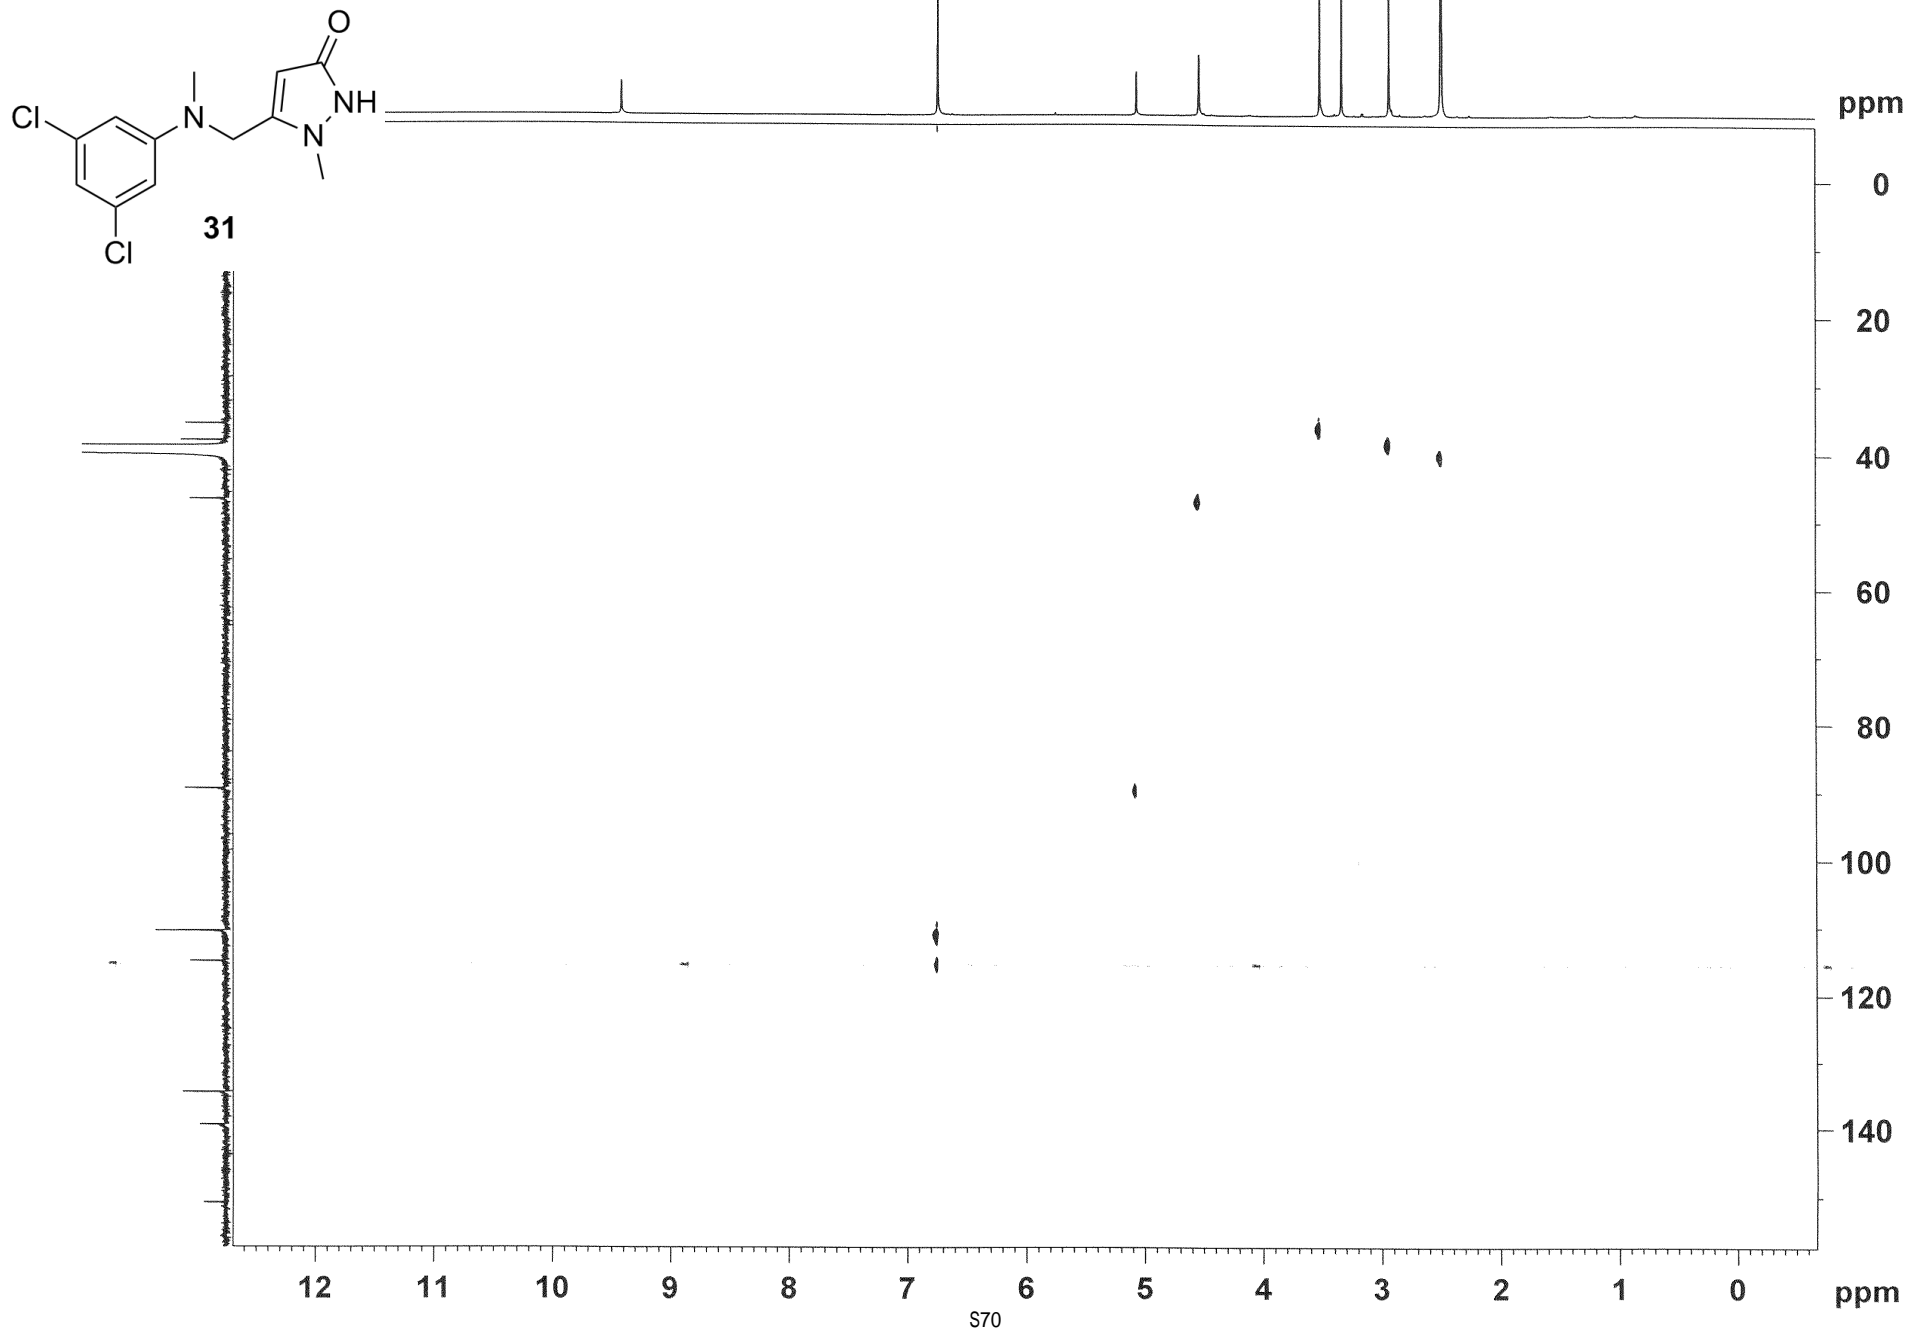

yz-II94

NU\_HMBC\_manualSW DMSO {E:\A-500\Silverman} yzh966 56

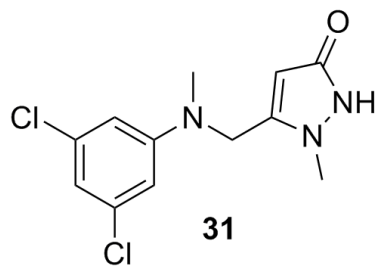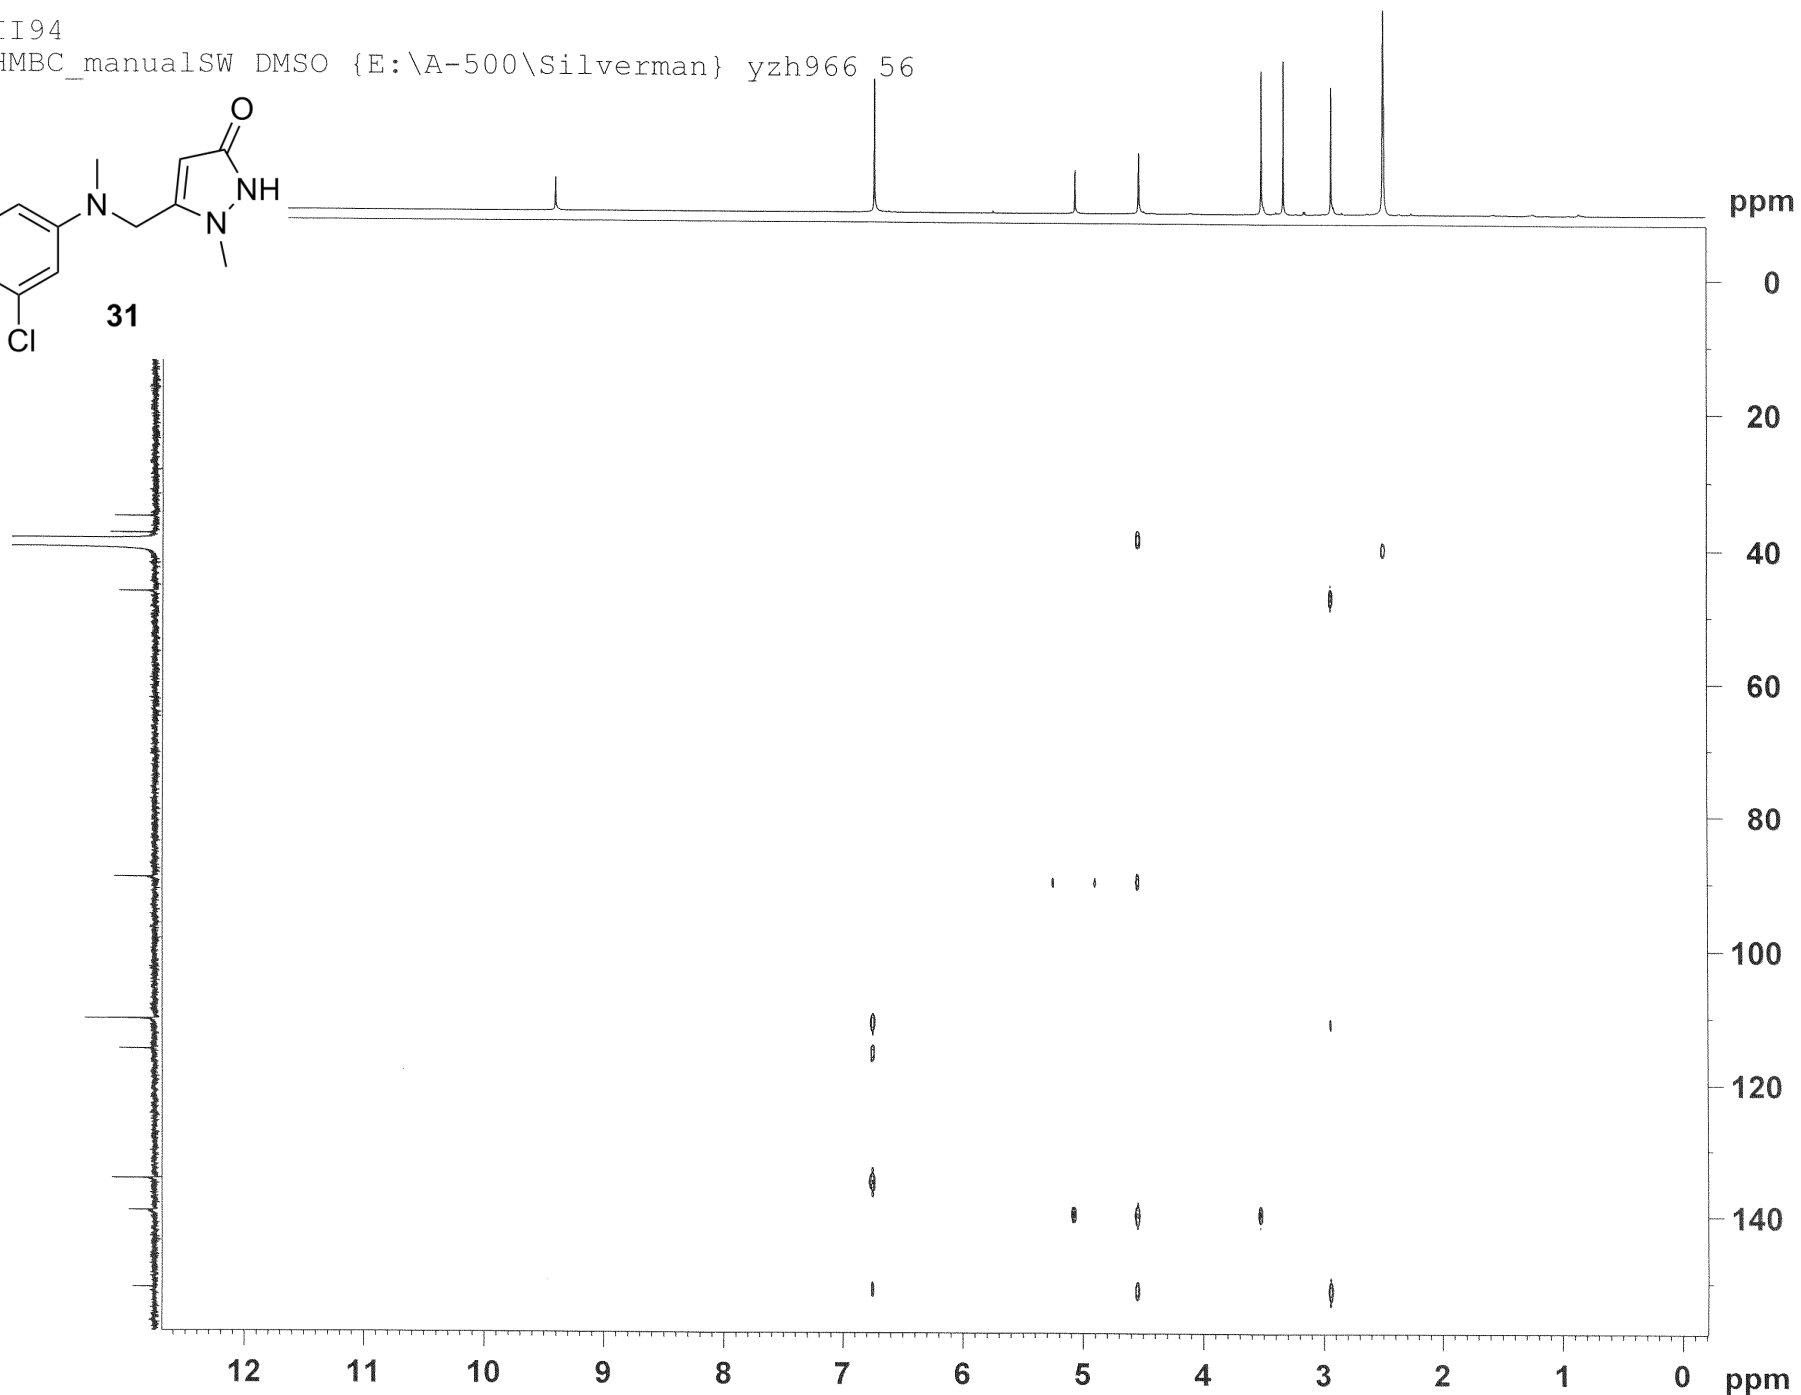

yz-II94  
 NU\_NOESY\_manualSW DMSO {E:\A-500\Silverman} yzh966 56

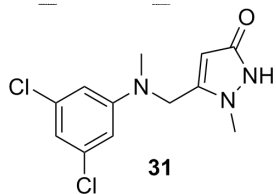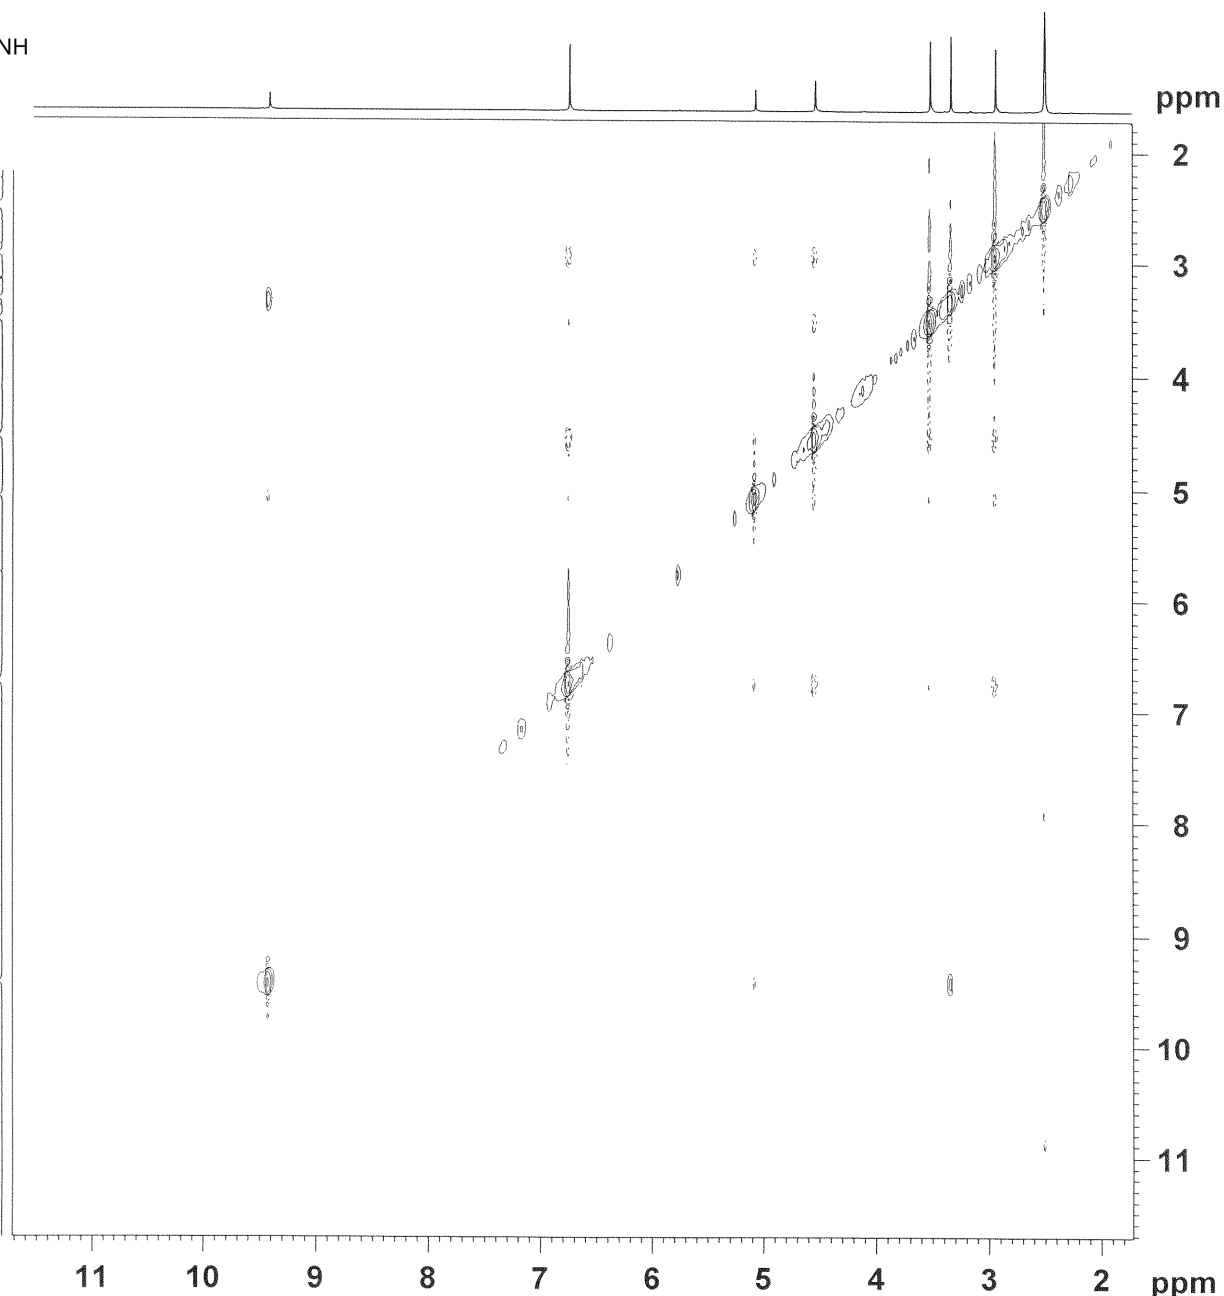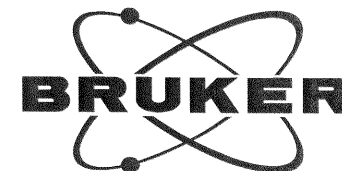

|                              |                 |
|------------------------------|-----------------|
| NAME                         | yz-II94         |
| EXPNO                        | 15              |
| PROCNO                       | 1               |
| Date_                        | 20111001        |
| Time                         | 22.35           |
| INSTRUM                      | spect           |
| PROBHD                       | 5 mm CPDCH 13C  |
| PULPROG                      | noesygp         |
| TD                           | 2048            |
| SOLVENT                      | DMSO            |
| NS                           | 16              |
| DS                           | 4               |
| SWH                          | 7500.000 Hz     |
| FIDRES                       | 3.662109 Hz     |
| AQ                           | 0.1365833 sec   |
| RG                           | 406             |
| DW                           | 66.667 usec     |
| DE                           | 35.00 usec      |
| TE                           | 298.2 K         |
| D0                           | 0.00005304 sec  |
| D1                           | 2.00000000 sec  |
| D8                           | 0.30000001 sec  |
| D16                          | 0.00020000 sec  |
| IN0                          | 0.00013335 sec  |
| ===== CHANNEL f1 =====       |                 |
| NUC1                         | 1H              |
| P1                           | 10.70 usec      |
| P2                           | 21.40 usec      |
| PL1                          | 2.00 dB         |
| PL1W                         | 15.80138493 W   |
| SFO1                         | 500.1323022 MHz |
| ===== GRADIENT CHANNEL ===== |                 |
| GPNAME1                      | SINE.100        |
| GPZ1                         | 80.00 %         |
| P16                          | 1000.00 usec    |
| ND0                          | 1               |
| TD                           | 256             |
| SFO1                         | 500.1323 MHz    |
| FIDRES                       | 29.296875 Hz    |
| SW                           | 14.996 ppm      |
| FnMODE                       | States-TPPI     |
| SI                           | 1024            |
| SF                           | 500.130000 MHz  |
| WDW                          | QSINE           |
| SSB                          | 2               |
| LB                           | 0.00 Hz         |
| GB                           | 0               |
| PC                           | 1.00            |
| SI                           | 1024            |
| MC2                          | States-TPPI     |
| SF                           | 500.130000 MHz  |
| WDW                          | QSINE           |
| SSB                          | 2               |
| LB                           | 0.00 Hz         |
| GB                           | 0               |



yz-II94  
 NU\_NOESY\_manualSW DMSO {E:\A-500\Silverman} yzh966 56

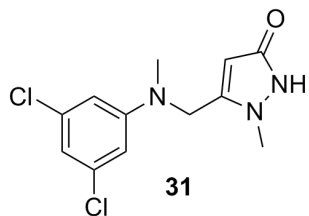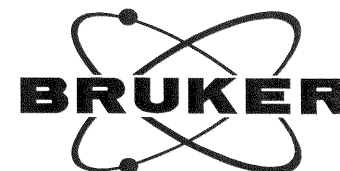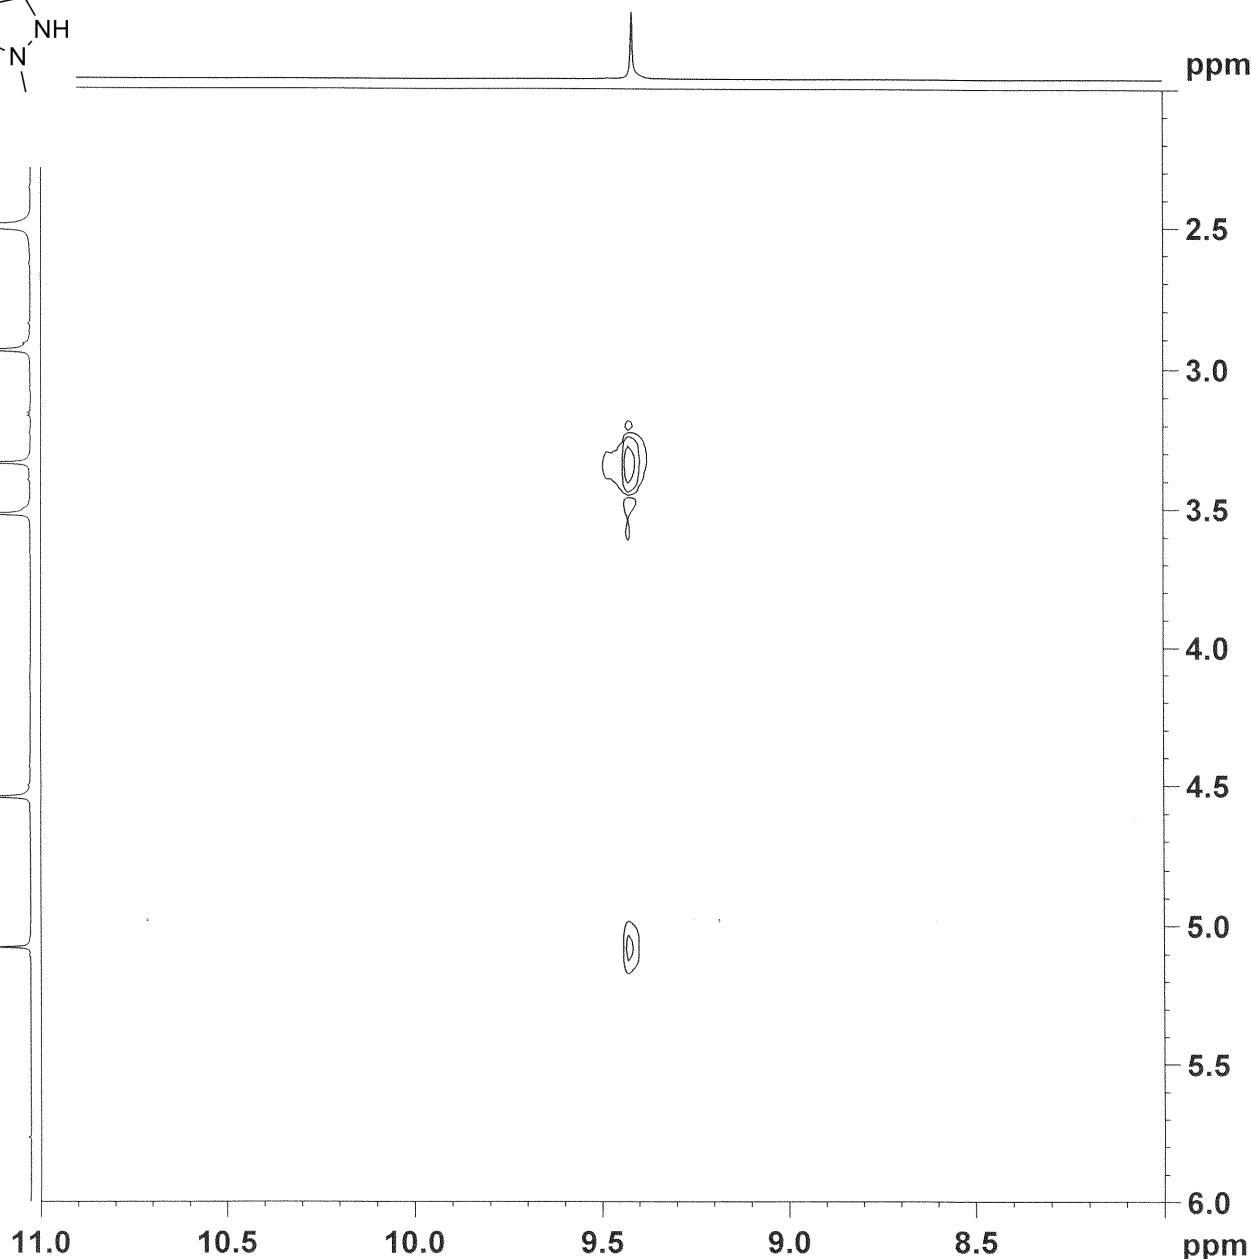

NAME yz-II94  
 EXPNO 15  
 PROCNO 1  
 Date\_ 20111001  
 Time\_ 22.35  
 INSTRUM spect  
 PROBHD 5 mm CPDCH 13C  
 PULPROG noesygpph  
 TD 2048  
 SOLVENT DMSO  
 NS 16  
 DS 4  
 SWH 7500.000 Hz  
 FIDRES 3.662109 Hz  
 AQ 0.1365833 sec  
 RG 406  
 DW 66.667 usec  
 DE 35.00 usec  
 TE 298.2 K  
 D0 0.00005304 sec  
 D1 2.00000000 sec  
 D8 0.30000001 sec  
 D16 0.00020000 sec  
 IN0 0.00013335 sec

===== CHANNEL f1 =====  
 NUC1 1H  
 P1 10.70 usec  
 P2 21.40 usec  
 PL1 2.00 dB  
 PL1W 15.80138493 W  
 SFO1 500.1323022 MHz

===== GRADIENT CHANNEL =====  
 GPNAM1 SINE.100  
 GPZ1 80.00 %  
 P16 1000.00 usec  
 ND0 1  
 TD 256  
 SFO1 500.1323 MHz  
 FIDRES 29.296875 Hz  
 SW 14.996 ppm  
 FnMODE States-TPPI  
 SI 1024  
 SF 500.1300000 MHz  
 WDW QSINE  
 SSB 2  
 LB 0.00 Hz  
 GB 0  
 PC 1.00  
 SI 1024  
 MC2 States-TPPI  
 SF 500.1300000 MHz  
 WDW QSINE  
 SSB 2  
 LB 0.00 Hz  
 GB 0

7.255  
6.786  
6.783  
6.780  
6.657  
6.654

4.226

3.322  
3.081  
2.821

1.860  
1.644  
1.243

yz-Ii192-2  
PROTON CDC13

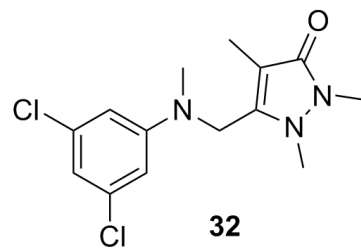

32

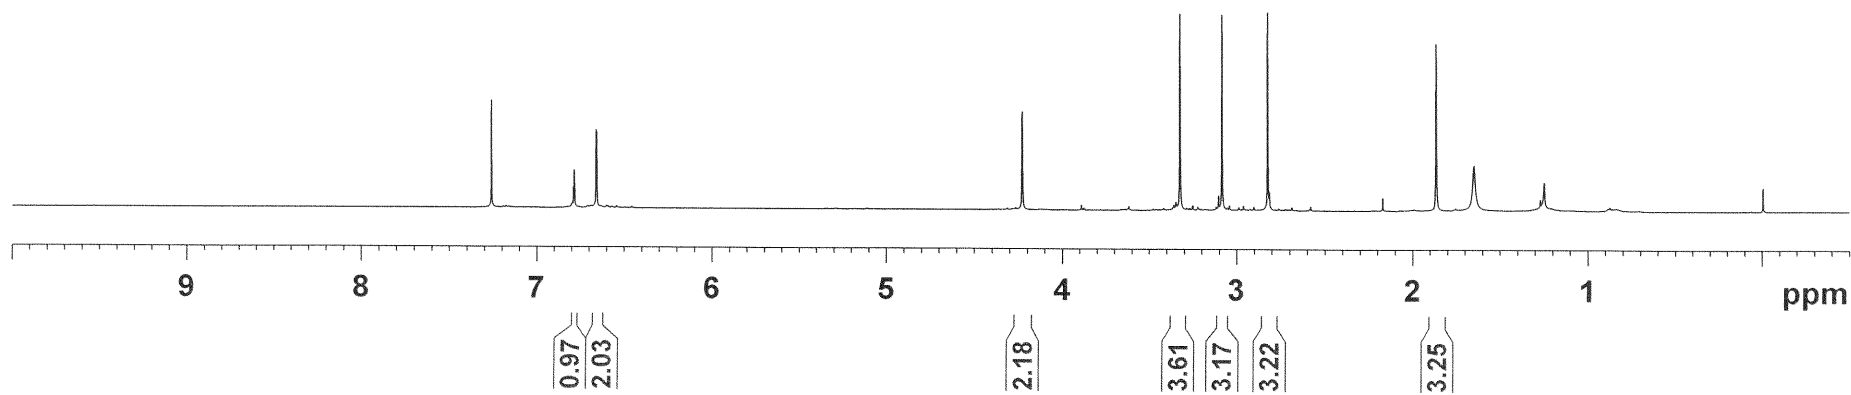

yz-Ii192-2  
NU\_C13\_5mg CDCl<sub>3</sub>

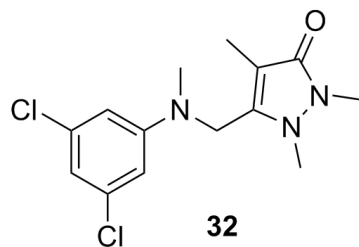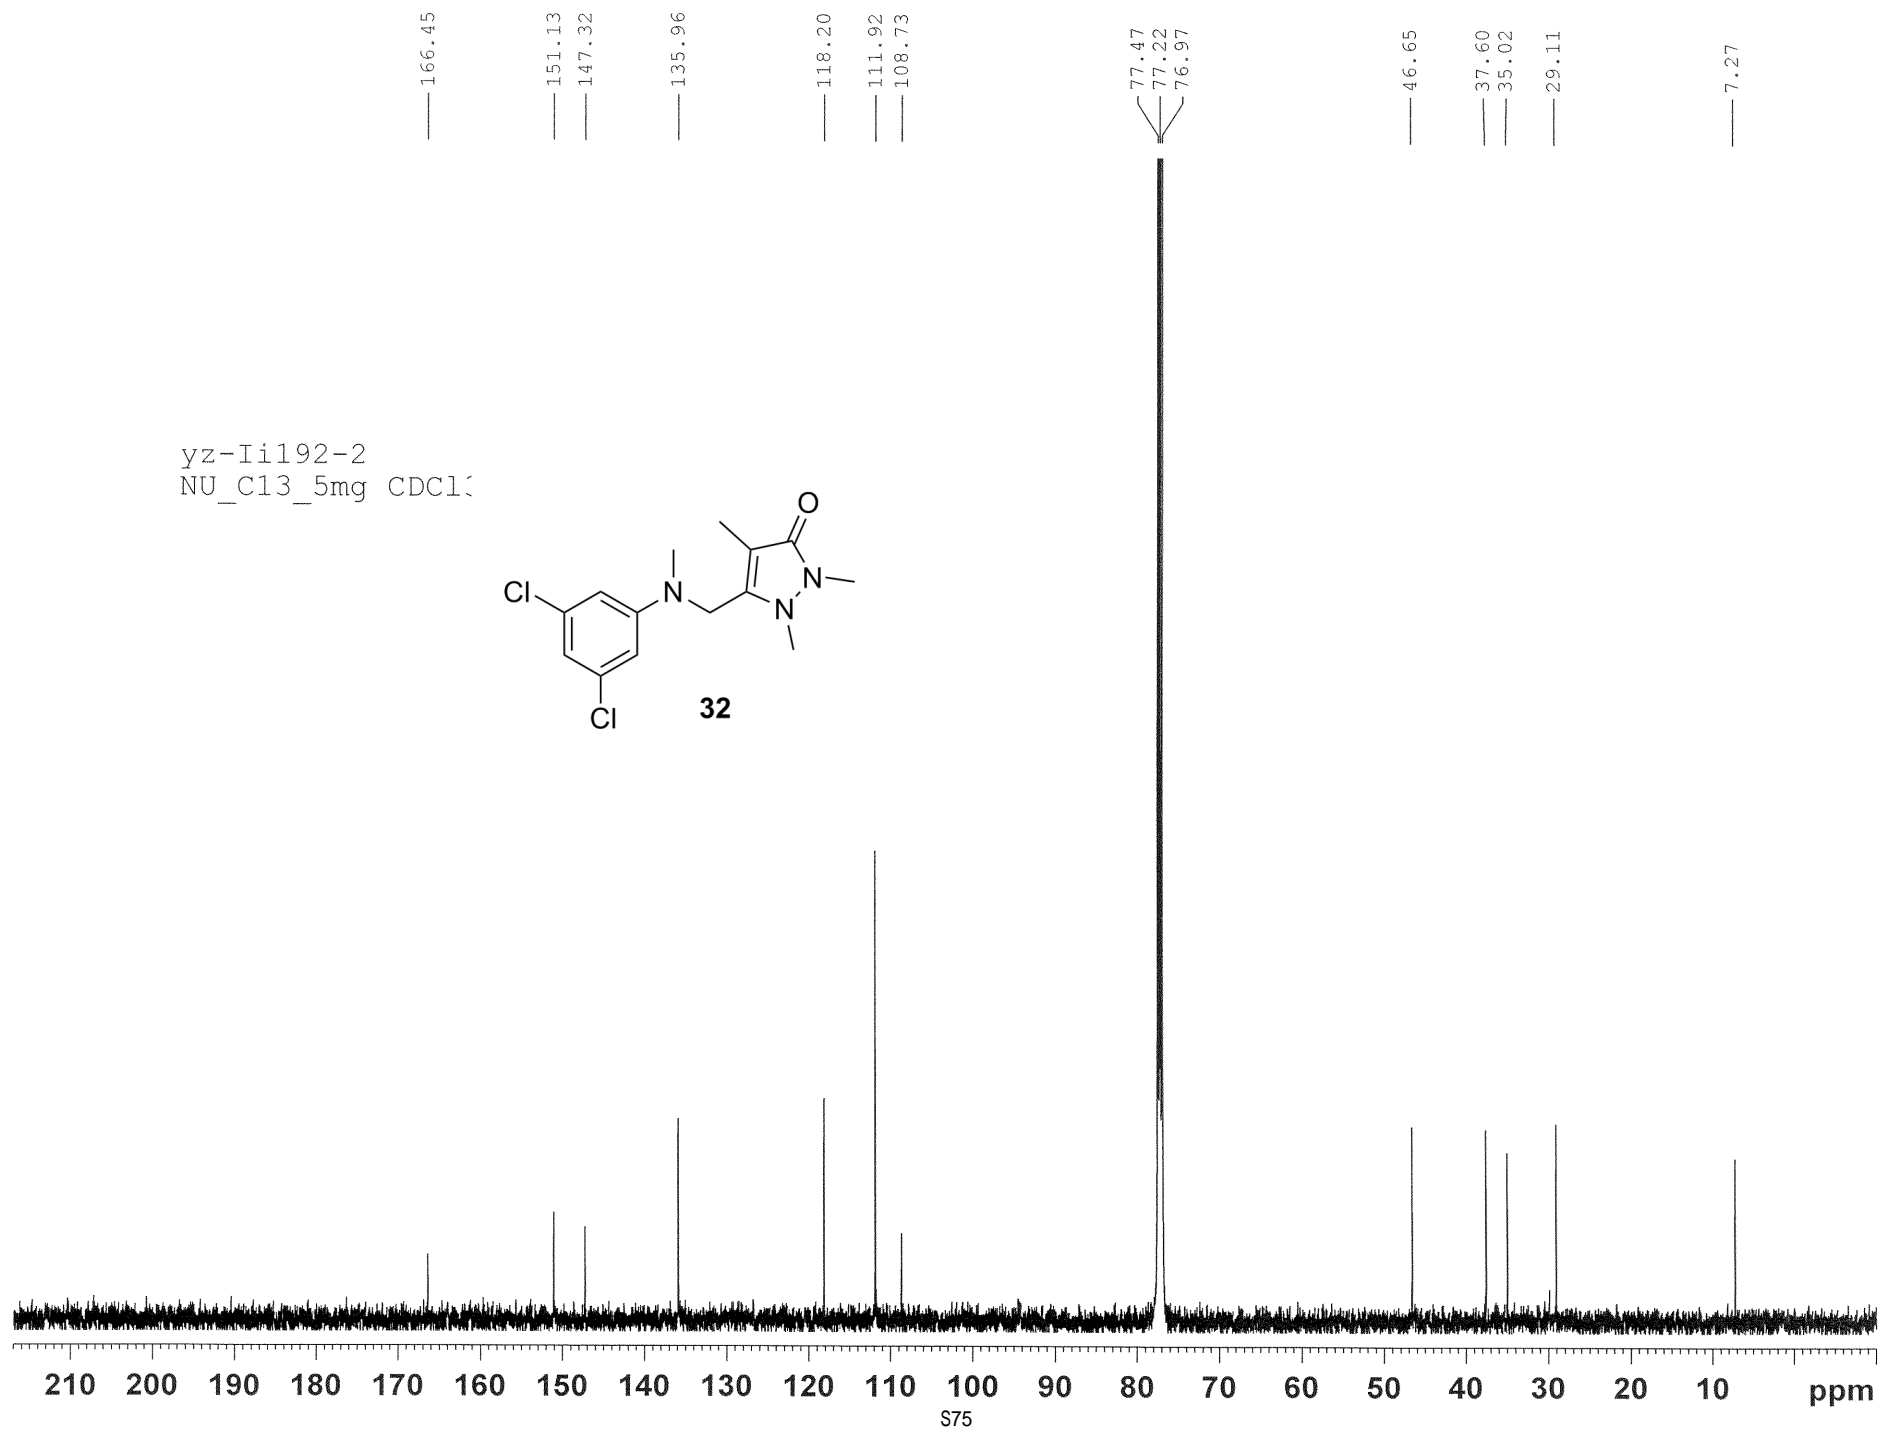

7.260  
6.764  
6.760  
6.757  
6.571  
6.567  
— 5.282  
— 4.266  
3.347  
3.254  
3.250  
2.962

yz-III192-3  
PROTON CDC13

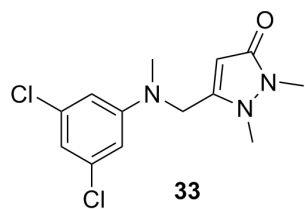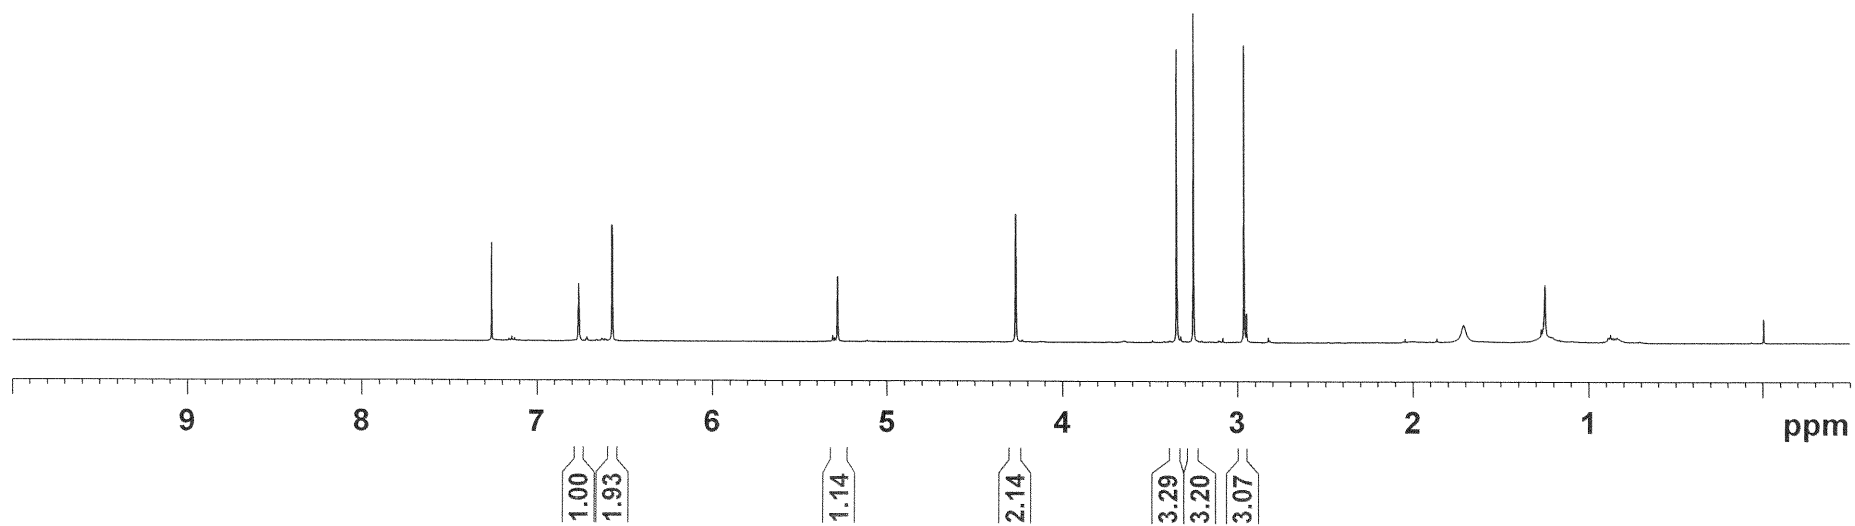

yz-III192-3  
NU\_C13\_5mg CDCl<sub>3</sub>

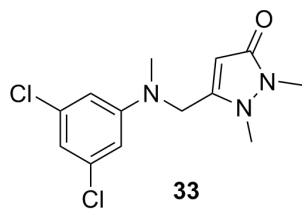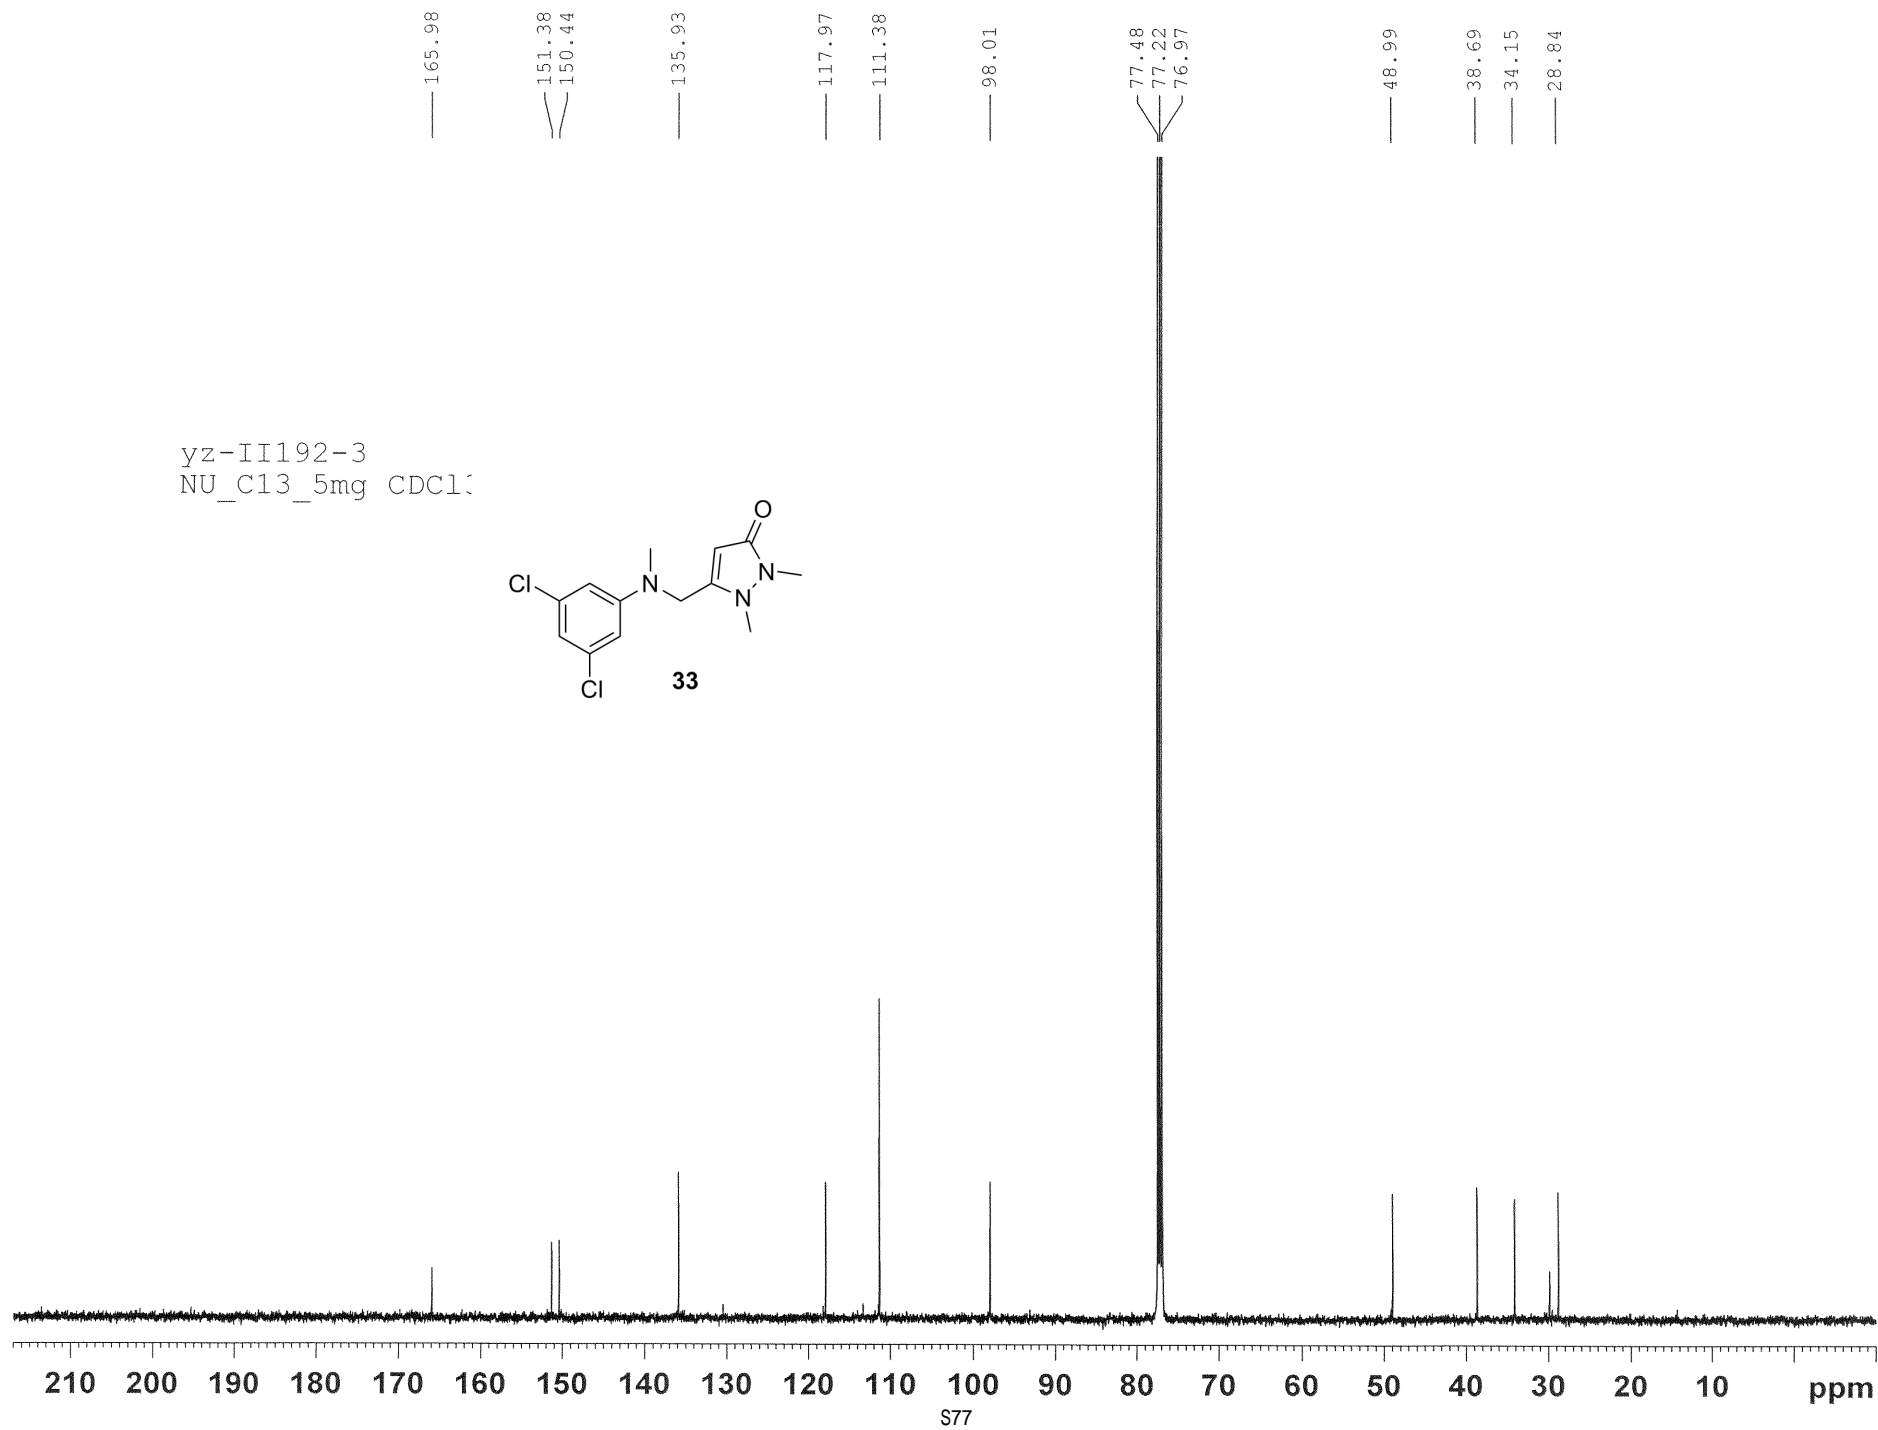

7.260  
6.723  
6.720  
6.717  
6.580  
6.577

4.169

3.299  
3.295  
2.998  
2.987

1.234

yz-III192-4  
PROTON CDC13

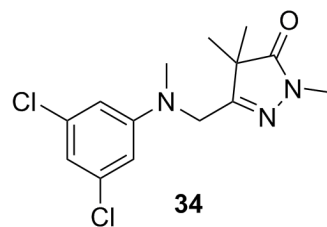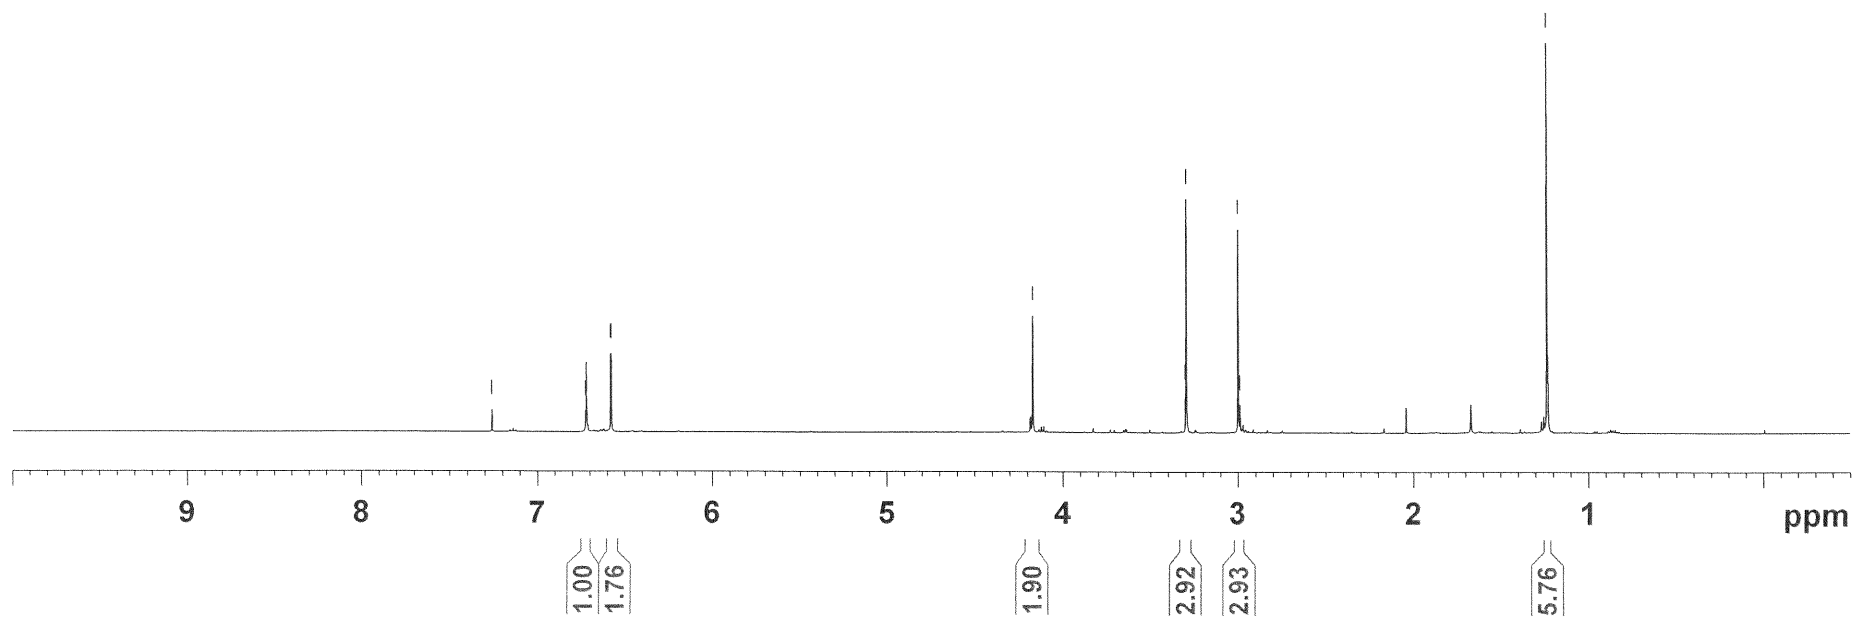

yz-II192-4  
NU\_C13\_5mg CDCl<sub>3</sub>

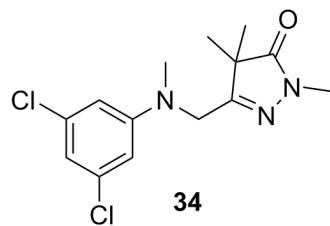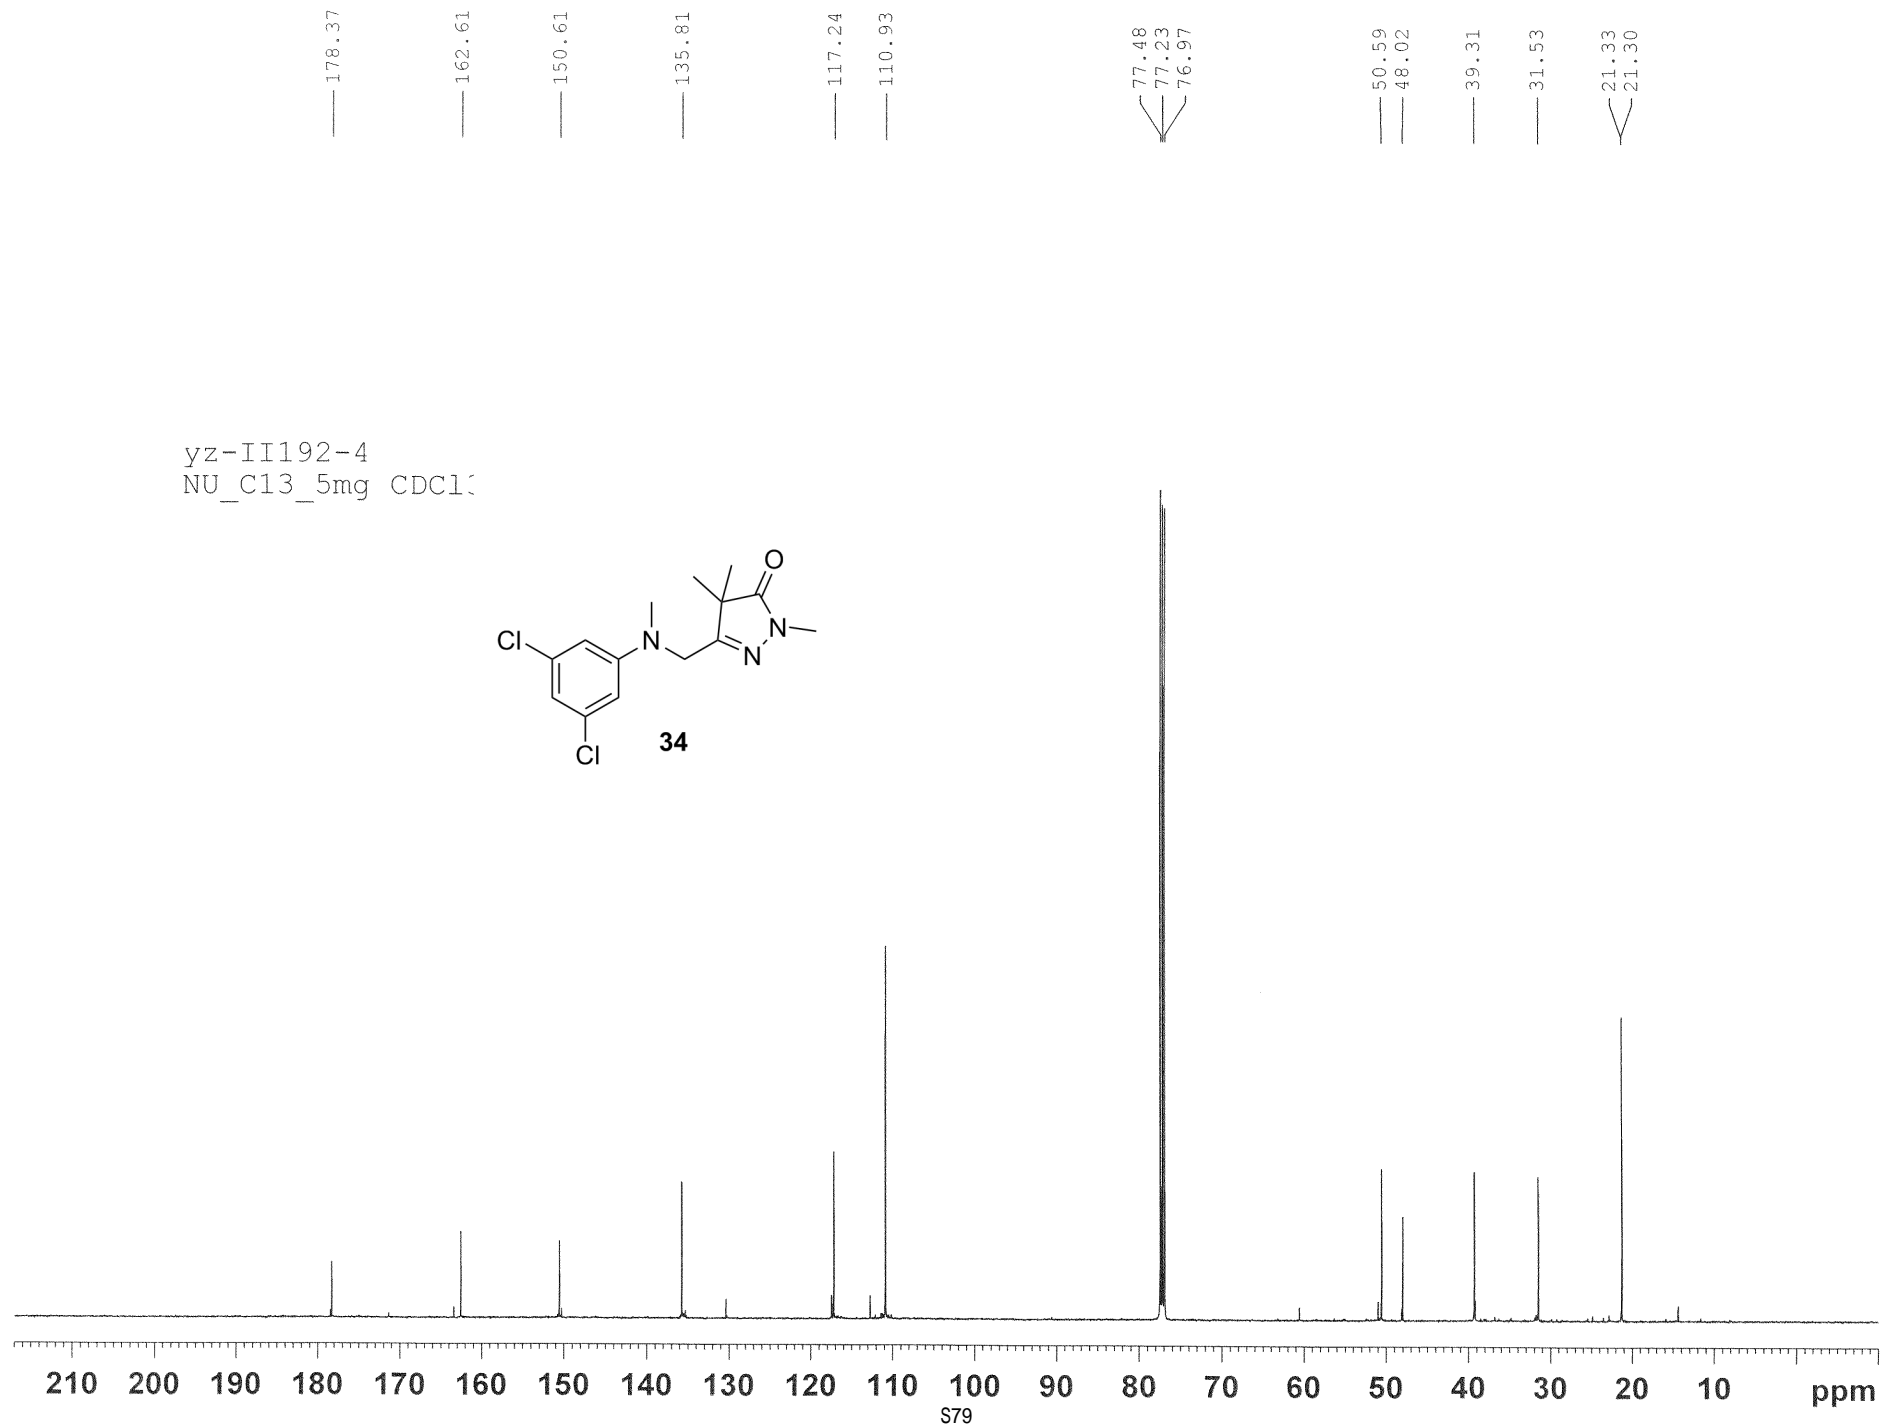

— 10.991

7.122  
7.098

— 5.417

— 4.880

3.489  
3.374

— 2.498

yz-IV30  
PROTON DMSO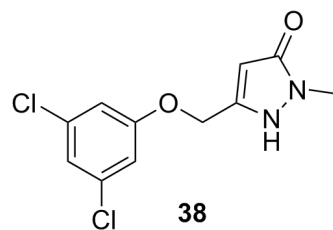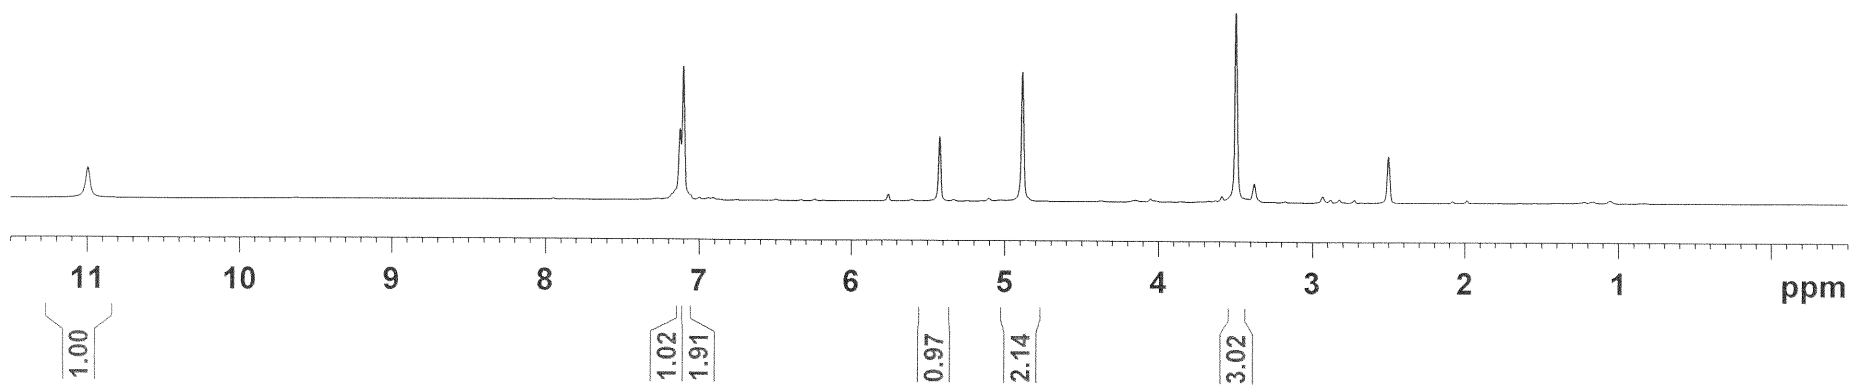



yz-IV30  
NU\_C13\_5mg DMSO

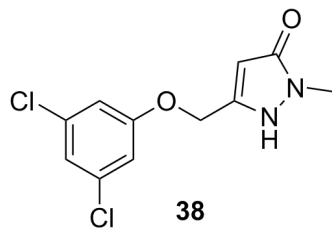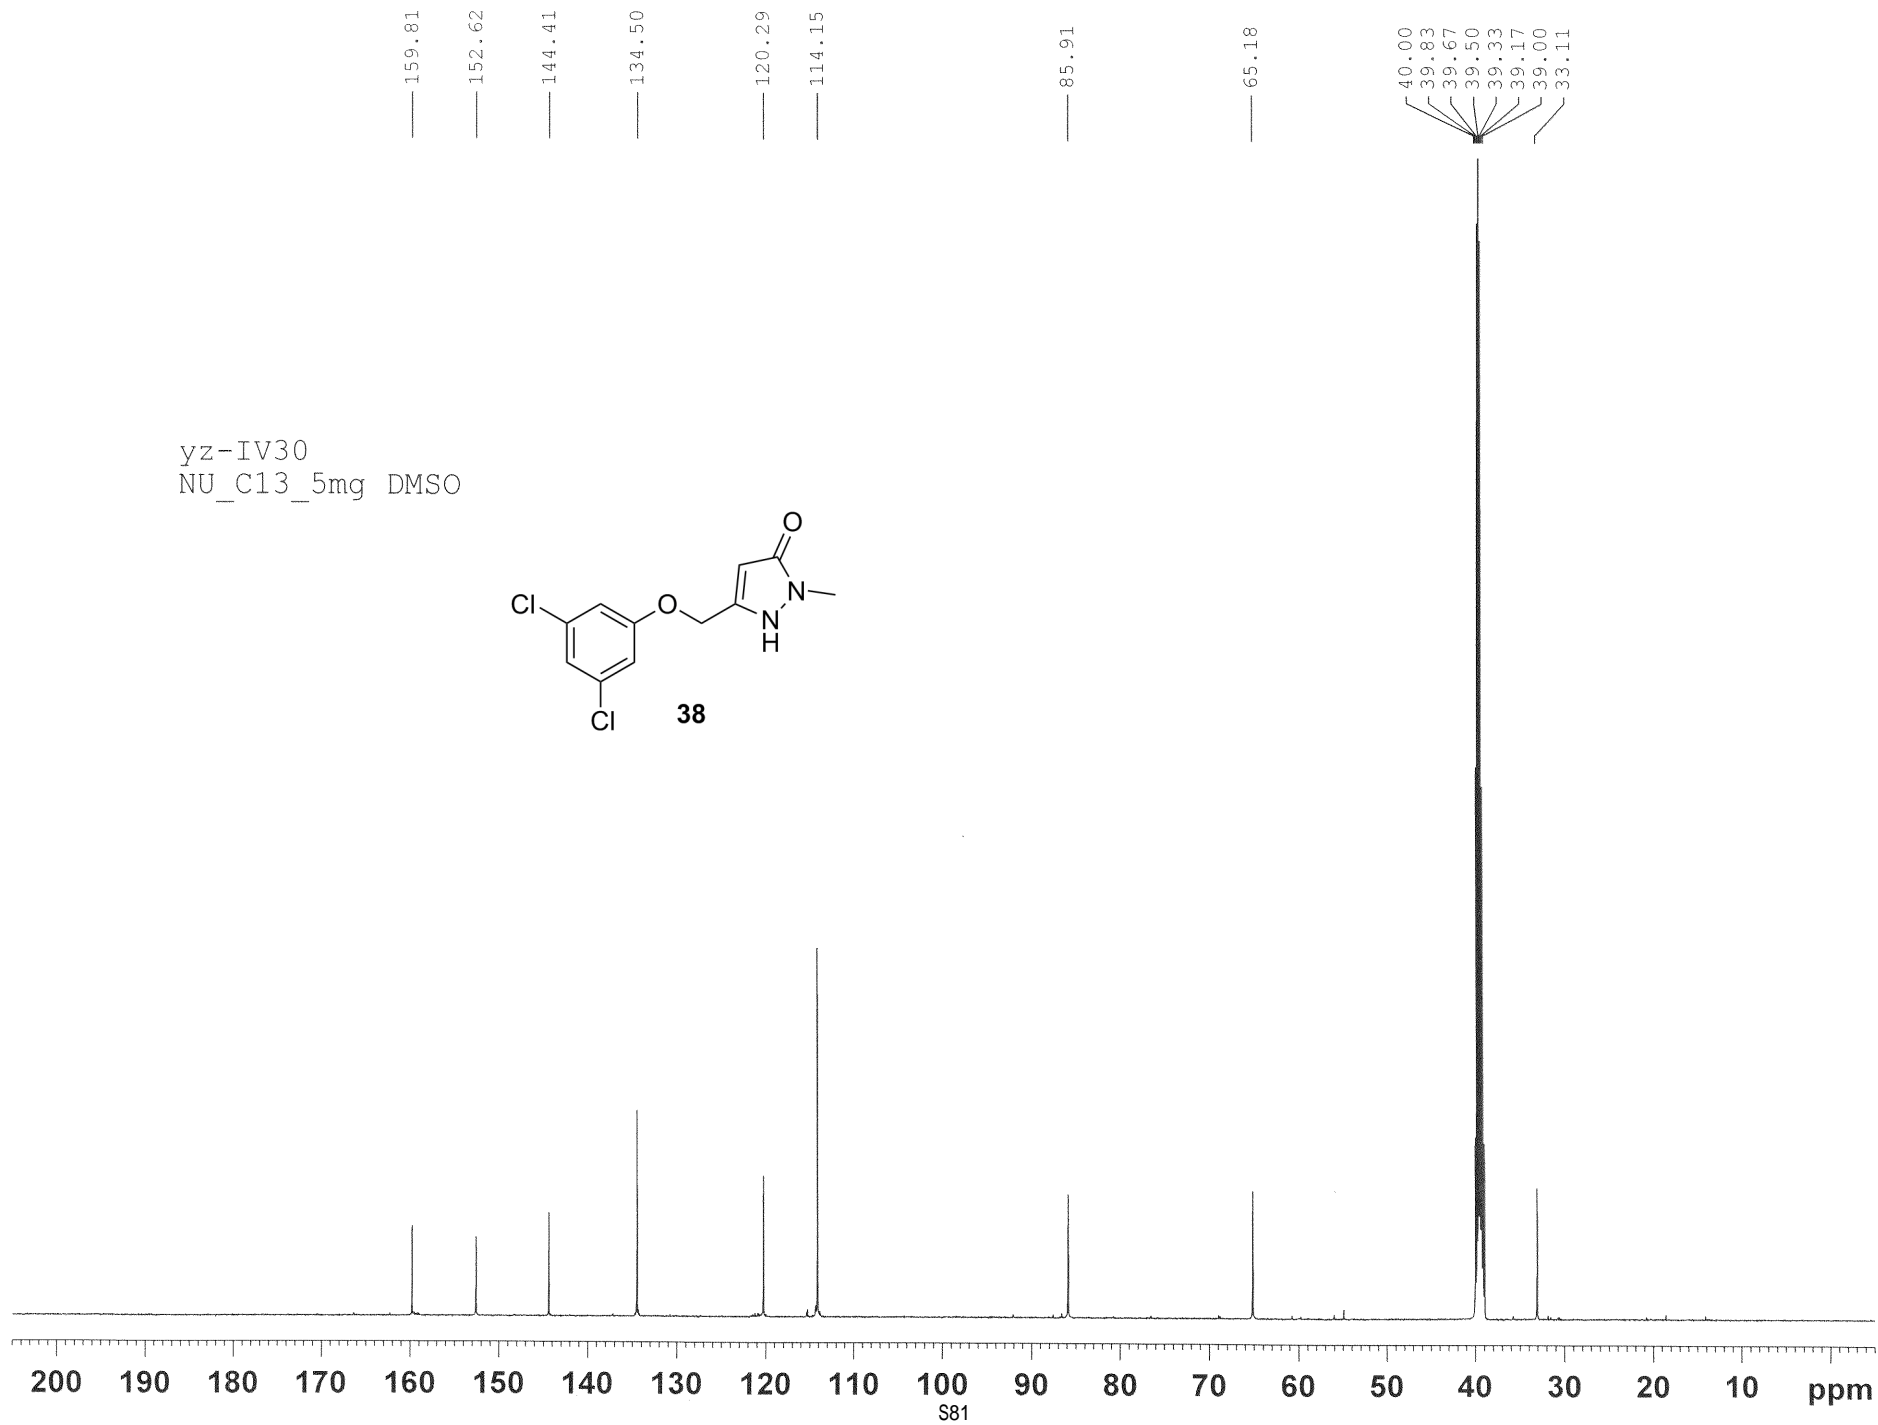

yz-IV30  
NU\_HSQC\_manualSW DMSO {E:\A-500\Silverman} yzh966 53

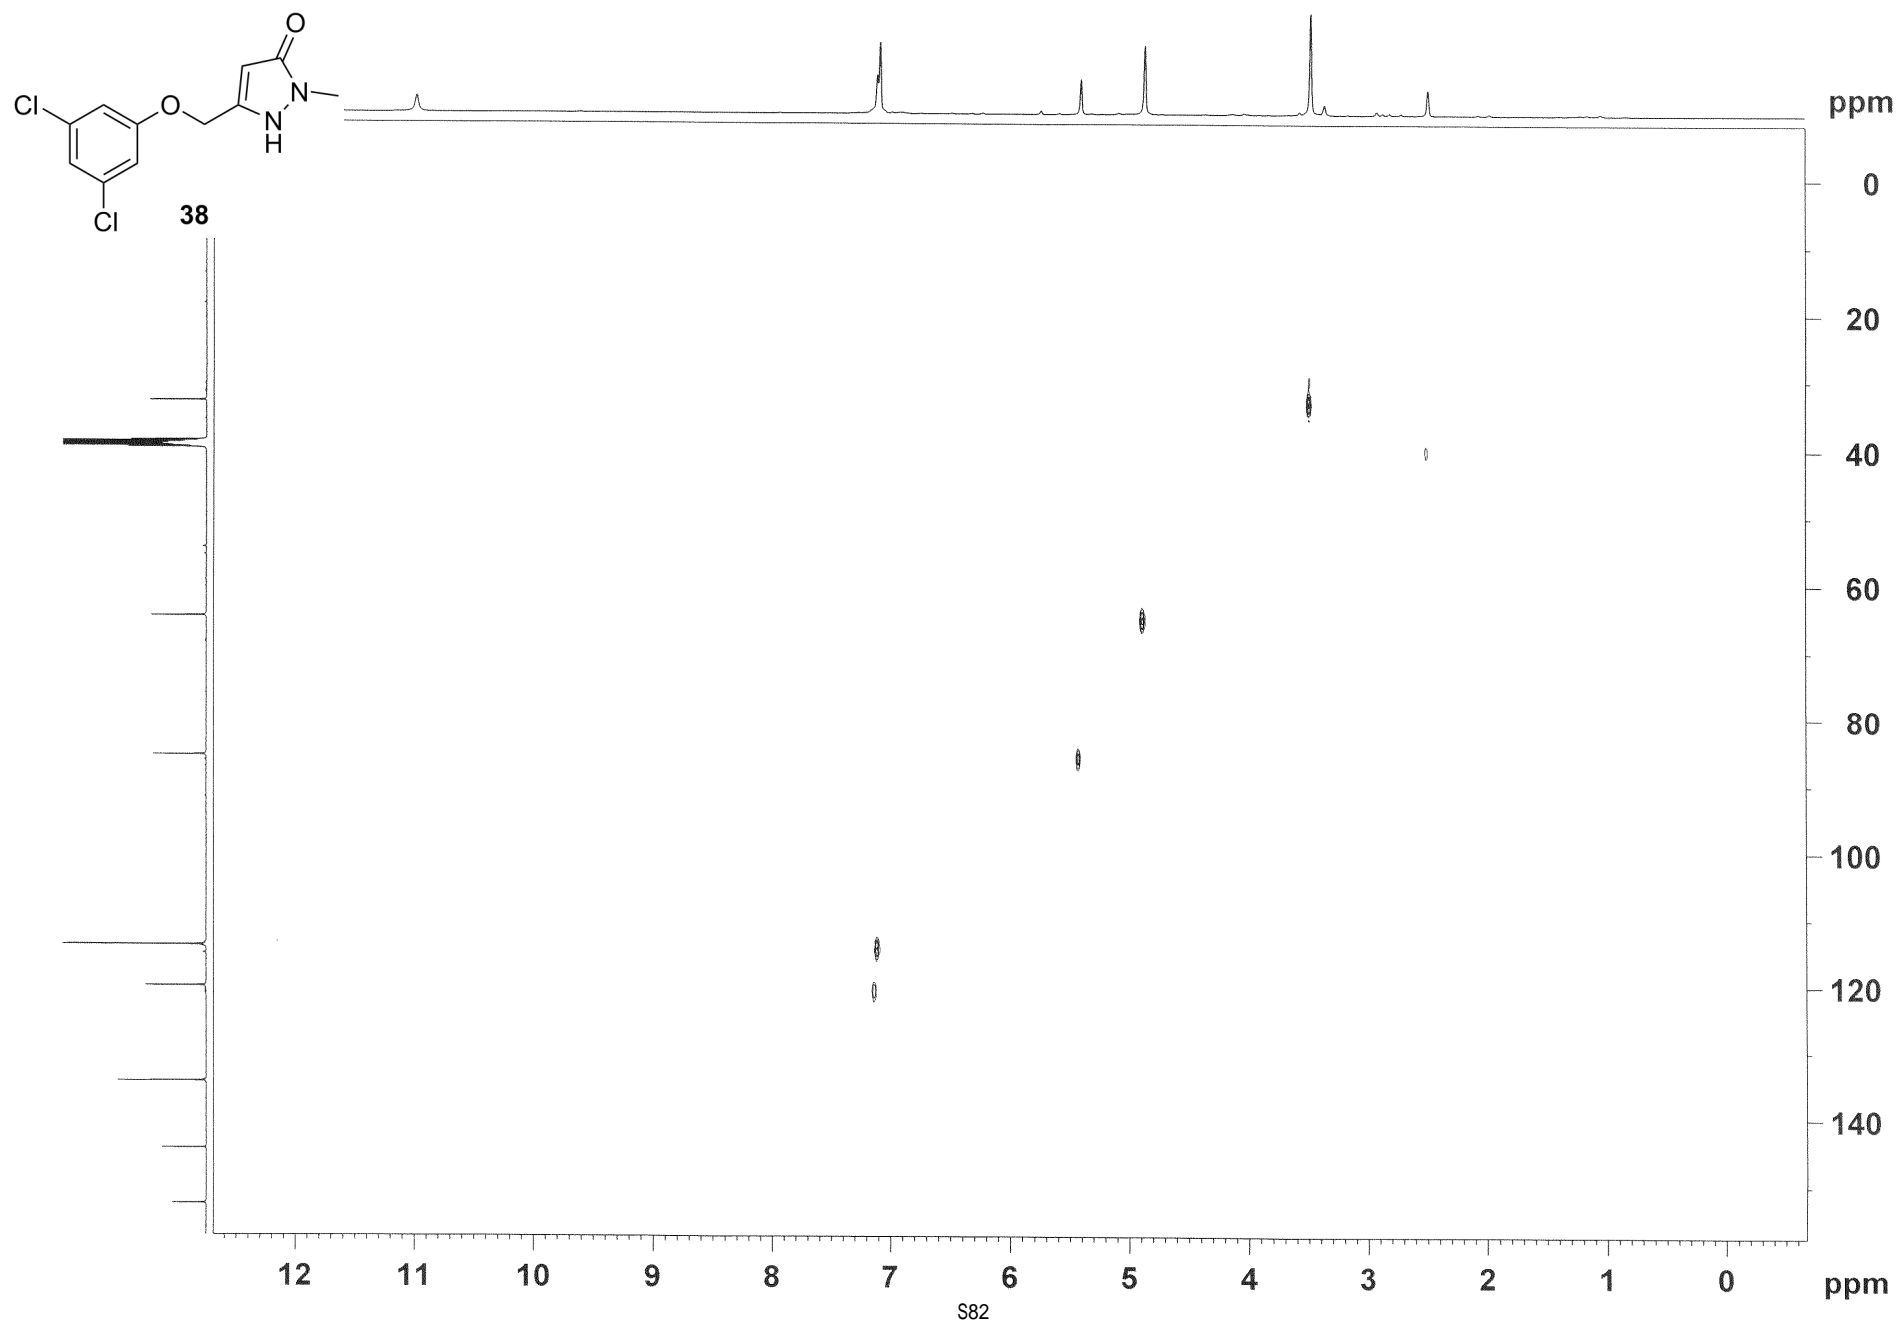

yz-IV30  
NU\_HMBC\_manualSW DMSO {E:\A-500\Silverman} yzh966 53

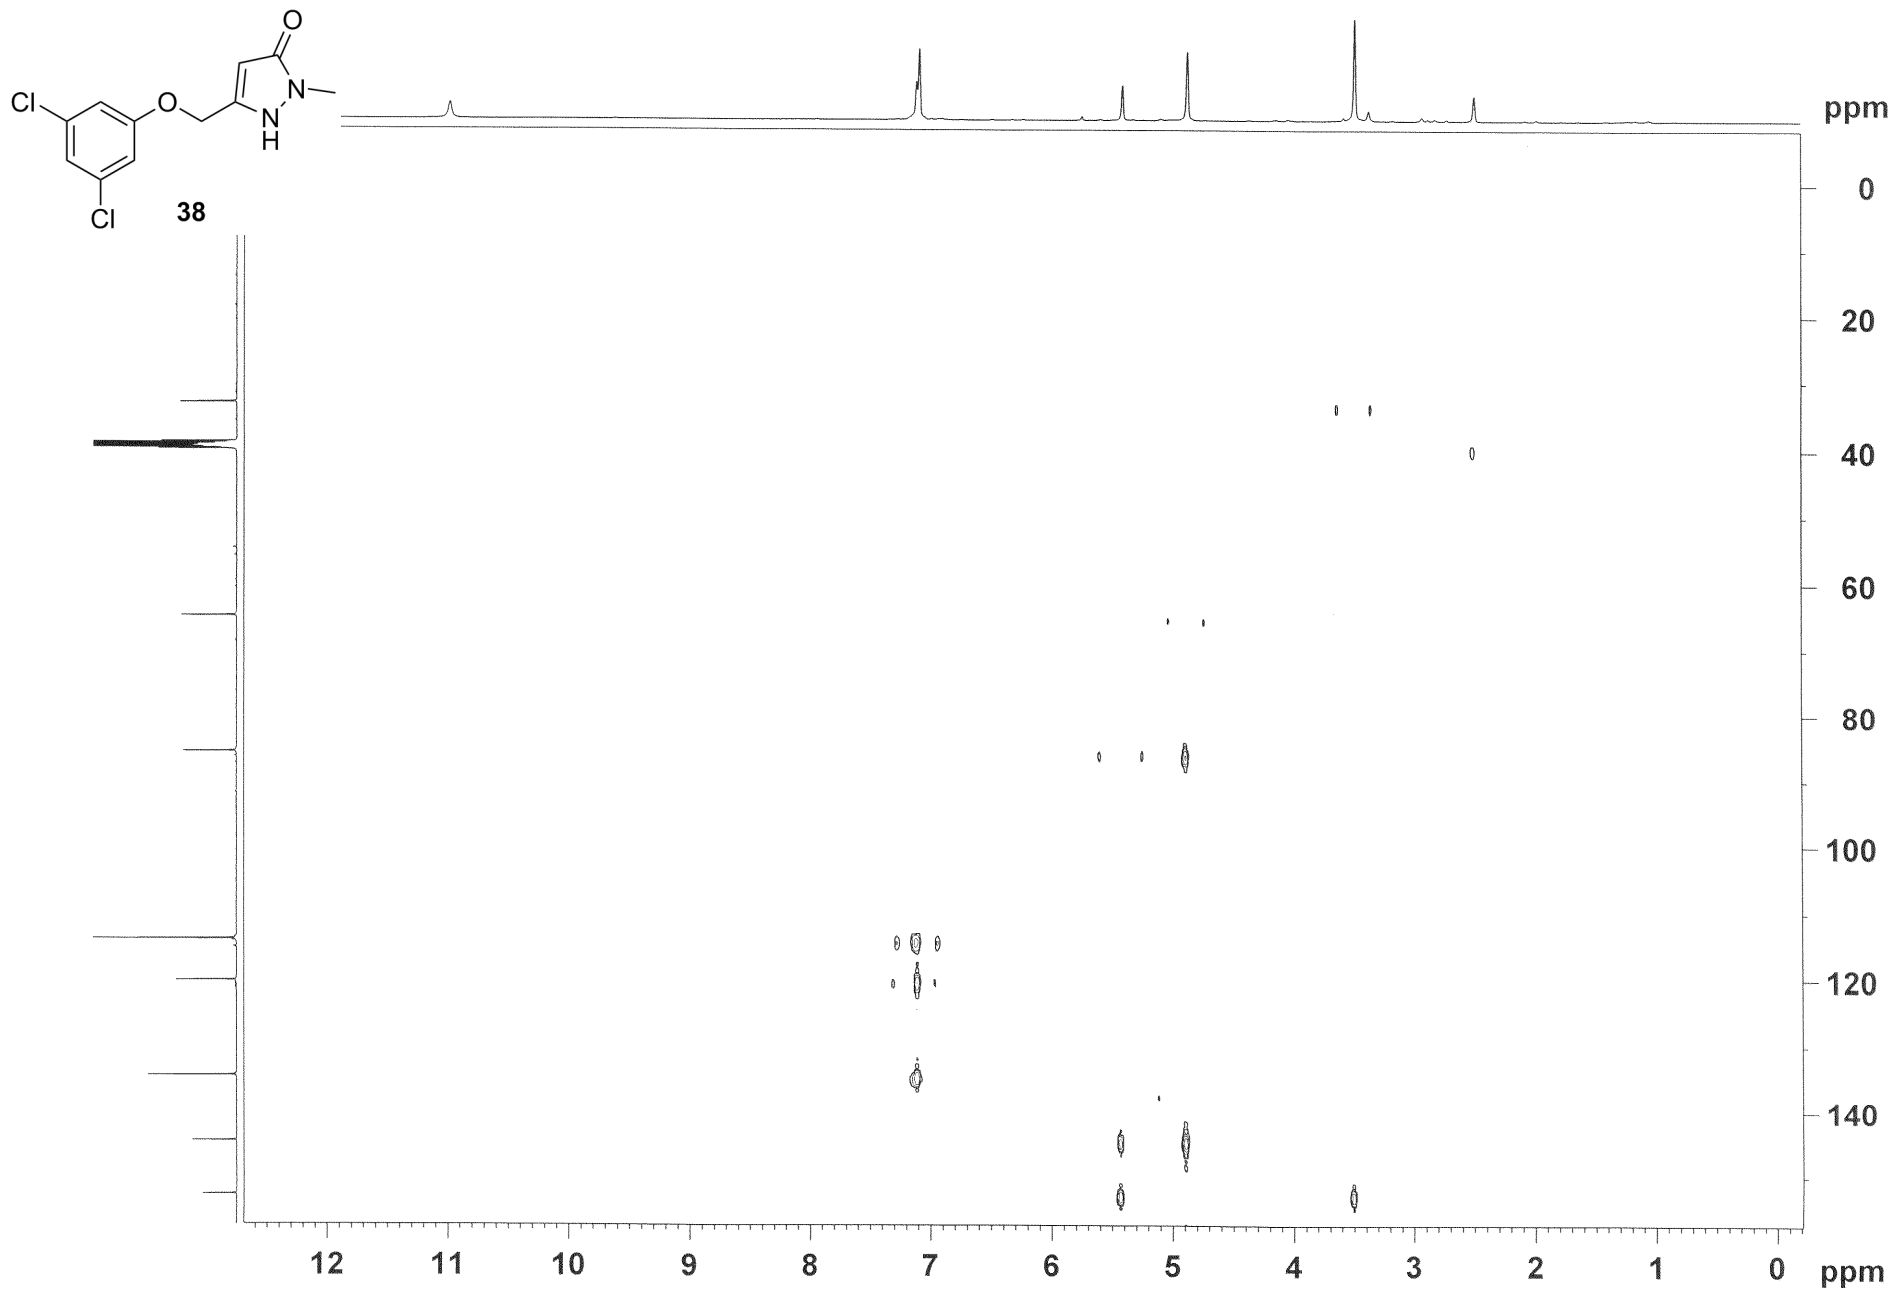

yz-IV30  
 NU\_NOESY\_manualSW DMSO {E:\A-500\Silverman} yzh966 53

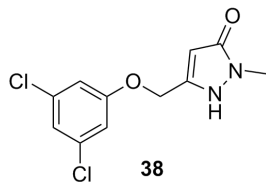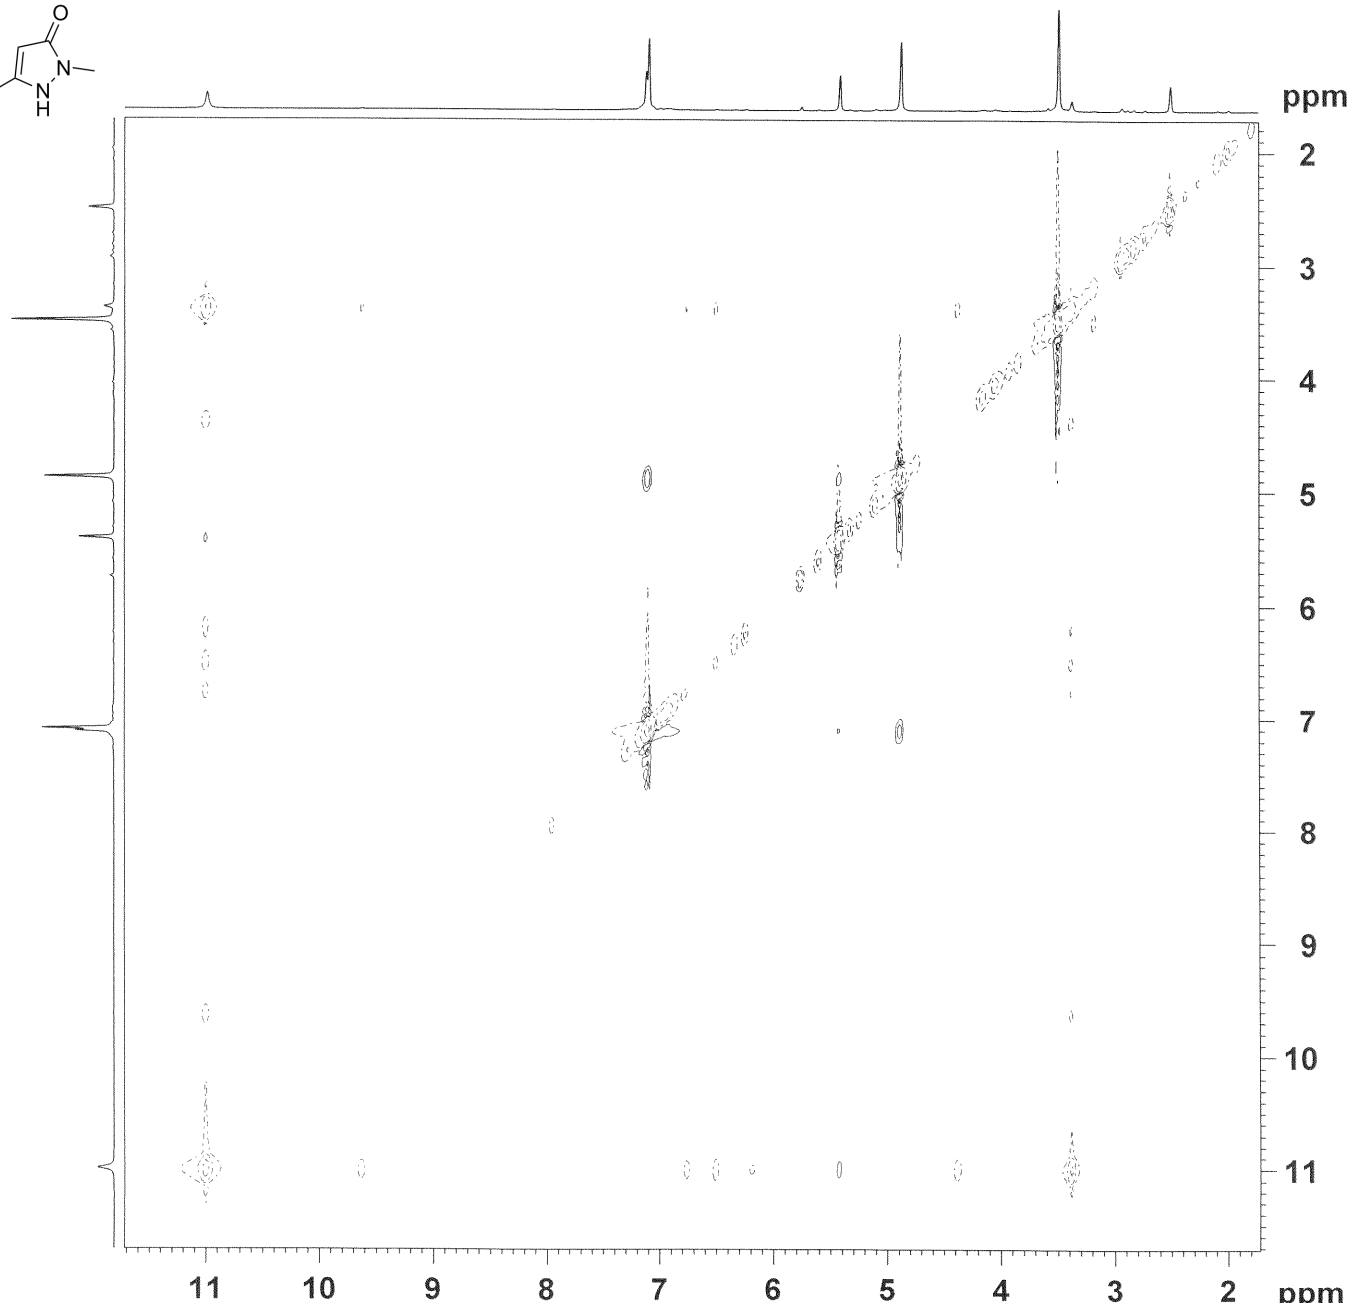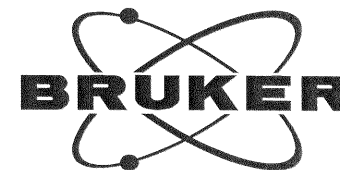

NAME yz-IV30  
 EXPNO 14  
 PROCNO 1  
 Date\_ 20121007  
 Time 17.59  
 INSTRUM spect  
 PROBHD 5 mm CPDCH 13C  
 PULPROG noesypph  
 TD 2048  
 SOLVENT DMSO  
 NS 16  
 DS 4  
 SWH 7500.000 Hz  
 FIDRES 3.662109 Hz  
 AQ 0.1365833 sec  
 RG 114  
 DW 66.667 usec  
 DE 35.00 usec  
 TE 298.2 K  
 D0 0.00005304 sec  
 D1 2.00000000 sec  
 D8 0.30000001 sec  
 D16 0.00020000 sec  
 IN0 0.00013335 sec

===== CHANNEL f1 =====  
 NUC1 1H  
 P1 10.70 usec  
 P2 21.40 usec  
 PL1 2.00 dB  
 PL1W 15.80138493 W  
 SFO1 500.1323022 MHz

===== GRADIENT CHANNEL =====  
 GPNAM1 SINE.100  
 GPZ1 80.00 %  
 P16 1000.00 usec  
 ND0 1  
 TD 256  
 SFO1 500.1323 MHz  
 FIDRES 29.296875 Hz  
 SW 14.996 ppm  
 FnMODE States-TPPI  
 SI 1024  
 SF 500.1300000 MHz  
 WDW QSINE  
 SSB 2  
 LB 0.00 Hz  
 GB 0  
 PC 1.40  
 SI 1024  
 MC2 States-TPPI  
 SF 500.1300000 MHz  
 WDW QSINE  
 SSB 2  
 LB 0.00 Hz  
 GB 0

yz-IV30  
 NU\_NOESY\_manualSW DMSO {E:\A-500\Silverman} yzh966 53

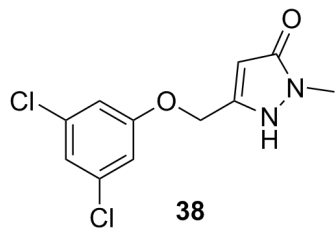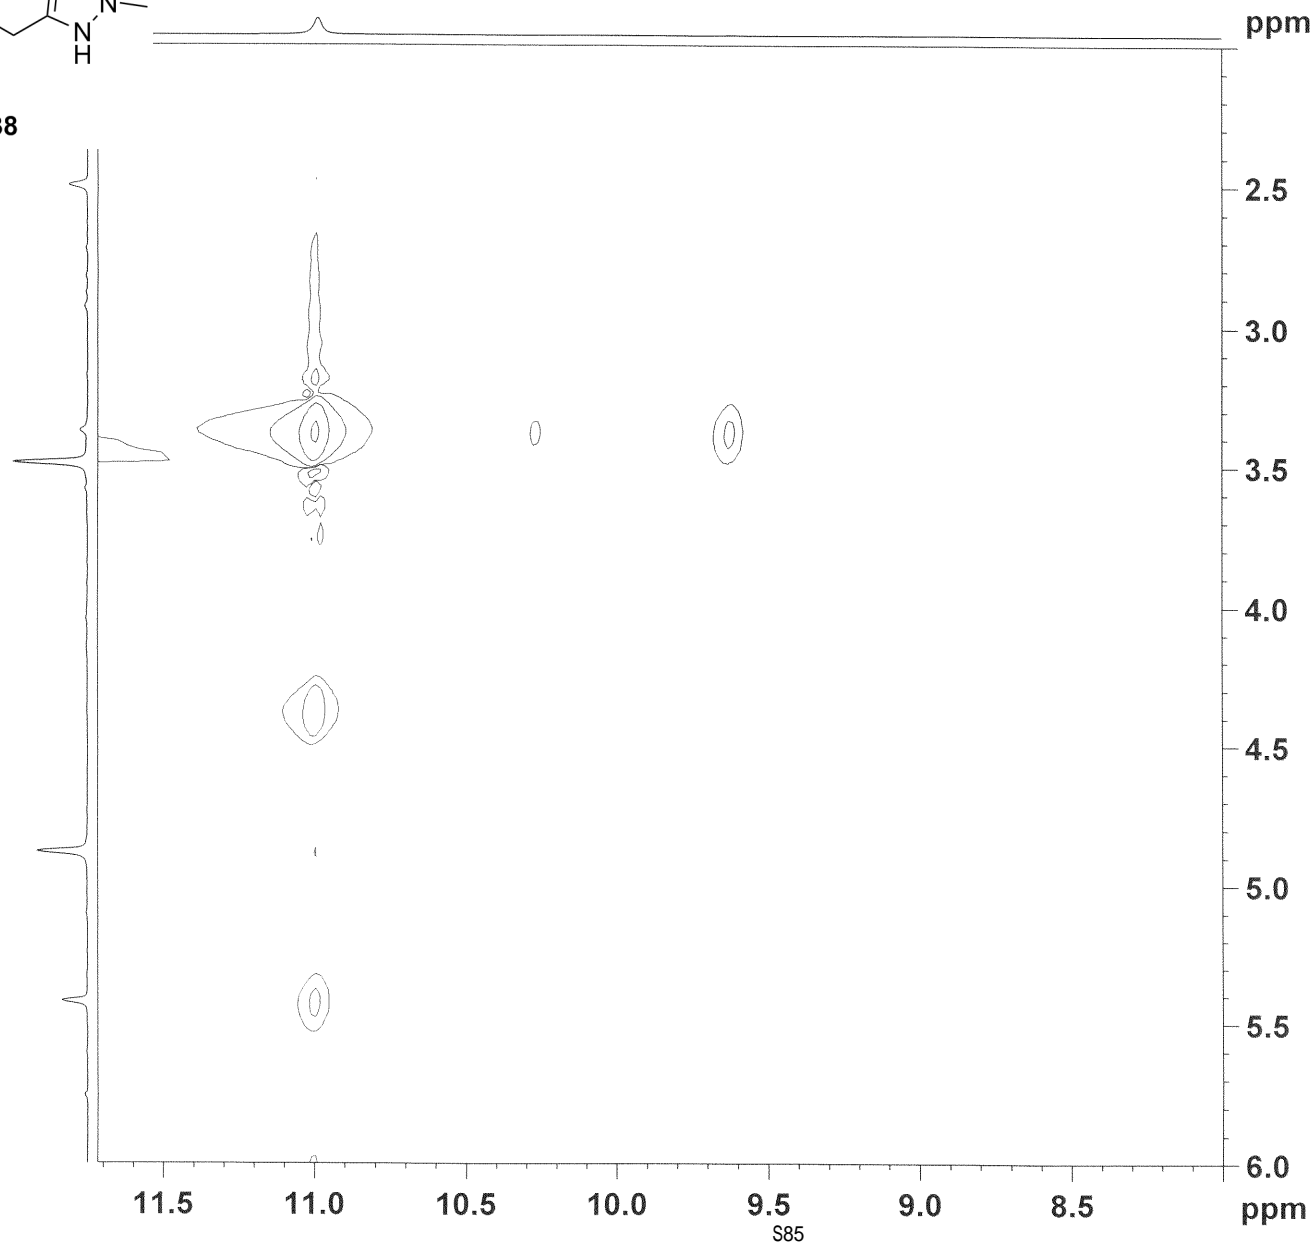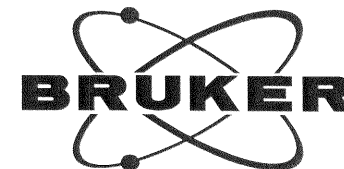

NAME yz-IV30  
 EXPNO 14  
 PROCNO 1  
 Date\_ 20121007  
 Time\_ 17.59  
 INSTRUM spect  
 PROBHD 5 mm CPDCH 13C  
 PULPROG noesygpph  
 TD 2048  
 SOLVENT DMSO  
 NS 16  
 DS 4  
 SWH 7500.000 Hz  
 FIDRES 3.662109 Hz  
 AQ 0.1365833 sec  
 RG 114  
 DW 66.667 usec  
 DE 35.00 usec  
 TE 298.2 K  
 D0 0.00005304 sec  
 D1 2.00000000 sec  
 D8 0.30000001 sec  
 D16 0.00020000 sec  
 IN0 0.00013335 sec

===== CHANNEL f1 =====  
 NUC1 1H  
 P1 10.70 usec  
 P2 21.40 usec  
 PL1 2.00 dB  
 PL1W 15.80138493 W  
 SFO1 500.1323022 MHz

===== GRADIENT CHANNEL =====  
 GPNAM1 SINE.100  
 GPZ1 80.00 %  
 P16 1000.00 usec  
 ND0 1  
 TD 256  
 SFO1 500.1323 MHz  
 FIDRES 29.296875 Hz  
 SW 14.996 ppm  
 FnMODE States-TPPI  
 SI 1024  
 SF 500.1300000 MHz  
 WDW QSINE  
 SSB 2  
 LB 0.00 Hz  
 GB 0  
 PC 1.40  
 SI 1024  
 MC2 States-TPPI  
 SF 500.1300000 MHz  
 WDW QSINE  
 SSB 2  
 LB 0.00 Hz  
 GB 0

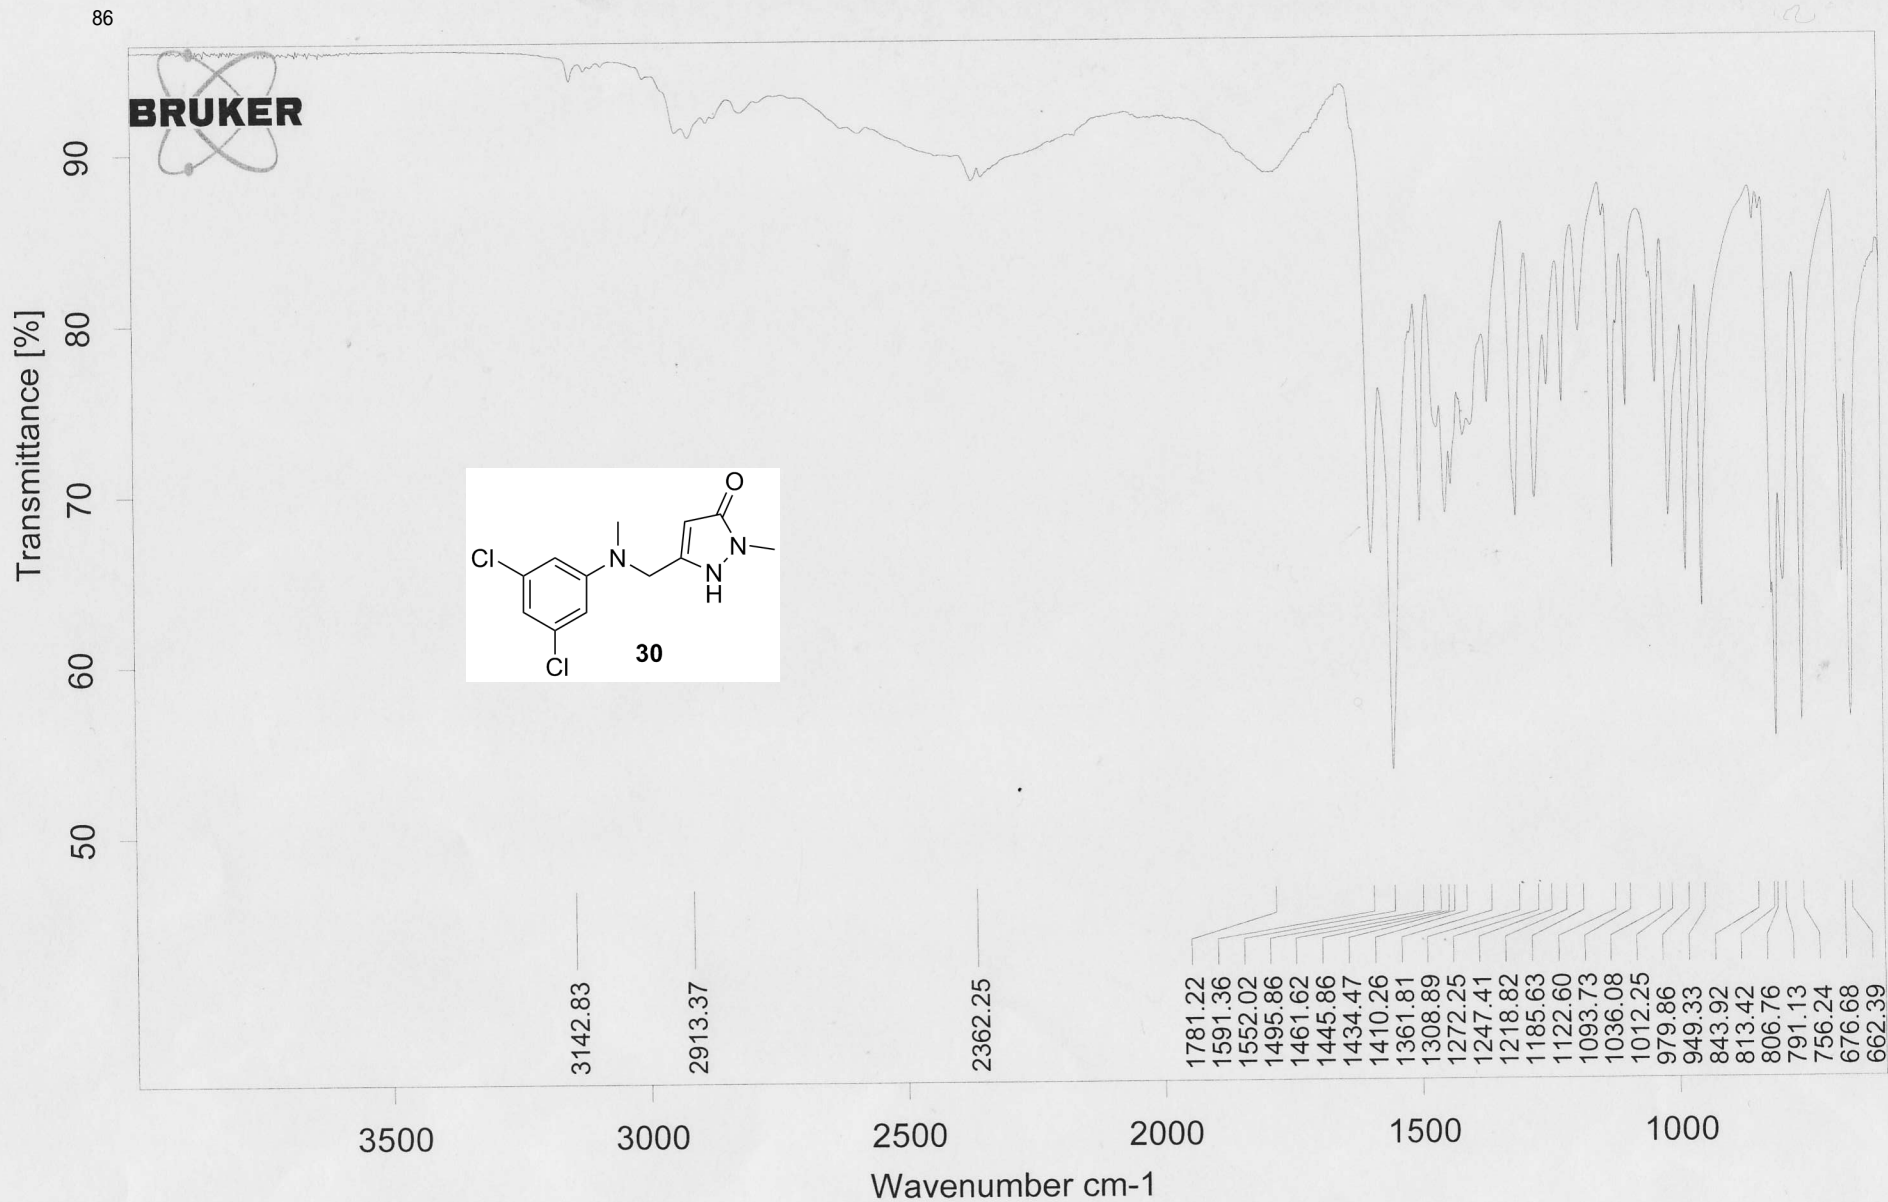

C:\Program Files\OPUS\_65\Data\Silverman\YZ-II25(solid).1

YZ-II25(solid)

Instrument type and / or accessory

04/10/2012

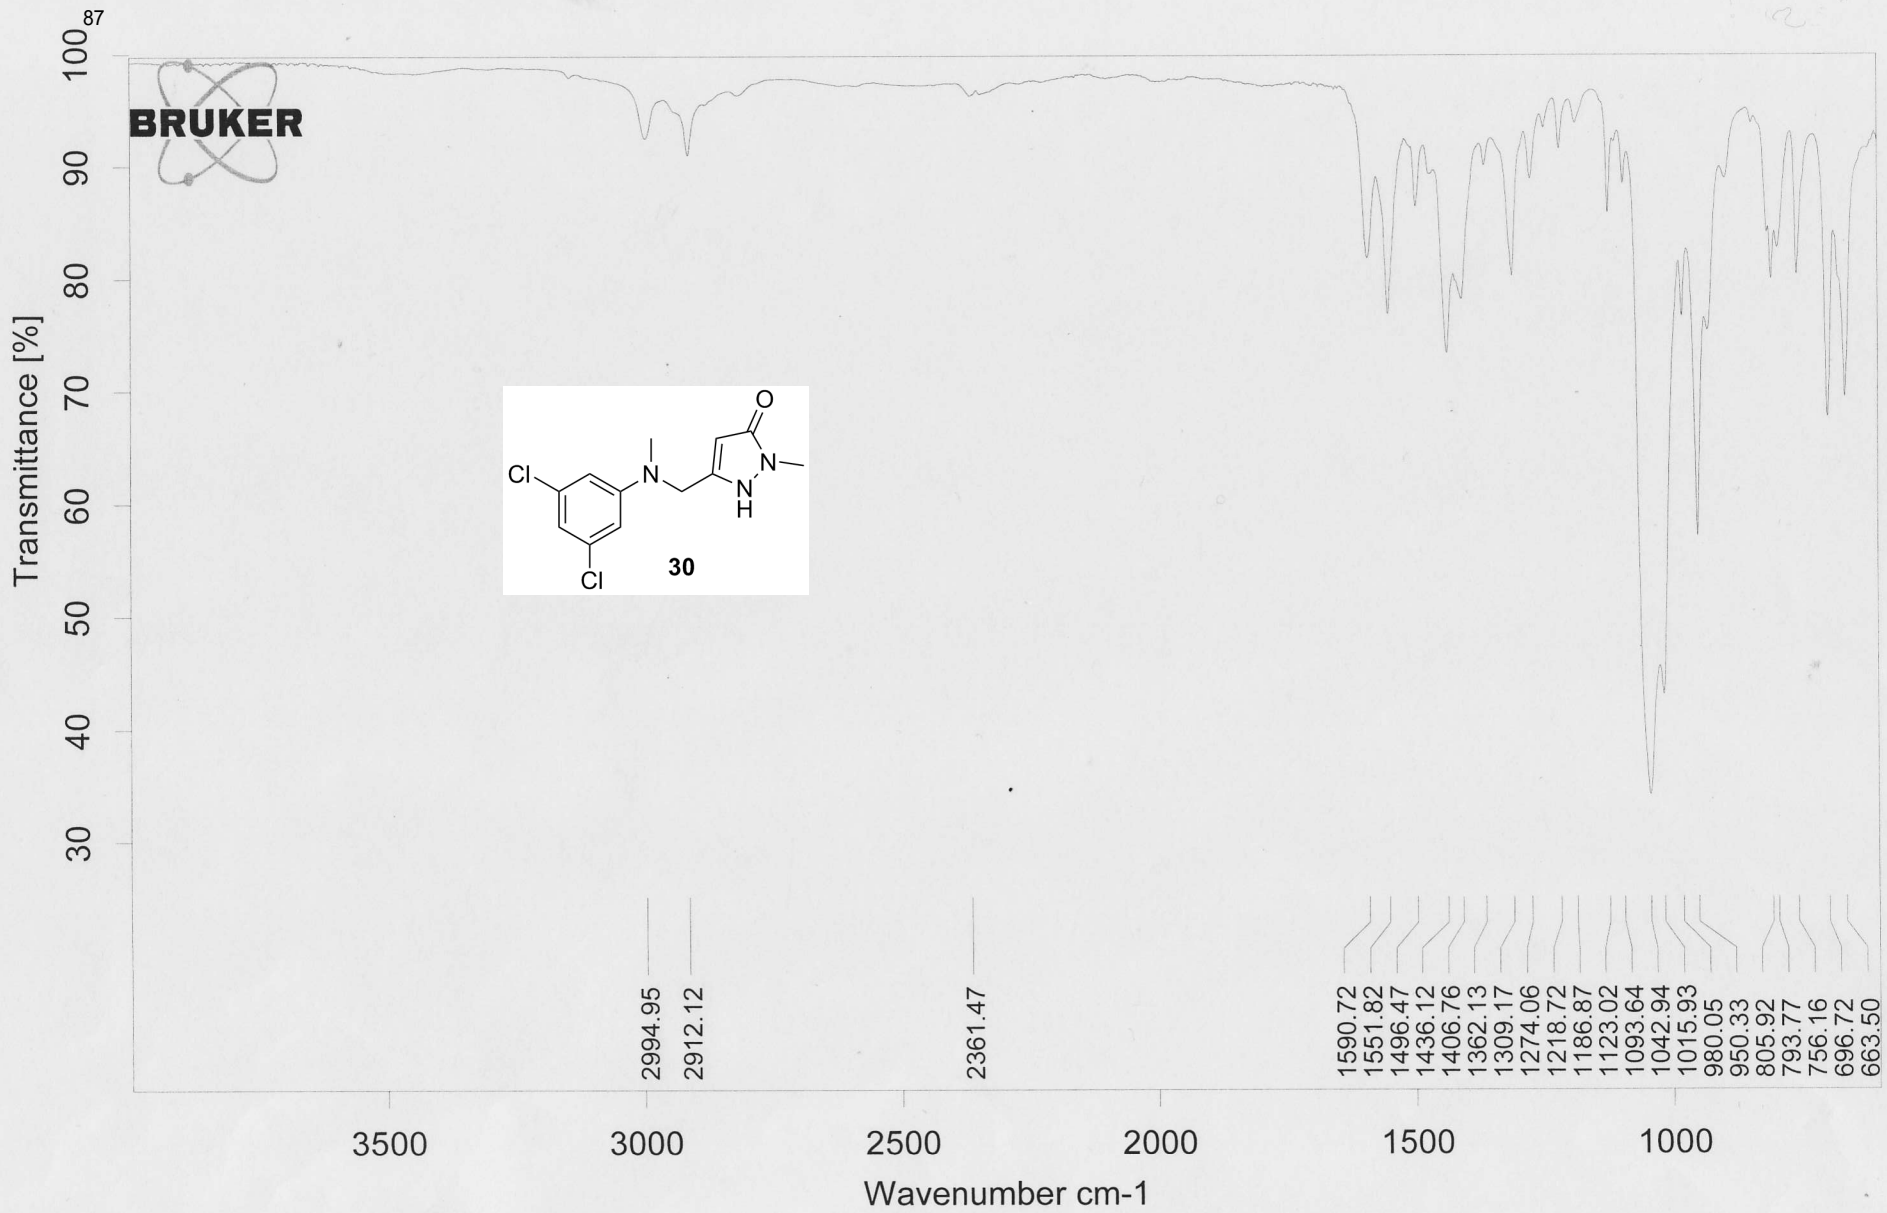

C:\Program Files\OPUS\_65\Data\Silverman\YZ-II25(DMSO).1

YZ-II25(DMSO)

Instrument type and / or accessory

04/10/2012



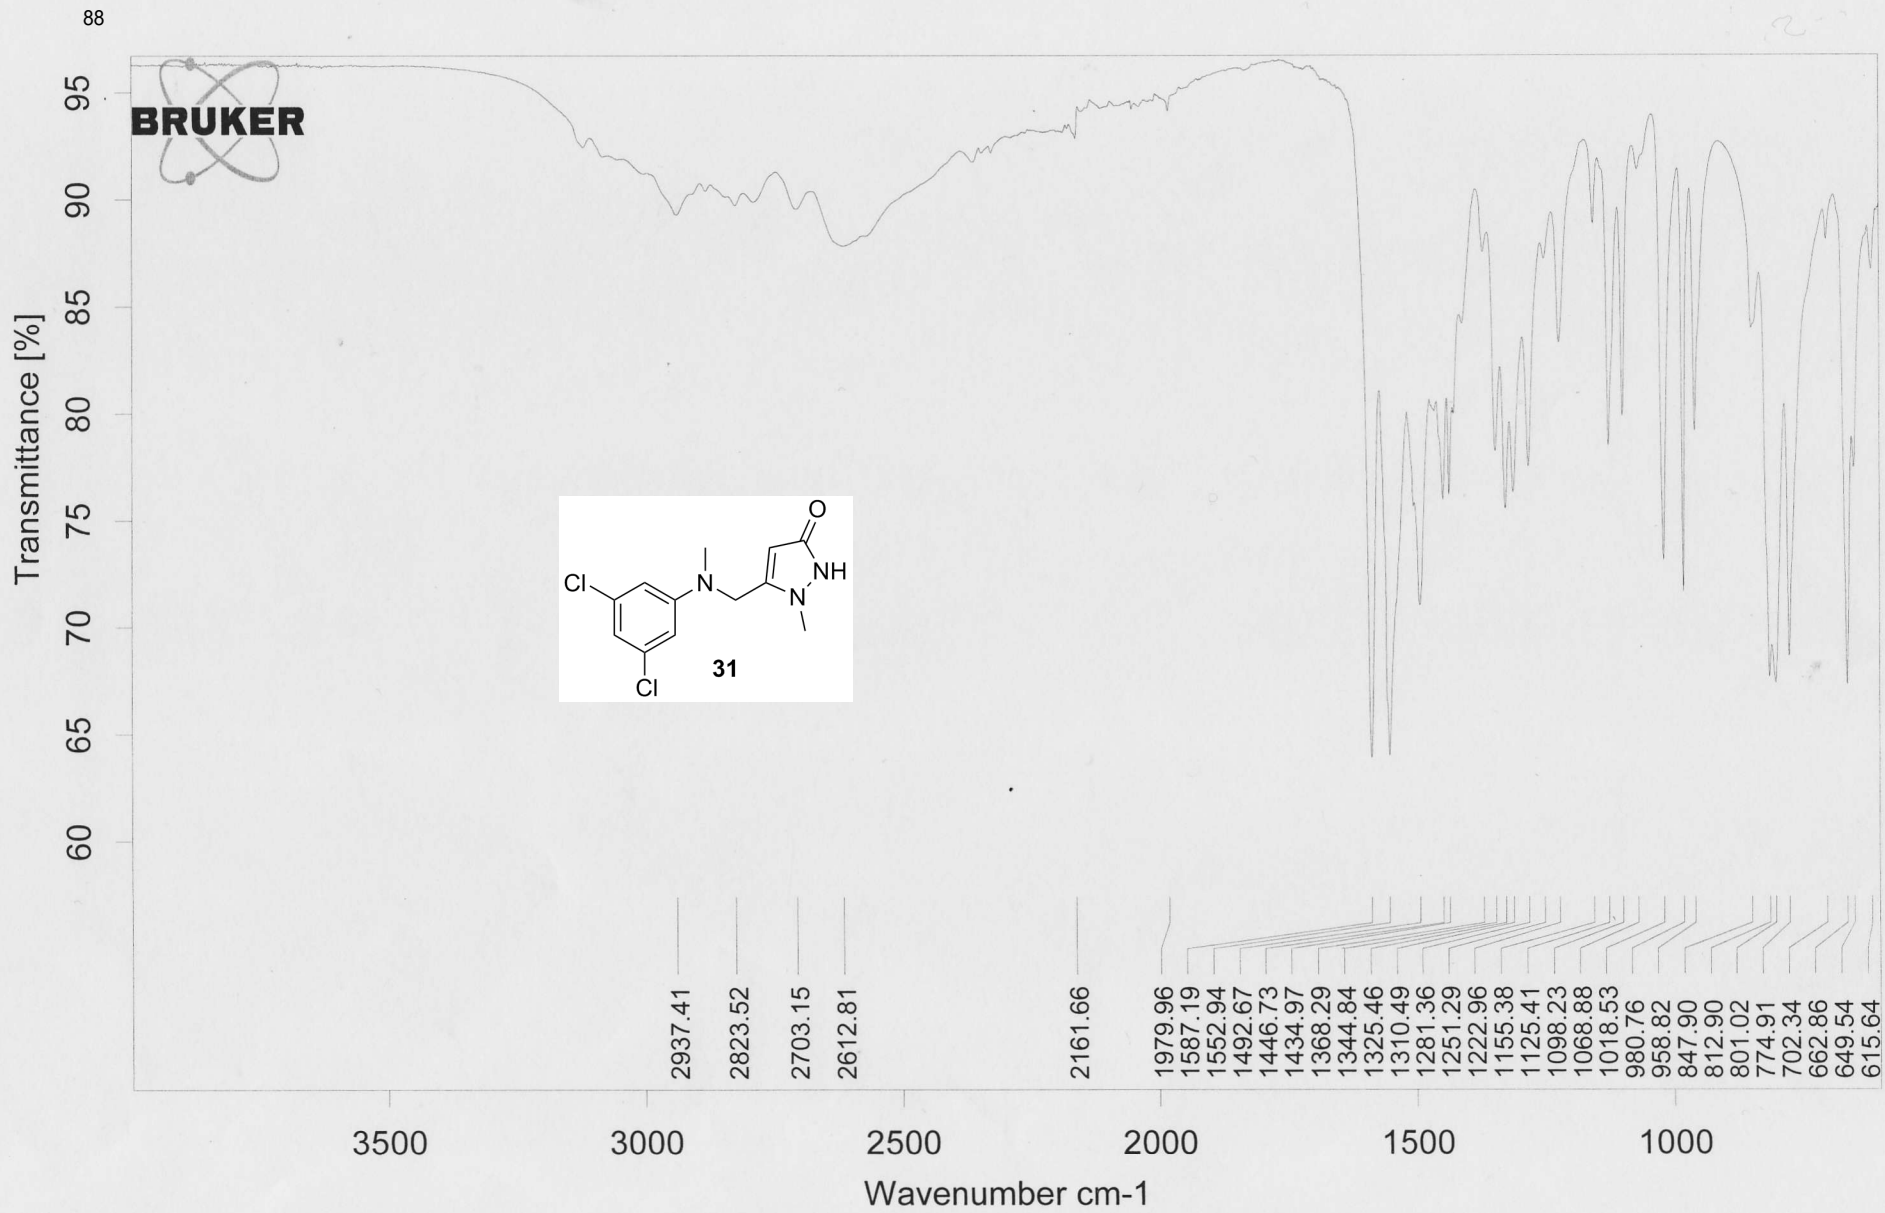

C:\Program Files\OPUS\_65\Data\Silverman\YZ-II94(solid).0

YZ-II94(solid)

Instrument type and / or accessory

04/10/2012



BRUKER

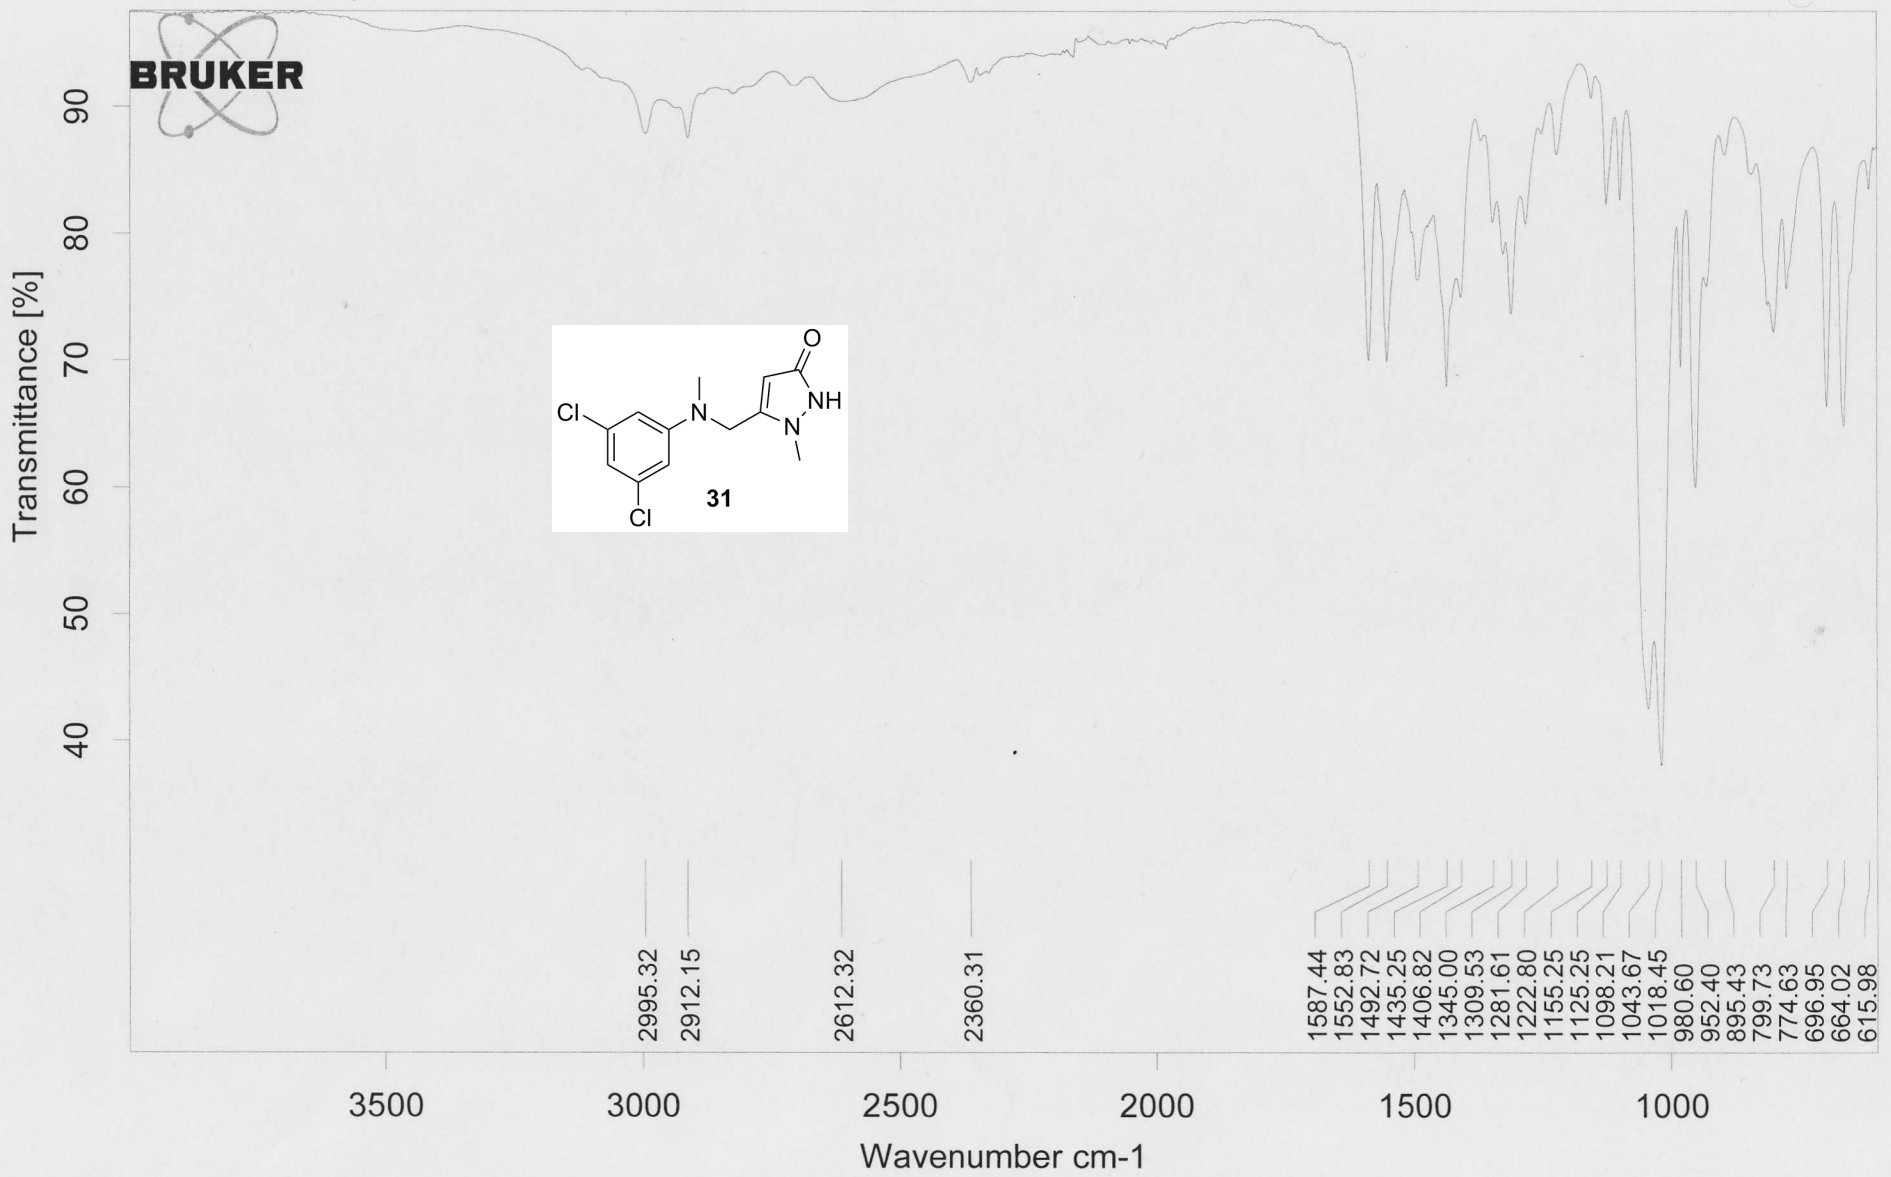

|                                                         |               |                                    |            |
|---------------------------------------------------------|---------------|------------------------------------|------------|
| C:\Program Files\OPUS_65\Data\Silverman\YZ-II94(DMSO).0 | YZ-II94(DMSO) | Instrument type and / or accessory | 04/10/2012 |
|---------------------------------------------------------|---------------|------------------------------------|------------|

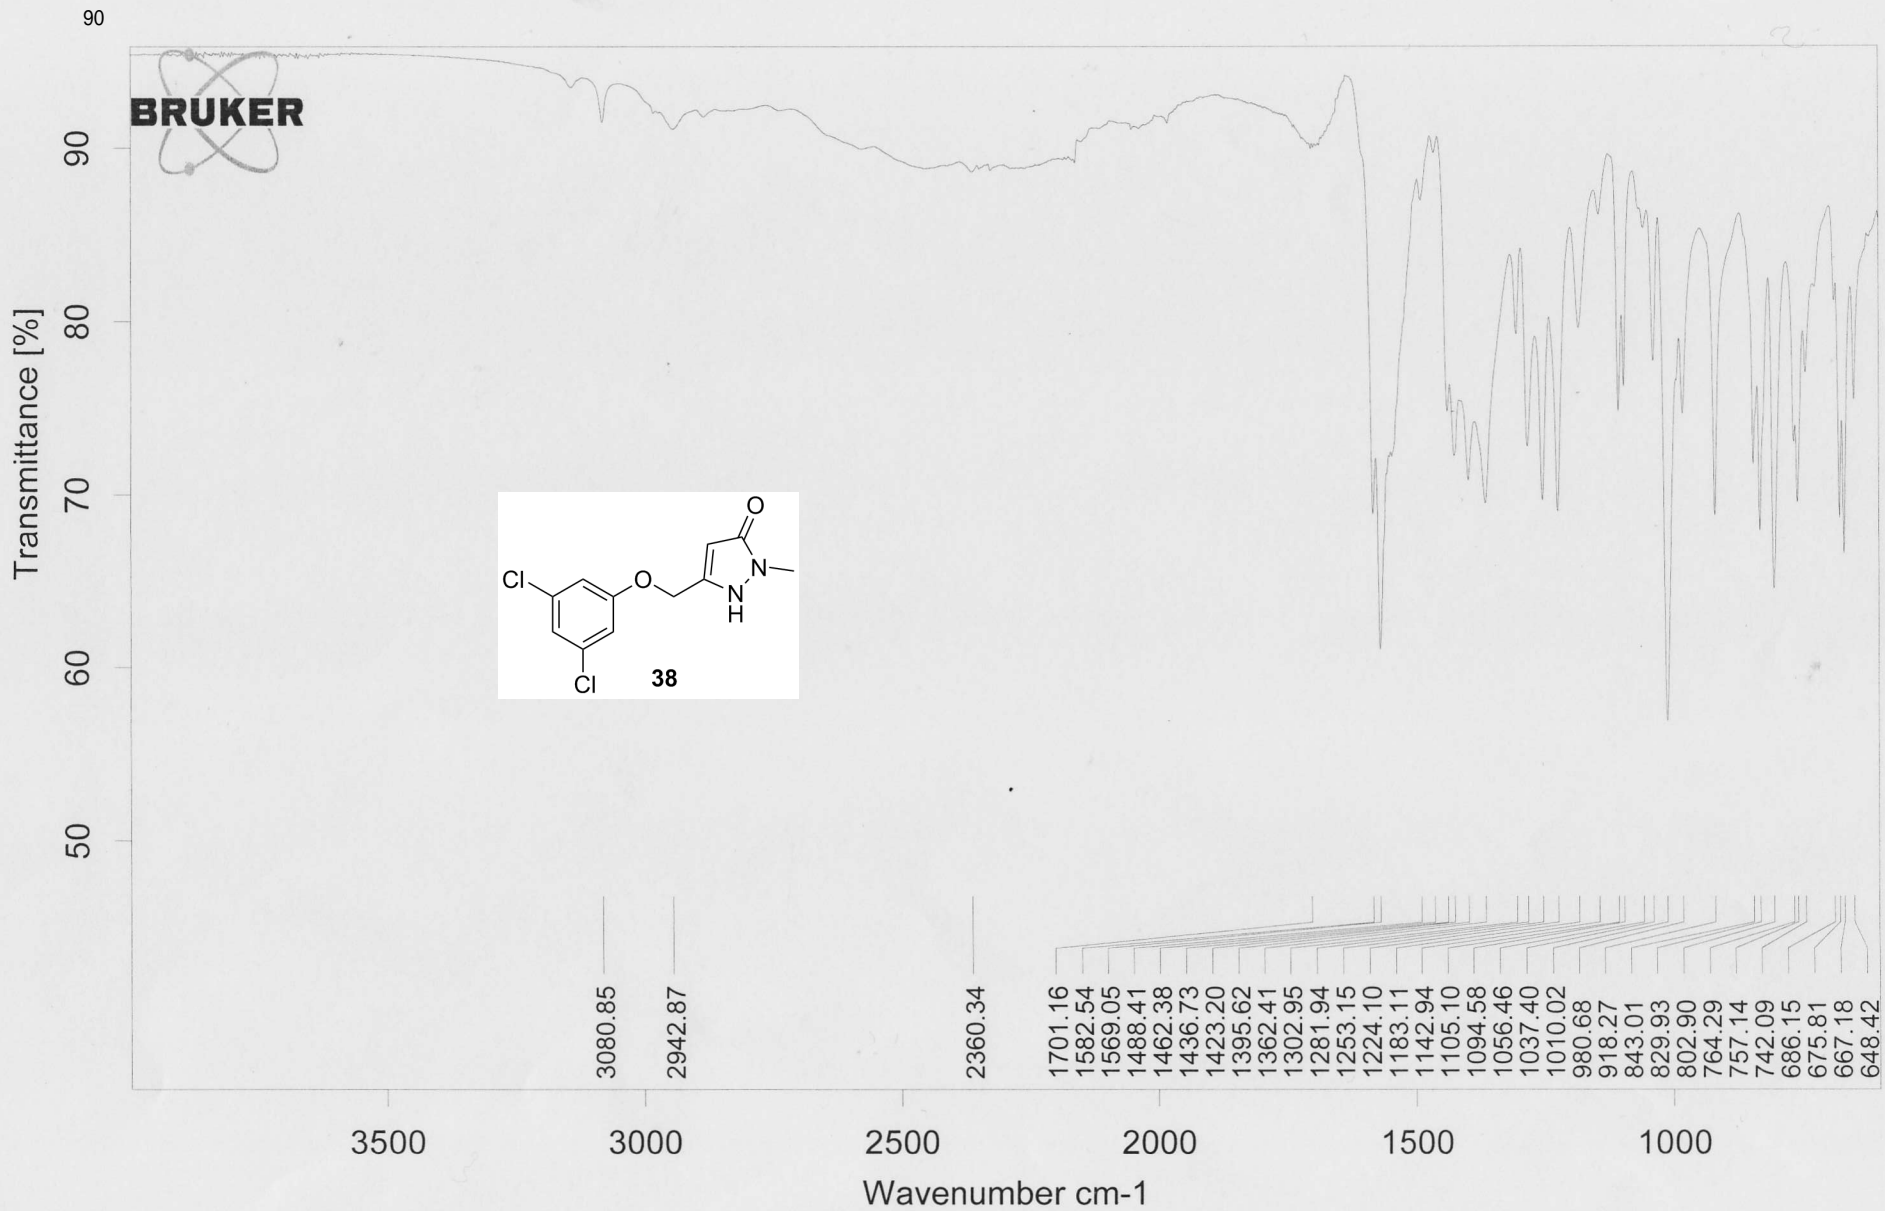

C:\PROGRAM FILES\OPUS\_65\DATA\Silverman\A-Dex.0

yz-IV30

Instrument type and / or accessory

08/10/2012

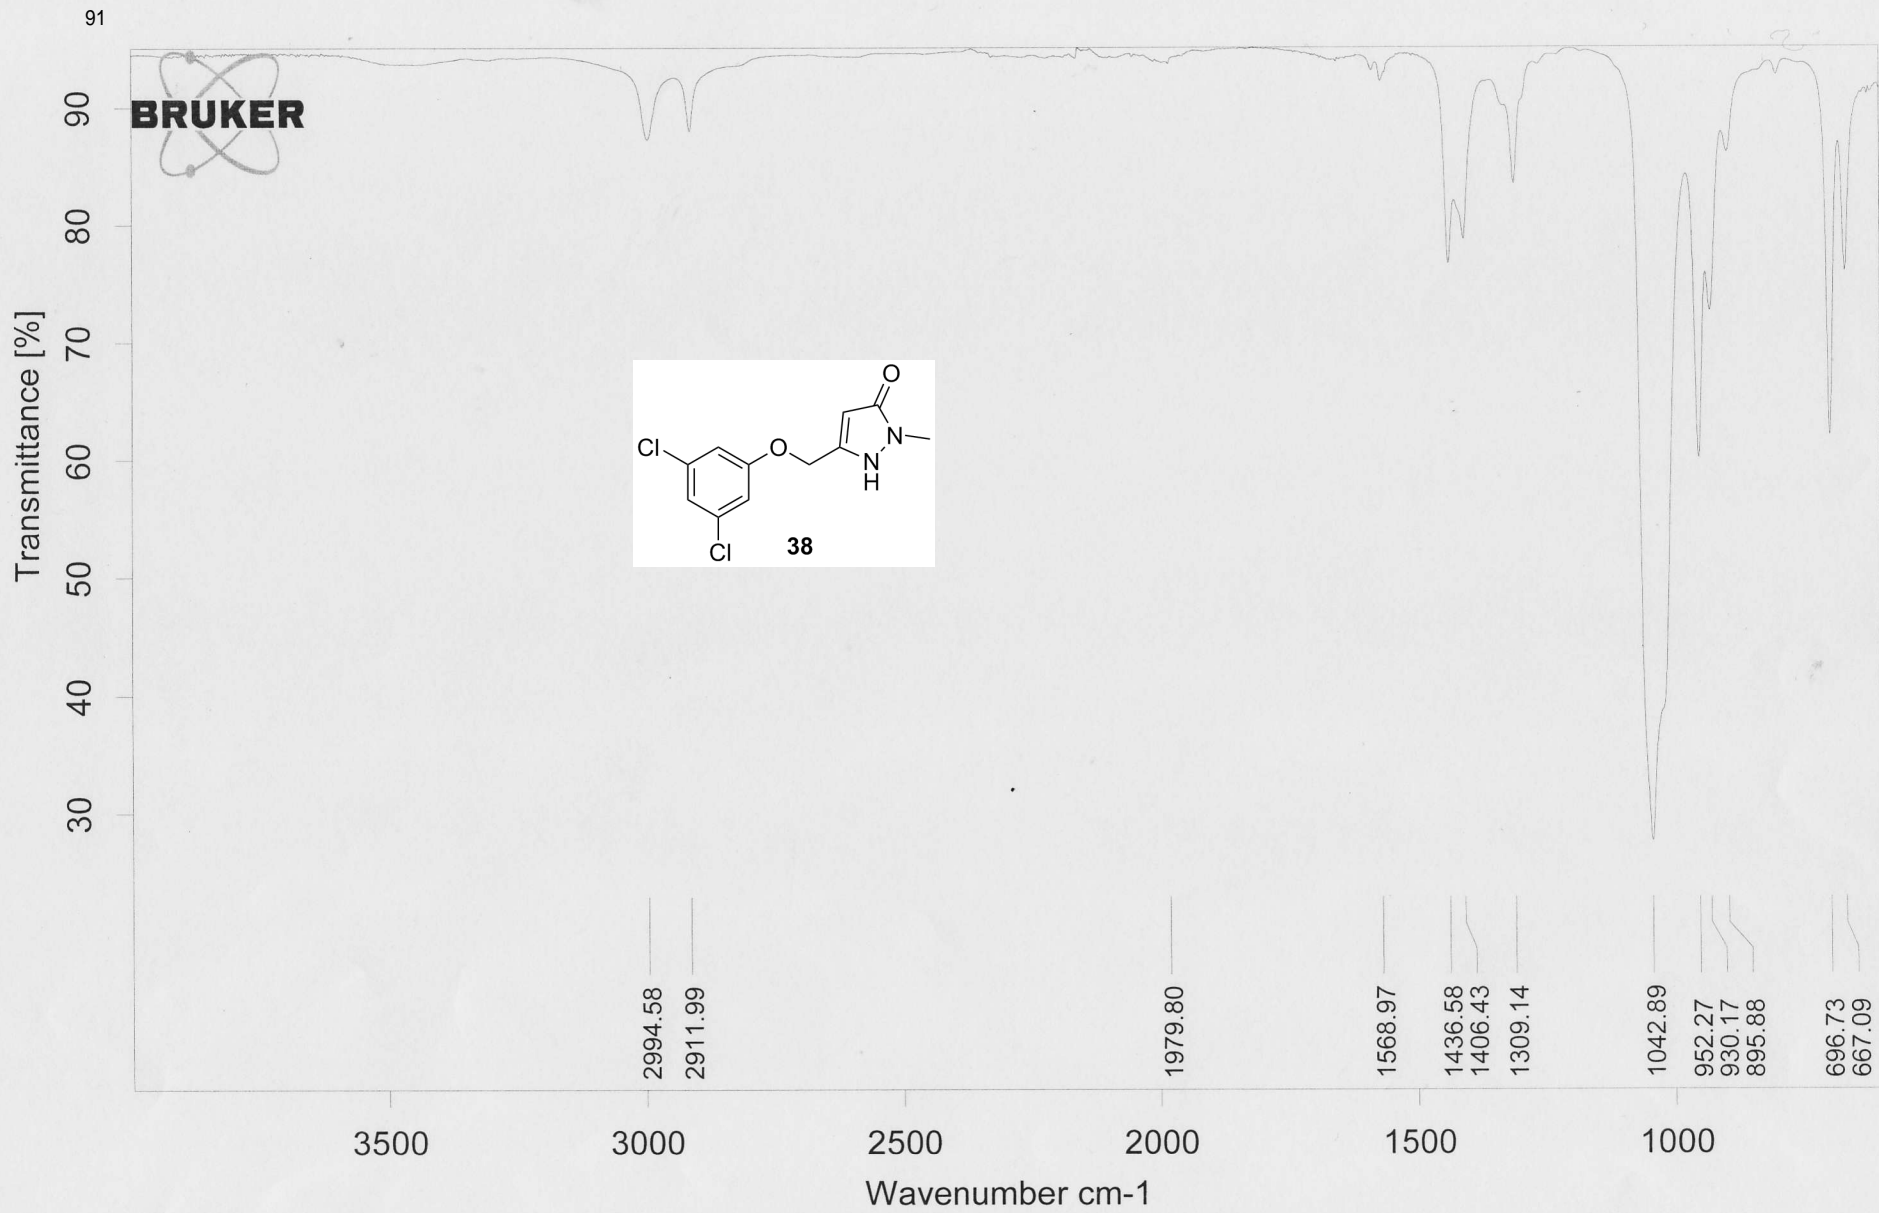

C:\PROGRAM FILES\OPUS\_65\DATA\Silvermanlyz-IV30(DMSO).0

yz-IV30(DMSO)

Instrument type and / or accessory

08/10/2012

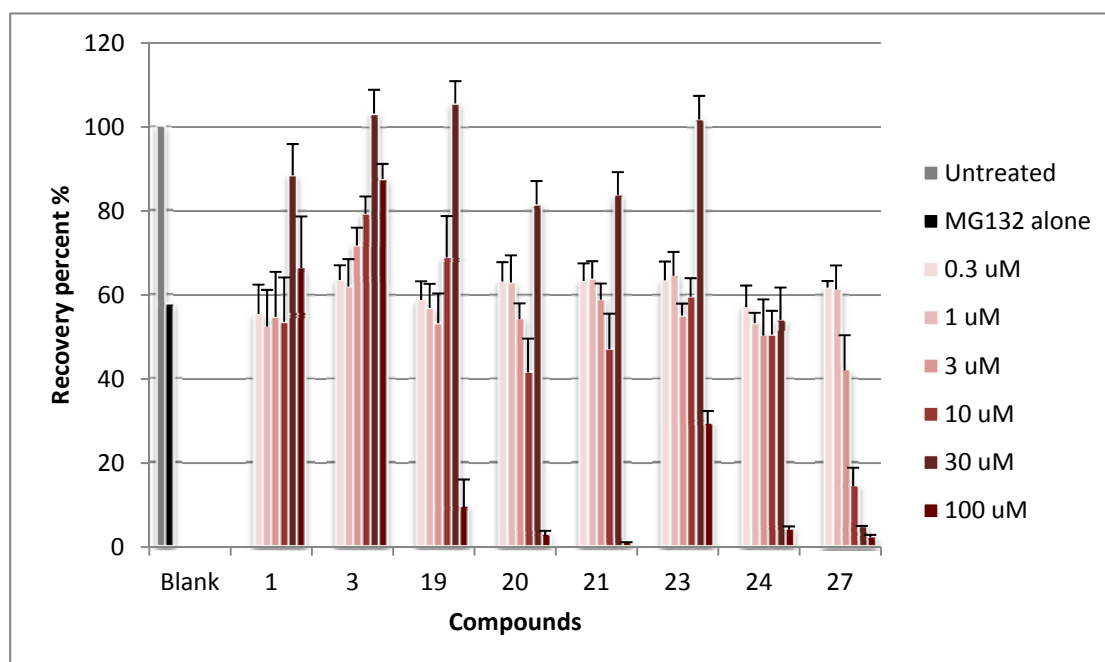

Figure 1. Qualitative primary cortical neurons protection assay.<sup>1</sup>

Table 1. EC<sub>50</sub> and viability of compounds **1-38**.

| Compounds | EC <sub>50</sub> <sup>a</sup> (μM) | Viability (%) | Compounds | EC <sub>50</sub> (μM) | Viability (%) |
|-----------|------------------------------------|---------------|-----------|-----------------------|---------------|
| 1         | 0.40                               | 103.1         | 2         | 0.78                  | 117.6         |
| 3         | 0.57                               | 100.1         | 4         | 0.75                  | 102.8         |
| 5         | 0.81                               | 111.7         | 6         | 1.27                  | 95.6          |
| 7         | 1.40                               | 103.9         | 8         | 0.83                  | 104.9         |
| 9         | 0.71                               | 104.9         | 10        | 0.75                  | 105.6         |
| 11        | 1.20                               | 101.2         | 12        | 0.83                  | 102.6         |
| 13        | 0.31                               | 105.5         | 14        | 0.42                  | 100.3         |
| 15        | 0.29                               | 106.6         | 16        | 0.35                  | 101.5         |
| 17        | 0.61                               | 110.6         | 18        | 1.27                  | 104.7         |
| 19        | 0.53                               | 113.2         | 20        | 0.69                  | 114.6         |
| 21        | 1.31                               | 119.4         | 22        | 1.02                  | 113.2         |
| 23        | 1.19                               | 104.9         | 24        | 1.45                  | 103.6         |
| 25        | 1.06                               | 98.0          | 26        | 0.80                  | 103.7         |
| 27        | 1.45                               | 96.2          | 28        | 0.65                  | 105.7         |
| 29        | 0.49                               | 106.2         | 30        | 0.75                  | 98.4          |
| 31        | >32                                | -             | 32        | >32                   | -             |
| 33        | >32                                | -             | 34        | >32                   | -             |
| 38        | 0.67                               | 101.7         |           |                       |               |

<sup>a</sup> An analog was considered to be inactive when EC<sub>50</sub> >32 μM.

<sup>1</sup> Zhang, Y.; Benmohamed, R.; Zhang, W.; Kim, J.; Edgerly, C. K.; Zhu, Y.; Morimoto, R. I.; Ferrante, R. J.; Kirsch, D. R.; Silverman, R. B. Chiral cyclohexane 1,3-diones as inhibitors of mutant SOD1-dependent protein aggregation for the treatment of amyotrophic lateral sclerosis. *ACS Med. Chem. Lett.* **2012**, *3*, 584-587.
